# Supplementary material for: Detrital garnet petrology challenges Paleoproterozoic ultrahigh-pressure metamorphism in western Greenland
Source: Copernicus journal article supplement (doi:10.5194/ejm-35-479-2023), 2023-07-17
Supplement: Supplementary file 1 [file ejm-35-479-2023-supplement.zip]

Archive with 3 entries (3 files):
- supplementary_figures.pdf
- ejm-35-479-2023-supplement-title-page.pdf
- supplementary_tables.xlsx
