# Supplementary material for: Detrital garnet petrology challenges Paleoproterozoic ultrahigh-pressure metamorphism in western Greenland
Source: Copernicus journal article supplement (doi:10.5194/ejm-35-479-2023), 2023-07-17
Supplement: Supplementary file 1 [file ejm-35-479-2023-supplement.zip › ejm-35-479-2023-supplement-title-page.pdf]

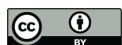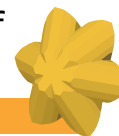

*Supplement of*

**Detrital garnet petrology challenges Paleoproterozoic ultrahigh-pressure metamorphism in western Greenland**

**Jan Schönig et al.**

*Correspondence to:* Jan Schönig ([jan.schoenig@uni-goettingen.de](mailto:jan.schoenig@uni-goettingen.de))

- [ejm-35-479-2023-supplement-title-page.pdf](#)
- [supplementary\\_figures.pdf](#)
- [supplementary\\_tables.xlsx](#)

The copyright of individual parts of the supplement might differ from the article licence.
