# Supplementary material for: Detrital garnet petrology challenges Paleoproterozoic ultrahigh-pressure metamorphism in western Greenland
Source: Copernicus journal article supplement (doi:10.5194/ejm-35-479-2023), 2023-07-17
Supplement: Supplementary file 1 [file ejm-35-479-2023-supplement.zip › supplementary_tables.xlsx]

## Sheet: Table S1
	Detrital garnet petrology challenges Paleoproterozoic ultrahigh-pressure metamorphism in western Greenland Jan Schönig1, Carsten Benner1, Guido Meinhold2, Hilmar von Eynatten1, N. Keno Lünsdorf1 1Department of Sedimentology and Environmental Geology, Geoscience Centre Göttingen, University of Göttingen, Göttingen, D-37077, Germany 2Institute of Geology, TU Bergakademie Freiberg, Freiberg, D-09599…
	sample number	mount label	grain-size fraction	grain number	best hit in database	hit index	hit quality	reflected light grey value	transmitted light grey value	final decision
	JS-NGO-01s	NGO-HM1	63-125	4490	Diopside	0.0342	good_hit	106	112	clinopyroxene
	JS-NGO-01s	NGO-HM1	63-125	4491	Ferrosilite	0.0347	good_hit	99	39	orthopyroxene
	JS-NGO-01s	NGO-HM1	63-125	4492	Pyrope	0.0203	good_hit	100	33	garnet
	JS-NGO-01s	NGO-HM1	63-125	4493	Amphibole	0.1665	medium_hit	98	11	amphibole
	JS-NGO-01s	NGO-HM1	63-125	4494	Pyrope	0.0387	good_hit	110	99	garnet
	JS-NGO-01s	NGO-HM1	63-125	4495	Augite	0.0734	good_hit	96	100	clinopyroxene
	JS-NGO-01s	NGO-HM1	63-125	4496	Pyrope	0.043	good_hit	116	158	garnet
	JS-NGO-01s	NGO-HM1	63-125	4497	Diopside	0.0656	good_hit	104	29	clinopyroxene
	JS-NGO-01s	NGO-HM1	63-125	4498	Edenite	0.0803	good_hit	98	10	amphibole
	JS-NGO-01s	NGO-HM1	63-125	4499	Diopside	0.0476	good_hit	104	98	clinopyroxene
	JS-NGO-01s	NGO-HM1	63-125	4500			noisy spectra	50	20	not_identified
	JS-NGO-01s	NGO-HM1	63-125	4501	Enstatite	0.0586	good_hit	110	129	orthopyroxene
	JS-NGO-01s	NGO-HM1	63-125	4502	Eglestonite	0.1979	ungrouped	78	27	phyllosilicate
	JS-NGO-01s	NGO-HM1	63-125	4503	Amphibole	0.0965	good_hit	97	22	amphibole
	JS-NGO-01s	NGO-HM1	63-125	4504	Fluorapatite	0.1968	medium_hit	97	127	apatite
	JS-NGO-01s	NGO-HM1	63-125	4505	Almandine	0.0436	good_hit	123	173	garnet
	JS-NGO-01s	NGO-HM1	63-125	4506	Amphibole	0.1474	good_hit	97	16	amphibole
	JS-NGO-01s	NGO-HM1	63-125	4507	Grunerite	0.196	medium_hit	94	89	amphibole
	JS-NGO-01s	NGO-HM1	63-125	4508	Enstatite	0.0462	good_hit	107	86	orthopyroxene
	JS-NGO-01s	NGO-HM1	63-125	4509	Pyrope	0.0453	good_hit	121	213	garnet
	JS-NGO-01s	NGO-HM1	63-125	4510	Diopside	0.2086	medium_hit	87	34	orthopyroxene
	JS-NGO-01s	NGO-HM1	63-125	4511	Pyrope	0.0385	good_hit	102	18	garnet
	JS-NGO-01s	NGO-HM1	63-125	4512	Enstatite	0.0335	good_hit	94	85	orthopyroxene
	JS-NGO-01s	NGO-HM1	63-125	4513	Almandine	0.2078	medium_hit	102	42	garnet
	JS-NGO-01s	NGO-HM1	63-125	4514	Diopside	0.0573	good_hit	91	40	clinopyroxene
	JS-NGO-01s	NGO-HM1	63-125	4515	Edenite	0.0578	good_hit	89	7	amphibole
	JS-NGO-01s	NGO-HM1	63-125	4516	Enstatite	0.0429	good_hit	106	95	orthopyroxene
	JS-NGO-01s	NGO-HM1	63-125	4517	Amphibole	0.1583	medium_hit	90	62	amphibole
	JS-NGO-01s	NGO-HM1	63-125	4518	Amphibole	0.0733	good_hit	95	49	amphibole
	JS-NGO-01s	NGO-HM1	63-125	4519	Edenite	0.0679	good_hit	95	59	amphibole
	JS-NGO-01s	NGO-HM1	63-125	4520	Amphibole	0.0747	good_hit	90	16	amphibole
	JS-NGO-01s	NGO-HM1	63-125	4521	Amphibole	0.0983	good_hit	93	6	amphibole
	JS-NGO-01s	NGO-HM1	63-125	4522	Ferroactinolite	0.4593	no_hit	98	103	not_identified
	JS-NGO-01s	NGO-HM1	63-125	4523	Augite	0.041	good_hit	100	30	clinopyroxene
	JS-NGO-01s	NGO-HM1	63-125	4524	Pyrope	0.029	good_hit	117	89	garnet
	JS-NGO-01s	NGO-HM1	63-125	4525	Amphibole	0.0625	good_hit	90	28	amphibole
	JS-NGO-01s	NGO-HM1	63-125	4526	Grunerite	0.2011	medium_hit	92	20	amphibole
	JS-NGO-01s	NGO-HM1	63-125	4527	Almandine	0.0456	good_hit	122	131	garnet
	JS-NGO-01s	NGO-HM1	63-125	4528	Actinolite	0.089	good_hit	90	92	amphibole
	JS-NGO-01s	NGO-HM1	63-125	4529	Pyrope	0.0346	good_hit	122	165	garnet
	JS-NGO-01s	NGO-HM1	63-125	4530	Epidote	0.1585	medium_hit	113	83	epidote
	JS-NGO-01s	NGO-HM1	63-125	4531	Actinolite	0.0907	good_hit	96	113	amphibole
	JS-NGO-01s	NGO-HM1	63-125	4532	Amphibole	0.1662	medium_hit	95	20	amphibole
	JS-NGO-01s	NGO-HM1	63-125	4533	Edenite	0.1683	medium_hit	84	24	amphibole
	JS-NGO-01s	NGO-HM1	63-125	4534	Pyrope	0.0525	good_hit	108	27	garnet
	JS-NGO-01s	NGO-HM1	63-125	4535			noisy spectra	95	12	amphibole
	JS-NGO-01s	NGO-HM1	63-125	4536	Clinozoisite	0.2613	medium_hit	101	127	epidote
	JS-NGO-01s	NGO-HM1	63-125	4537	Amphibole	0.1906	medium_hit	89	8	amphibole
	JS-NGO-01s	NGO-HM1	63-125	4538	Diopside	0.0753	good_hit	87	48	clinopyroxene
	JS-NGO-01s	NGO-HM1	63-125	4539	Diopside	0.0651	good_hit	97	65	orthopyroxene
	JS-NGO-01s	NGO-HM1	63-125	4540	Edenite	0.149	good_hit	86	13	amphibole
	JS-NGO-01s	NGO-HM1	63-125	4541	Magnetite	0.2987	medium_hit	255	5	opaque
	JS-NGO-01s	NGO-HM1	63-125	4542	Amphibole	0.2351	medium_hit	93	13	amphibole
	JS-NGO-01s	NGO-HM1	63-125	4543	Pyrope	0.2963	medium_hit	113	20	garnet
	JS-NGO-01s	NGO-HM1	63-125	4544	Amphibole	0.1943	medium_hit	93	14	amphibole
	JS-NGO-01s	NGO-HM1	63-125	4545	Tremolite	0.0545	good_hit	87	30	amphibole
	JS-NGO-01s	NGO-HM1	63-125	4546	Ferrosilite	0.0263	good_hit	103	11	orthopyroxene
	JS-NGO-01s	NGO-HM1	63-125	4547	Diopside	0.3577	no_hit	93	19	not_identified
	JS-NGO-01s	NGO-HM1	63-125	4548	Diopside	0.1452	good_hit	108	220	clinopyroxene
	JS-NGO-01s	NGO-HM1	63-125	4549	Annite	0.2708	medium_hit	96	7	amphibole
	JS-NGO-01s	NGO-HM1	63-125	4550			noisy spectra	96	11	amphibole
	JS-NGO-01s	NGO-HM1	63-125	4551	Ferrosilite	0.0274	good_hit	105	38	orthopyroxene
	JS-NGO-01s	NGO-HM1	63-125	4552	Enstatite	0.0683	good_hit	105	115	orthopyroxene
	JS-NGO-01s	NGO-HM1	63-125	4553	Enstatite	0.061	good_hit	106	71	orthopyroxene
	JS-NGO-01s	NGO-HM1	63-125	4554	Amphibole	0.1056	good_hit	93	6	amphibole
	JS-NGO-01s	NGO-HM1	63-125	4555	Amphibole	0.121	good_hit	93	19	amphibole
	JS-NGO-01s	NGO-HM1	63-125	4556	Sillimanite	0.0393	good_hit	97	166	sillimanite
	JS-NGO-01s	NGO-HM1	63-125	4557	Edenite	0.1192	good_hit	85	8	amphibole
	JS-NGO-01s	NGO-HM1	63-125	4558	Amphibole	0.1747	medium_hit	94	29	amphibole
	JS-NGO-01s	NGO-HM1	63-125	4559	Actinolite	0.1267	good_hit	89	37	amphibole
	JS-NGO-01s	NGO-HM1	63-125	4560	Edenite	0.1044	good_hit	94	16	amphibole
	JS-NGO-01s	NGO-HM1	63-125	4561	Diopside	0.0378	good_hit	90	80	orthopyroxene
	JS-NGO-01s	NGO-HM1	63-125	4562	Diopside	0.0271	good_hit	93	31	clinopyroxene
	JS-NGO-01s	NGO-HM1	63-125	4563	Rutile	0.0726	good_hit	254	9	rutile
	JS-NGO-01s	NGO-HM1	63-125	4564	Amphibole	0.3406	no_hit	91	23	amphibole
	JS-NGO-01s	NGO-HM1	63-125	4565	Diopside	0.074	good_hit	92	43	clinopyroxene
	JS-NGO-01s	NGO-HM1	63-125	4566	Pargasite	0.287	medium_hit	95	11	amphibole
	JS-NGO-01s	NGO-HM1	63-125	4567	Annite	0.3319	no_hit	91	6	amphibole
	JS-NGO-01s	NGO-HM1	63-125	4568	Actinolite	0.0827	good_hit	90	28	amphibole
	JS-NGO-01s	NGO-HM1	63-125	4569	Amphibole	0.3011	no_hit	97	5	amphibole
	JS-NGO-01s	NGO-HM1	63-125	4570	Amphibole	0.2785	medium_hit	99	7	amphibole
	JS-NGO-01s	NGO-HM1	63-125	4571	Senarmontite	0.1262	ungrouped	247	5	opaque
	JS-NGO-01s	NGO-HM1	63-125	4572	Amphibole	0.1577	medium_hit	99	6	amphibole
	JS-NGO-01s	NGO-HM1	63-125	4573	Hematite	0.1452	good_hit	253	6	opaque
	JS-NGO-01s	NGO-HM1	63-125	4574	Diopside	0.049	good_hit	101	57	clinopyroxene
	JS-NGO-01s	NGO-HM1	63-125	4575	Pyrope	0.0298	good_hit	121	91	garnet
	JS-NGO-01s	NGO-HM1	63-125	4576	Enstatite	0.0881	good_hit	97	75	orthopyroxene
	JS-NGO-01s	NGO-HM1	63-125	4577	Almandine	0.0443	good_hit	113	29	garnet
	JS-NGO-01s	NGO-HM1	63-125	4578	Actinolite	0.5047	no_hit	88	69	not_identified
	JS-NGO-01s	NGO-HM1	63-125	4579			noisy spectra	98	41	not_identified
	JS-NGO-01s	NGO-HM1	63-125	4580	Enstatite	0.064	good_hit	109	115	orthopyroxene
	JS-NGO-01s	NGO-HM1	63-125	4581	Quartz	0.0222	good_hit	72	18	quartz
	JS-NGO-01s	NGO-HM1	63-125	4582	Epidote	0.2421	medium_hit	116	102	epidote
	JS-NGO-01s	NGO-HM1	63-125	4583	Forsterite	0.0294	good_hit	104	153	olivine
	JS-NGO-01s	NGO-HM1	63-125	4584	Enstatite	0.0451	good_hit	103	62	orthopyroxene
	JS-NGO-01s	NGO-HM1	63-125	4585	Amphibole	0.1082	good_hit	94	30	amphibole
	JS-NGO-01s	NGO-HM1	63-125	4586	Diopside	0.0388	good_hit	93	21	clinopyroxene
	JS-NGO-01s	NGO-HM1	63-125	4587	Hydromagnesite	0.609	ungrouped	36	100	not_identified
	JS-NGO-01s	NGO-HM1	63-125	4588	Spessartine	0.0503	good_hit	98	79	garnet
	JS-NGO-01s	NGO-HM1	63-125	4589	Edenite	0.228	medium_hit	88	37	amphibole
	JS-NGO-01s	NGO-HM1	63-125	4590	Amphibole	0.3123	no_hit	100	5	amphibole
	JS-NGO-01s	NGO-HM1	63-125	4591	Amphibole	0.1894	medium_hit	98	52	amphibole
	JS-NGO-01s	NGO-HM1	63-125	4592	Pyrope	0.0267	good_hit	123	129	garnet
	JS-NGO-01s	NGO-HM1	63-125	4593	Pyrope	0.0452	good_hit	113	117	garnet
	JS-NGO-01s	NGO-HM1	63-125	4594	Amphibole	0.2658	medium_hit	91	6	amphibole
	JS-NGO-01s	NGO-HM1	63-125	4595	Edenite	0.0759	good_hit	88	14	amphibole
	JS-NGO-01s	NGO-HM1	63-125	4596	Pyrope	0.0347	good_hit	111	73	garnet
	JS-NGO-01s	NGO-HM1	63-125	4597	Hastingsite	0.4566	no_hit	100	65	not_identified
	JS-NGO-01s	NGO-HM1	63-125	4598	Amphibole	0.1075	good_hit	94	59	amphibole
	JS-NGO-01s	NGO-HM1	63-125	4599	Edenite	0.0941	good_hit	95	11	amphibole
	JS-NGO-01s	NGO-HM1	63-125	4600	Amphibole	0.2284	medium_hit	96	22	amphibole
	JS-NGO-01s	NGO-HM1	63-125	4601	Diopside	0.0384	good_hit	97	79	clinopyroxene
	JS-NGO-01s	NGO-HM1	63-125	4602	Enstatite	0.0511	good_hit	109	118	orthopyroxene
	JS-NGO-01s	NGO-HM1	63-125	4603	Annite	0.3443	no_hit	100	26	amphibole
	JS-NGO-01s	NGO-HM1	63-125	4604	Albite	0.1196	good_hit	75	136	feldspar
	JS-NGO-01s	NGO-HM1	63-125	4605	Amphibole	0.3068	no_hit	97	37	amphibole
	JS-NGO-01s	NGO-HM1	63-125	4606	Ferrosilite	0.0472	good_hit	108	139	orthopyroxene
	JS-NGO-01s	NGO-HM1	63-125	4607	Spessartine	0.0572	good_hit	123	84	garnet
	JS-NGO-01s	NGO-HM1	63-125	4608	Titanite	0.0907	good_hit	152	92	titanite
	JS-NGO-01s	NGO-HM1	63-125	4609	Ferrosilite	0.0443	good_hit	107	98	orthopyroxene
	JS-NGO-01s	NGO-HM1	63-125	4610	Enstatite	0.0869	good_hit	99	108	orthopyroxene
	JS-NGO-01s	NGO-HM1	63-125	4611	Ilmenite	0.1756	medium_hit	188	7	opaque
	JS-NGO-01s	NGO-HM1	63-125	4612	Diopside	0.0551	good_hit	89	42	clinopyroxene
	JS-NGO-01s	NGO-HM1	63-125	4613	Ferrosilite	0.0387	good_hit	94	7	orthopyroxene
	JS-NGO-01s	NGO-HM1	63-125	4614	Pyrope	0.2677	medium_hit	111	100	garnet
	JS-NGO-01s	NGO-HM1	63-125	4615	Amphibole	0.2482	medium_hit	88	11	amphibole
	JS-NGO-01s	NGO-HM1	63-125	4616	Amphibole	0.3413	no_hit	82	7	amphibole
	JS-NGO-01s	NGO-HM1	63-125	4617	Spessartine	0.0658	good_hit	119	33	garnet
	JS-NGO-01s	NGO-HM1	63-125	4618	Amphibole	0.0641	good_hit	100	48	amphibole
	JS-NGO-01s	NGO-HM1	63-125	4619	Enstatite	0.0607	good_hit	103	31	orthopyroxene
	JS-NGO-01s	NGO-HM1	63-125	4620	Amphibole	0.0694	good_hit	88	19	amphibole
	JS-NGO-01s	NGO-HM1	63-125	4621	Amphibole	0.2845	medium_hit	93	7	amphibole
	JS-NGO-01s	NGO-HM1	63-125	4622	Diopside	0.0431	good_hit	100	94	clinopyroxene
	JS-NGO-01s	NGO-HM1	63-125	4623	Almandine	0.041	good_hit	120	131	garnet
	JS-NGO-01s	NGO-HM1	63-125	4624	Edenite	0.1177	good_hit	91	17	amphibole
	JS-NGO-01s	NGO-HM1	63-125	4625	Enstatite	0.0554	good_hit	105	26	orthopyroxene
	JS-NGO-01s	NGO-HM1	63-125	4626	Enstatite	0.0857	good_hit	100	106	orthopyroxene
	JS-NGO-01s	NGO-HM1	63-125	4627	Amphibole	0.0263	good_hit	94	31	amphibole
	JS-NGO-01s	NGO-HM1	63-125	4628	Quartz	0.0257	good_hit	76	75	quartz
	JS-NGO-01s	NGO-HM1	63-125	4629	BeaveriteCu	0.7569	ungrouped	78	112	not_identified
	JS-NGO-01s	NGO-HM1	63-125	4630	Augite	0.064	good_hit	100	14	clinopyroxene
	JS-NGO-01s	NGO-HM1	63-125	4631	Edenite	0.1023	good_hit	80	67	amphibole
	JS-NGO-01s	NGO-HM1	63-125	4632	Edenite	0.0566	good_hit	88	19	amphibole
	JS-NGO-01s	NGO-HM1	63-125	4633	Fluorapatite	0.1699	medium_hit	92	107	apatite
	JS-NGO-01s	NGO-HM1	63-125	4634	Diopside	0.0638	good_hit	100	72	clinopyroxene
	JS-NGO-01s	NGO-HM1	63-125	4635	Edenite	0.0921	good_hit	92	19	amphibole
	JS-NGO-01s	NGO-HM1	63-125	4636	Enstatite	0.0812	good_hit	88	103	orthopyroxene
	JS-NGO-01s	NGO-HM1	63-125	4637	Pyrope	0.0332	good_hit	117	111	garnet
	JS-NGO-01s	NGO-HM1	63-125	4638	Manganvesuvianite	0.4821	no_hit	245	7	not_identified
	JS-NGO-01s	NGO-HM1	63-125	4639	Amphibole	0.1428	good_hit	98	23	amphibole
	JS-NGO-01s	NGO-HM1	63-125	4640	Edenite	0.0776	good_hit	96	7	amphibole
	JS-NGO-01s	NGO-HM1	63-125	4641	Amphibole	0.0752	good_hit	97	5	amphibole
	JS-NGO-01s	NGO-HM1	63-125	4642	Enstatite	0.1364	good_hit	101	146	orthopyroxene
	JS-NGO-01s	NGO-HM1	63-125	4643	Diopside	0.0669	good_hit	97	68	clinopyroxene
	JS-NGO-01s	NGO-HM1	63-125	4644	Enstatite	0.0909	good_hit	108	60	orthopyroxene
	JS-NGO-01s	NGO-HM1	63-125	4645	Augite	0.0535	good_hit	99	25	clinopyroxene
	JS-NGO-01s	NGO-HM1	63-125	4646	Enstatite	0.0345	good_hit	103	78	orthopyroxene
	JS-NGO-01s	NGO-HM1	63-125	4647	Enstatite	0.0592	good_hit	104	25	orthopyroxene
	JS-NGO-01s	NGO-HM1	63-125	4648	Annite	0.3009	no_hit	97	6	amphibole
	JS-NGO-01s	NGO-HM1	63-125	4649	Spessartine	0.0656	good_hit	113	127	garnet
	JS-NGO-01s	NGO-HM1	63-125	4650	Enstatite	0.0681	good_hit	102	34	orthopyroxene
	JS-NGO-01s	NGO-HM1	63-125	4651	Pyrope	0.0438	good_hit	104	65	garnet
	JS-NGO-01s	NGO-HM1	63-125	4652	Amphibole	0.1591	medium_hit	76	22	amphibole
	JS-NGO-01s	NGO-HM1	63-125	4653	Ferrosilite	0.0729	good_hit	81	13	orthopyroxene
	JS-NGO-01s	NGO-HM1	63-125	4654	Amphibole	0.2975	medium_hit	86	14	amphibole
	JS-NGO-01s	NGO-HM1	63-125	4655	Edenite	0.1103	good_hit	88	76	amphibole
	JS-NGO-01s	NGO-HM1	63-125	4656	Pyrope	0.0161	good_hit	105	30	garnet
	JS-NGO-01s	NGO-HM1	63-125	4657			noisy spectra	42	16	not_identified
	JS-NGO-01s	NGO-HM1	63-125	4658	Amphibole	0.0951	good_hit	87	14	amphibole
	JS-NGO-01s	NGO-HM1	63-125	4659	Epidote	0.2813	medium_hit	110	239	epidote
	JS-NGO-01s	NGO-HM1	63-125	4660	Quartz	0.0521	good_hit	70	17	quartz
	JS-NGO-01s	NGO-HM1	63-125	4661	Diopside	0.0603	good_hit	100	77	clinopyroxene
	JS-NGO-01s	NGO-HM1	63-125	4662	Edenite	0.0984	good_hit	86	27	amphibole
	JS-NGO-01s	NGO-HM1	63-125	4663	Enstatite	0.0406	good_hit	102	11	orthopyroxene
	JS-NGO-01s	NGO-HM1	63-125	4664	Semseyite	0.2513	ungrouped	200	7	not_identified
	JS-NGO-01s	NGO-HM1	63-125	4665	Enstatite	0.0604	good_hit	104	71	orthopyroxene
	JS-NGO-01s	NGO-HM1	63-125	4666	Amphibole	0.2938	medium_hit	99	12	amphibole
	JS-NGO-01s	NGO-HM1	63-125	4667	Augite	0.0745	good_hit	91	28	clinopyroxene
	JS-NGO-01s	NGO-HM1	63-125	4668	Pyrope	0.0413	good_hit	107	147	garnet
	JS-NGO-01s	NGO-HM1	63-125	4669	Amphibole	0.1967	medium_hit	80	9	amphibole
	JS-NGO-01s	NGO-HM1	63-125	4670	Diopside	0.0493	good_hit	87	73	clinopyroxene
	JS-NGO-01s	NGO-HM1	63-125	4671	Augite	0.0613	good_hit	87	29	clinopyroxene
	JS-NGO-01s	NGO-HM1	63-125	4672	Pyrope	0.0379	good_hit	103	100	garnet
	JS-NGO-01s	NGO-HM1	63-125	4673	Ilmenite	0.2218	medium_hit	225	7	opaque
	JS-NGO-01s	NGO-HM1	63-125	4674	Pyrope	0.0427	good_hit	102	66	garnet
	JS-NGO-01s	NGO-HM1	63-125	4675	Ferrosilite	0.0642	good_hit	88	62	orthopyroxene
	JS-NGO-01s	NGO-HM1	63-125	4676	Edenite	0.1136	good_hit	89	6	amphibole
	JS-NGO-01s	NGO-HM1	63-125	4677	Amphibole	0.098	good_hit	92	12	amphibole
	JS-NGO-01s	NGO-HM1	63-125	4678	Actinolite	0.1009	good_hit	89	21	amphibole
	JS-NGO-01s	NGO-HM1	63-125	4679	Diopside	0.0545	good_hit	69	73	orthopyroxene
	JS-NGO-01s	NGO-HM1	63-125	4680	Diopside	0.0403	good_hit	79	83	orthopyroxene
	JS-NGO-01s	NGO-HM1	63-125	4681	Diopside	0.084	good_hit	83	65	clinopyroxene
	JS-NGO-01s	NGO-HM1	63-125	4682	Ferrosilite	0.0303	good_hit	98	44	orthopyroxene
	JS-NGO-01s	NGO-HM1	63-125	4683	Actinolite	0.1005	good_hit	87	40	amphibole
	JS-NGO-01s	NGO-HM1	63-125	4684	Edenite	0.2013	medium_hit	98	10	amphibole
	JS-NGO-01s	NGO-HM1	63-125	4685	Enstatite	0.0496	good_hit	110	34	orthopyroxene
	JS-NGO-01s	NGO-HM1	63-125	4686	Pyrope	0.0492	good_hit	112	69	garnet
	JS-NGO-01s	NGO-HM1	63-125	4687	Sillimanite	0.0273	good_hit	94	118	sillimanite
	JS-NGO-01s	NGO-HM1	63-125	4688	Amphibole	0.4277	no_hit	98	29	amphibole
	JS-NGO-01s	NGO-HM1	63-125	4689	Almandine	0.046	good_hit	119	144	garnet
	JS-NGO-01s	NGO-HM1	63-125	4690	Amphibole	0.2298	medium_hit	95	6	amphibole
	JS-NGO-01s	NGO-HM1	63-125	4691	Pyrope	0.0468	good_hit	110	61	garnet
	JS-NGO-01s	NGO-HM1	63-125	4692	Pyrope	0.0576	good_hit	116	13	garnet
	JS-NGO-01s	NGO-HM1	63-125	4693	Pyrope	0.0289	good_hit	119	77	garnet
	JS-NGO-01s	NGO-HM1	63-125	4694	Epidote	0.2819	medium_hit	112	68	epidote
	JS-NGO-01s	NGO-HM1	63-125	4695	Enstatite	0.064	good_hit	104	73	orthopyroxene
	JS-NGO-01s	NGO-HM1	63-125	4696	Annite	0.2738	medium_hit	100	5	amphibole
	JS-NGO-01s	NGO-HM1	63-125	4697	Amphibole	0.2566	medium_hit	95	11	amphibole
	JS-NGO-01s	NGO-HM1	63-125	4698	Amphibole	0.0873	good_hit	94	36	amphibole
	JS-NGO-01s	NGO-HM1	63-125	4699	Edenite	0.1931	medium_hit	95	7	amphibole
	JS-NGO-01s	NGO-HM1	63-125	4700	Edenite	0.0666	good_hit	85	8	amphibole
	JS-NGO-01s	NGO-HM1	63-125	4701	Augite	0.162	medium_hit	106	98	orthopyroxene
	JS-NGO-01s	NGO-HM1	63-125	4702	Enstatite	0.0945	good_hit	101	174	orthopyroxene
	JS-NGO-01s	NGO-HM1	63-125	4703	Enstatite	0.0329	good_hit	110	113	orthopyroxene
	JS-NGO-01s	NGO-HM1	63-125	4704	Pyrope	0.0209	good_hit	114	101	garnet
	JS-NGO-01s	NGO-HM1	63-125	4705	Amphibole	0.0599	good_hit	97	10	amphibole
	JS-NGO-01s	NGO-HM1	63-125	4706	Diopside	0.0353	good_hit	105	79	orthopyroxene
	JS-NGO-01s	NGO-HM1	63-125	4707	Augite	0.0508	good_hit	97	116	clinopyroxene
	JS-NGO-01s	NGO-HM1	63-125	4708	Titanite	0.2202	medium_hit	131	12	titanite
	JS-NGO-01s	NGO-HM1	63-125	4709	Diopside	0.1533	medium_hit	94	13	clinopyroxene
	JS-NGO-01s	NGO-HM1	63-125	4710	Edenite	0.0785	good_hit	89	8	amphibole
	JS-NGO-01s	NGO-HM1	63-125	4711	Diopside	0.0947	good_hit	99	45	orthopyroxene
	JS-NGO-01s	NGO-HM1	63-125	4712	Amphibole	0.0808	good_hit	100	16	amphibole
	JS-NGO-01s	NGO-HM1	63-125	4713	Amphibole	0.1755	medium_hit	94	8	amphibole
	JS-NGO-01s	NGO-HM1	63-125	4714	Edenite	0.0685	good_hit	92	10	amphibole
	JS-NGO-01s	NGO-HM1	63-125	4715	Pyrope	0.0307	good_hit	119	37	garnet
	JS-NGO-01s	NGO-HM1	63-125	4716	Pyrope	0.0411	good_hit	103	125	garnet
	JS-NGO-01s	NGO-HM1	63-125	4717	Pyrope	0.042	good_hit	98	12	garnet
	JS-NGO-01s	NGO-HM1	63-125	4718	Edenite	0.1427	good_hit	99	6	amphibole
	JS-NGO-01s	NGO-HM1	63-125	4719	Amphibole	0.1268	good_hit	101	18	amphibole
	JS-NGO-01s	NGO-HM1	63-125	4720	Semseyite	0.2373	ungrouped	236	6	opaque
	JS-NGO-01s	NGO-HM1	63-125	4721	Tremolite	0.0445	good_hit	96	67	amphibole
	JS-NGO-01s	NGO-HM1	63-125	4722	Pyrope	0.0232	good_hit	121	73	garnet
	JS-NGO-01s	NGO-HM1	63-125	4723	Amphibole	0.2452	medium_hit	94	27	amphibole
	JS-NGO-01s	NGO-HM1	63-125	4724			noisy spectra	120	37	garnet
	JS-NGO-01s	NGO-HM1	63-125	4725	Quartz	0.0292	good_hit	71	89	quartz
	JS-NGO-01s	NGO-HM1	63-125	4726	Diopside	0.0922	good_hit	96	65	clinopyroxene
	JS-NGO-01s	NGO-HM1	63-125	4727	Enstatite	0.0534	good_hit	99	174	orthopyroxene
	JS-NGO-01s	NGO-HM1	63-125	4728	Edenite	0.1627	medium_hit	99	43	amphibole
	JS-NGO-01s	NGO-HM1	63-125	4729	Enstatite	0.0918	good_hit	91	84	orthopyroxene
	JS-NGO-01s	NGO-HM1	63-125	4730	Edenite	0.1169	good_hit	96	21	amphibole
	JS-NGO-01s	NGO-HM1	63-125	4731	Enstatite	0.1683	medium_hit	112	81	orthopyroxene
	JS-NGO-01s	NGO-HM1	63-125	4732			noisy spectra	94	30	amphibole
	JS-NGO-01s	NGO-HM1	63-125	4733	Edenite	0.0986	good_hit	94	55	amphibole
	JS-NGO-01s	NGO-HM1	63-125	4734	Diopside	0.0412	good_hit	98	49	orthopyroxene
	JS-NGO-01s	NGO-HM1	63-125	4735	Phlogopite	0.2355	medium_hit	92	43	phyllosilicate
	JS-NGO-01s	NGO-HM1	63-125	4736	Enstatite	0.0558	good_hit	100	93	orthopyroxene
	JS-NGO-01s	NGO-HM1	63-125	4737	Almandine	0.0507	good_hit	118	118	garnet
	JS-NGO-01s	NGO-HM1	63-125	4738	Amphibole	0.0488	good_hit	89	27	amphibole
	JS-NGO-01s	NGO-HM1	63-125	4739	Pyrope	0.0325	good_hit	101	24	garnet
	JS-NGO-01s	NGO-HM1	63-125	4740	Fluorapatite	0.175	medium_hit	78	92	apatite
	JS-NGO-01s	NGO-HM1	63-125	4741	Diopside	0.0554	good_hit	92	34	clinopyroxene
	JS-NGO-01s	NGO-HM1	63-125	4742	Pyrope	0.0327	good_hit	114	71	garnet
	JS-NGO-01s	NGO-HM1	63-125	4743	Edenite	0.0448	good_hit	87	15	amphibole
	JS-NGO-01s	NGO-HM1	63-125	4744	Fluorapatite	0.0902	good_hit	85	122	apatite
	JS-NGO-01s	NGO-HM1	63-125	4745	Annite	0.3025	no_hit	94	8	amphibole
	JS-NGO-01s	NGO-HM1	63-125	4746	Ferrosilite	0.0305	good_hit	107	94	orthopyroxene
	JS-NGO-01s	NGO-HM1	63-125	4747	Amphibole	0.1295	good_hit	97	33	amphibole
	JS-NGO-01s	NGO-HM1	63-125	4748	Fluorapatite	0.0501	good_hit	90	136	apatite
	JS-NGO-01s	NGO-HM1	63-125	4749	Amphibole	0.1138	good_hit	92	14	amphibole
	JS-NGO-01s	NGO-HM1	63-125	4750	Enstatite	0.0617	good_hit	104	76	orthopyroxene
	JS-NGO-01s	NGO-HM1	63-125	4751	Fluorapatite	0.1209	good_hit	85	123	apatite
	JS-NGO-01s	NGO-HM1	63-125	4752	Amphibole	0.1136	good_hit	93	10	amphibole
	JS-NGO-01s	NGO-HM1	63-125	4753	Diopside	0.0502	good_hit	93	98	clinopyroxene
	JS-NGO-01s	NGO-HM1	63-125	4754	Pyrope	0.0312	good_hit	113	187	garnet
	JS-NGO-01s	NGO-HM1	63-125	4755	Edenite	0.111	good_hit	82	101	amphibole
	JS-NGO-01s	NGO-HM1	63-125	4756	Edenite	0.0975	good_hit	80	21	amphibole
	JS-NGO-01s	NGO-HM1	63-125	4757	Magnetite	0.0101	good_hit	255	4	opaque
	JS-NGO-01s	NGO-HM1	63-125	4758	Sillimanite	0.0178	good_hit	92	83	sillimanite
	JS-NGO-01s	NGO-HM1	63-125	4759	Edenite	0.1495	good_hit	97	67	amphibole
	JS-NGO-01s	NGO-HM1	63-125	4760	Ferrosilite	0.027	good_hit	87	52	orthopyroxene
	JS-NGO-01s	NGO-HM1	63-125	4761	Fluorapatite	0.0642	good_hit	81	80	apatite
	JS-NGO-01s	NGO-HM1	63-125	4762	Augite	0.0811	good_hit	97	60	clinopyroxene
	JS-NGO-01s	NGO-HM1	63-125	4763	Actinolite	0.1083	good_hit	91	66	amphibole
	JS-NGO-01s	NGO-HM1	63-125	4764	Edenite	0.1018	good_hit	94	7	amphibole
	JS-NGO-01s	NGO-HM1	63-125	4765	Amphibole	0.1012	good_hit	93	59	amphibole
	JS-NGO-01s	NGO-HM1	63-125	4766	Pyrope	0.0386	good_hit	121	92	garnet
	JS-NGO-01s	NGO-HM1	63-125	4767	Nadorite	0.2266	ungrouped	246	4	opaque
	JS-NGO-01s	NGO-HM1	63-125	4768	Amphibole	0.2061	medium_hit	98	5	amphibole
	JS-NGO-01s	NGO-HM1	63-125	4769	Amphibole	0.1159	good_hit	96	39	amphibole
	JS-NGO-01s	NGO-HM1	63-125	4770	Quartz	0.0273	good_hit	72	115	quartz
	JS-NGO-01s	NGO-HM1	63-125	4771	Actinolite	0.0731	good_hit	88	73	amphibole
	JS-NGO-01s	NGO-HM1	63-125	4772	Diopside	0.0803	good_hit	98	99	orthopyroxene
	JS-NGO-01s	NGO-HM1	63-125	4773	Amphibole	0.15	medium_hit	97	13	amphibole
	JS-NGO-01s	NGO-HM1	63-125	4774	Amphibole	0.2073	medium_hit	97	12	amphibole
	JS-NGO-01s	NGO-HM1	63-125	4775	Rutile	0.0509	good_hit	255	8	rutile
	JS-NGO-01s	NGO-HM1	63-125	4776	Ferrosilite	0.0527	good_hit	104	18	orthopyroxene
	JS-NGO-01s	NGO-HM1	63-125	4777	Diopside	0.2144	medium_hit	101	86	clinopyroxene
	JS-NGO-01s	NGO-HM1	63-125	4778	Spessartine	0.0722	good_hit	120	166	garnet
	JS-NGO-01s	NGO-HM1	63-125	4779	Pyrope	0.0349	good_hit	115	174	garnet
	JS-NGO-01s	NGO-HM1	63-125	4780	Sillimanite	0.1065	good_hit	106	33	sillimanite
	JS-NGO-01s	NGO-HM1	63-125	4781	Amphibole	0.3597	no_hit	81	7	amphibole
	JS-NGO-01s	NGO-HM1	63-125	4782	Enstatite	0.0468	good_hit	105	95	orthopyroxene
	JS-NGO-01s	NGO-HM1	63-125	4783	Edenite	0.2179	medium_hit	102	7	amphibole
	JS-NGO-01s	NGO-HM1	63-125	4784	Edenite	0.0524	good_hit	91	23	amphibole
	JS-NGO-01s	NGO-HM1	63-125	4785	Enstatite	0.057	good_hit	91	181	orthopyroxene
	JS-NGO-01s	NGO-HM1	63-125	4786	Pyrope	0.0224	good_hit	117	110	garnet
	JS-NGO-01s	NGO-HM1	63-125	4787	Fluorapatite	0.145	good_hit	89	69	apatite
	JS-NGO-01s	NGO-HM1	63-125	4788	Annite	0.2695	medium_hit	96	14	amphibole
	JS-NGO-01s	NGO-HM1	63-125	4789	Edenite	0.1193	good_hit	99	8	amphibole
	JS-NGO-01s	NGO-HM1	63-125	4790	Enstatite	0.0358	good_hit	99	158	orthopyroxene
	JS-NGO-01s	NGO-HM1	63-125	4791	Enstatite	0.0548	good_hit	96	79	orthopyroxene
	JS-NGO-01s	NGO-HM1	63-125	4792	Diopside	0.0699	good_hit	94	99	clinopyroxene
	JS-NGO-01s	NGO-HM1	63-125	4793	Amphibole	0.1583	medium_hit	84	11	amphibole
	JS-NGO-01s	NGO-HM1	63-125	4794	Ferrosilite	0.0557	good_hit	100	47	orthopyroxene
	JS-NGO-01s	NGO-HM1	63-125	4795			noisy spectra	60	8	phyllosilicate
	JS-NGO-01s	NGO-HM1	63-125	4796	Clinozoisite	0.1267	good_hit	103	8	epidote
	JS-NGO-01s	NGO-HM1	63-125	4797	Pyrope	0.0235	good_hit	112	109	garnet
	JS-NGO-01s	NGO-HM1	63-125	4798	Enstatite	0.0761	good_hit	101	99	orthopyroxene
	JS-NGO-01s	NGO-HM1	63-125	4799	Diopside	0.0518	good_hit	107	100	orthopyroxene
	JS-NGO-01s	NGO-HM1	63-125	4800	Ferrosilite	0.0204	good_hit	103	73	orthopyroxene
	JS-NGO-01s	NGO-HM1	63-125	4801	Pyrope	0.0632	good_hit	117	101	garnet
	JS-NGO-01s	NGO-HM1	63-125	4802	Ferrosilite	0.0515	good_hit	112	25	orthopyroxene
	JS-NGO-01s	NGO-HM1	63-125	4803	Amphibole	0.1126	good_hit	102	55	amphibole
	JS-NGO-01s	NGO-HM1	63-125	4804	Amphibole	0.2015	medium_hit	96	22	amphibole
	JS-NGO-01s	NGO-HM1	63-125	4805	Diopside	0.0545	good_hit	109	120	clinopyroxene
	JS-NGO-01s	NGO-HM1	63-125	4806	Enstatite	0.0424	good_hit	103	33	orthopyroxene
	JS-NGO-01s	NGO-HM1	63-125	4807	Pyrope	0.0261	good_hit	122	112	garnet
	JS-NGO-01s	NGO-HM1	63-125	4808	Enstatite	0.0528	good_hit	104	95	orthopyroxene
	JS-NGO-01s	NGO-HM1	63-125	4809	Lopezite	0.1745	ungrouped	111	13	not_identified
	JS-NGO-01s	NGO-HM1	63-125	4810	Lazurite	0.7743	no_hit	90	32	not_identified
	JS-NGO-01s	NGO-HM1	63-125	4811	Edenite	0.1012	good_hit	100	16	amphibole
	JS-NGO-01s	NGO-HM1	63-125	4812	Amphibole	0.1427	good_hit	93	24	amphibole
	JS-NGO-01s	NGO-HM1	63-125	4813	Amphibole	0.2005	medium_hit	97	7	amphibole
	JS-NGO-01s	NGO-HM1	63-125	4814	Almandine	0.0461	good_hit	103	20	garnet
	JS-NGO-01s	NGO-HM1	63-125	4815	Edenite	0.1678	medium_hit	97	13	amphibole
	JS-NGO-01s	NGO-HM1	63-125	4816	Almandine	0.0453	good_hit	122	112	garnet
	JS-NGO-01s	NGO-HM1	63-125	4817	Annite	0.2523	medium_hit	96	11	amphibole
	JS-NGO-01s	NGO-HM1	63-125	4818			noisy spectra	100	13	not_identified
	JS-NGO-01s	NGO-HM1	63-125	4819	Augite	0.0363	good_hit	82	45	clinopyroxene
	JS-NGO-01s	NGO-HM1	63-125	4820	Amphibole	0.2046	medium_hit	99	5	amphibole
	JS-NGO-01s	NGO-HM1	63-125	4821	Amphibole	0.1472	good_hit	94	18	amphibole
	JS-NGO-01s	NGO-HM1	63-125	4822	Ferrosilite	0.0488	good_hit	109	134	orthopyroxene
	JS-NGO-01s	NGO-HM1	63-125	4823	Almandine	0.1055	good_hit	115	25	garnet
	JS-NGO-01s	NGO-HM1	63-125	4824	Edenite	0.1069	good_hit	81	11	amphibole
	JS-NGO-01s	NGO-HM1	63-125	4825	Enstatite	0.0488	good_hit	95	37	orthopyroxene
	JS-NGO-01s	NGO-HM1	63-125	4826	Amphibole	0.2798	medium_hit	97	60	amphibole
	JS-NGO-01s	NGO-HM1	63-125	4827	Fluorapatite	0.0673	good_hit	85	138	apatite
	JS-NGO-01s	NGO-HM1	63-125	4828	Almandine	0.0422	good_hit	116	62	garnet
	JS-NGO-01s	NGO-HM1	63-125	4829	Amphibole	0.1007	good_hit	88	76	amphibole
	JS-NGO-01s	NGO-HM1	63-125	4830	Augite	0.0501	good_hit	97	22	clinopyroxene
	JS-NGO-01s	NGO-HM1	63-125	4831	Quartz	0.0285	good_hit	74	128	quartz
	JS-NGO-01s	NGO-HM1	63-125	4832	Enstatite	0.0371	good_hit	106	54	orthopyroxene
	JS-NGO-01s	NGO-HM1	63-125	4833	Diopside	0.0452	good_hit	109	116	orthopyroxene
	JS-NGO-01s	NGO-HM1	63-125	4834	Annite	0.3538	no_hit	101	5	amphibole
	JS-NGO-01s	NGO-HM1	63-125	4835	Pyrope	0.0309	good_hit	124	78	garnet
	JS-NGO-01s	NGO-HM1	63-125	4836	Amphibole	0.1865	medium_hit	94	5	amphibole
	JS-NGO-01s	NGO-HM1	63-125	4837	Almandine	0.0832	good_hit	120	103	garnet
	JS-NGO-01s	NGO-HM1	63-125	4838	Almandine	0.0667	good_hit	122	114	garnet
	JS-NGO-01s	NGO-HM1	63-125	4839	Enstatite	0.0435	good_hit	105	143	orthopyroxene
	JS-NGO-01s	NGO-HM1	63-125	4840	Amphibole	0.1454	good_hit	91	11	amphibole
	JS-NGO-01s	NGO-HM1	63-125	4841	Diopside	0.0522	good_hit	98	49	clinopyroxene
	JS-NGO-01s	NGO-HM1	63-125	4842	Enstatite	0.0717	good_hit	103	76	orthopyroxene
	JS-NGO-01s	NGO-HM1	63-125	4843	Amphibole	0.0901	good_hit	97	47	amphibole
	JS-NGO-01s	NGO-HM1	63-125	4844	Ferrosilite	0.0333	good_hit	102	19	orthopyroxene
	JS-NGO-01s	NGO-HM1	63-125	4845	Fluorapatite	0.1076	good_hit	94	101	apatite
	JS-NGO-01s	NGO-HM1	63-125	4846	Pyrope	0.0374	good_hit	117	96	garnet
	JS-NGO-01s	NGO-HM1	63-125	4847	Ferrosilite	0.0365	good_hit	100	26	orthopyroxene
	JS-NGO-01s	NGO-HM1	63-125	4848	Almandine	0.0397	good_hit	122	84	garnet
	JS-NGO-01s	NGO-HM1	63-125	4849	Amphibole	0.1125	good_hit	89	29	amphibole
	JS-NGO-01s	NGO-HM1	63-125	4850	Enstatite	0.0432	good_hit	102	80	orthopyroxene
	JS-NGO-01s	NGO-HM1	63-125	4851	Ferrosilite	0.0767	good_hit	98	94	orthopyroxene
	JS-NGO-01s	NGO-HM1	63-125	4852			noisy spectra	104	68	clinopyroxene
	JS-NGO-01s	NGO-HM1	63-125	4853	Diopside	0.0789	good_hit	102	75	clinopyroxene
	JS-NGO-01s	NGO-HM1	63-125	4854	Amphibole	0.3106	no_hit	96	9	amphibole
	JS-NGO-01s	NGO-HM1	63-125	4855	Enstatite	0.0528	good_hit	103	96	orthopyroxene
	JS-NGO-01s	NGO-HM1	63-125	4856	Augite	0.0893	good_hit	90	38	clinopyroxene
	JS-NGO-01s	NGO-HM1	63-125	4857	Enstatite	0.0384	good_hit	89	74	orthopyroxene
	JS-NGO-01s	NGO-HM1	63-125	4858	Enstatite	0.029	good_hit	95	100	orthopyroxene
	JS-NGO-01s	NGO-HM1	63-125	4859	Pyrope	0.0315	good_hit	122	66	garnet
	JS-NGO-01s	NGO-HM1	63-125	4860	Amphibole	0.2091	medium_hit	96	10	amphibole
	JS-NGO-01s	NGO-HM1	63-125	4861	Amphibole	0.1179	good_hit	90	8	amphibole
	JS-NGO-01s	NGO-HM1	63-125	4862	Amphibole	0.2834	medium_hit	96	11	amphibole
	JS-NGO-01s	NGO-HM1	63-125	4863	Diopside	0.0404	good_hit	95	75	clinopyroxene
	JS-NGO-01s	NGO-HM1	63-125	4864	Annite	0.3145	no_hit	97	5	amphibole
	JS-NGO-01s	NGO-HM1	63-125	4865	Pyrope	0.0327	good_hit	120	110	garnet
	JS-NGO-01s	NGO-HM1	63-125	4866	Almandine	0.0474	good_hit	117	99	garnet
	JS-NGO-01s	NGO-HM1	63-125	4867	Almandine	0.056	good_hit	120	83	garnet
	JS-NGO-01s	NGO-HM1	63-125	4868	Zircon	0.1107	good_hit	145	27	zircon
	JS-NGO-01s	NGO-HM1	63-125	4869	Amphibole	0.2568	medium_hit	100	12	amphibole
	JS-NGO-01s	NGO-HM1	63-125	4870	Ferrosilite	0.047	good_hit	98	33	orthopyroxene
	JS-NGO-01s	NGO-HM1	63-125	4871	Amphibole	0.1329	good_hit	92	10	amphibole
	JS-NGO-01s	NGO-HM1	63-125	4872	Annite	0.3025	no_hit	88	19	amphibole
	JS-NGO-01s	NGO-HM1	63-125	4873	Pargasite	0.3016	no_hit	94	21	amphibole
	JS-NGO-01s	NGO-HM1	63-125	4874	Ilmenite	0.3056	no_hit	254	5	opaque
	JS-NGO-01s	NGO-HM1	63-125	4875	Annite	0.2822	medium_hit	91	7	amphibole
	JS-NGO-01s	NGO-HM1	63-125	4876	Amphibole	0.1031	good_hit	96	21	amphibole
	JS-NGO-01s	NGO-HM1	63-125	4877	Amphibole	0.1857	medium_hit	96	5	amphibole
	JS-NGO-01s	NGO-HM1	63-125	4878	Enstatite	0.0652	good_hit	109	115	orthopyroxene
	JS-NGO-01s	NGO-HM1	63-125	4879	Hematite	0.2649	medium_hit	251	8	opaque
	JS-NGO-01s	NGO-HM1	63-125	4880	Amphibole	0.3029	no_hit	96	7	amphibole
	JS-NGO-01s	NGO-HM1	63-125	4881	Edenite	0.0916	good_hit	96	9	amphibole
	JS-NGO-01s	NGO-HM1	63-125	4882	Diopside	0.0788	good_hit	105	77	clinopyroxene
	JS-NGO-01s	NGO-HM1	63-125	4883	Edenite	0.1379	good_hit	84	42	amphibole
	JS-NGO-01s	NGO-HM1	63-125	4884	Amphibole	0.0518	good_hit	85	17	amphibole
	JS-NGO-01s	NGO-HM1	63-125	4885	Amphibole	0.1005	good_hit	96	9	amphibole
	JS-NGO-01s	NGO-HM1	63-125	4886	Amphibole	0.2396	medium_hit	96	8	amphibole
	JS-NGO-01s	NGO-HM1	63-125	4887			noisy spectra	108	61	clinopyroxene
	JS-NGO-01s	NGO-HM1	63-125	4888	Diopside	0.076	good_hit	101	26	clinopyroxene
	JS-NGO-01s	NGO-HM1	63-125	4889	Fluorapatite	0.0494	good_hit	90	113	apatite
	JS-NGO-01s	NGO-HM1	63-125	4890	Amphibole	0.0843	good_hit	94	14	amphibole
	JS-NGO-01s	NGO-HM1	63-125	4891	Enstatite	0.0399	good_hit	106	131	orthopyroxene
	JS-NGO-01s	NGO-HM1	63-125	4892	Enstatite	0.0333	good_hit	108	76	orthopyroxene
	JS-NGO-01s	NGO-HM1	63-125	4893	Amphibole	0.1624	medium_hit	96	8	amphibole
	JS-NGO-01s	NGO-HM1	63-125	4894	Enstatite	0.0522	good_hit	106	121	orthopyroxene
	JS-NGO-01s	NGO-HM1	63-125	4895	Pyrope	0.031	good_hit	119	72	garnet
	JS-NGO-01s	NGO-HM1	63-125	4896	Pyrope	0.0394	good_hit	113	97	garnet
	JS-NGO-01s	NGO-HM1	63-125	4897	Diopside	0.0505	good_hit	107	13	orthopyroxene
	JS-NGO-01s	NGO-HM1	63-125	4898	Pyrope	0.0438	good_hit	109	93	garnet
	JS-NGO-01s	NGO-HM1	63-125	4899	Edenite	0.1743	medium_hit	94	32	amphibole
	JS-NGO-01s	NGO-HM1	63-125	4900	Edenite	0.2022	medium_hit	95	8	amphibole
	JS-NGO-01s	NGO-HM1	63-125	4901	Sillimanite	0.0497	good_hit	93	107	sillimanite
	JS-NGO-01s	NGO-HM1	63-125	4902	Ferrosilite	0.0539	good_hit	103	130	orthopyroxene
	JS-NGO-01s	NGO-HM1	63-125	4903	Enstatite	0.0582	good_hit	100	20	orthopyroxene
	JS-NGO-01s	NGO-HM1	63-125	4904	Amphibole	0.1322	good_hit	98	8	amphibole
	JS-NGO-01s	NGO-HM1	63-125	4905	Enstatite	0.1164	good_hit	100	89	orthopyroxene
	JS-NGO-01s	NGO-HM1	63-125	4906	Enstatite	0.062	good_hit	112	148	orthopyroxene
	JS-NGO-01s	NGO-HM1	63-125	4907	Actinolite	0.1337	good_hit	84	32	amphibole
	JS-NGO-01s	NGO-HM1	63-125	4908	Sillimanite	0.0424	good_hit	97	70	sillimanite
	JS-NGO-01s	NGO-HM1	63-125	4909	Amphibole	0.1662	medium_hit	97	7	amphibole
	JS-NGO-01s	NGO-HM1	63-125	4910	Amphibole	0.1931	medium_hit	97	21	amphibole
	JS-NGO-01s	NGO-HM1	63-125	4911	Pyrope	0.0301	good_hit	120	50	garnet
	JS-NGO-01s	NGO-HM1	63-125	4912	Pyrope	0.0473	good_hit	118	99	garnet
	JS-NGO-01s	NGO-HM1	63-125	4913	Diopside	0.0395	good_hit	96	51	orthopyroxene
	JS-NGO-01s	NGO-HM1	63-125	4914	Spessartine	0.064	good_hit	120	125	garnet
	JS-NGO-01s	NGO-HM1	63-125	4915	Almandine	0.0474	good_hit	121	92	garnet
	JS-NGO-01s	NGO-HM1	63-125	4916	Ferrosilite	0.0481	good_hit	106	106	orthopyroxene
	JS-NGO-01s	NGO-HM1	63-125	4917	Enstatite	0.1317	good_hit	103	10	orthopyroxene
	JS-NGO-01s	NGO-HM1	63-125	4918	Pargasite	0.117	good_hit	87	41	amphibole
	JS-NGO-01s	NGO-HM1	63-125	4919	Ilmenite	0.2413	medium_hit	244	5	opaque
	JS-NGO-01s	NGO-HM1	63-125	4920	Edenite	0.0724	good_hit	86	7	amphibole
	JS-NGO-01s	NGO-HM1	63-125	4921	Diopside	0.0372	good_hit	85	13	clinopyroxene
	JS-NGO-01s	NGO-HM1	63-125	4922	Quartz	0.0138	good_hit	60	93	quartz
	JS-NGO-01s	NGO-HM1	63-125	4923	Enstatite	0.0411	good_hit	100	25	orthopyroxene
	JS-NGO-01s	NGO-HM1	63-125	4924	Diopside	0.0701	good_hit	105	50	clinopyroxene
	JS-NGO-01s	NGO-HM1	63-125	4925	Enstatite	0.0972	good_hit	106	93	orthopyroxene
	JS-NGO-01s	NGO-HM1	63-125	4926	Amphibole	0.1289	good_hit	89	15	amphibole
	JS-NGO-01s	NGO-HM1	63-125	4927	Amphibole	0.1093	good_hit	95	7	amphibole
	JS-NGO-01s	NGO-HM1	63-125	4928	Tyrrellite	0.281	ungrouped	232	4	opaque
	JS-NGO-01s	NGO-HM1	63-125	4929	Pargasite	0.3121	no_hit	99	4	amphibole
	JS-NGO-01s	NGO-HM1	63-125	4930	Ferrosilite	0.065	good_hit	97	39	orthopyroxene
	JS-NGO-01s	NGO-HM1	63-125	4931	Diopside	0.0378	good_hit	101	11	orthopyroxene
	JS-NGO-01s	NGO-HM1	63-125	4932	Diopside	0.0494	good_hit	100	37	clinopyroxene
	JS-NGO-01s	NGO-HM1	63-125	4933	Fluorapatite	0.0954	good_hit	88	31	apatite
	JS-NGO-01s	NGO-HM1	63-125	4934	Amphibole	0.1145	good_hit	95	12	amphibole
	JS-NGO-01s	NGO-HM1	63-125	4935	Pyrope	0.0328	good_hit	122	67	garnet
	JS-NGO-01s	NGO-HM1	63-125	4936	Amphibole	0.1003	good_hit	91	35	amphibole
	JS-NGO-01s	NGO-HM1	63-125	4937	Augite	0.0577	good_hit	102	62	clinopyroxene
	JS-NGO-01s	NGO-HM1	63-125	4938	Edenite	0.0637	good_hit	96	55	amphibole
	JS-NGO-01s	NGO-HM1	63-125	4939	Enstatite	0.095	good_hit	110	24	orthopyroxene
	JS-NGO-01s	NGO-HM1	63-125	4940	Diopside	0.0387	good_hit	104	14	orthopyroxene
	JS-NGO-01s	NGO-HM1	63-125	4941	Annite	0.2345	medium_hit	96	8	amphibole
	JS-NGO-01s	NGO-HM1	63-125	4942	Spessartine	0.056	good_hit	118	90	garnet
	JS-NGO-01s	NGO-HM1	63-125	4943	Enstatite	0.0731	good_hit	104	74	orthopyroxene
	JS-NGO-01s	NGO-HM1	63-125	4944	Pyrope	0.0458	good_hit	107	16	garnet
	JS-NGO-01s	NGO-HM1	63-125	4945	Pyrope	0.0322	good_hit	110	99	garnet
	JS-NGO-01s	NGO-HM1	63-125	4946	Enstatite	0.0377	good_hit	91	18	orthopyroxene
	JS-NGO-01s	NGO-HM1	63-125	4947			noisy spectra	87	79	orthopyroxene
	JS-NGO-01s	NGO-HM1	63-125	4948	Diopside	0.1069	good_hit	97	74	clinopyroxene
	JS-NGO-01s	NGO-HM1	63-125	4949	Enstatite	0.0445	good_hit	103	90	orthopyroxene
	JS-NGO-01s	NGO-HM1	63-125	4950	Titanite	0.4207	no_hit	161	116	titanite
	JS-NGO-01s	NGO-HM1	63-125	4951	Chlorartinite	0.8307	ungrouped	22	114	not_identified
	JS-NGO-01s	NGO-HM1	63-125	4952	JahnsiteCaMnMn	0.8601	ungrouped	21	112	not_identified
	JS-NGO-01s	NGO-HM1	63-125	4953	Edenite	0.0845	good_hit	97	8	amphibole
	JS-NGO-01s	NGO-HM1	63-125	4954			noisy spectra	86	9	not_identified
	JS-NGO-01s	NGO-HM1	63-125	4955	Piemontite	0.7057	no_hit	21	17	not_identified
	JS-NGO-01s	NGO-HM1	63-125	4956	JahnsiteCaMnMn	0.8881	ungrouped	18	45	not_identified
	JS-NGO-01s	NGO-HM1	63-125	4957	Chlorartinite	0.8981	ungrouped	111	12	not_identified
	JS-NGO-01s	NGO-HM1	63-125	4958	Epidote	0.2988	medium_hit	107	120	epidote
	JS-NGO-01s	NGO-HM1	63-125	4959	Edenite	0.1879	medium_hit	95	19	amphibole
	JS-NGO-01s	NGO-HM1	63-125	4960	Fluorapatite	0.154	medium_hit	93	114	apatite
	JS-NGO-01s	NGO-HM1	63-125	4961	Amphibole	0.1485	good_hit	96	25	amphibole
	JS-NGO-01s	NGO-HM1	63-125	4962	Edenite	0.0565	good_hit	97	11	amphibole
	JS-NGO-01s	NGO-HM1	63-125	4963	Ilmenite	0.2721	medium_hit	254	7	opaque
	JS-NGO-01s	NGO-HM1	63-125	4964	Edenite	0.1059	good_hit	77	13	amphibole
	JS-NGO-01s	NGO-HM1	63-125	4965	Pyrope	0.051	good_hit	123	76	garnet
	JS-NGO-01s	NGO-HM1	63-125	4966	Amphibole	0.0764	good_hit	99	39	amphibole
	JS-NGO-01s	NGO-HM1	63-125	4967	Anorthite	0.1471	good_hit	71	36	feldspar
	JS-NGO-01s	NGO-HM1	63-125	4968	Amphibole	0.2363	medium_hit	91	13	amphibole
	JS-NGO-01s	NGO-HM1	63-125	4969	Ferrosilite	0.0269	good_hit	108	116	orthopyroxene
	JS-NGO-01s	NGO-HM1	63-125	4970	Pyrope	0.0436	good_hit	120	50	garnet
	JS-NGO-01s	NGO-HM1	63-125	4971	Pyrope	0.0279	good_hit	119	73	garnet
	JS-NGO-01s	NGO-HM1	63-125	4972	Pargasite	0.2611	medium_hit	92	5	amphibole
	JS-NGO-01s	NGO-HM1	63-125	4973	Annite	0.3102	no_hit	85	7	amphibole
	JS-NGO-01s	NGO-HM1	63-125	4974	Pyrope	0.0519	good_hit	102	232	garnet
	JS-NGO-01s	NGO-HM1	63-125	4975	Pyrope	0.033	good_hit	119	30	garnet
	JS-NGO-01s	NGO-HM1	63-125	4976	Pyrope	0.0316	good_hit	106	70	garnet
	JS-NGO-01s	NGO-HM1	63-125	4977	Pyrope	0.0456	good_hit	122	76	garnet
	JS-NGO-01s	NGO-HM1	63-125	4978	Pyrope	0.0268	good_hit	122	142	garnet
	JS-NGO-01s	NGO-HM1	63-125	4979	Enstatite	0.05	good_hit	102	122	orthopyroxene
	JS-NGO-01s	NGO-HM1	63-125	4980	Spessartine	0.0578	good_hit	122	71	garnet
	JS-NGO-01s	NGO-HM1	63-125	4981	Diopside	0.036	good_hit	103	104	clinopyroxene
	JS-NGO-01s	NGO-HM1	63-125	4982	Enstatite	0.0682	good_hit	92	53	orthopyroxene
	JS-NGO-01s	NGO-HM1	63-125	4983	Augite	0.0894	good_hit	99	45	clinopyroxene
	JS-NGO-01s	NGO-HM1	63-125	4984	Spessartine	0.2088	medium_hit	115	126	garnet
	JS-NGO-01s	NGO-HM1	63-125	4985	Sillimanite	0.0648	good_hit	97	193	sillimanite
	JS-NGO-01s	NGO-HM1	63-125	4986	Ferrosilite	0.0493	good_hit	106	64	orthopyroxene
	JS-NGO-01s	NGO-HM1	63-125	4987	Amphibole	0.4294	no_hit	92	6	amphibole
	JS-NGO-01s	NGO-HM1	63-125	4988	Pyrope	0.0366	good_hit	119	98	garnet
	JS-NGO-01s	NGO-HM1	63-125	4989	Augite	0.0573	good_hit	103	54	clinopyroxene
	JS-NGO-01s	NGO-HM1	63-125	4990	Edenite	0.0979	good_hit	101	12	amphibole
	JS-NGO-01s	NGO-HM1	63-125	4991	Almandine	0.0512	good_hit	120	76	garnet
	JS-NGO-01s	NGO-HM1	63-125	4992	Enstatite	0.0658	good_hit	103	40	orthopyroxene
	JS-NGO-01s	NGO-HM1	63-125	4993	Almandine	0.0486	good_hit	121	96	garnet
	JS-NGO-01s	NGO-HM1	63-125	4994	Pyrope	0.0391	good_hit	121	240	garnet
	JS-NGO-01s	NGO-HM1	63-125	4995	Almandine	0.0469	good_hit	104	103	garnet
	JS-NGO-01s	NGO-HM1	63-125	4996	GersdorffiteP213	0.3106	ungrouped	194	7	amphibole
	JS-NGO-01s	NGO-HM1	63-125	4997	Amphibole	0.191	medium_hit	84	13	amphibole
	JS-NGO-01s	NGO-HM1	63-125	4998	Enstatite	0.0713	good_hit	95	58	orthopyroxene
	JS-NGO-01s	NGO-HM1	63-125	4999	Pyrope	0.0263	good_hit	119	114	garnet
	JS-NGO-01s	NGO-HM1	63-125	5000	Quartz	0.0359	good_hit	75	130	quartz
	JS-NGO-01s	NGO-HM1	63-125	5001	Diopside	0.0736	good_hit	104	79	clinopyroxene
	JS-NGO-01s	NGO-HM1	63-125	5002	Augite	0.0485	good_hit	102	64	clinopyroxene
	JS-NGO-01s	NGO-HM1	63-125	5003	Ferrosilite	0.0512	good_hit	111	13	orthopyroxene
	JS-NGO-01s	NGO-HM1	63-125	5004	Lorenzenite	0.4935	no_hit	143	16	not_identified
	JS-NGO-01s	NGO-HM1	63-125	5005	Edenite	0.051	good_hit	90	19	amphibole
	JS-NGO-01s	NGO-HM1	63-125	5006	Pyrope	0.0326	good_hit	121	128	garnet
	JS-NGO-01s	NGO-HM1	63-125	5007	Diopside	0.0572	good_hit	106	75	orthopyroxene
	JS-NGO-01s	NGO-HM1	63-125	5008	Pyrope	0.0405	good_hit	114	90	garnet
	JS-NGO-01s	NGO-HM1	63-125	5009	Almandine	0.0533	good_hit	114	29	garnet
	JS-NGO-01s	NGO-HM1	63-125	5010	Fluorapatite	0.0621	good_hit	92	124	apatite
	JS-NGO-01s	NGO-HM1	63-125	5011	Enstatite	0.0551	good_hit	106	100	orthopyroxene
	JS-NGO-01s	NGO-HM1	63-125	5012	Pyrope	0.0251	good_hit	120	90	garnet
	JS-NGO-01s	NGO-HM1	63-125	5013	Annite	0.3014	no_hit	99	8	amphibole
	JS-NGO-01s	NGO-HM1	63-125	5014	Annite	0.2925	medium_hit	102	5	amphibole
	JS-NGO-01s	NGO-HM1	63-125	5015	Pyrope	0.035	good_hit	114	84	garnet
	JS-NGO-01s	NGO-HM1	63-125	5016	Amphibole	0.1716	medium_hit	91	23	amphibole
	JS-NGO-01s	NGO-HM1	63-125	5017	Quartz	0.0338	good_hit	63	13	quartz
	JS-NGO-01s	NGO-HM1	63-125	5018	Amphibole	0.1058	good_hit	96	15	amphibole
	JS-NGO-01s	NGO-HM1	63-125	5019	Almandine	0.0439	good_hit	122	180	garnet
	JS-NGO-01s	NGO-HM1	63-125	5020	Diopside	0.0471	good_hit	96	72	orthopyroxene
	JS-NGO-01s	NGO-HM1	63-125	5021	Augite	0.0648	good_hit	103	75	clinopyroxene
	JS-NGO-01s	NGO-HM1	63-125	5022	Edenite	0.082	good_hit	94	27	amphibole
	JS-NGO-01s	NGO-HM1	63-125	5023	Edenite	0.0602	good_hit	89	41	amphibole
	JS-NGO-01s	NGO-HM1	63-125	5024	Amphibole	0.2571	medium_hit	92	33	amphibole
	JS-NGO-01s	NGO-HM1	63-125	5025	Almandine	0.0432	good_hit	115	89	garnet
	JS-NGO-01s	NGO-HM1	63-125	5026	Edenite	0.113	good_hit	91	30	amphibole
	JS-NGO-01s	NGO-HM1	63-125	5027	Actinolite	0.0854	good_hit	97	41	amphibole
	JS-NGO-01s	NGO-HM1	63-125	5028	Fluorapatite	0.096	good_hit	90	127	apatite
	JS-NGO-01s	NGO-HM1	63-125	5029	Diopside	0.0657	good_hit	99	52	clinopyroxene
	JS-NGO-01s	NGO-HM1	63-125	5030	Enstatite	0.0382	good_hit	106	69	orthopyroxene
	JS-NGO-01s	NGO-HM1	63-125	5031	Enstatite	0.0933	good_hit	82	88	orthopyroxene
	JS-NGO-01s	NGO-HM1	63-125	5032	Enstatite	0.1219	good_hit	99	150	orthopyroxene
	JS-NGO-01s	NGO-HM1	63-125	5033	Diopside	0.0664	good_hit	101	112	clinopyroxene
	JS-NGO-01s	NGO-HM1	63-125	5034	Augite	0.0664	good_hit	89	97	clinopyroxene
	JS-NGO-01s	NGO-HM1	63-125	5035	Spessartine	0.0606	good_hit	111	36	garnet
	JS-NGO-01s	NGO-HM1	63-125	5036	Enstatite	0.056	good_hit	99	67	orthopyroxene
	JS-NGO-01s	NGO-HM1	63-125	5037	Pyrope	0.0413	good_hit	110	84	garnet
	JS-NGO-01s	NGO-HM1	63-125	5038	Augite	0.0774	good_hit	96	45	clinopyroxene
	JS-NGO-01s	NGO-HM1	63-125	5039	Albite	0.0983	good_hit	70	57	feldspar
	JS-NGO-01s	NGO-HM1	63-125	5040	Enstatite	0.0492	good_hit	99	97	orthopyroxene
	JS-NGO-01s	NGO-HM1	63-125	5041	Ilmenite	0.2862	medium_hit	255	5	opaque
	JS-NGO-01s	NGO-HM1	63-125	5042	Pyrope	0.0375	good_hit	114	74	garnet
	JS-NGO-01s	NGO-HM1	63-125	5043	Pyrope	0.0267	good_hit	122	139	garnet
	JS-NGO-01s	NGO-HM1	63-125	5044	Diopside	0.0657	good_hit	98	40	clinopyroxene
	JS-NGO-01s	NGO-HM1	63-125	5045	Enstatite	0.07	good_hit	99	29	orthopyroxene
	JS-NGO-01s	NGO-HM1	63-125	5046	Enstatite	0.0532	good_hit	103	75	orthopyroxene
	JS-NGO-01s	NGO-HM1	63-125	5047	Albite	0.1987	medium_hit	75	67	feldspar
	JS-NGO-01s	NGO-HM1	63-125	5048	Diopside	0.042	good_hit	103	96	clinopyroxene
	JS-NGO-01s	NGO-HM1	63-125	5049	Edenite	0.2639	medium_hit	100	10	amphibole
	JS-NGO-01s	NGO-HM1	63-125	5050	Diopside	0.0817	good_hit	101	5	clinopyroxene
	JS-NGO-01s	NGO-HM1	63-125	5051	Diopside	0.0387	good_hit	98	71	clinopyroxene
	JS-NGO-01s	NGO-HM1	63-125	5052	Enstatite	0.0575	good_hit	105	68	orthopyroxene
	JS-NGO-01s	NGO-HM1	63-125	5053	Enstatite	0.0966	good_hit	99	140	orthopyroxene
	JS-NGO-01s	NGO-HM1	63-125	5054	Amphibole	0.2432	medium_hit	97	23	amphibole
	JS-NGO-01s	NGO-HM1	63-125	5055	Edenite	0.1043	good_hit	95	18	amphibole
	JS-NGO-01s	NGO-HM1	63-125	5056	Amphibole	0.0915	good_hit	98	74	amphibole
	JS-NGO-01s	NGO-HM1	63-125	5057	Amphibole	0.1688	medium_hit	93	27	amphibole
	JS-NGO-01s	NGO-HM1	63-125	5058	Amphibole	0.1757	medium_hit	96	9	amphibole
	JS-NGO-01s	NGO-HM1	63-125	5059	Amphibole	0.2976	medium_hit	101	38	amphibole
	JS-NGO-01s	NGO-HM1	63-125	5060	Spessartine	0.05	good_hit	116	84	garnet
	JS-NGO-01s	NGO-HM1	63-125	5061	Edenite	0.1254	good_hit	94	82	amphibole
	JS-NGO-01s	NGO-HM1	63-125	5062	Diopside	0.0538	good_hit	104	63	orthopyroxene
	JS-NGO-01s	NGO-HM1	63-125	5063	Diopside	0.0622	good_hit	101	60	clinopyroxene
	JS-NGO-01s	NGO-HM1	63-125	5064	Quartz	0.0327	good_hit	65	67	quartz
	JS-NGO-01s	NGO-HM1	63-125	5065	Amphibole	0.3474	no_hit	82	15	amphibole
	JS-NGO-01s	NGO-HM1	63-125	5066	Diopside	0.0578	good_hit	84	37	clinopyroxene
	JS-NGO-01s	NGO-HM1	63-125	5067	Amphibole	0.1277	good_hit	95	8	amphibole
	JS-NGO-01s	NGO-HM1	63-125	5068	Augite	0.0791	good_hit	103	18	clinopyroxene
	JS-NGO-01s	NGO-HM1	63-125	5069	Ferrosilite	0.0361	good_hit	90	65	orthopyroxene
	JS-NGO-01s	NGO-HM1	63-125	5070	Amphibole	0.0311	good_hit	79	33	amphibole
	JS-NGO-01s	NGO-HM1	63-125	5071	Amphibole	0.073	good_hit	83	17	amphibole
	JS-NGO-01s	NGO-HM1	63-125	5072	Amphibole	0.0319	good_hit	83	56	amphibole
	JS-NGO-01s	NGO-HM1	63-125	5073	Afghanite	0.8929	no_hit	82	20	not_identified
	JS-NGO-01s	NGO-HM1	63-125	5074	Amphibole	0.1234	good_hit	89	30	amphibole
	JS-NGO-01s	NGO-HM1	63-125	5075	Amphibole	0.1107	good_hit	92	9	amphibole
	JS-NGO-01s	NGO-HM1	63-125	5076	Amphibole	0.1013	good_hit	93	26	amphibole
	JS-NGO-01s	NGO-HM1	63-125	5077	Enstatite	0.0344	good_hit	96	120	orthopyroxene
	JS-NGO-01s	NGO-HM1	63-125	5078	Enstatite	0.0606	good_hit	102	60	orthopyroxene
	JS-NGO-01s	NGO-HM1	63-125	5079	Amphibole	0.1144	good_hit	93	27	amphibole
	JS-NGO-01s	NGO-HM1	63-125	5080	Edenite	0.0963	good_hit	100	24	amphibole
	JS-NGO-01s	NGO-HM1	63-125	5081	Amphibole	0.2967	medium_hit	100	5	amphibole
	JS-NGO-01s	NGO-HM1	63-125	5082	Amphibole	0.0979	good_hit	95	15	amphibole
	JS-NGO-01s	NGO-HM1	63-125	5083	Enstatite	0.0668	good_hit	100	46	orthopyroxene
	JS-NGO-01s	NGO-HM1	63-125	5084	Enstatite	0.0705	good_hit	112	89	orthopyroxene
	JS-NGO-01s	NGO-HM1	63-125	5085	Enstatite	0.0488	good_hit	107	75	orthopyroxene
	JS-NGO-01s	NGO-HM1	63-125	5086	Pyrope	0.0388	good_hit	122	200	garnet
	JS-NGO-01s	NGO-HM1	63-125	5087			noisy spectra	96	14	not_identified
	JS-NGO-01s	NGO-HM1	63-125	5088	Ferrosilite	0.0357	good_hit	102	154	orthopyroxene
	JS-NGO-01s	NGO-HM1	63-125	5089	Enstatite	0.0657	good_hit	107	110	orthopyroxene
	JS-NGO-01s	NGO-HM1	63-125	5090	Augite	0.0439	good_hit	101	98	clinopyroxene
	JS-NGO-01s	NGO-HM1	63-125	5091	Amphibole	0.0706	good_hit	91	8	amphibole
	JS-NGO-01s	NGO-HM1	63-125	5092	Diopside	0.0572	good_hit	101	122	clinopyroxene
	JS-NGO-01s	NGO-HM1	63-125	5093	Pyrope	0.0411	good_hit	118	43	garnet
	JS-NGO-01s	NGO-HM1	63-125	5094	Ferrosilite	0.0459	good_hit	103	143	orthopyroxene
	JS-NGO-01s	NGO-HM1	63-125	5095	Edenite	0.1106	good_hit	92	19	amphibole
	JS-NGO-01s	NGO-HM1	63-125	5096	Ilmenite	0.2853	medium_hit	248	5	opaque
	JS-NGO-01s	NGO-HM1	63-125	5097	Chamosite	0.1094	good_hit	88	10	phyllosilicate
	JS-NGO-01s	NGO-HM1	63-125	5098	Ferrosilite	0.0594	good_hit	98	80	orthopyroxene
	JS-NGO-01s	NGO-HM1	63-125	5099	Fluorapatite	0.1489	good_hit	93	145	apatite
	JS-NGO-01s	NGO-HM1	63-125	5100	Amphibole	0.0899	good_hit	86	8	amphibole
	JS-NGO-01s	NGO-HM1	63-125	5101	Enstatite	0.0457	good_hit	80	105	orthopyroxene
	JS-NGO-01s	NGO-HM1	63-125	5102			noisy spectra	99	106	not_identified
	JS-NGO-01s	NGO-HM1	63-125	5103	Diopside	0.0873	good_hit	92	111	clinopyroxene
	JS-NGO-01s	NGO-HM1	63-125	5104	Diopside	0.075	good_hit	104	52	clinopyroxene
	JS-NGO-01s	NGO-HM1	63-125	5105	Enstatite	0.0374	good_hit	104	31	orthopyroxene
	JS-NGO-01s	NGO-HM1	63-125	5106	Almandine	0.021	good_hit	127	101	garnet
	JS-NGO-01s	NGO-HM1	63-125	5107	Amphibole	0.0911	good_hit	84	26	amphibole
	JS-NGO-01s	NGO-HM1	63-125	5108	Ferrosilite	0.0717	good_hit	96	19	orthopyroxene
	JS-NGO-01s	NGO-HM1	63-125	5109	Pyrope	0.0464	good_hit	112	44	garnet
	JS-NGO-01s	NGO-HM1	63-125	5110	Almandine	0.0446	good_hit	115	111	garnet
	JS-NGO-01s	NGO-HM1	63-125	5111	Diopside	0.1166	good_hit	104	118	clinopyroxene
	JS-NGO-01s	NGO-HM1	63-125	5112	Enstatite	0.0581	good_hit	105	82	orthopyroxene
	JS-NGO-01s	NGO-HM1	63-125	5113	Amphibole	0.0514	good_hit	93	11	amphibole
	JS-NGO-01s	NGO-HM1	63-125	5114	Edenite	0.0877	good_hit	93	6	amphibole
	JS-NGO-01s	NGO-HM1	63-125	5115	Ferrosilite	0.0277	good_hit	101	107	orthopyroxene
	JS-NGO-01s	NGO-HM1	63-125	5116	Diopside	0.1063	good_hit	96	11	clinopyroxene
	JS-NGO-01s	NGO-HM1	63-125	5117	Pyrope	0.046	good_hit	112	145	garnet
	JS-NGO-01s	NGO-HM1	63-125	5118	Ferrosilite	0.0324	good_hit	99	115	orthopyroxene
	JS-NGO-01s	NGO-HM1	63-125	5119	Diopside	0.0691	good_hit	101	58	clinopyroxene
	JS-NGO-01s	NGO-HM1	63-125	5120	Diopside	0.2293	medium_hit	96	21	orthopyroxene
	JS-NGO-01s	NGO-HM1	63-125	5121	Quartz	0.022	good_hit	70	19	quartz
	JS-NGO-01s	NGO-HM1	63-125	5122	Ferrosilite	0.0297	good_hit	107	80	orthopyroxene
	JS-NGO-01s	NGO-HM1	63-125	5123	Amphibole	0.3428	no_hit	97	61	amphibole
	JS-NGO-01s	NGO-HM1	63-125	5124	Almandine	0.0591	good_hit	123	43	garnet
	JS-NGO-01s	NGO-HM1	63-125	5125	Amphibole	0.3447	no_hit	100	14	amphibole
	JS-NGO-01s	NGO-HM1	63-125	5126	Annite	0.3145	no_hit	94	10	amphibole
	JS-NGO-01s	NGO-HM1	63-125	5127	Diopside	0.048	good_hit	101	40	clinopyroxene
	JS-NGO-01s	NGO-HM1	63-125	5128	Warwickite	0.2905	ungrouped	104	5	amphibole
	JS-NGO-01s	NGO-HM1	63-125	5129	Amphibole	0.0825	good_hit	94	15	amphibole
	JS-NGO-01s	NGO-HM1	63-125	5130	Amphibole	0.0827	good_hit	90	45	amphibole
	JS-NGO-01s	NGO-HM1	63-125	5131	Nadorite	0.2486	ungrouped	218	5	opaque
	JS-NGO-01s	NGO-HM1	63-125	5132	Diopside	0.0808	good_hit	103	9	clinopyroxene
	JS-NGO-01s	NGO-HM1	63-125	5133	Amphibole	0.1993	medium_hit	98	8	amphibole
	JS-NGO-01s	NGO-HM1	63-125	5134	Diopside	0.0455	good_hit	104	18	orthopyroxene
	JS-NGO-01s	NGO-HM1	63-125	5135	Edenite	0.2353	medium_hit	97	12	amphibole
	JS-NGO-01s	NGO-HM1	63-125	5136	Pyrope	0.0335	good_hit	118	69	garnet
	JS-NGO-01s	NGO-HM1	63-125	5137	Diopside	0.071	good_hit	96	44	orthopyroxene
	JS-NGO-01s	NGO-HM1	63-125	5138	Magnetite	0.0226	good_hit	251	5	opaque
	JS-NGO-01s	NGO-HM1	63-125	5139	Annite	0.3194	no_hit	87	33	amphibole
	JS-NGO-01s	NGO-HM1	63-125	5140	Augite	0.0551	good_hit	104	13	clinopyroxene
	JS-NGO-01s	NGO-HM1	63-125	5141	Diopside	0.0645	good_hit	103	114	clinopyroxene
	JS-NGO-01s	NGO-HM1	63-125	5142	Diopside	0.0891	good_hit	101	131	clinopyroxene
	JS-NGO-01s	NGO-HM1	63-125	5143	Augite	0.0659	good_hit	100	93	clinopyroxene
	JS-NGO-01s	NGO-HM1	63-125	5144	Sillimanite	0.1926	medium_hit	87	115	sillimanite
	JS-NGO-01s	NGO-HM1	63-125	5145	Edenite	0.1671	medium_hit	94	10	amphibole
	JS-NGO-01s	NGO-HM1	63-125	5146	Pyrope	0.0428	good_hit	113	95	garnet
	JS-NGO-01s	NGO-HM1	63-125	5147	Almandine	0.0456	good_hit	122	115	garnet
	JS-NGO-01s	NGO-HM1	63-125	5148	Pyrope	0.0387	good_hit	123	111	garnet
	JS-NGO-01s	NGO-HM1	63-125	5149	Spessartine	0.0594	good_hit	119	103	garnet
	JS-NGO-01s	NGO-HM1	63-125	5150	Fluorapatite	0.1361	good_hit	90	66	apatite
	JS-NGO-01s	NGO-HM1	63-125	5151	Pyrope	0.0439	good_hit	118	113	garnet
	JS-NGO-01s	NGO-HM1	63-125	5152	Hastingsite	0.3318	no_hit	101	54	amphibole
	JS-NGO-01s	NGO-HM1	63-125	5153	Amphibole	0.2692	medium_hit	87	44	amphibole
	JS-NGO-01s	NGO-HM1	63-125	5154	Annite	0.2265	medium_hit	101	14	amphibole
	JS-NGO-01s	NGO-HM1	63-125	5155	Amphibole	0.1914	medium_hit	91	13	amphibole
	JS-NGO-01s	NGO-HM1	63-125	5156	Quartz	0.0429	good_hit	72	97	quartz
	JS-NGO-01s	NGO-HM1	63-125	5157	Diopside	0.0729	good_hit	108	11	orthopyroxene
	JS-NGO-01s	NGO-HM1	63-125	5158	Amphibole	0.1146	good_hit	92	9	amphibole
	JS-NGO-01s	NGO-HM1	63-125	5159	Amphibole	0.0979	good_hit	93	46	amphibole
	JS-NGO-01s	NGO-HM1	63-125	5160	Amphibole	0.1353	good_hit	96	14	amphibole
	JS-NGO-01s	NGO-HM1	63-125	5161	Edenite	0.0705	good_hit	92	13	amphibole
	JS-NGO-01s	NGO-HM1	63-125	5162	Epidote	0.2122	medium_hit	106	49	epidote
	JS-NGO-01s	NGO-HM1	63-125	5163	Magnetite	0.026	good_hit	255	4	opaque
	JS-NGO-01s	NGO-HM1	63-125	5164	Augite	0.0457	good_hit	105	88	clinopyroxene
	JS-NGO-01s	NGO-HM1	63-125	5165			noisy spectra	128	5	opaque
	JS-NGO-01s	NGO-HM1	63-125	5166	Enstatite	0.0822	good_hit	101	154	orthopyroxene
	JS-NGO-01s	NGO-HM1	63-125	5167	Augite	0.0741	good_hit	101	23	clinopyroxene
	JS-NGO-01s	NGO-HM1	63-125	5168	Fluorapatite	0.0438	good_hit	90	114	apatite
	JS-NGO-01s	NGO-HM1	63-125	5169	Edenite	0.0669	good_hit	89	13	amphibole
	JS-NGO-01s	NGO-HM1	63-125	5170	Enstatite	0.05	good_hit	93	38	orthopyroxene
	JS-NGO-01s	NGO-HM1	63-125	5171	Pyrope	0.0358	good_hit	105	111	garnet
	JS-NGO-01s	NGO-HM1	63-125	5172	Amphibole	0.2955	medium_hit	88	8	amphibole
	JS-NGO-01s	NGO-HM1	63-125	5173	Tausonite	0.3509	ungrouped	216	6	opaque
	JS-NGO-01s	NGO-HM1	63-125	5174	Amphibole	0.1565	medium_hit	88	18	amphibole
	JS-NGO-01s	NGO-HM1	63-125	5175	Edenite	0.0686	good_hit	89	14	amphibole
	JS-NGO-01s	NGO-HM1	63-125	5176	Ferrosilite	0.0262	good_hit	107	55	orthopyroxene
	JS-NGO-01s	NGO-HM1	63-125	5177	Diopside	0.0625	good_hit	102	120	clinopyroxene
	JS-NGO-01s	NGO-HM1	63-125	5178	Diopside	0.0485	good_hit	101	43	clinopyroxene
	JS-NGO-01s	NGO-HM1	63-125	5179	Augite	0.1376	good_hit	100	113	clinopyroxene
	JS-NGO-01s	NGO-HM1	63-125	5180	Edenite	0.0628	good_hit	94	37	amphibole
	JS-NGO-01s	NGO-HM1	63-125	5181	Amphibole	0.0865	good_hit	98	7	amphibole
	JS-NGO-01s	NGO-HM1	63-125	5182	Enstatite	0.0443	good_hit	104	112	orthopyroxene
	JS-NGO-01s	NGO-HM1	63-125	5183	Ferrosilite	0.0477	good_hit	101	110	orthopyroxene
	JS-NGO-01s	NGO-HM1	63-125	5184	Enstatite	0.0529	good_hit	104	92	orthopyroxene
	JS-NGO-01s	NGO-HM1	63-125	5185	Pyrope	0.0425	good_hit	113	106	garnet
	JS-NGO-01s	NGO-HM1	63-125	5186	Amphibole	0.1245	good_hit	82	26	amphibole
	JS-NGO-01s	NGO-HM1	63-125	5187	Augite	0.0439	good_hit	109	14	clinopyroxene
	JS-NGO-01s	NGO-HM1	63-125	5188	Eglestonite	0.1644	ungrouped	91	7	phyllosilicate
	JS-NGO-01s	NGO-HM1	63-125	5189	Augite	0.076	good_hit	94	61	clinopyroxene
	JS-NGO-01s	NGO-HM1	63-125	5190	Enstatite	0.2018	medium_hit	99	40	orthopyroxene
	JS-NGO-01s	NGO-HM1	63-125	5191	Augite	0.0404	good_hit	98	73	clinopyroxene
	JS-NGO-01s	NGO-HM1	63-125	5192	Diopside	0.0848	good_hit	94	13	clinopyroxene
	JS-NGO-01s	NGO-HM1	63-125	5193	Amphibole	0.1292	good_hit	94	10	amphibole
	JS-NGO-01s	NGO-HM1	63-125	5194	Diopside	0.0709	good_hit	97	12	clinopyroxene
	JS-NGO-01s	NGO-HM1	63-125	5195	Ferrosilite	0.0291	good_hit	106	186	orthopyroxene
	JS-NGO-01s	NGO-HM1	63-125	5196	Enstatite	0.0672	good_hit	99	97	orthopyroxene
	JS-NGO-01s	NGO-HM1	63-125	5197	Pyrope	0.044	good_hit	112	126	garnet
	JS-NGO-01s	NGO-HM1	63-125	5198	Pyrope	0.0397	good_hit	100	99	garnet
	JS-NGO-01s	NGO-HM1	63-125	5199	Amphibole	0.1803	medium_hit	95	15	amphibole
	JS-NGO-01s	NGO-HM1	63-125	5200	Ferrosilite	0.1486	good_hit	111	74	orthopyroxene
	JS-NGO-01s	NGO-HM1	63-125	5201	Edenite	0.1417	good_hit	93	56	amphibole
	JS-NGO-01s	NGO-HM1	63-125	5202	Annite	0.345	no_hit	97	12	amphibole
	JS-NGO-01s	NGO-HM1	63-125	5203	Amphibole	0.2514	medium_hit	89	9	amphibole
	JS-NGO-01s	NGO-HM1	63-125	5204	Amphibole	0.2405	medium_hit	89	17	amphibole
	JS-NGO-01s	NGO-HM1	63-125	5205	Warwickite	0.3323	ungrouped	90	7	amphibole
	JS-NGO-01s	NGO-HM1	63-125	5206	Diopside	0.0636	good_hit	85	27	clinopyroxene
	JS-NGO-01s	NGO-HM1	63-125	5207	Amphibole	0.1012	good_hit	99	37	amphibole
	JS-NGO-01s	NGO-HM1	63-125	5208	Augite	0.0602	good_hit	99	16	clinopyroxene
	JS-NGO-01s	NGO-HM1	63-125	5209	Augite	0.0666	good_hit	102	40	clinopyroxene
	JS-NGO-01s	NGO-HM1	63-125	5210	Amphibole	0.1788	medium_hit	84	29	amphibole
	JS-NGO-01s	NGO-HM1	63-125	5211	Anatase-Brookite-Intergrowth	0.062	good_hit	85	6	TiO2(other)
	JS-NGO-01s	NGO-HM1	63-125	5212	Enstatite	0.0586	good_hit	98	14	orthopyroxene
	JS-NGO-01s	NGO-HM1	63-125	5213	Augite	0.0637	good_hit	96	12	clinopyroxene
	JS-NGO-01s	NGO-HM1	63-125	5214	Ferrosilite	0.0834	good_hit	108	68	orthopyroxene
	JS-NGO-01s	NGO-HM1	63-125	5215	Amphibole	0.1585	medium_hit	98	5	amphibole
	JS-NGO-01s	NGO-HM1	63-125	5216	Semseyite	0.2395	ungrouped	251	5	opaque
	JS-NGO-01s	NGO-HM1	63-125	5217	Annite	0.2974	medium_hit	91	6	amphibole
	JS-NGO-01s	NGO-HM1	63-125	5218	Pyrope	0.0362	good_hit	122	123	garnet
	JS-NGO-01s	NGO-HM1	63-125	5219			noisy spectra	145	7	opaque
	JS-NGO-01s	NGO-HM1	63-125	5220	Almandine	0.0488	good_hit	112	122	garnet
	JS-NGO-01s	NGO-HM1	63-125	5221	Ferrosilite	0.0342	good_hit	103	104	orthopyroxene
	JS-NGO-01s	NGO-HM1	63-125	5222	Pyrope	0.0357	good_hit	117	143	garnet
	JS-NGO-01s	NGO-HM1	63-125	5223	Pyrope	0.0207	good_hit	124	91	garnet
	JS-NGO-01s	NGO-HM1	63-125	5224	Enstatite	0.0452	good_hit	96	14	orthopyroxene
	JS-NGO-01s	NGO-HM1	63-125	5225	Enstatite	0.0511	good_hit	104	102	orthopyroxene
	JS-NGO-01s	NGO-HM1	63-125	5226	Pyrope	0.0408	good_hit	105	148	garnet
	JS-NGO-01s	NGO-HM1	63-125	5227	Amphibole	0.3508	no_hit	99	12	amphibole
	JS-NGO-01s	NGO-HM1	63-125	5228	Ferrosilite	0.0417	good_hit	97	13	orthopyroxene
	JS-NGO-01s	NGO-HM1	63-125	5229	Amphibole	0.1116	good_hit	95	6	amphibole
	JS-NGO-01s	NGO-HM1	63-125	5230	Magnetite	0.06	good_hit	255	5	opaque
	JS-NGO-01s	NGO-HM1	63-125	5231			noisy spectra	88	92	clinopyroxene
	JS-NGO-01s	NGO-HM1	63-125	5232	Almandine	0.0449	good_hit	108	19	garnet
	JS-NGO-01s	NGO-HM1	63-125	5233	Anatase	0.0704	good_hit	193	5	TiO2(other)
	JS-NGO-01s	NGO-HM1	63-125	5234	Amphibole	0.1158	good_hit	92	24	amphibole
	JS-NGO-01s	NGO-HM1	63-125	5235	Amphibole	0.1552	medium_hit	89	47	amphibole
	JS-NGO-01s	NGO-HM1	63-125	5236	Ferrosilite	0.038	good_hit	99	61	orthopyroxene
	JS-NGO-01s	NGO-HM1	63-125	5237	Edenite	0.0859	good_hit	93	5	amphibole
	JS-NGO-01s	NGO-HM1	63-125	5238	Pyrope	0.0462	good_hit	119	162	garnet
	JS-NGO-01s	NGO-HM1	63-125	5239	Pyrope	0.0489	good_hit	124	140	garnet
	JS-NGO-01s	NGO-HM1	63-125	5240	Diopside	0.0572	good_hit	103	83	clinopyroxene
	JS-NGO-01s	NGO-HM1	63-125	5241	Orthoclase	0.1113	good_hit	71	105	feldspar
	JS-NGO-01s	NGO-HM1	63-125	5242	Amphibole	0.0852	good_hit	91	29	amphibole
	JS-NGO-01s	NGO-HM1	63-125	5243	Spessartine	0.0541	good_hit	109	73	garnet
	JS-NGO-01s	NGO-HM1	63-125	5244	Edenite	0.0972	good_hit	85	41	amphibole
	JS-NGO-01s	NGO-HM1	63-125	5245	Ferrosilite	0.0571	good_hit	109	122	orthopyroxene
	JS-NGO-01s	NGO-HM1	63-125	5246	Pyrope	0.0274	good_hit	122	103	garnet
	JS-NGO-01s	NGO-HM1	63-125	5247	Pyrope	0.0296	good_hit	117	90	garnet
	JS-NGO-01s	NGO-HM1	63-125	5248	Amphibole	0.112	good_hit	96	18	amphibole
	JS-NGO-01s	NGO-HM1	63-125	5249	Amphibole	0.1087	good_hit	96	36	amphibole
	JS-NGO-01s	NGO-HM1	63-125	5250	Pyrope	0.0522	good_hit	114	91	garnet
	JS-NGO-01s	NGO-HM1	63-125	5251	Augite	0.0309	good_hit	97	30	orthopyroxene
	JS-NGO-01s	NGO-HM1	63-125	5252	Almandine	0.0491	good_hit	118	133	garnet
	JS-NGO-01s	NGO-HM1	63-125	5253	Augite	0.0403	good_hit	99	66	clinopyroxene
	JS-NGO-01s	NGO-HM1	63-125	5254	Amphibole	0.0501	good_hit	95	21	amphibole
	JS-NGO-01s	NGO-HM1	63-125	5255	Enstatite	0.0729	good_hit	105	101	orthopyroxene
	JS-NGO-01s	NGO-HM1	63-125	5256	Magnetite	0.0121	good_hit	255	5	opaque
	JS-NGO-01s	NGO-HM1	63-125	5257	Pyrope	0.2331	medium_hit	116	8	garnet
	JS-NGO-01s	NGO-HM1	63-125	5258	Enstatite	0.0873	good_hit	90	66	orthopyroxene
	JS-NGO-01s	NGO-HM1	63-125	5259	Edenite	0.1199	good_hit	85	8	amphibole
	JS-NGO-01s	NGO-HM1	63-125	5260	Amphibole	0.0506	good_hit	83	43	amphibole
	JS-NGO-01s	NGO-HM1	63-125	5261	Sillimanite	0.0208	good_hit	85	99	sillimanite
	JS-NGO-01s	NGO-HM1	63-125	5262	Amphibole	0.0697	good_hit	87	8	amphibole
	JS-NGO-01s	NGO-HM1	63-125	5263	Ilmenite	0.2384	medium_hit	240	5	opaque
	JS-NGO-01s	NGO-HM1	63-125	5264	Ilmenite	0.1673	medium_hit	255	5	opaque
	JS-NGO-01s	NGO-HM1	63-125	5265	Edenite	0.0777	good_hit	93	13	amphibole
	JS-NGO-01s	NGO-HM1	63-125	5266	Pyrope	0.0191	good_hit	116	119	garnet
	JS-NGO-01s	NGO-HM1	63-125	5267	Pyrope	0.0217	good_hit	115	159	garnet
	JS-NGO-01s	NGO-HM1	63-125	5268	Annite	0.3382	no_hit	93	8	amphibole
	JS-NGO-01s	NGO-HM1	63-125	5269	Pyrope	0.0348	good_hit	117	156	garnet
	JS-NGO-01s	NGO-HM1	63-125	5270	Enstatite	0.0722	good_hit	104	14	orthopyroxene
	JS-NGO-01s	NGO-HM1	63-125	5271	Actinolite	0.0652	good_hit	91	30	amphibole
	JS-NGO-01s	NGO-HM1	63-125	5272	Chalcomenite	0.4144	ungrouped	85	7	not_identified
	JS-NGO-01s	NGO-HM1	63-125	5273	Ferrosilite	0.0532	good_hit	108	87	orthopyroxene
	JS-NGO-01s	NGO-HM1	63-125	5274	Edenite	0.0763	good_hit	98	29	amphibole
	JS-NGO-01s	NGO-HM1	63-125	5275			noisy spectra	64	8	phyllosilicate
	JS-NGO-01s	NGO-HM1	63-125	5276	Amphibole	0.0337	good_hit	96	39	amphibole
	JS-NGO-01s	NGO-HM1	63-125	5277	Diopside	0.0863	good_hit	88	69	orthopyroxene
	JS-NGO-01s	NGO-HM1	63-125	5278	Fluorapatite	0.2202	medium_hit	93	99	apatite
	JS-NGO-01s	NGO-HM1	63-125	5279	Diopside	0.058	good_hit	96	74	clinopyroxene
	JS-NGO-01s	NGO-HM1	63-125	5280	Augite	0.0722	good_hit	106	43	clinopyroxene
	JS-NGO-01s	NGO-HM1	63-125	5281	Amphibole	0.1129	good_hit	86	10	amphibole
	JS-NGO-01s	NGO-HM1	63-125	5282	Epidote	0.1123	good_hit	105	92	epidote
	JS-NGO-01s	NGO-HM1	63-125	5283	Ilmenite	0.1614	medium_hit	235	5	opaque
	JS-NGO-01s	NGO-HM1	63-125	5284	Fluorapatite	0.0968	good_hit	93	144	apatite
	JS-NGO-01s	NGO-HM1	63-125	5285	Augite	0.0761	good_hit	98	72	clinopyroxene
	JS-NGO-01s	NGO-HM1	63-125	5286	Pyrope	0.028	good_hit	119	62	garnet
	JS-NGO-01s	NGO-HM1	63-125	5287	Amphibole	0.037	good_hit	92	14	amphibole
	JS-NGO-01s	NGO-HM1	63-125	5288	Blixite	0.0996	ungrouped	255	7	not_identified
	JS-NGO-01s	NGO-HM1	63-125	5289	Pyrope	0.1868	medium_hit	119	104	garnet
	JS-NGO-01s	NGO-HM1	63-125	5290			noisy spectra	247	8	opaque
	JS-NGO-01s	NGO-HM1	63-125	5291	Enstatite	0.063	good_hit	108	61	orthopyroxene
	JS-NGO-01s	NGO-HM1	63-125	5292	Amphibole	0.0818	good_hit	96	38	amphibole
	JS-NGO-01s	NGO-HM1	63-125	5293			noisy spectra	96	113	not_identified
	JS-NGO-01s	NGO-HM1	63-125	5294			noisy spectra	103	130	not_identified
	JS-NGO-01s	NGO-HM1	63-125	5295	Pyrope	0.0389	good_hit	124	165	garnet
	JS-NGO-01s	NGO-HM1	63-125	5296	Ferrosilite	0.0588	good_hit	105	41	orthopyroxene
	JS-NGO-01s	NGO-HM1	63-125	5297			noisy spectra	92	97	not_identified
	JS-NGO-01s	NGO-HM1	63-125	5298	Albite	0.1347	good_hit	70	94	feldspar
	JS-NGO-01s	NGO-HM1	63-125	5299	Edenite	0.0764	good_hit	92	9	amphibole
	JS-NGO-01s	NGO-HM1	63-125	5300	Epidote	0.1369	good_hit	104	86	epidote
	JS-NGO-01s	NGO-HM1	63-125	5301	Pyrope	0.0397	good_hit	116	116	garnet
	JS-NGO-01s	NGO-HM1	63-125	5302	Almandine	0.0444	good_hit	115	89	garnet
	JS-NGO-01s	NGO-HM1	63-125	5303	Amphibole	0.1003	good_hit	99	34	amphibole
	JS-NGO-01s	NGO-HM1	63-125	5304	Annite	0.3514	no_hit	100	8	amphibole
	JS-NGO-01s	NGO-HM1	63-125	5305	Pyrope	0.035	good_hit	117	23	garnet
	JS-NGO-01s	NGO-HM1	63-125	5306	Pyrope	0.0392	good_hit	125	101	garnet
	JS-NGO-01s	NGO-HM1	63-125	5307	Enstatite	0.0488	good_hit	107	175	orthopyroxene
	JS-NGO-01s	NGO-HM1	63-125	5308	Diopside	0.1005	good_hit	100	43	clinopyroxene
	JS-NGO-01s	NGO-HM1	63-125	5309	Diopside	0.0436	good_hit	102	72	orthopyroxene
	JS-NGO-01s	NGO-HM1	63-125	5310	Fluorapatite	0.0568	good_hit	87	150	apatite
	JS-NGO-01s	NGO-HM1	63-125	5311	Ilmenite	0.1702	medium_hit	238	5	opaque
	JS-NGO-01s	NGO-HM1	63-125	5312	Fluorapatite	0.1697	medium_hit	89	121	apatite
	JS-NGO-01s	NGO-HM1	63-125	5313	Amphibole	0.2959	medium_hit	91	14	amphibole
	JS-NGO-01s	NGO-HM1	63-125	5314	Amphibole	0.3012	no_hit	99	10	amphibole
	JS-NGO-01s	NGO-HM1	63-125	5315	Diopside	0.0597	good_hit	91	70	orthopyroxene
	JS-NGO-01s	NGO-HM1	63-125	5316	Magnetite	0.027	good_hit	252	5	opaque
	JS-NGO-01s	NGO-HM1	63-125	5317	Diopside	0.068	good_hit	98	20	clinopyroxene
	JS-NGO-01s	NGO-HM1	63-125	5318	Amphibole	0.1409	good_hit	93	9	amphibole
	JS-NGO-01s	NGO-HM1	63-125	5319	Diopside	0.0476	good_hit	97	94	clinopyroxene
	JS-NGO-01s	NGO-HM1	63-125	5320	Amphibole	0.1837	medium_hit	89	5	amphibole
	JS-NGO-01s	NGO-HM1	63-125	5321	Annite	0.3276	no_hit	97	5	amphibole
	JS-NGO-01s	NGO-HM1	63-125	5322	Augite	0.0489	good_hit	90	37	clinopyroxene
	JS-NGO-01s	NGO-HM1	63-125	5323	Hematite	0.3167	no_hit	255	5	opaque
	JS-NGO-01s	NGO-HM1	63-125	5324	Diopside	0.0391	good_hit	101	73	orthopyroxene
	JS-NGO-01s	NGO-HM1	63-125	5325	Amphibole	0.0743	good_hit	98	47	amphibole
	JS-NGO-01s	NGO-HM1	63-125	5326	Diopside	0.0374	good_hit	101	34	orthopyroxene
	JS-NGO-01s	NGO-HM1	63-125	5327	GersdorffiteP213	0.2912	ungrouped	235	6	opaque
	JS-NGO-01s	NGO-HM1	63-125	5328	Amphibole	0.2823	medium_hit	103	7	amphibole
	JS-NGO-01s	NGO-HM1	63-125	5329	Triplite	0.1879	ungrouped	92	15	not_identified
	JS-NGO-01s	NGO-HM1	63-125	5330	Amphibole	0.27	medium_hit	101	6	amphibole
	JS-NGO-01s	NGO-HM1	63-125	5331	Amphibole	0.1729	medium_hit	86	37	amphibole
	JS-NGO-01s	NGO-HM1	63-125	5332	Amphibole	0.0913	good_hit	92	72	amphibole
	JS-NGO-01s	NGO-HM1	63-125	5333	Amphibole	0.1855	medium_hit	97	25	amphibole
	JS-NGO-01s	NGO-HM1	63-125	5334	Amphibole	0.1099	good_hit	98	7	amphibole
	JS-NGO-01s	NGO-HM1	63-125	5335	Pyrope	0.0352	good_hit	122	88	garnet
	JS-NGO-01s	NGO-HM1	63-125	5336	Enstatite	0.0839	good_hit	100	59	orthopyroxene
	JS-NGO-01s	NGO-HM1	63-125	5337	Enstatite	0.2983	medium_hit	105	36	orthopyroxene
	JS-NGO-01s	NGO-HM1	63-125	5338			noisy spectra	63	45	not_identified
	JS-NGO-01s	NGO-HM1	63-125	5339	Annite	0.2986	medium_hit	94	12	amphibole
	JS-NGO-01s	NGO-HM1	63-125	5340			noisy spectra	52	8	opaque
	JS-NGO-01s	NGO-HM1	63-125	5341			noisy spectra	90	5	amphibole
	JS-NGO-01s	NGO-HM1	63-125	5342	Amphibole	0.2868	medium_hit	96	10	amphibole
	JS-NGO-01s	NGO-HM1	63-125	5343	Ferrosilite	0.0444	good_hit	95	61	orthopyroxene
	JS-NGO-01s	NGO-HM1	63-125	5344	Warwickite	0.3198	ungrouped	82	7	amphibole
	JS-NGO-01s	NGO-HM1	63-125	5345	Augite	0.0497	good_hit	93	6	clinopyroxene
	JS-NGO-01s	NGO-HM1	63-125	5346	Amphibole	0.2811	medium_hit	96	7	amphibole
	JS-NGO-01s	NGO-HM1	63-125	5347	Edenite	0.1882	medium_hit	95	15	amphibole
	JS-NGO-01s	NGO-HM1	63-125	5348	Amphibole	0.1265	good_hit	92	16	amphibole
	JS-NGO-01s	NGO-HM1	63-125	5349	Almandine	0.0459	good_hit	121	237	garnet
	JS-NGO-01s	NGO-HM1	63-125	5350	Diopside	0.077	good_hit	103	83	clinopyroxene
	JS-NGO-01s	NGO-HM1	63-125	5351	Diopside	0.0492	good_hit	99	28	clinopyroxene
	JS-NGO-01s	NGO-HM1	63-125	5352	Diopside	0.0674	good_hit	95	17	clinopyroxene
	JS-NGO-01s	NGO-HM1	63-125	5353	Almandine	0.0332	good_hit	125	100	garnet
	JS-NGO-01s	NGO-HM1	63-125	5354			noisy spectra	92	17	clinopyroxene
	JS-NGO-01s	NGO-HM1	63-125	5355	Rutile	0.0323	good_hit	250	5	rutile
	JS-NGO-01s	NGO-HM1	63-125	5356	Ilmenite	0.169	medium_hit	255	5	opaque
	JS-NGO-01s	NGO-HM1	63-125	5357	Edenite	0.0999	good_hit	92	64	amphibole
	JS-NGO-01s	NGO-HM1	63-125	5358	Annite	0.3003	no_hit	96	15	amphibole
	JS-NGO-01s	NGO-HM1	63-125	5359	Diopside	0.0723	good_hit	100	126	orthopyroxene
	JS-NGO-01s	NGO-HM1	63-125	5360	Pyrope	0.0214	good_hit	102	34	garnet
	JS-NGO-01s	NGO-HM1	63-125	5361	Fluorapatite	0.0623	good_hit	89	113	apatite
	JS-NGO-01s	NGO-HM1	63-125	5362	Epidote	0.0932	good_hit	115	65	epidote
	JS-NGO-01s	NGO-HM1	63-125	5363	Amphibole	0.2131	medium_hit	93	51	amphibole
	JS-NGO-01s	NGO-HM1	63-125	5364	Amphibole	0.2765	medium_hit	93	11	amphibole
	JS-NGO-01s	NGO-HM1	63-125	5365	Pyrope	0.0371	good_hit	113	7	garnet
	JS-NGO-01s	NGO-HM1	63-125	5366	Edenite	0.1104	good_hit	98	7	amphibole
	JS-NGO-01s	NGO-HM1	63-125	5367	Edenite	0.0755	good_hit	95	18	amphibole
	JS-NGO-01s	NGO-HM1	63-125	5368	Ferrosilite	0.0467	good_hit	95	26	orthopyroxene
	JS-NGO-01s	NGO-HM1	63-125	5369	Diopside	0.0417	good_hit	100	27	clinopyroxene
	JS-NGO-01s	NGO-HM1	63-125	5370	Enstatite	0.0582	good_hit	105	57	orthopyroxene
	JS-NGO-01s	NGO-HM1	63-125	5371	Pyrope	0.0537	good_hit	120	67	garnet
	JS-NGO-01s	NGO-HM1	63-125	5372	Augite	0.0946	good_hit	102	22	clinopyroxene
	JS-NGO-01s	NGO-HM1	63-125	5373	Pyrope	0.0266	good_hit	120	131	garnet
	JS-NGO-01s	NGO-HM1	63-125	5374	Diopside	0.0321	good_hit	96	34	clinopyroxene
	JS-NGO-01s	NGO-HM1	63-125	5375	Annite	0.3677	no_hit	102	5	amphibole
	JS-NGO-01s	NGO-HM1	63-125	5376	FaujasiteMg	0.1886	ungrouped	78	109	not_identified
	JS-NGO-01s	NGO-HM1	63-125	5377	Sillimanite	0.0586	good_hit	95	165	sillimanite
	JS-NGO-01s	NGO-HM1	63-125	5378	Amphibole	0.1452	good_hit	100	4	amphibole
	JS-NGO-01s	NGO-HM1	63-125	5379			noisy spectra	88	16	not_identified
	JS-NGO-01s	NGO-HM1	63-125	5380	Edenite	0.1623	medium_hit	94	6	amphibole
	JS-NGO-01s	NGO-HM1	63-125	5381	Edenite	0.1781	medium_hit	87	9	amphibole
	JS-NGO-01s	NGO-HM1	63-125	5382	Pyrope	0.0555	good_hit	118	52	garnet
	JS-NGO-01s	NGO-HM1	63-125	5383	Edenite	0.0936	good_hit	95	56	amphibole
	JS-NGO-01s	NGO-HM1	63-125	5384	Quartz	0.0214	good_hit	74	18	quartz
	JS-NGO-01s	NGO-HM1	63-125	5385	Enstatite	0.072	good_hit	92	12	orthopyroxene
	JS-NGO-01s	NGO-HM1	63-125	5386	Augite	0.0494	good_hit	98	74	clinopyroxene
	JS-NGO-01s	NGO-HM1	63-125	5387	Amphibole	0.093	good_hit	94	29	amphibole
	JS-NGO-01s	NGO-HM1	63-125	5388	Edenite	0.098	good_hit	99	5	amphibole
	JS-NGO-01s	NGO-HM1	63-125	5389	Epidote	0.0751	good_hit	112	12	epidote
	JS-NGO-01s	NGO-HM1	63-125	5390	Albite	0.1331	good_hit	73	22	feldspar
	JS-NGO-01s	NGO-HM1	63-125	5391	Eglestonite	0.1993	ungrouped	84	44	phyllosilicate
	JS-NGO-01s	NGO-HM1	63-125	5392	Diopside	0.0302	good_hit	93	32	clinopyroxene
	JS-NGO-01s	NGO-HM1	63-125	5393	Pyrope	0.0265	good_hit	109	62	garnet
	JS-NGO-01s	NGO-HM1	63-125	5394	Amphibole	0.134	good_hit	87	31	amphibole
	JS-NGO-01s	NGO-HM1	63-125	5395	Amphibole	0.2632	medium_hit	100	22	amphibole
	JS-NGO-01s	NGO-HM1	63-125	5396	Almandine	0.045	good_hit	116	44	garnet
	JS-NGO-01s	NGO-HM1	63-125	5397	Annite	0.3324	no_hit	99	13	amphibole
	JS-NGO-01s	NGO-HM1	63-125	5398	Augite	0.0936	good_hit	88	70	clinopyroxene
	JS-NGO-01s	NGO-HM1	63-125	5399	Amphibole	0.0747	good_hit	93	65	amphibole
	JS-NGO-01s	NGO-HM1	63-125	5400	Enstatite	0.052	good_hit	108	24	orthopyroxene
	JS-NGO-01s	NGO-HM1	63-125	5401	Diopside	0.0231	good_hit	104	110	clinopyroxene
	JS-NGO-01s	NGO-HM1	63-125	5402	Edenite	0.4413	no_hit	92	10	amphibole
	JS-NGO-01s	NGO-HM1	63-125	5403	Amphibole	0.0495	good_hit	90	36	amphibole
	JS-NGO-01s	NGO-HM1	63-125	5404	Annite	0.2629	medium_hit	97	15	amphibole
	JS-NGO-01s	NGO-HM1	63-125	5405	Diopside	0.2019	medium_hit	101	138	clinopyroxene
	JS-NGO-01s	NGO-HM1	63-125	5406	Pyrope	0.0442	good_hit	122	164	garnet
	JS-NGO-01s	NGO-HM1	63-125	5407	Pyrope	0.032	good_hit	115	49	garnet
	JS-NGO-01s	NGO-HM1	63-125	5408	Pyrope	0.0279	good_hit	121	117	garnet
	JS-NGO-01s	NGO-HM1	63-125	5409	Quartz	0.0299	good_hit	75	72	quartz
	JS-NGO-01s	NGO-HM1	63-125	5410	Amphibole	0.1307	good_hit	95	19	amphibole
	JS-NGO-01s	NGO-HM1	63-125	5411	Amphibole	0.1404	good_hit	99	15	amphibole
	JS-NGO-01s	NGO-HM1	63-125	5412	Enstatite	0.0469	good_hit	103	50	orthopyroxene
	JS-NGO-01s	NGO-HM1	63-125	5413	Amphibole	0.1796	medium_hit	97	22	amphibole
	JS-NGO-01s	NGO-HM1	63-125	5414	Augite	0.0314	good_hit	100	18	clinopyroxene
	JS-NGO-01s	NGO-HM1	63-125	5415	Diopside	0.0593	good_hit	106	12	clinopyroxene
	JS-NGO-01s	NGO-HM1	63-125	5416	Amphibole	0.2513	medium_hit	90	16	amphibole
	JS-NGO-01s	NGO-HM1	63-125	5417	Amphibole	0.194	medium_hit	99	13	amphibole
	JS-NGO-01s	NGO-HM1	63-125	5418	Fluorapatite	0.0651	good_hit	81	107	apatite
	JS-NGO-01s	NGO-HM1	63-125	5419	Augite	0.0602	good_hit	85	85	clinopyroxene
	JS-NGO-01s	NGO-HM1	63-125	5420	Amphibole	0.3123	no_hit	77	25	amphibole
	JS-NGO-01s	NGO-HM1	63-125	5421	Amphibole	0.1319	good_hit	82	19	amphibole
	JS-NGO-01s	NGO-HM1	63-125	5422	Pyrope	0.0371	good_hit	115	167	garnet
	JS-NGO-01s	NGO-HM1	63-125	5423	Fluorapatite	0.0608	good_hit	81	101	apatite
	JS-NGO-01s	NGO-HM1	63-125	5424	Ilmenite	0.2619	medium_hit	248	4	opaque
	JS-NGO-01s	NGO-HM1	63-125	5425	Annite	0.2859	medium_hit	94	9	amphibole
	JS-NGO-01s	NGO-HM1	63-125	5426	Edenite	0.1342	good_hit	95	13	amphibole
	JS-NGO-01s	NGO-HM1	63-125	5427	Amphibole	0.2473	medium_hit	95	18	amphibole
	JS-NGO-01s	NGO-HM1	63-125	5428	Fluorapatite	0.0765	good_hit	82	65	apatite
	JS-NGO-01s	NGO-HM1	63-125	5429	Augite	0.0556	good_hit	104	49	clinopyroxene
	JS-NGO-01s	NGO-HM1	63-125	5430	Zircon	0.1458	good_hit	148	22	zircon
	JS-NGO-01s	NGO-HM1	63-125	5431	Diopside	0.0585	good_hit	99	125	clinopyroxene
	JS-NGO-01s	NGO-HM1	63-125	5432	Fluorapatite	0.1706	medium_hit	88	117	apatite
	JS-NGO-01s	NGO-HM1	63-125	5433	Amphibole	0.2338	medium_hit	99	19	amphibole
	JS-NGO-01s	NGO-HM1	63-125	5434	Pyrope	0.036	good_hit	125	239	garnet
	JS-NGO-01s	NGO-HM1	63-125	5435	Ilmenite	0.2996	medium_hit	255	4	opaque
	JS-NGO-01s	NGO-HM1	63-125	5436	Amphibole	0.2791	medium_hit	100	23	amphibole
	JS-NGO-01s	NGO-HM1	63-125	5437	Diopside	0.1123	good_hit	95	214	clinopyroxene
	JS-NGO-01s	NGO-HM1	63-125	5438	Diopside	0.0397	good_hit	97	50	clinopyroxene
	JS-NGO-01s	NGO-HM1	63-125	5439	Diopside	0.0443	good_hit	109	94	orthopyroxene
	JS-NGO-01s	NGO-HM1	63-125	5440	Enstatite	0.0496	good_hit	99	72	orthopyroxene
	JS-NGO-01s	NGO-HM1	63-125	5441	Amphibole	0.1674	medium_hit	92	65	amphibole
	JS-NGO-01s	NGO-HM1	63-125	5442	Siegenite	0.3035	ungrouped	80	41	not_identified
	JS-NGO-01s	NGO-HM1	63-125	5443	Augite	0.0976	good_hit	96	92	clinopyroxene
	JS-NGO-01s	NGO-HM1	63-125	5444			noisy spectra	97	70	not_identified
	JS-NGO-01s	NGO-HM1	63-125	5445	Quartz	0.0365	good_hit	73	118	quartz
	JS-NGO-01s	NGO-HM1	63-125	5446	Tremolite	0.1062	good_hit	94	4	amphibole
	JS-NGO-01s	NGO-HM1	63-125	5447	Amphibole	0.2037	medium_hit	98	14	amphibole
	JS-NGO-01s	NGO-HM1	63-125	5448	Pyrope	0.0316	good_hit	118	131	garnet
	JS-NGO-01s	NGO-HM1	63-125	5449	Galeite	0.277	ungrouped	105	122	not_identified
	JS-NGO-01s	NGO-HM1	63-125	5450	Diopside	0.0381	good_hit	101	47	clinopyroxene
	JS-NGO-01s	NGO-HM1	63-125	5451	Actinolite	0.0355	good_hit	91	75	amphibole
	JS-NGO-01s	NGO-HM1	63-125	5452	Actinolite	0.0868	good_hit	89	79	amphibole
	JS-NGO-01s	NGO-HM1	63-125	5453	Enstatite	0.0417	good_hit	98	81	orthopyroxene
	JS-NGO-01s	NGO-HM1	63-125	5454	Amphibole	0.1054	good_hit	94	26	amphibole
	JS-NGO-01s	NGO-HM1	63-125	5455	Ilmenite	0.1584	medium_hit	255	4	opaque
	JS-NGO-01s	NGO-HM1	63-125	5456	Ferrosilite	0.0639	good_hit	102	112	orthopyroxene
	JS-NGO-01s	NGO-HM1	63-125	5457	Diopside	0.0473	good_hit	93	31	orthopyroxene
	JS-NGO-01s	NGO-HM1	63-125	5458	Warwickite	0.3053	ungrouped	82	28	amphibole
	JS-NGO-01s	NGO-HM1	63-125	5459	Annite	0.2844	medium_hit	99	15	amphibole
	JS-NGO-01s	NGO-HM1	63-125	5460	Amphibole	0.1718	medium_hit	95	10	amphibole
	JS-NGO-01s	NGO-HM1	63-125	5461	Amphibole	0.0922	good_hit	94	19	amphibole
	JS-NGO-01s	NGO-HM1	63-125	5462			noisy spectra	93	15	amphibole
	JS-NGO-01s	NGO-HM1	63-125	5463	Diopside	0.0727	good_hit	104	48	clinopyroxene
	JS-NGO-01s	NGO-HM1	63-125	5464	Amphibole	0.1411	good_hit	98	18	amphibole
	JS-NGO-01s	NGO-HM1	63-125	5465	Magnetite	0.2073	medium_hit	255	5	opaque
	JS-NGO-01s	NGO-HM1	63-125	5466	Amphibole	0.1936	medium_hit	95	7	amphibole
	JS-NGO-01s	NGO-HM1	63-125	5467	Diopside	0.0606	good_hit	100	20	orthopyroxene
	JS-NGO-01s	NGO-HM1	63-125	5468	Edenite	0.1264	good_hit	98	32	amphibole
	JS-NGO-01s	NGO-HM1	63-125	5469	Annite	0.33	no_hit	101	19	amphibole
	JS-NGO-01s	NGO-HM1	63-125	5470	Amphibole	0.0748	good_hit	89	14	amphibole
	JS-NGO-01s	NGO-HM1	63-125	5471	Amphibole	0.0468	good_hit	97	64	amphibole
	JS-NGO-01s	NGO-HM1	63-125	5472	Almandine	0.0246	good_hit	127	96	garnet
	JS-NGO-01s	NGO-HM1	63-125	5473	Augite	0.0462	good_hit	104	57	clinopyroxene
	JS-NGO-01s	NGO-HM1	63-125	5474	Pyrope	0.0467	good_hit	120	49	garnet
	JS-NGO-01s	NGO-HM1	63-125	5475	Pyrope	0.0422	good_hit	111	109	garnet
	JS-NGO-01s	NGO-HM1	63-125	5476	Pyrope	0.0396	good_hit	120	125	garnet
	JS-NGO-01s	NGO-HM1	63-125	5477	Enstatite	0.0541	good_hit	97	215	orthopyroxene
	JS-NGO-01s	NGO-HM1	63-125	5478	Enstatite	0.0443	good_hit	106	23	orthopyroxene
	JS-NGO-01s	NGO-HM1	63-125	5479	Diopside	0.0749	good_hit	104	53	orthopyroxene
	JS-NGO-01s	NGO-HM1	63-125	5480	Ferrosilite	0.0224	good_hit	102	82	orthopyroxene
	JS-NGO-01s	NGO-HM1	63-125	5481	Amphibole	0.2387	medium_hit	77	11	amphibole
	JS-NGO-01s	NGO-HM1	63-125	5482	Edenite	0.0335	good_hit	76	14	amphibole
	JS-NGO-01s	NGO-HM1	63-125	5483	Diopside	0.0696	good_hit	95	94	orthopyroxene
	JS-NGO-01s	NGO-HM1	63-125	5484	Amphibole	0.2356	medium_hit	84	9	amphibole
	JS-NGO-01s	NGO-HM1	63-125	5485	Annite	0.364	no_hit	92	11	amphibole
	JS-NGO-01s	NGO-HM1	63-125	5486	Almandine	0.0352	good_hit	118	41	garnet
	JS-NGO-01s	NGO-HM1	63-125	5487	Enstatite	0.0879	good_hit	92	51	orthopyroxene
	JS-NGO-01s	NGO-HM1	63-125	5488	Pyrope	0.0411	good_hit	116	29	garnet
	JS-NGO-01s	NGO-HM1	63-125	5489	Edenite	0.0342	good_hit	94	20	amphibole
	JS-NGO-01s	NGO-HM1	63-125	5490	Ferrosilite	0.0474	good_hit	105	68	orthopyroxene
	JS-NGO-01s	NGO-HM1	63-125	5491	Pyrope	0.0469	good_hit	115	9	garnet
	JS-NGO-01s	NGO-HM1	63-125	5492	Fluorapatite	0.1549	medium_hit	88	108	apatite
	JS-NGO-01s	NGO-HM1	63-125	5493	Enstatite	0.0286	good_hit	108	210	orthopyroxene
	JS-NGO-01s	NGO-HM1	63-125	5494	Edenite	0.2135	medium_hit	104	4	amphibole
	JS-NGO-01s	NGO-HM1	63-125	5495	Fluorapatite	0.1513	medium_hit	91	116	apatite
	JS-NGO-01s	NGO-HM1	63-125	5496			noisy spectra	99	19	epidote
	JS-NGO-01s	NGO-HM1	63-125	5497	Amphibole	0.2531	medium_hit	98	21	amphibole
	JS-NGO-01s	NGO-HM1	63-125	5498	Edenite	0.1379	good_hit	92	15	amphibole
	JS-NGO-01s	NGO-HM1	63-125	5499	Augite	0.0622	good_hit	102	24	clinopyroxene
	JS-NGO-01s	NGO-HM1	63-125	5500	Amphibole	0.2868	medium_hit	99	18	amphibole
	JS-NGO-01s	NGO-HM1	63-125	5501	Spessartine	0.1684	medium_hit	123	17	garnet
	JS-NGO-01s	NGO-HM1	63-125	5502	Edenite	0.0708	good_hit	96	12	amphibole
	JS-NGO-01s	NGO-HM1	63-125	5503	Meieranite	0.4323	ungrouped	105	109	not_identified
	JS-NGO-01s	NGO-HM1	63-125	5504	Enstatite	0.062	good_hit	105	57	orthopyroxene
	JS-NGO-01s	NGO-HM1	63-125	5505	MonaziteCe	0.0632	good_hit	123	18	monazite
	JS-NGO-01s	NGO-HM1	63-125	5506	Pyrope	0.0392	good_hit	124	222	garnet
	JS-NGO-01s	NGO-HM1	63-125	5507	Pyrope	0.0419	good_hit	113	15	garnet
	JS-NGO-01s	NGO-HM1	63-125	5508			noisy spectra	87	43	phyllosilicate
	JS-NGO-01s	NGO-HM1	63-125	5509	Enstatite	0.0543	good_hit	107	61	orthopyroxene
	JS-NGO-01s	NGO-HM1	63-125	5510	Amphibole	0.1239	good_hit	94	7	amphibole
	JS-NGO-01s	NGO-HM1	63-125	5511	Amphibole	0.0867	good_hit	90	42	amphibole
	JS-NGO-01s	NGO-HM1	63-125	5512	Augite	0.0678	good_hit	104	51	clinopyroxene
	JS-NGO-01s	NGO-HM1	63-125	5513	Diopside	0.1632	medium_hit	101	74	clinopyroxene
	JS-NGO-01s	NGO-HM1	63-125	5514	Amphibole	0.1803	medium_hit	93	7	amphibole
	JS-NGO-01s	NGO-HM1	63-125	5515			noisy spectra	145	44	not_identified
	JS-NGO-01s	NGO-HM1	63-125	5516	Pyrope	0.0415	good_hit	121	107	garnet
	JS-NGO-01s	NGO-HM1	63-125	5517	Enstatite	0.0382	good_hit	95	76	orthopyroxene
	JS-NGO-01s	NGO-HM1	63-125	5518	Amphibole	0.1236	good_hit	81	44	amphibole
	JS-NGO-01s	NGO-HM1	63-125	5519	Edenite	0.044	good_hit	93	23	amphibole
	JS-NGO-01s	NGO-HM1	63-125	5520	Amphibole	0.2477	medium_hit	91	4	amphibole
	JS-NGO-01s	NGO-HM1	63-125	5521	Edenite	0.1064	good_hit	94	34	amphibole
	JS-NGO-01s	NGO-HM1	63-125	5522	Amphibole	0.1932	medium_hit	89	6	amphibole
	JS-NGO-01s	NGO-HM1	63-125	5523	Enstatite	0.0659	good_hit	83	106	orthopyroxene
	JS-NGO-01s	NGO-HM1	63-125	5524	Diopside	0.036	good_hit	90	69	clinopyroxene
	JS-NGO-01s	NGO-HM1	63-125	5525	Pyrope	0.0448	good_hit	110	11	garnet
	JS-NGO-01s	NGO-HM1	63-125	5526	Ferrosilite	0.0721	good_hit	101	54	orthopyroxene
	JS-NGO-01s	NGO-HM1	63-125	5527	Diopside	0.0631	good_hit	104	129	clinopyroxene
	JS-NGO-01s	NGO-HM1	63-125	5528	Diopside	0.0648	good_hit	107	75	clinopyroxene
	JS-NGO-01s	NGO-HM1	63-125	5529	Amphibole	0.1611	medium_hit	99	7	amphibole
	JS-NGO-01s	NGO-HM1	63-125	5530	Pyrope	0.0306	good_hit	119	116	garnet
	JS-NGO-01s	NGO-HM1	63-125	5531	Ferrosilite	0.0334	good_hit	112	75	orthopyroxene
	JS-NGO-01s	NGO-HM1	63-125	5532	Pyrope	0.0438	good_hit	119	65	garnet
	JS-NGO-01s	NGO-HM1	63-125	5533	Enstatite	0.0385	good_hit	103	35	orthopyroxene
	JS-NGO-01s	NGO-HM1	63-125	5534	Diopside	0.0511	good_hit	103	66	orthopyroxene
	JS-NGO-01s	NGO-HM1	63-125	5535	Enstatite	0.0431	good_hit	101	85	orthopyroxene
	JS-NGO-01s	NGO-HM1	63-125	5536	Almandine	0.0425	good_hit	119	198	garnet
	JS-NGO-01s	NGO-HM1	63-125	5537	Amphibole	0.1249	good_hit	92	11	amphibole
	JS-NGO-01s	NGO-HM1	63-125	5538	Annite	0.3467	no_hit	101	5	amphibole
	JS-NGO-01s	NGO-HM1	63-125	5539	Amphibole	0.3125	no_hit	93	39	amphibole
	JS-NGO-01s	NGO-HM1	63-125	5540	Edenite	0.037	good_hit	89	65	amphibole
	JS-NGO-01s	NGO-HM1	63-125	5541	Ferrosilite	0.1572	medium_hit	111	45	orthopyroxene
	JS-NGO-01s	NGO-HM1	63-125	5542			noisy spectra	88	23	amphibole
	JS-NGO-01s	NGO-HM1	63-125	5543	Diopside	0.0501	good_hit	95	37	orthopyroxene
	JS-NGO-01s	NGO-HM1	63-125	5544	Titanite	0.5639	no_hit	61	7	titanite
	JS-NGO-01s	NGO-HM1	63-125	5545	Warwickite	0.2465	ungrouped	86	6	amphibole
	JS-NGO-01s	NGO-HM1	63-125	5546	Enstatite	0.0417	good_hit	103	89	orthopyroxene
	JS-NGO-01s	NGO-HM1	63-125	5547	Anorthite	0.1153	good_hit	72	53	feldspar
	JS-NGO-01s	NGO-HM1	63-125	5548	Edenite	0.0774	good_hit	88	30	amphibole
	JS-NGO-01s	NGO-HM1	63-125	5549	Annite	0.2392	medium_hit	96	8	amphibole
	JS-NGO-01s	NGO-HM1	63-125	5550	Enstatite	0.066	good_hit	101	10	orthopyroxene
	JS-NGO-01s	NGO-HM1	63-125	5551	Ferrosilite	0.0236	good_hit	97	96	orthopyroxene
	JS-NGO-01s	NGO-HM1	63-125	5552	Annite	0.3057	no_hit	96	8	amphibole
	JS-NGO-01s	NGO-HM1	63-125	5553	Annite	0.3093	no_hit	96	6	amphibole
	JS-NGO-01s	NGO-HM1	63-125	5554	Amphibole	0.0288	good_hit	93	77	amphibole
	JS-NGO-01s	NGO-HM1	63-125	5555	Almandine	0.0466	good_hit	117	88	garnet
	JS-NGO-01s	NGO-HM1	63-125	5556	Annite	0.2807	medium_hit	86	6	amphibole
	JS-NGO-01s	NGO-HM1	63-125	5557			noisy spectra	111	63	garnet
	JS-NGO-01s	NGO-HM1	63-125	5558	Annite	0.3772	no_hit	94	9	amphibole
	JS-NGO-01s	NGO-HM1	63-125	5559	Edenite	0.0909	good_hit	89	35	amphibole
	JS-NGO-01s	NGO-HM1	63-125	5560	Amphibole	0.1923	medium_hit	89	14	amphibole
	JS-NGO-01s	NGO-HM1	63-125	5561	Diopside	0.089	good_hit	100	108	clinopyroxene
	JS-NGO-01s	NGO-HM1	63-125	5562	Pyrope	0.0475	good_hit	118	31	garnet
	JS-NGO-01s	NGO-HM1	63-125	5563	Ferrosilite	0.0707	good_hit	104	87	orthopyroxene
	JS-NGO-01s	NGO-HM1	63-125	5564	Diopside	0.0745	good_hit	105	63	clinopyroxene
	JS-NGO-01s	NGO-HM1	63-125	5565	Amphibole	0.1317	good_hit	98	26	amphibole
	JS-NGO-01s	NGO-HM1	63-125	5566	Amphibole	0.1725	medium_hit	98	12	amphibole
	JS-NGO-01s	NGO-HM1	63-125	5567	Edenite	0.0659	good_hit	92	19	amphibole
	JS-NGO-01s	NGO-HM1	63-125	5568	Magnetite	0.3474	no_hit	255	4	opaque
	JS-NGO-01s	NGO-HM1	63-125	5569	Amphibole	0.1196	good_hit	80	8	amphibole
	JS-NGO-01s	NGO-HM1	63-125	5570	Amphibole	0.1303	good_hit	87	21	amphibole
	JS-NGO-01s	NGO-HM1	63-125	5571	Edenite	0.0492	good_hit	79	25	amphibole
	JS-NGO-01s	NGO-HM1	63-125	5572	Magnetite	0.1715	medium_hit	255	4	opaque
	JS-NGO-01s	NGO-HM1	63-125	5573			noisy spectra	108	94	orthopyroxene
	JS-NGO-01s	NGO-HM1	63-125	5574	Ferrosilite	0.0697	good_hit	105	133	orthopyroxene
	JS-NGO-01s	NGO-HM1	63-125	5575	Magnetite	0.2205	medium_hit	255	4	opaque
	JS-NGO-01s	NGO-HM1	63-125	5576	Phlogopite	0.2892	medium_hit	102	7	phyllosilicate
	JS-NGO-01s	NGO-HM1	63-125	5577	Amphibole	0.12	good_hit	98	16	amphibole
	JS-NGO-01s	NGO-HM1	63-125	5578	Diopside	0.0539	good_hit	95	105	clinopyroxene
	JS-NGO-01s	NGO-HM1	63-125	5579	Diopside	0.0638	good_hit	94	74	clinopyroxene
	JS-NGO-01s	NGO-HM1	63-125	5580	Enstatite	0.0557	good_hit	99	22	orthopyroxene
	JS-NGO-01s	NGO-HM1	63-125	5581	Pyrope	0.0338	good_hit	115	178	garnet
	JS-NGO-01s	NGO-HM1	63-125	5582	Diopside	0.0597	good_hit	103	149	clinopyroxene
	JS-NGO-01s	NGO-HM1	63-125	5583	Annite	0.2886	medium_hit	90	5	amphibole
	JS-NGO-01s	NGO-HM1	63-125	5584	Amphibole	0.0891	good_hit	89	15	amphibole
	JS-NGO-01s	NGO-HM1	63-125	5585	Diopside	0.0664	good_hit	97	6	clinopyroxene
	JS-NGO-01s	NGO-HM1	63-125	5586	Amphibole	0.3193	no_hit	93	19	amphibole
	JS-NGO-01s	NGO-HM1	63-125	5587	Tyrrellite	0.175	ungrouped	254	4	opaque
	JS-NGO-01s	NGO-HM1	63-125	5588	Ilmenite	0.2546	medium_hit	246	4	opaque
	JS-NGO-01s	NGO-HM1	63-125	5589	Actinolite	0.0855	good_hit	92	68	amphibole
	JS-NGO-01s	NGO-HM1	63-125	5590	Diopside	0.0507	good_hit	104	31	orthopyroxene
	JS-NGO-01s	NGO-HM1	63-125	5591	Ferrosilite	0.0689	good_hit	107	32	orthopyroxene
	JS-NGO-01s	NGO-HM1	63-125	5592	Amphibole	0.3419	no_hit	98	9	amphibole
	JS-NGO-01s	NGO-HM1	63-125	5593	Amphibole	0.0992	good_hit	96	11	amphibole
	JS-NGO-01s	NGO-HM1	63-125	5594	Edenite	0.0859	good_hit	91	16	amphibole
	JS-NGO-01s	NGO-HM1	63-125	5595	Pyrope	0.0373	good_hit	120	21	garnet
	JS-NGO-01s	NGO-HM1	63-125	5596	Pyrope	0.0446	good_hit	118	28	garnet
	JS-NGO-01s	NGO-HM1	63-125	5597	Amphibole	0.0994	good_hit	92	28	amphibole
	JS-NGO-01s	NGO-HM1	63-125	5598	Almandine	0.043	good_hit	116	78	garnet
	JS-NGO-01s	NGO-HM1	63-125	5599	Fluorapatite	0.0876	good_hit	82	25	apatite
	JS-NGO-01s	NGO-HM1	63-125	5600	Edenite	0.1194	good_hit	86	11	amphibole
	JS-NGO-01s	NGO-HM1	63-125	5601	Enstatite	0.0917	good_hit	117	86	orthopyroxene
	JS-NGO-01s	NGO-HM1	63-125	5602	Enstatite	0.0474	good_hit	101	14	orthopyroxene
	JS-NGO-01s	NGO-HM1	63-125	5603	Amphibole	0.2032	medium_hit	85	24	amphibole
	JS-NGO-01s	NGO-HM1	63-125	5604	Diopside	0.0592	good_hit	93	36	clinopyroxene
	JS-NGO-01s	NGO-HM1	63-125	5605	Enstatite	0.0424	good_hit	105	114	orthopyroxene
	JS-NGO-01s	NGO-HM1	63-125	5606	Pyrope	0.0268	good_hit	108	93	garnet
	JS-NGO-01s	NGO-HM1	63-125	5607	Enstatite	0.0515	good_hit	104	92	orthopyroxene
	JS-NGO-01s	NGO-HM1	63-125	5608			noisy spectra	89	8	amphibole
	JS-NGO-01s	NGO-HM1	63-125	5609	Enstatite	0.0282	good_hit	101	75	orthopyroxene
	JS-NGO-01s	NGO-HM1	63-125	5610	Semseyite	0.3195	ungrouped	233	5	opaque
	JS-NGO-01s	NGO-HM1	63-125	5611	Amphibole	0.1712	medium_hit	96	45	amphibole
	JS-NGO-01s	NGO-HM1	63-125	5612	Amphibole	0.1592	medium_hit	96	14	amphibole
	JS-NGO-01s	NGO-HM1	63-125	5613	Amphibole	0.1237	good_hit	97	9	amphibole
	JS-NGO-01s	NGO-HM1	63-125	5614	Fluorapatite	0.0671	good_hit	93	137	apatite
	JS-NGO-01s	NGO-HM1	63-125	5615	Edenite	0.1001	good_hit	98	9	amphibole
	JS-NGO-01s	NGO-HM1	63-125	5616	Anorthite	0.136	good_hit	76	102	feldspar
	JS-NGO-01s	NGO-HM1	63-125	5617	Warwickite	0.3179	ungrouped	97	8	amphibole
	JS-NGO-01s	NGO-HM1	63-125	5618	Almandine	0.043	good_hit	124	57	garnet
	JS-NGO-01s	NGO-HM1	63-125	5619	Augite	0.0543	good_hit	103	18	clinopyroxene
	JS-NGO-01s	NGO-HM1	63-125	5620	Amphibole	0.0957	good_hit	93	44	amphibole
	JS-NGO-01s	NGO-HM1	63-125	5621	Pyrolusite	0.4081	ungrouped	98	113	not_identified
	JS-NGO-01s	NGO-HM1	63-125	5622	Pyrope	0.0262	good_hit	121	70	garnet
	JS-NGO-01s	NGO-HM1	63-125	5623	Enstatite	0.0715	good_hit	107	92	orthopyroxene
	JS-NGO-01s	NGO-HM1	63-125	5624	Diopside	0.0586	good_hit	98	98	clinopyroxene
	JS-NGO-01s	NGO-HM1	63-125	5625	Titanite	0.0472	good_hit	128	90	titanite
	JS-NGO-01s	NGO-HM1	63-125	5626	Tremolite	0.0427	good_hit	89	67	amphibole
	JS-NGO-01s	NGO-HM1	63-125	5627	Almandine	0.0413	good_hit	122	85	garnet
	JS-NGO-01s	NGO-HM1	63-125	5628	Albite	0.1037	good_hit	77	108	feldspar
	JS-NGO-01s	NGO-HM1	63-125	5629	Amphibole	0.0639	good_hit	94	14	amphibole
	JS-NGO-01s	NGO-HM1	63-125	5630	Enstatite	0.053	good_hit	106	78	orthopyroxene
	JS-NGO-01s	NGO-HM1	63-125	5631	Enstatite	0.0384	good_hit	102	7	orthopyroxene
	JS-NGO-01s	NGO-HM1	63-125	5632	Hessite	0.3767	ungrouped	98	5	opaque
	JS-NGO-01s	NGO-HM1	63-125	5633	Amphibole	0.1548	medium_hit	96	6	amphibole
	JS-NGO-01s	NGO-HM1	63-125	5634			noisy spectra	180	5	opaque
	JS-NGO-01s	NGO-HM1	63-125	5635	Edenite	0.0634	good_hit	94	8	amphibole
	JS-NGO-01s	NGO-HM1	63-125	5636	Amphibole	0.2157	medium_hit	95	5	amphibole
	JS-NGO-01s	NGO-HM1	63-125	5637	Pyrope	0.0359	good_hit	113	117	garnet
	JS-NGO-01s	NGO-HM1	63-125	5638	Ekatite	0.8679	ungrouped	102	150	not_identified
	JS-NGO-01s	NGO-HM1	63-125	5639	Tremolite	0.0475	good_hit	86	107	amphibole
	JS-NGO-01s	NGO-HM1	63-125	5640	PumpellyiteMg	0.6047	ungrouped	94	57	not_identified
	JS-NGO-01s	NGO-HM1	63-125	5641	Amphibole	0.2002	medium_hit	98	12	amphibole
	JS-NGO-01s	NGO-HM1	63-125	5642	Amphibole	0.2338	medium_hit	90	22	amphibole
	JS-NGO-01s	NGO-HM1	63-125	5643	Diopside	0.0593	good_hit	103	63	orthopyroxene
	JS-NGO-01s	NGO-HM1	63-125	5644	Amphibole	0.1088	good_hit	95	8	amphibole
	JS-NGO-01s	NGO-HM1	63-125	5645	Albite	0.1538	medium_hit	73	12	feldspar
	JS-NGO-01s	NGO-HM1	63-125	5646	Amphibole	0.1152	good_hit	87	15	amphibole
	JS-NGO-01s	NGO-HM1	63-125	5647	Ilmenite	0.1126	good_hit	250	4	opaque
	JS-NGO-01s	NGO-HM1	63-125	5648	Annite	0.2681	medium_hit	81	7	amphibole
	JS-NGO-01s	NGO-HM1	63-125	5649	Diopside	0.0655	good_hit	86	54	clinopyroxene
	JS-NGO-01s	NGO-HM1	63-125	5650	Amphibole	0.1259	good_hit	95	20	amphibole
	JS-NGO-01s	NGO-HM1	63-125	5651	Annite	0.2759	medium_hit	87	9	amphibole
	JS-NGO-01s	NGO-HM1	63-125	5652	Ilmenite	0.2167	medium_hit	250	5	opaque
	JS-NGO-01s	NGO-HM1	63-125	5653	Enstatite	0.0559	good_hit	103	52	orthopyroxene
	JS-NGO-01s	NGO-HM1	63-125	5654	Augite	0.0819	good_hit	101	27	clinopyroxene
	JS-NGO-01s	NGO-HM1	63-125	5655	Edenite	0.1047	good_hit	96	7	amphibole
	JS-NGO-01s	NGO-HM1	63-125	5656	Edenite	0.1137	good_hit	96	27	amphibole
	JS-NGO-01s	NGO-HM1	63-125	5657	Celsian	0.2732	medium_hit	73	86	feldspar
	JS-NGO-01s	NGO-HM1	63-125	5658	Titanite	0.1261	good_hit	156	8	titanite
	JS-NGO-01s	NGO-HM1	63-125	5659	Actinolite	0.0648	good_hit	86	12	amphibole
	JS-NGO-01s	NGO-HM1	63-125	5660	Amphibole	0.0769	good_hit	94	5	amphibole
	JS-NGO-01s	NGO-HM1	63-125	5661	Amphibole	0.1605	medium_hit	93	7	amphibole
	JS-NGO-01s	NGO-HM1	63-125	5662	Amphibole	0.1232	good_hit	99	33	amphibole
	JS-NGO-01s	NGO-HM1	63-125	5663	Diopside	0.0444	good_hit	103	40	clinopyroxene
	JS-NGO-01s	NGO-HM1	63-125	5664	Amphibole	0.1007	good_hit	93	31	amphibole
	JS-NGO-01s	NGO-HM1	63-125	5665	Pyrope	0.0358	good_hit	114	111	garnet
	JS-NGO-01s	NGO-HM1	63-125	5666	Annite	0.2875	medium_hit	95	6	amphibole
	JS-NGO-01s	NGO-HM1	63-125	5667	Erdite	0.2166	medium_hit	255	4	opaque
	JS-NGO-01s	NGO-HM1	63-125	5668	Quartz	0.0691	good_hit	82	5	quartz
	JS-NGO-01s	NGO-HM1	63-125	5669	Enstatite	0.0812	good_hit	107	28	orthopyroxene
	JS-NGO-01s	NGO-HM1	63-125	5670	Amphibole	0.1976	medium_hit	97	10	amphibole
	JS-NGO-01s	NGO-HM1	63-125	5671	Amphibole	0.1554	medium_hit	91	61	amphibole
	JS-NGO-01s	NGO-HM1	63-125	5672	Ferrosilite	0.0322	good_hit	91	111	orthopyroxene
	JS-NGO-01s	NGO-HM1	63-125	5673	Pyrope	0.0436	good_hit	118	74	garnet
	JS-NGO-01s	NGO-HM1	63-125	5674	Diopside	0.0872	good_hit	99	36	clinopyroxene
	JS-NGO-01s	NGO-HM1	63-125	5675	Amphibole	0.0968	good_hit	95	14	amphibole
	JS-NGO-01s	NGO-HM1	63-125	5676	Amphibole	0.3336	no_hit	89	24	amphibole
	JS-NGO-01s	NGO-HM1	63-125	5677			noisy spectra	68	13	phyllosilicate
	JS-NGO-01s	NGO-HM1	63-125	5678	Pyrope	0.0383	good_hit	104	105	garnet
	JS-NGO-01s	NGO-HM1	63-125	5679	Enstatite	0.0679	good_hit	99	162	orthopyroxene
	JS-NGO-01s	NGO-HM1	63-125	5680	Quartz	0.027	good_hit	70	70	quartz
	JS-NGO-01s	NGO-HM1	63-125	5681	Ferrosilite	0.0787	good_hit	104	59	orthopyroxene
	JS-NGO-01s	NGO-HM1	63-125	5682	Ferrosilite	0.0742	good_hit	95	61	orthopyroxene
	JS-NGO-01s	NGO-HM1	63-125	5683	Actinolite	0.08	good_hit	89	75	amphibole
	JS-NGO-01s	NGO-HM1	63-125	5684	Amphibole	0.1384	good_hit	98	10	amphibole
	JS-NGO-01s	NGO-HM1	63-125	5685	Amphibole	0.1449	good_hit	96	26	amphibole
	JS-NGO-01s	NGO-HM1	63-125	5686	Enstatite	0.0353	good_hit	103	130	orthopyroxene
	JS-NGO-01s	NGO-HM1	63-125	5687	Amphibole	0.0906	good_hit	93	12	amphibole
	JS-NGO-01s	NGO-HM1	63-125	5688	Amphibole	0.3709	no_hit	98	12	amphibole
	JS-NGO-01s	NGO-HM1	63-125	5689	Amphibole	0.1251	good_hit	96	11	amphibole
	JS-NGO-01s	NGO-HM1	63-125	5690	Amphibole	0.0514	good_hit	96	33	amphibole
	JS-NGO-01s	NGO-HM1	63-125	5691	Amphibole	0.1262	good_hit	94	7	amphibole
	JS-NGO-01s	NGO-HM1	63-125	5692	Enstatite	0.1009	good_hit	101	107	orthopyroxene
	JS-NGO-01s	NGO-HM1	63-125	5693	Amphibole	0.0516	good_hit	94	65	amphibole
	JS-NGO-01s	NGO-HM1	63-125	5694	Diopside	0.0454	good_hit	105	72	orthopyroxene
	JS-NGO-01s	NGO-HM1	63-125	5695	Diopside	0.0603	good_hit	98	79	clinopyroxene
	JS-NGO-01s	NGO-HM1	63-125	5696	Augite	0.0457	good_hit	100	87	clinopyroxene
	JS-NGO-01s	NGO-HM1	63-125	5697	Pyrope	0.0292	good_hit	110	62	garnet
	JS-NGO-01s	NGO-HM1	63-125	5698	Annite	0.3611	no_hit	94	5	amphibole
	JS-NGO-01s	NGO-HM1	63-125	5699	Orthoclase	0.1698	medium_hit	71	56	feldspar
	JS-NGO-01s	NGO-HM1	63-125	5700			noisy spectra	114	7	epidote
	JS-NGO-01s	NGO-HM1	63-125	5701	Diopside	0.0695	good_hit	105	95	clinopyroxene
	JS-NGO-01s	NGO-HM1	63-125	5702	Augite	0.0674	good_hit	105	56	clinopyroxene
	JS-NGO-01s	NGO-HM1	63-125	5703	Augite	0.0921	good_hit	97	20	clinopyroxene
	JS-NGO-01s	NGO-HM1	63-125	5704	Annite	0.3468	no_hit	97	9	amphibole
	JS-NGO-01s	NGO-HM1	63-125	5705	Actinolite	0.0584	good_hit	84	71	amphibole
	JS-NGO-01s	NGO-HM1	63-125	5706			noisy spectra	101	6	clinopyroxene
	JS-NGO-01s	NGO-HM1	63-125	5707	Amphibole	0.2432	medium_hit	97	33	amphibole
	JS-NGO-01s	NGO-HM1	63-125	5708	Actinolite	0.1152	good_hit	93	12	amphibole
	JS-NGO-01s	NGO-HM1	63-125	5709	Zircon	0.1012	good_hit	140	37	zircon
	JS-NGO-01s	NGO-HM1	63-125	5710	Pyrope	0.0474	good_hit	117	109	garnet
	JS-NGO-01s	NGO-HM1	63-125	5711	Ferrosilite	0.061	good_hit	94	69	orthopyroxene
	JS-NGO-01s	NGO-HM1	63-125	5712	Ferrosilite	0.0359	good_hit	90	101	orthopyroxene
	JS-NGO-01s	NGO-HM1	63-125	5713	Augite	0.054	good_hit	102	88	clinopyroxene
	JS-NGO-01s	NGO-HM1	63-125	5714	Diopside	0.0278	good_hit	99	12	clinopyroxene
	JS-NGO-01s	NGO-HM1	63-125	5715	Amphibole	0.0785	good_hit	98	21	amphibole
	JS-NGO-01s	NGO-HM1	63-125	5716	Amphibole	0.1723	medium_hit	86	9	amphibole
	JS-NGO-01s	NGO-HM1	63-125	5717	Celsian	0.1382	good_hit	70	123	feldspar
	JS-NGO-01s	NGO-HM1	63-125	5718	Edenite	0.0952	good_hit	95	18	amphibole
	JS-NGO-01s	NGO-HM1	63-125	5719	Amphibole	0.1676	medium_hit	91	11	amphibole
	JS-NGO-01s	NGO-HM1	63-125	5720	Pyrope	0.0391	good_hit	112	115	garnet
	JS-NGO-01s	NGO-HM1	63-125	5721	Enstatite	0.0464	good_hit	103	14	orthopyroxene
	JS-NGO-01s	NGO-HM1	63-125	5722	Edenite	0.0737	good_hit	93	8	amphibole
	JS-NGO-01s	NGO-HM1	63-125	5723	Amphibole	0.1739	medium_hit	94	15	amphibole
	JS-NGO-01s	NGO-HM1	63-125	5724	Pyrope	0.0258	good_hit	124	43	garnet
	JS-NGO-01s	NGO-HM1	63-125	5725	Amphibole	0.1069	good_hit	98	26	amphibole
	JS-NGO-01s	NGO-HM1	63-125	5726	Epidote	0.0571	good_hit	117	53	epidote
	JS-NGO-01s	NGO-HM1	63-125	5727	Enstatite	0.05	good_hit	108	131	orthopyroxene
	JS-NGO-01s	NGO-HM1	63-125	5728	Almandine	0.0378	good_hit	119	153	garnet
	JS-NGO-01s	NGO-HM1	63-125	5729	Ilmenite	0.3505	no_hit	255	6	opaque
	JS-NGO-01s	NGO-HM1	63-125	5730	Amphibole	0.4079	no_hit	99	5	amphibole
	JS-NGO-01s	NGO-HM1	63-125	5731	DaviditeCe	0.1025	ungrouped	244	5	rutile
	JS-NGO-01s	NGO-HM1	63-125	5732	Tremolite	0.0261	good_hit	86	69	amphibole
	JS-NGO-01s	NGO-HM1	63-125	5733	Amphibole	0.1424	good_hit	97	6	amphibole
	JS-NGO-01s	NGO-HM1	63-125	5734	Diopside	0.0474	good_hit	97	22	clinopyroxene
	JS-NGO-01s	NGO-HM1	63-125	5735	Pyrope	0.0343	good_hit	114	108	garnet
	JS-NGO-01s	NGO-HM1	63-125	5736	Amphibole	0.2442	medium_hit	94	18	amphibole
	JS-NGO-01s	NGO-HM1	63-125	5737	Amphibole	0.2183	medium_hit	98	6	amphibole
	JS-NGO-01s	NGO-HM1	63-125	5738			noisy spectra	94	14	amphibole
	JS-NGO-01s	NGO-HM1	63-125	5739	Augite	0.045	good_hit	96	22	clinopyroxene
	JS-NGO-01s	NGO-HM1	63-125	5740	Amphibole	0.2889	medium_hit	96	14	amphibole
	JS-NGO-01s	NGO-HM1	63-125	5741	Zircon	0.1045	good_hit	150	21	zircon
	JS-NGO-01s	NGO-HM1	63-125	5742	Magnetite	0.2546	medium_hit	254	4	opaque
	JS-NGO-01s	NGO-HM1	63-125	5743	Magnetite	0.268	medium_hit	255	4	opaque
	JS-NGO-01s	NGO-HM1	63-125	5744	Diopside	0.0704	good_hit	100	68	clinopyroxene
	JS-NGO-01s	NGO-HM1	63-125	5745	Diopside	0.155	medium_hit	99	146	clinopyroxene
	JS-NGO-01s	NGO-HM1	63-125	5746	Diopside	0.0786	good_hit	98	77	clinopyroxene
	JS-NGO-01s	NGO-HM1	63-125	5747	Annite	0.279	medium_hit	86	15	amphibole
	JS-NGO-01s	NGO-HM1	63-125	5748	Ferrosilite	0.0789	good_hit	94	64	orthopyroxene
	JS-NGO-01s	NGO-HM1	63-125	5749	Chamosite	0.1668	medium_hit	86	13	phyllosilicate
	JS-NGO-01s	NGO-HM1	63-125	5750	Enstatite	0.085	good_hit	98	70	orthopyroxene
	JS-NGO-01s	NGO-HM1	63-125	5751	Ferrosilite	0.0754	good_hit	95	66	orthopyroxene
	JS-NGO-01s	NGO-HM1	63-125	5752	Amphibole	0.3388	no_hit	101	7	amphibole
	JS-NGO-01s	NGO-HM1	63-125	5753	Enstatite	0.0656	good_hit	101	34	orthopyroxene
	JS-NGO-01s	NGO-HM1	63-125	5754	Amphibole	0.1118	good_hit	96	14	amphibole
	JS-NGO-01s	NGO-HM1	63-125	5755	Pyrope	0.0582	good_hit	124	192	garnet
	JS-NGO-01s	NGO-HM1	63-125	5756	Fluorapatite	0.1228	good_hit	91	114	apatite
	JS-NGO-01s	NGO-HM1	63-125	5757	Amphibole	0.1914	medium_hit	96	28	amphibole
	JS-NGO-01s	NGO-HM1	63-125	5758	Amphibole	0.1195	good_hit	96	49	amphibole
	JS-NGO-01s	NGO-HM1	63-125	5759	Pyrope	0.0433	good_hit	124	105	garnet
	JS-NGO-01s	NGO-HM1	63-125	5760	Diopside	0.0632	good_hit	102	15	orthopyroxene
	JS-NGO-01s	NGO-HM1	63-125	5761	Amphibole	0.2216	medium_hit	85	54	amphibole
	JS-NGO-01s	NGO-HM1	63-125	5762	Fluorapatite	0.0575	good_hit	89	68	apatite
	JS-NGO-01s	NGO-HM1	63-125	5763	Amphibole	0.161	medium_hit	97	24	amphibole
	JS-NGO-01s	NGO-HM1	63-125	5764	Amphibole	0.0796	good_hit	96	19	amphibole
	JS-NGO-01s	NGO-HM1	63-125	5765	Ferroedenite	0.3614	no_hit	97	14	not_identified
	JS-NGO-01s	NGO-HM1	63-125	5766	Diopside	0.062	good_hit	103	86	orthopyroxene
	JS-NGO-01s	NGO-HM1	63-125	5767	Augite	0.0417	good_hit	96	100	clinopyroxene
	JS-NGO-01s	NGO-HM1	63-125	5768	Enstatite	0.0495	good_hit	99	42	orthopyroxene
	JS-NGO-01s	NGO-HM1	63-125	5769	Epidote	0.11	good_hit	117	55	epidote
	JS-NGO-01s	NGO-HM1	63-125	5770	Amphibole	0.1235	good_hit	97	21	amphibole
	JS-NGO-01s	NGO-HM1	63-125	5771	Amphibole	0.1036	good_hit	96	10	amphibole
	JS-NGO-01s	NGO-HM1	63-125	5772	Warwickite	0.3639	ungrouped	97	7	amphibole
	JS-NGO-01s	NGO-HM1	63-125	5773	Almandine	0.1025	good_hit	111	31	garnet
	JS-NGO-01s	NGO-HM1	63-125	5774	Pyrope	0.0359	good_hit	117	55	garnet
	JS-NGO-01s	NGO-HM1	63-125	5775	Augite	0.0566	good_hit	100	84	clinopyroxene
	JS-NGO-01s	NGO-HM1	63-125	5776	Amphibole	0.2367	medium_hit	94	10	amphibole
	JS-NGO-01s	NGO-HM1	63-125	5777	Enstatite	0.075	good_hit	106	125	orthopyroxene
	JS-NGO-01s	NGO-HM1	63-125	5778	Amphibole	0.083	good_hit	100	51	amphibole
	JS-NGO-01s	NGO-HM1	63-125	5779	Augite	0.0431	good_hit	101	38	clinopyroxene
	JS-NGO-01s	NGO-HM1	63-125	5780	Epidote	0.0348	good_hit	112	29	epidote
	JS-NGO-01s	NGO-HM1	63-125	5781	Annite	0.2626	medium_hit	99	5	amphibole
	JS-NGO-01s	NGO-HM1	63-125	5782	Fluorapatite	0.1321	good_hit	90	106	apatite
	JS-NGO-01s	NGO-HM1	63-125	5783	Amphibole	0.081	good_hit	97	19	amphibole
	JS-NGO-01s	NGO-HM1	63-125	5784	Almandine	0.045	good_hit	118	106	garnet
	JS-NGO-01s	NGO-HM1	63-125	5785	Amphibole	0.0572	good_hit	95	72	amphibole
	JS-NGO-01s	NGO-HM1	63-125	5786	Diopside	0.0592	good_hit	98	32	clinopyroxene
	JS-NGO-01s	NGO-HM1	63-125	5787	Annite	0.2974	medium_hit	87	7	amphibole
	JS-NGO-01s	NGO-HM1	63-125	5788	Ferrosilite	0.0694	good_hit	86	42	orthopyroxene
	JS-NGO-01s	NGO-HM1	63-125	5789	Amphibole	0.195	medium_hit	88	11	amphibole
	JS-NGO-01s	NGO-HM1	63-125	5790	Edenite	0.1465	good_hit	93	40	amphibole
	JS-NGO-01s	NGO-HM1	63-125	5791	Magnetite	0.0597	good_hit	255	5	opaque
	JS-NGO-01s	NGO-HM1	63-125	5792	Ferrosilite	0.0496	good_hit	96	54	orthopyroxene
	JS-NGO-01s	NGO-HM1	63-125	5793	Enstatite	0.037	good_hit	102	51	orthopyroxene
	JS-NGO-01s	NGO-HM1	63-125	5794	Annite	0.2405	medium_hit	96	16	amphibole
	JS-NGO-01s	NGO-HM1	63-125	5795	Ferrosilite	0.0542	good_hit	100	63	orthopyroxene
	JS-NGO-01s	NGO-HM1	63-125	5796	Amphibole	0.1219	good_hit	96	28	amphibole
	JS-NGO-01s	NGO-HM1	63-125	5797	Enstatite	0.4035	no_hit	103	38	orthopyroxene
	JS-NGO-01s	NGO-HM1	63-125	5798	Annite	0.2501	medium_hit	97	5	amphibole
	JS-NGO-01s	NGO-HM1	63-125	5799	Amphibole	0.2056	medium_hit	96	46	amphibole
	JS-NGO-01s	NGO-HM1	63-125	5800	Edenite	0.1583	medium_hit	94	13	amphibole
	JS-NGO-01s	NGO-HM1	63-125	5801	Pyrope	0.0423	good_hit	121	63	garnet
	JS-NGO-01s	NGO-HM1	63-125	5802	Ilmenite	0.2026	medium_hit	255	4	opaque
	JS-NGO-01s	NGO-HM1	63-125	5803	Enstatite	0.1063	good_hit	100	117	orthopyroxene
	JS-NGO-01s	NGO-HM1	63-125	5804	Edenite	0.1072	good_hit	96	18	amphibole
	JS-NGO-01s	NGO-HM1	63-125	5805	Enstatite	0.052	good_hit	106	78	orthopyroxene
	JS-NGO-01s	NGO-HM1	63-125	5806	Annite	0.2554	medium_hit	91	18	amphibole
	JS-NGO-01s	NGO-HM1	63-125	5807	Amphibole	0.1735	medium_hit	91	28	amphibole
	JS-NGO-01s	NGO-HM1	63-125	5808	Pyrope	0.0658	good_hit	117	58	garnet
	JS-NGO-01s	NGO-HM1	63-125	5809	Amphibole	0.1559	medium_hit	96	11	amphibole
	JS-NGO-01s	NGO-HM1	63-125	5810	Amphibole	0.2605	medium_hit	99	9	amphibole
	JS-NGO-01s	NGO-HM1	63-125	5811	Amphibole	0.0998	good_hit	96	21	amphibole
	JS-NGO-01s	NGO-HM1	63-125	5812	Warwickite	0.3365	ungrouped	99	6	amphibole
	JS-NGO-01s	NGO-HM1	63-125	5813	Amphibole	0.3208	no_hit	101	8	amphibole
	JS-NGO-01s	NGO-HM1	63-125	5814	Titanite	0.3009	no_hit	138	70	titanite
	JS-NGO-01s	NGO-HM1	63-125	5815	Diopside	0.0634	good_hit	99	61	clinopyroxene
	JS-NGO-01s	NGO-HM1	63-125	5816	Epidote	0.1104	good_hit	106	42	epidote
	JS-NGO-01s	NGO-HM1	63-125	5817	Almandine	0.0438	good_hit	103	43	garnet
	JS-NGO-01s	NGO-HM1	63-125	5818	Edenite	0.113	good_hit	88	5	amphibole
	JS-NGO-01s	NGO-HM1	63-125	5819	Diopside	0.0667	good_hit	94	37	orthopyroxene
	JS-NGO-01s	NGO-HM1	63-125	5820	Quartz	0.0355	good_hit	70	32	quartz
	JS-NGO-01s	NGO-HM1	63-125	5821	Diopside	0.0664	good_hit	65	5	clinopyroxene
	JS-NGO-01s	NGO-HM1	63-125	5822	Fluorapatite	0.1068	good_hit	90	132	apatite
	JS-NGO-01s	NGO-HM1	63-125	5823	Diopside	0.0341	good_hit	107	73	clinopyroxene
	JS-NGO-01s	NGO-HM1	63-125	5824	Enstatite	0.0297	good_hit	100	80	orthopyroxene
	JS-NGO-01s	NGO-HM1	63-125	5825	Enstatite	0.0709	good_hit	104	45	orthopyroxene
	JS-NGO-01s	NGO-HM1	63-125	5826	Ferrosilite	0.0176	good_hit	98	164	orthopyroxene
	JS-NGO-01s	NGO-HM1	63-125	5827	Annite	0.3165	no_hit	93	10	amphibole
	JS-NGO-01s	NGO-HM1	63-125	5828	Ilmenite	0.1542	medium_hit	239	6	opaque
	JS-NGO-01s	NGO-HM1	63-125	5829	Amphibole	0.3004	no_hit	98	10	amphibole
	JS-NGO-01s	NGO-HM1	63-125	5830	Pyrope	0.0251	good_hit	127	16	garnet
	JS-NGO-01s	NGO-HM1	63-125	5831	Fluorapatite	0.114	good_hit	93	114	apatite
	JS-NGO-01s	NGO-HM1	63-125	5832	Ferrosilite	0.0437	good_hit	106	50	orthopyroxene
	JS-NGO-01s	NGO-HM1	63-125	5833	Ilmenite	0.2271	medium_hit	250	7	opaque
	JS-NGO-01s	NGO-HM1	63-125	5834	Enstatite	0.0419	good_hit	99	120	orthopyroxene
	JS-NGO-01s	NGO-HM1	63-125	5835	Amphibole	0.1325	good_hit	93	55	amphibole
	JS-NGO-01s	NGO-HM1	63-125	5836	Annite	0.3171	no_hit	100	10	amphibole
	JS-NGO-01s	NGO-HM1	63-125	5837	Ferrosilite	0.083	good_hit	107	239	orthopyroxene
	JS-NGO-01s	NGO-HM1	63-125	5838	Actinolite	0.0553	good_hit	95	35	amphibole
	JS-NGO-01s	NGO-HM1	63-125	5839	Andradite	0.3751	no_hit	122	106	garnet
	JS-NGO-01s	NGO-HM1	63-125	5840	Amphibole	0.1756	medium_hit	95	55	amphibole
	JS-NGO-01s	NGO-HM1	63-125	5841	Quartz	0.0266	good_hit	73	97	quartz
	JS-NGO-01s	NGO-HM1	63-125	5842	Gudmundite	0.1532	ungrouped	171	5	opaque
	JS-NGO-01s	NGO-HM1	63-125	5843	Pyrope	0.076	good_hit	115	16	garnet
	JS-NGO-01s	NGO-HM1	63-125	5844	Leiteite	0.0556	ungrouped	83	5	opaque
	JS-NGO-01s	NGO-HM1	63-125	5845	Edenite	0.1123	good_hit	100	6	amphibole
	JS-NGO-01s	NGO-HM1	63-125	5846	Sillimanite	0.101	good_hit	92	8	sillimanite
	JS-NGO-01s	NGO-HM1	63-125	5847	Amphibole	0.2048	medium_hit	97	23	amphibole
	JS-NGO-01s	NGO-HM1	63-125	5848	Enstatite	0.0351	good_hit	105	35	orthopyroxene
	JS-NGO-01s	NGO-HM1	63-125	5849	Amphibole	0.1443	good_hit	84	7	amphibole
	JS-NGO-01s	NGO-HM1	63-125	5850	Enstatite	0.1596	medium_hit	96	178	orthopyroxene
	JS-NGO-01s	NGO-HM1	63-125	5851	Pargasite	0.2482	medium_hit	95	8	amphibole
	JS-NGO-01s	NGO-HM1	63-125	5852	Enstatite	0.0632	good_hit	105	32	orthopyroxene
	JS-NGO-01s	NGO-HM1	63-125	5853	Almandine	0.0459	good_hit	110	63	garnet
	JS-NGO-01s	NGO-HM1	63-125	5854	Amphibole	0.1269	good_hit	87	13	amphibole
	JS-NGO-01s	NGO-HM1	63-125	5855	Diopside	0.0579	good_hit	98	14	clinopyroxene
	JS-NGO-01s	NGO-HM1	63-125	5856	Pyrope	0.0373	good_hit	115	101	garnet
	JS-NGO-01s	NGO-HM1	63-125	5857	Amphibole	0.1199	good_hit	83	8	amphibole
	JS-NGO-01s	NGO-HM1	63-125	5858	Ferrosilite	0.0615	good_hit	99	109	orthopyroxene
	JS-NGO-01s	NGO-HM1	63-125	5859	Actinolite	0.0683	good_hit	85	39	amphibole
	JS-NGO-01s	NGO-HM1	63-125	5860	Amphibole	0.2998	medium_hit	97	10	amphibole
	JS-NGO-01s	NGO-HM1	63-125	5861	Enstatite	0.0449	good_hit	108	56	orthopyroxene
	JS-NGO-01s	NGO-HM1	63-125	5862	Amphibole	0.0513	good_hit	96	12	amphibole
	JS-NGO-01s	NGO-HM1	63-125	5863	Enstatite	0.0696	good_hit	100	145	orthopyroxene
	JS-NGO-01s	NGO-HM1	63-125	5864	Edenite	0.1013	good_hit	98	32	amphibole
	JS-NGO-01s	NGO-HM1	63-125	5865	Edenite	0.0987	good_hit	97	12	amphibole
	JS-NGO-01s	NGO-HM1	63-125	5866	Amphibole	0.1338	good_hit	92	26	amphibole
	JS-NGO-01s	NGO-HM1	63-125	5867	Ferrosilite	0.0855	good_hit	102	17	orthopyroxene
	JS-NGO-01s	NGO-HM1	63-125	5868	Nadorite	0.2318	ungrouped	255	5	opaque
	JS-NGO-01s	NGO-HM1	63-125	5869	Ferrosilite	0.0325	good_hit	101	37	orthopyroxene
	JS-NGO-01s	NGO-HM1	63-125	5870	Augite	0.0635	good_hit	93	6	clinopyroxene
	JS-NGO-01s	NGO-HM1	63-125	5871	Pyrope	0.0474	good_hit	115	106	garnet
	JS-NGO-01s	NGO-HM1	63-125	5872	Enstatite	0.0312	good_hit	108	186	orthopyroxene
	JS-NGO-01s	NGO-HM1	63-125	5873	Quartz	0.2169	medium_hit	74	10	quartz
	JS-NGO-01s	NGO-HM1	63-125	5874	Almandine	0.0485	good_hit	121	67	garnet
	JS-NGO-01s	NGO-HM1	63-125	5875	Amphibole	0.2677	medium_hit	95	26	amphibole
	JS-NGO-01s	NGO-HM1	63-125	5876	Warwickite	0.4232	ungrouped	103	6	amphibole
	JS-NGO-01s	NGO-HM1	63-125	5877	Enstatite	0.0678	good_hit	95	47	orthopyroxene
	JS-NGO-01s	NGO-HM1	63-125	5878	Pyrope	0.0459	good_hit	119	161	garnet
	JS-NGO-01s	NGO-HM1	63-125	5879	Sillimanite	0.015	good_hit	95	69	sillimanite
	JS-NGO-01s	NGO-HM1	63-125	5880	Amphibole	0.1108	good_hit	94	14	amphibole
	JS-NGO-01s	NGO-HM1	63-125	5881	Pyrope	0.0284	good_hit	99	123	garnet
	JS-NGO-01s	NGO-HM1	63-125	5882	Enstatite	0.0528	good_hit	102	105	orthopyroxene
	JS-NGO-01s	NGO-HM1	63-125	5883	Augite	0.0445	good_hit	107	79	clinopyroxene
	JS-NGO-01s	NGO-HM1	63-125	5884	Enstatite	0.0792	good_hit	109	122	orthopyroxene
	JS-NGO-01s	NGO-HM1	63-125	5885	Almandine	0.0427	good_hit	123	150	garnet
	JS-NGO-01s	NGO-HM1	63-125	5886	Annite	0.3263	no_hit	89	7	amphibole
	JS-NGO-01s	NGO-HM1	63-125	5887	Amphibole	0.1675	medium_hit	90	12	amphibole
	JS-NGO-01s	NGO-HM1	63-125	5888	Amphibole	0.1795	medium_hit	83	21	amphibole
	JS-NGO-01s	NGO-HM1	63-125	5889	Pyrope	0.0224	good_hit	108	89	garnet
	JS-NGO-01s	NGO-HM1	63-125	5890	Annite	0.2726	medium_hit	97	24	amphibole
	JS-NGO-01s	NGO-HM1	63-125	5891	Amphibole	0.1199	good_hit	91	19	amphibole
	JS-NGO-01s	NGO-HM1	63-125	5892	Pyrope	0.0354	good_hit	112	89	garnet
	JS-NGO-01s	NGO-HM1	63-125	5893	Diopside	0.0564	good_hit	105	56	clinopyroxene
	JS-NGO-01s	NGO-HM1	63-125	5894	Edenite	0.0856	good_hit	89	48	amphibole
	JS-NGO-01s	NGO-HM1	63-125	5895	Edenite	0.0706	good_hit	95	11	amphibole
	JS-NGO-01s	NGO-HM1	63-125	5896	Enstatite	0.3005	no_hit	106	42	orthopyroxene
	JS-NGO-01s	NGO-HM1	63-125	5897	Ferrosilite	0.041	good_hit	106	54	orthopyroxene
	JS-NGO-01s	NGO-HM1	63-125	5898	Amphibole	0.2155	medium_hit	95	38	amphibole
	JS-NGO-01s	NGO-HM1	63-125	5899	Amphibole	0.1656	medium_hit	94	12	amphibole
	JS-NGO-01s	NGO-HM1	63-125	5900	Almandine	0.0607	good_hit	118	23	garnet
	JS-NGO-01s	NGO-HM1	63-125	5901	Enstatite	0.1059	good_hit	100	27	orthopyroxene
	JS-NGO-01s	NGO-HM1	63-125	5902	Amphibole	0.3073	no_hit	98	23	amphibole
	JS-NGO-01s	NGO-HM1	63-125	5903	Pyrope	0.0309	good_hit	121	50	garnet
	JS-NGO-01s	NGO-HM1	63-125	5904	Almandine	0.0471	good_hit	117	66	garnet
	JS-NGO-01s	NGO-HM1	63-125	5905	Pyrope	0.0522	good_hit	115	91	garnet
	JS-NGO-01s	NGO-HM1	63-125	5906	Edenite	0.0804	good_hit	93	10	amphibole
	JS-NGO-01s	NGO-HM1	63-125	5907	Pyrope	0.0323	good_hit	119	70	garnet
	JS-NGO-01s	NGO-HM1	63-125	5908	Amphibole	0.3425	no_hit	95	6	amphibole
	JS-NGO-01s	NGO-HM1	63-125	5909	Amphibole	0.217	medium_hit	89	5	amphibole
	JS-NGO-01s	NGO-HM1	63-125	5910	Ferrosilite	0.0243	good_hit	102	85	orthopyroxene
	JS-NGO-01s	NGO-HM1	63-125	5911	Nadorite	0.279	ungrouped	242	4	opaque
	JS-NGO-01s	NGO-HM1	63-125	5912	Semseyite	0.2093	ungrouped	240	5	opaque
	JS-NGO-01s	NGO-HM1	63-125	5913	Ferrosilite	0.0645	good_hit	102	56	orthopyroxene
	JS-NGO-01s	NGO-HM1	63-125	5914	Amphibole	0.066	good_hit	96	21	amphibole
	JS-NGO-01s	NGO-HM1	63-125	5915	Edenite	0.2305	medium_hit	92	33	amphibole
	JS-NGO-01s	NGO-HM1	63-125	5916	Diopside	0.0674	good_hit	92	83	clinopyroxene
	JS-NGO-01s	NGO-HM1	63-125	5917	Diopside	0.0612	good_hit	101	22	clinopyroxene
	JS-NGO-01s	NGO-HM1	63-125	5918	Diopside	0.0497	good_hit	88	87	clinopyroxene
	JS-NGO-01s	NGO-HM1	63-125	5919	Ilmenite	0.2016	medium_hit	223	4	opaque
	JS-NGO-01s	NGO-HM1	63-125	5920	Amphibole	0.1663	medium_hit	85	10	amphibole
	JS-NGO-01s	NGO-HM1	63-125	5921	Sillimanite	0.0566	good_hit	95	146	sillimanite
	JS-NGO-01s	NGO-HM1	63-125	5922	Edenite	0.2943	medium_hit	88	16	amphibole
	JS-NGO-01s	NGO-HM1	63-125	5923	Ilmenite	0.2614	medium_hit	255	5	opaque
	JS-NGO-01s	NGO-HM1	63-125	5924	Edenite	0.1543	medium_hit	89	8	amphibole
	JS-NGO-01s	NGO-HM1	63-125	5925	Amphibole	0.1096	good_hit	93	8	amphibole
	JS-NGO-01s	NGO-HM1	63-125	5926	Amphibole	0.2105	medium_hit	95	12	amphibole
	JS-NGO-01s	NGO-HM1	63-125	5927	Magnetite	0.0281	good_hit	255	4	opaque
	JS-NGO-01s	NGO-HM1	63-125	5928	Ferrosilite	0.0753	good_hit	108	48	orthopyroxene
	JS-NGO-01s	NGO-HM1	63-125	5929	Pyrope	0.0427	good_hit	114	100	garnet
	JS-NGO-01s	NGO-HM1	63-125	5930	Almandine	0.0446	good_hit	116	74	garnet
	JS-NGO-01s	NGO-HM1	63-125	5931	Enstatite	0.0525	good_hit	109	37	orthopyroxene
	JS-NGO-01s	NGO-HM1	63-125	5932	Amphibole	0.156	medium_hit	98	15	amphibole
	JS-NGO-01s	NGO-HM1	63-125	5933	Ferrosilite	0.0493	good_hit	80	56	orthopyroxene
	JS-NGO-01s	NGO-HM1	63-125	5934	Edenite	0.048	good_hit	78	31	amphibole
	JS-NGO-01s	NGO-HM1	63-125	5935	Amphibole	0.2401	medium_hit	85	9	amphibole
	JS-NGO-01s	NGO-HM1	63-125	5936	Amphibole	0.0637	good_hit	85	65	amphibole
	JS-NGO-01s	NGO-HM1	63-125	5937	Amphibole	0.0918	good_hit	94	33	amphibole
	JS-NGO-01s	NGO-HM1	63-125	5938	Magnetite	0.024	good_hit	255	4	opaque
	JS-NGO-01s	NGO-HM1	63-125	5939	Annite	0.2948	medium_hit	97	22	amphibole
	JS-NGO-01s	NGO-HM1	63-125	5940	Pyrope	0.0326	good_hit	109	112	garnet
	JS-NGO-01s	NGO-HM1	63-125	5941	Edenite	0.0614	good_hit	84	13	amphibole
	JS-NGO-01s	NGO-HM1	63-125	5942	Diopside	0.0711	good_hit	99	56	clinopyroxene
	JS-NGO-01s	NGO-HM1	63-125	5943	Rutile	0.0276	good_hit	255	4	rutile
	JS-NGO-01s	NGO-HM1	63-125	5944	Diopside	0.0515	good_hit	93	64	clinopyroxene
	JS-NGO-01s	NGO-HM1	63-125	5945	Amphibole	0.0618	good_hit	89	5	amphibole
	JS-NGO-01s	NGO-HM1	63-125	5946	Amphibole	0.2584	medium_hit	95	10	amphibole
	JS-NGO-01s	NGO-HM1	63-125	5947	Pyrope	0.0348	good_hit	114	122	garnet
	JS-NGO-01s	NGO-HM1	63-125	5948	Enstatite	0.0365	good_hit	104	58	orthopyroxene
	JS-NGO-01s	NGO-HM1	63-125	5949	Grossular	0.0377	good_hit	113	81	garnet
	JS-NGO-01s	NGO-HM1	63-125	5950	Pyrope	0.0507	good_hit	119	69	garnet
	JS-NGO-01s	NGO-HM1	63-125	5951	Amphibole	0.1494	good_hit	98	13	amphibole
	JS-NGO-01s	NGO-HM1	63-125	5952	Amphibole	0.1576	medium_hit	100	4	amphibole
	JS-NGO-01s	NGO-HM1	63-125	5953	Edenite	0.1299	good_hit	100	16	amphibole
	JS-NGO-01s	NGO-HM1	63-125	5954	Amphibole	0.2902	medium_hit	100	4	amphibole
	JS-NGO-01s	NGO-HM1	63-125	5955	Amphibole	0.1483	good_hit	95	6	amphibole
	JS-NGO-01s	NGO-HM1	63-125	5956	Amphibole	0.2685	medium_hit	95	7	amphibole
	JS-NGO-01s	NGO-HM1	63-125	5957	Edenite	0.0887	good_hit	90	35	amphibole
	JS-NGO-01s	NGO-HM1	63-125	5958	Pyrope	0.0493	good_hit	116	15	garnet
	JS-NGO-01s	NGO-HM1	63-125	5959	Edenite	0.1868	medium_hit	82	6	amphibole
	JS-NGO-01s	NGO-HM1	63-125	5960	Amphibole	0.0944	good_hit	96	30	amphibole
	JS-NGO-01s	NGO-HM1	63-125	5961	Enstatite	0.0575	good_hit	108	25	orthopyroxene
	JS-NGO-01s	NGO-HM1	63-125	5962			noisy spectra	103	13	orthopyroxene
	JS-NGO-01s	NGO-HM1	63-125	5963	Quartz	0.0242	good_hit	76	32	quartz
	JS-NGO-01s	NGO-HM1	63-125	5964	Pyrope	0.0413	good_hit	113	70	garnet
	JS-NGO-01s	NGO-HM1	63-125	5965	Ferrosilite	0.0319	good_hit	101	35	orthopyroxene
	JS-NGO-01s	NGO-HM1	63-125	5966	Edenite	0.1469	good_hit	101	4	amphibole
	JS-NGO-01s	NGO-HM1	63-125	5967	Ferrosilite	0.0466	good_hit	104	103	orthopyroxene
	JS-NGO-01s	NGO-HM1	63-125	5968	Enstatite	0.0455	good_hit	102	40	orthopyroxene
	JS-NGO-01s	NGO-HM1	63-125	5969	Almandine	0.0178	good_hit	117	6	garnet
	JS-NGO-01s	NGO-HM1	63-125	5970	Edenite	0.2182	medium_hit	86	25	amphibole
	JS-NGO-01s	NGO-HM1	63-125	5971	Amphibole	0.1784	medium_hit	97	7	amphibole
	JS-NGO-01s	NGO-HM1	63-125	5972	Amphibole	0.2234	medium_hit	89	7	amphibole
	JS-NGO-01s	NGO-HM1	63-125	5973	Albite	0.1133	good_hit	63	19	feldspar
	JS-NGO-01s	NGO-HM1	63-125	5974	Fluorapatite	0.05	good_hit	89	27	apatite
	JS-NGO-01s	NGO-HM1	63-125	5975	Amphibole	0.0904	good_hit	96	18	amphibole
	JS-NGO-01s	NGO-HM1	63-125	5976	Pyrope	0.0379	good_hit	119	75	garnet
	JS-NGO-01s	NGO-HM1	63-125	5977	Edenite	0.0959	good_hit	90	31	amphibole
	JS-NGO-01s	NGO-HM1	63-125	5978	Amphibole	0.1124	good_hit	87	12	amphibole
	JS-NGO-01s	NGO-HM1	63-125	5979	Pyrope	0.0377	good_hit	108	71	garnet
	JS-NGO-01s	NGO-HM1	63-125	5980	Actinolite	0.085	good_hit	88	44	amphibole
	JS-NGO-01s	NGO-HM1	63-125	5981	Enstatite	0.0681	good_hit	109	105	orthopyroxene
	JS-NGO-01s	NGO-HM1	63-125	5982	Amphibole	0.5433	no_hit	97	7	amphibole
	JS-NGO-01s	NGO-HM1	63-125	5983	Amphibole	0.1108	good_hit	99	12	amphibole
	JS-NGO-01s	NGO-HM1	63-125	5984	Amphibole	0.1234	good_hit	96	26	amphibole
	JS-NGO-01s	NGO-HM1	63-125	5985	Enstatite	0.0536	good_hit	105	84	orthopyroxene
	JS-NGO-01s	NGO-HM1	63-125	5986	Amphibole	0.1142	good_hit	91	7	amphibole
	JS-NGO-01s	NGO-HM1	63-125	5987	Annite	0.3154	no_hit	100	4	amphibole
	JS-NGO-01s	NGO-HM1	63-125	5988	Diopside	0.0619	good_hit	104	33	clinopyroxene
	JS-NGO-01s	NGO-HM1	63-125	5989	Pyrope	0.0196	good_hit	123	108	garnet
	JS-NGO-01s	NGO-HM1	63-125	5990	Pyrope	0.0428	good_hit	124	133	garnet
	JS-NGO-01s	NGO-HM1	63-125	5991	Diopside	0.0749	good_hit	102	37	clinopyroxene
	JS-NGO-01s	NGO-HM1	63-125	5992	Ferrosilite	0.0369	good_hit	104	58	orthopyroxene
	JS-NGO-01s	NGO-HM1	63-125	5993	Diopside	0.0355	good_hit	104	87	clinopyroxene
	JS-NGO-01s	NGO-HM1	63-125	5994	Edenite	0.064	good_hit	94	21	amphibole
	JS-NGO-01s	NGO-HM1	63-125	5995	Annite	0.2772	medium_hit	98	4	amphibole
	JS-NGO-01s	NGO-HM1	63-125	5996	Amphibole	0.0956	good_hit	91	8	amphibole
	JS-NGO-01s	NGO-HM1	63-125	5997	Pyrope	0.3651	no_hit	114	33	garnet
	JS-NGO-01s	NGO-HM1	63-125	5998	Amphibole	0.2473	medium_hit	93	9	amphibole
	JS-NGO-01s	NGO-HM1	63-125	5999	Pyrope	0.0292	good_hit	118	92	garnet
	JS-NGO-01s	NGO-HM1	63-125	6000			noisy spectra	102	36	clinopyroxene
	JS-NGO-01s	NGO-HM1	63-125	6001	Pyrope	0.0322	good_hit	119	129	garnet
	JS-NGO-01s	NGO-HM1	63-125	6002	Diopside	0.0649	good_hit	99	14	clinopyroxene
	JS-NGO-01s	NGO-HM1	63-125	6003	Pyrope	0.0362	good_hit	112	11	garnet
	JS-NGO-01s	NGO-HM1	63-125	6004	Ilmenite	0.2321	medium_hit	254	5	opaque
	JS-NGO-01s	NGO-HM1	63-125	6005	Amphibole	0.0558	good_hit	87	20	amphibole
	JS-NGO-01s	NGO-HM1	63-125	6006	Amphibole	0.0766	good_hit	96	17	amphibole
	JS-NGO-01s	NGO-HM1	63-125	6007	Enstatite	0.076	good_hit	108	53	orthopyroxene
	JS-NGO-01s	NGO-HM1	63-125	6008	Magnetite	0.0727	good_hit	234	5	opaque
	JS-NGO-01s	NGO-HM1	63-125	6009	Amphibole	0.1589	medium_hit	86	7	amphibole
	JS-NGO-01s	NGO-HM1	63-125	6010	Pyrope	0.022	good_hit	114	121	garnet
	JS-NGO-01s	NGO-HM1	63-125	6011	Amphibole	0.2896	medium_hit	90	9	amphibole
	JS-NGO-01s	NGO-HM1	63-125	6012			noisy spectra	83	7	phyllosilicate
	JS-NGO-01s	NGO-HM1	63-125	6013	Ferrosilite	0.0568	good_hit	105	39	orthopyroxene
	JS-NGO-01s	NGO-HM1	63-125	6014	Pyroxferroite	0.2946	ungrouped	255	5	opaque
	JS-NGO-01s	NGO-HM1	63-125	6015	Almandine	0.0485	good_hit	115	40	garnet
	JS-NGO-01s	NGO-HM1	63-125	6016	Enstatite	0.0512	good_hit	105	89	orthopyroxene
	JS-NGO-01s	NGO-HM1	63-125	6017	Pyrope	0.022	good_hit	111	202	garnet
	JS-NGO-01s	NGO-HM1	63-125	6018	Edenite	0.3778	no_hit	83	5	amphibole
	JS-NGO-01s	NGO-HM1	63-125	6019	Edenite	0.0822	good_hit	97	7	amphibole
	JS-NGO-01s	NGO-HM1	63-125	6020			noisy spectra	69	13	amphibole
	JS-NGO-01s	NGO-HM1	63-125	6021	Amphibole	0.2734	medium_hit	98	5	amphibole
	JS-NGO-01s	NGO-HM1	63-125	6022	Ferrosilite	0.0549	good_hit	94	84	orthopyroxene
	JS-NGO-01s	NGO-HM1	63-125	6023	Amphibole	0.1887	medium_hit	92	24	amphibole
	JS-NGO-01s	NGO-HM1	63-125	6024	Semseyite	0.2144	ungrouped	248	4	opaque
	JS-NGO-01s	NGO-HM1	63-125	6025	Annite	0.29	medium_hit	96	5	amphibole
	JS-NGO-01s	NGO-HM1	63-125	6026	Pyrope	0.0271	good_hit	123	225	garnet
	JS-NGO-01s	NGO-HM1	63-125	6027	Spessartine	0.0555	good_hit	121	71	garnet
	JS-NGO-01s	NGO-HM1	63-125	6028	Pyrope	0.0361	good_hit	116	181	garnet
	JS-NGO-01s	NGO-HM1	63-125	6029	Pyrope	0.0326	good_hit	109	159	garnet
	JS-NGO-01s	NGO-HM1	63-125	6030	Amphibole	0.2082	medium_hit	91	11	amphibole
	JS-NGO-01s	NGO-HM1	63-125	6031	Annite	0.2639	medium_hit	92	6	amphibole
	JS-NGO-01s	NGO-HM1	63-125	6032	Amphibole	0.2733	medium_hit	94	33	amphibole
	JS-NGO-01s	NGO-HM1	63-125	6033	Prehnite	0.166	medium_hit	88	161	prehnite
	JS-NGO-01s	NGO-HM1	63-125	6034	Enstatite	0.0387	good_hit	108	80	orthopyroxene
	JS-NGO-01s	NGO-HM1	63-125	6035	Augite	0.0747	good_hit	102	74	clinopyroxene
	JS-NGO-01s	NGO-HM1	63-125	6036	Amphibole	0.3045	no_hit	94	4	amphibole
	JS-NGO-01s	NGO-HM1	63-125	6037	Amphibole	0.1728	medium_hit	93	5	amphibole
	JS-NGO-01s	NGO-HM1	63-125	6038	Amphibole	0.3285	no_hit	97	4	amphibole
	JS-NGO-01s	NGO-HM1	63-125	6039	Amphibole	0.0544	good_hit	96	20	amphibole
	JS-NGO-01s	NGO-HM1	63-125	6040	Sillimanite	0.0448	good_hit	97	129	sillimanite
	JS-NGO-01s	NGO-HM1	63-125	6041	Diopside	0.0568	good_hit	102	72	clinopyroxene
	JS-NGO-01s	NGO-HM1	63-125	6042	Amphibole	0.1147	good_hit	94	9	amphibole
	JS-NGO-01s	NGO-HM1	63-125	6043	Amphibole	0.0982	good_hit	89	22	amphibole
	JS-NGO-01s	NGO-HM1	63-125	6044	Augite	0.0577	good_hit	101	50	clinopyroxene
	JS-NGO-01s	NGO-HM1	63-125	6045	Amphibole	0.2421	medium_hit	91	8	amphibole
	JS-NGO-01s	NGO-HM1	63-125	6046			noisy spectra	95	5	amphibole
	JS-NGO-01s	NGO-HM1	63-125	6047	Diopside	0.0413	good_hit	104	102	clinopyroxene
	JS-NGO-01s	NGO-HM1	63-125	6048	Amphibole	0.1869	medium_hit	92	10	amphibole
	JS-NGO-01s	NGO-HM1	63-125	6049	Pyrope	0.0359	good_hit	113	132	garnet
	JS-NGO-01s	NGO-HM1	63-125	6050	Pyrope	0.0384	good_hit	116	98	garnet
	JS-NGO-01s	NGO-HM1	63-125	6051	Sillimanite	0.0468	good_hit	88	107	sillimanite
	JS-NGO-01s	NGO-HM1	63-125	6052	Amphibole	0.1451	good_hit	86	33	amphibole
	JS-NGO-01s	NGO-HM1	63-125	6053	Amphibole	0.0931	good_hit	91	13	amphibole
	JS-NGO-01s	NGO-HM1	63-125	6054	Albite	0.0982	good_hit	75	90	feldspar
	JS-NGO-01s	NGO-HM1	63-125	6055	Amphibole	0.1099	good_hit	100	20	amphibole
	JS-NGO-01s	NGO-HM1	63-125	6056	Edenite	0.0968	good_hit	94	56	amphibole
	JS-NGO-01s	NGO-HM1	63-125	6057	Amphibole	0.3669	no_hit	93	10	amphibole
	JS-NGO-01s	NGO-HM1	63-125	6058	Pyrope	0.0388	good_hit	104	32	garnet
	JS-NGO-01s	NGO-HM1	63-125	6059	Amphibole	0.1042	good_hit	79	28	amphibole
	JS-NGO-01s	NGO-HM1	63-125	6060	Diopside	0.0402	good_hit	105	46	orthopyroxene
	JS-NGO-01s	NGO-HM1	63-125	6061	Amphibole	0.0615	good_hit	93	25	amphibole
	JS-NGO-01s	NGO-HM1	63-125	6062	Almandine	0.0519	good_hit	121	104	garnet
	JS-NGO-01s	NGO-HM1	63-125	6063	Amphibole	0.1885	medium_hit	96	20	amphibole
	JS-NGO-01s	NGO-HM1	63-125	6064	Ferrosilite	0.0454	good_hit	101	51	orthopyroxene
	JS-NGO-01s	NGO-HM1	63-125	6065	Enstatite	0.0349	good_hit	106	101	orthopyroxene
	JS-NGO-01s	NGO-HM1	63-125	6066	Diopside	0.042	good_hit	107	104	orthopyroxene
	JS-NGO-01s	NGO-HM1	63-125	6067	Diopside	0.0714	good_hit	88	95	clinopyroxene
	JS-NGO-01s	NGO-HM1	63-125	6068	Amphibole	0.1219	good_hit	80	14	amphibole
	JS-NGO-01s	NGO-HM1	63-125	6069	Amphibole	0.1142	good_hit	86	6	amphibole
	JS-NGO-01s	NGO-HM1	63-125	6070	Diopside	0.0599	good_hit	100	46	orthopyroxene
	JS-NGO-01s	NGO-HM1	63-125	6071	Amphibole	0.1751	medium_hit	92	13	amphibole
	JS-NGO-01s	NGO-HM1	63-125	6072	Magnetite	0.0263	good_hit	255	5	opaque
	JS-NGO-01s	NGO-HM1	63-125	6073	Edenite	0.108	good_hit	96	117	amphibole
	JS-NGO-01s	NGO-HM1	63-125	6074	Edenite	0.1197	good_hit	95	11	amphibole
	JS-NGO-01s	NGO-HM1	63-125	6075	Diopside	0.0551	good_hit	105	60	orthopyroxene
	JS-NGO-01s	NGO-HM1	63-125	6076	Diopside	0.0511	good_hit	108	42	clinopyroxene
	JS-NGO-01s	NGO-HM1	63-125	6077	Amphibole	0.133	good_hit	96	9	amphibole
	JS-NGO-01s	NGO-HM1	63-125	6078	Amphibole	0.0962	good_hit	98	58	amphibole
	JS-NGO-01s	NGO-HM1	63-125	6079	Amphibole	0.071	good_hit	96	16	amphibole
	JS-NGO-01s	NGO-HM1	63-125	6080	Enstatite	0.0912	good_hit	109	92	orthopyroxene
	JS-NGO-01s	NGO-HM1	63-125	6081	Diopside	0.0471	good_hit	96	44	orthopyroxene
	JS-NGO-01s	NGO-HM1	63-125	6082	Enstatite	0.0395	good_hit	104	34	orthopyroxene
	JS-NGO-01s	NGO-HM1	63-125	6083	Almandine	0.0454	good_hit	113	25	garnet
	JS-NGO-01s	NGO-HM1	63-125	6084	Ferrosilite	0.0275	good_hit	101	30	orthopyroxene
	JS-NGO-01s	NGO-HM1	63-125	6085	Albite	0.1546	medium_hit	74	24	feldspar
	JS-NGO-01s	NGO-HM1	63-125	6086	Edenite	0.0911	good_hit	93	20	amphibole
	JS-NGO-01s	NGO-HM1	63-125	6087	Hematite	0.3119	no_hit	255	5	opaque
	JS-NGO-01s	NGO-HM1	63-125	6088	Grunerite	0.1653	medium_hit	91	13	amphibole
	JS-NGO-01s	NGO-HM1	63-125	6089	Quartz	0.0301	good_hit	70	83	quartz
	JS-NGO-01s	NGO-HM1	63-125	6090	Diopside	0.0433	good_hit	101	37	clinopyroxene
	JS-NGO-01s	NGO-HM1	63-125	6091			noisy spectra	74	17	not_identified
	JS-NGO-01s	NGO-HM1	63-125	6092	Diopside	0.0539	good_hit	103	101	orthopyroxene
	JS-NGO-01s	NGO-HM1	63-125	6093	Ilmenite	0.1142	good_hit	250	5	opaque
	JS-NGO-01s	NGO-HM1	63-125	6094	Amphibole	0.1553	medium_hit	85	18	amphibole
	JS-NGO-01s	NGO-HM1	63-125	6095	Phenakite	0.3624	no_hit	89	20	not_identified
	JS-NGO-01s	NGO-HM1	63-125	6096	Ferrosilite	0.0256	good_hit	100	107	orthopyroxene
	JS-NGO-01s	NGO-HM1	63-125	6097	Forsterite	0.0364	good_hit	89	90	olivine
	JS-NGO-01s	NGO-HM1	63-125	6098	Pyrope	0.0434	good_hit	114	39	garnet
	JS-NGO-01s	NGO-HM1	63-125	6099	Diopside	0.0551	good_hit	101	23	clinopyroxene
	JS-NGO-01s	NGO-HM1	63-125	6100	Pyrope	0.059	good_hit	120	51	garnet
	JS-NGO-01s	NGO-HM1	63-125	6101	Amphibole	0.2825	medium_hit	101	12	amphibole
	JS-NGO-01s	NGO-HM1	63-125	6102	Diopside	0.0994	good_hit	109	11	clinopyroxene
	JS-NGO-01s	NGO-HM1	63-125	6103	Enstatite	0.1067	good_hit	97	29	orthopyroxene
	JS-NGO-01s	NGO-HM1	63-125	6104	Amphibole	0.1282	good_hit	96	18	amphibole
	JS-NGO-01s	NGO-HM1	63-125	6105	Diopside	0.0518	good_hit	99	103	clinopyroxene
	JS-NGO-01s	NGO-HM1	63-125	6106			noisy spectra	95	25	orthopyroxene
	JS-NGO-01s	NGO-HM1	63-125	6107	Magnetite	0.0125	good_hit	247	5	opaque
	JS-NGO-01s	NGO-HM1	63-125	6108	Enstatite	0.0454	good_hit	105	37	orthopyroxene
	JS-NGO-01s	NGO-HM1	63-125	6109	Calcioferrite	0.8588	ungrouped	78	15	not_identified
	JS-NGO-01s	NGO-HM1	63-125	6110	Amphibole	0.1069	good_hit	96	12	amphibole
	JS-NGO-01s	NGO-HM1	63-125	6111	Edenite	0.1002	good_hit	96	24	amphibole
	JS-NGO-01s	NGO-HM1	63-125	6112	Sillimanite	0.058	good_hit	98	125	sillimanite
	JS-NGO-01s	NGO-HM1	63-125	6113	Almandine	0.0431	good_hit	122	94	garnet
	JS-NGO-01s	NGO-HM1	63-125	6114	Fluorapatite	0.0527	good_hit	86	116	apatite
	JS-NGO-01s	NGO-HM1	63-125	6115	Enstatite	0.0931	good_hit	91	105	orthopyroxene
	JS-NGO-01s	NGO-HM1	63-125	6116	Amphibole	0.2235	medium_hit	96	44	amphibole
	JS-NGO-01s	NGO-HM1	63-125	6117	Warwickite	0.2827	ungrouped	96	28	amphibole
	JS-NGO-01s	NGO-HM1	63-125	6118	Amphibole	0.1477	good_hit	96	11	amphibole
	JS-NGO-01s	NGO-HM1	63-125	6119	Actinolite	0.0615	good_hit	90	41	amphibole
	JS-NGO-01s	NGO-HM1	63-125	6120	Pyrope	0.0514	good_hit	113	77	garnet
	JS-NGO-01s	NGO-HM1	63-125	6121	Amphibole	0.5365	no_hit	104	102	not_identified
	JS-NGO-01s	NGO-HM1	63-125	6122	Edenite	0.0798	good_hit	95	64	amphibole
	JS-NGO-01s	NGO-HM1	63-125	6123	Fluorapatite	0.0353	good_hit	85	113	apatite
	JS-NGO-01s	NGO-HM1	63-125	6124	Edenite	0.1087	good_hit	91	23	amphibole
	JS-NGO-01s	NGO-HM1	63-125	6125	Almandine	0.047	good_hit	113	28	garnet
	JS-NGO-01s	NGO-HM1	63-125	6126	Amphibole	0.0793	good_hit	93	12	amphibole
	JS-NGO-01s	NGO-HM1	63-125	6127	Amphibole	0.0327	good_hit	97	21	amphibole
	JS-NGO-01s	NGO-HM1	63-125	6128			noisy spectra	90	25	not_identified
	JS-NGO-01s	NGO-HM1	63-125	6129	Diopside	0.0439	good_hit	99	91	clinopyroxene
	JS-NGO-01s	NGO-HM1	63-125	6130			noisy spectra	92	9	phyllosilicate
	JS-NGO-01s	NGO-HM1	63-125	6131	Amphibole	0.0372	good_hit	94	22	amphibole
	JS-NGO-01s	NGO-HM1	63-125	6132	Anorthite	0.1127	good_hit	75	115	feldspar
	JS-NGO-01s	NGO-HM1	63-125	6133	Amphibole	0.1196	good_hit	92	23	amphibole
	JS-NGO-01s	NGO-HM1	63-125	6134	Ilmenite	0.1896	medium_hit	255	4	opaque
	JS-NGO-01s	NGO-HM1	63-125	6135	Pyrope	0.039	good_hit	120	107	garnet
	JS-NGO-01s	NGO-HM1	63-125	6136	Edenite	0.0675	good_hit	92	69	amphibole
	JS-NGO-01s	NGO-HM1	63-125	6137	Pyrope	0.0419	good_hit	122	150	garnet
	JS-NGO-01s	NGO-HM1	63-125	6138	Gaspeite	0.5253	no_hit	67	11	not_identified
	JS-NGO-01s	NGO-HM1	63-125	6139	Pyrope	0.0459	good_hit	117	85	garnet
	JS-NGO-01s	NGO-HM1	63-125	6140	Edenite	0.093	good_hit	96	31	amphibole
	JS-NGO-01s	NGO-HM1	63-125	6141	Edenite	0.1206	good_hit	89	22	amphibole
	JS-NGO-01s	NGO-HM1	63-125	6142	Pyrope	0.0338	good_hit	111	89	garnet
	JS-NGO-01s	NGO-HM1	63-125	6143	Ferrosilite	0.0447	good_hit	101	42	orthopyroxene
	JS-NGO-01s	NGO-HM1	63-125	6144	Enstatite	0.0267	good_hit	96	116	orthopyroxene
	JS-NGO-01s	NGO-HM1	63-125	6145	Enstatite	0.0766	good_hit	99	71	orthopyroxene
	JS-NGO-01s	NGO-HM1	63-125	6146	Edenite	0.1012	good_hit	86	32	amphibole
	JS-NGO-01s	NGO-HM1	63-125	6147	Amphibole	0.069	good_hit	87	73	amphibole
	JS-NGO-01s	NGO-HM1	63-125	6148	Actinolite	0.072	good_hit	92	62	amphibole
	JS-NGO-01s	NGO-HM1	63-125	6149	Amphibole	0.2089	medium_hit	85	17	amphibole
	JS-NGO-01s	NGO-HM1	63-125	6150	Enstatite	0.0476	good_hit	105	52	orthopyroxene
	JS-NGO-01s	NGO-HM1	63-125	6151	Edenite	0.208	medium_hit	82	8	amphibole
	JS-NGO-01s	NGO-HM1	63-125	6152	Winchite	0.2279	medium_hit	94	8	amphibole
	JS-NGO-01s	NGO-HM1	63-125	6153	Pyrope	0.0202	good_hit	126	106	garnet
	JS-NGO-01s	NGO-HM1	63-125	6154	Ferrosilite	0.0338	good_hit	101	21	orthopyroxene
	JS-NGO-01s	NGO-HM1	63-125	6155	Magnetite	0.0517	good_hit	255	4	opaque
	JS-NGO-01s	NGO-HM1	63-125	6156	Pyrope	0.0317	good_hit	116	88	garnet
	JS-NGO-01s	NGO-HM1	63-125	6157	Fluorapatite	0.0602	good_hit	90	71	apatite
	JS-NGO-01s	NGO-HM1	63-125	6158	Warwickite	0.2832	ungrouped	98	10	amphibole
	JS-NGO-01s	NGO-HM1	63-125	6159	Amphibole	0.0823	good_hit	95	43	amphibole
	JS-NGO-01s	NGO-HM1	63-125	6160	Pyrope	0.043	good_hit	123	117	garnet
	JS-NGO-01s	NGO-HM1	63-125	6161	Actinolite	0.1118	good_hit	89	17	amphibole
	JS-NGO-01s	NGO-HM1	63-125	6162	Edenite	0.1187	good_hit	90	41	amphibole
	JS-NGO-01s	NGO-HM1	63-125	6163	Ferrosilite	0.0652	good_hit	103	81	orthopyroxene
	JS-NGO-01s	NGO-HM1	63-125	6164	Pyrope	0.0519	good_hit	117	132	garnet
	JS-NGO-01s	NGO-HM1	63-125	6165	Enstatite	0.0501	good_hit	107	78	orthopyroxene
	JS-NGO-01s	NGO-HM1	63-125	6166	Enstatite	0.1123	good_hit	109	207	orthopyroxene
	JS-NGO-01s	NGO-HM1	63-125	6167	Ferrosilite	0.0385	good_hit	102	94	orthopyroxene
	JS-NGO-01s	NGO-HM1	63-125	6168	Pyrope	0.021	good_hit	115	124	garnet
	JS-NGO-01s	NGO-HM1	63-125	6169	Pyrope	0.0404	good_hit	116	77	garnet
	JS-NGO-01s	NGO-HM1	63-125	6170	Amphibole	0.2476	medium_hit	86	7	amphibole
	JS-NGO-01s	NGO-HM1	63-125	6171	Enstatite	0.04	good_hit	106	87	orthopyroxene
	JS-NGO-01s	NGO-HM1	63-125	6172	Amphibole	0.0891	good_hit	87	29	amphibole
	JS-NGO-01s	NGO-HM1	63-125	6173	Amphibole	0.0677	good_hit	93	9	amphibole
	JS-NGO-01s	NGO-HM1	63-125	6174	Amphibole	0.1321	good_hit	83	53	amphibole
	JS-NGO-01s	NGO-HM1	63-125	6175	Almandine	0.0498	good_hit	94	79	garnet
	JS-NGO-01s	NGO-HM1	63-125	6176	Enstatite	0.0355	good_hit	104	42	orthopyroxene
	JS-NGO-01s	NGO-HM1	63-125	6177	Amphibole	0.385	no_hit	84	9	amphibole
	JS-NGO-01s	NGO-HM1	63-125	6178	Pyrope	0.0335	good_hit	118	98	garnet
	JS-NGO-01s	NGO-HM1	63-125	6179	Edenite	0.094	good_hit	86	7	amphibole
	JS-NGO-01s	NGO-HM1	63-125	6180	Enstatite	0.0335	good_hit	99	13	orthopyroxene
	JS-NGO-01s	NGO-HM1	63-125	6181	Pyrope	0.0571	good_hit	109	51	garnet
	JS-NGO-01s	NGO-HM1	63-125	6182	Amphibole	0.2288	medium_hit	92	21	amphibole
	JS-NGO-01s	NGO-HM1	63-125	6183	Edenite	0.1348	good_hit	97	5	amphibole
	JS-NGO-01s	NGO-HM1	63-125	6184	Almandine	0.0655	good_hit	121	43	garnet
	JS-NGO-01s	NGO-HM1	63-125	6185	Amphibole	0.0869	good_hit	96	8	amphibole
	JS-NGO-01s	NGO-HM1	63-125	6186	Pyrope	0.049	good_hit	122	67	garnet
	JS-NGO-01s	NGO-HM1	63-125	6187	Almandine	0.0417	good_hit	114	109	garnet
	JS-NGO-01s	NGO-HM1	63-125	6188	Fluorapatite	0.1325	good_hit	88	111	apatite
	JS-NGO-01s	NGO-HM1	63-125	6189	Grunerite	0.2198	medium_hit	93	76	amphibole
	JS-NGO-01s	NGO-HM1	63-125	6190	Amphibole	0.0573	good_hit	94	22	amphibole
	JS-NGO-01s	NGO-HM1	63-125	6191	Almandine	0.1395	good_hit	75	19	garnet
	JS-NGO-01s	NGO-HM1	63-125	6192	Diopside	0.059	good_hit	98	19	clinopyroxene
	JS-NGO-01s	NGO-HM1	63-125	6193	Serandite	0.664	no_hit	61	39	not_identified
	JS-NGO-01s	NGO-HM1	63-125	6194	Edenite	0.0747	good_hit	83	56	amphibole
	JS-NGO-01s	NGO-HM1	63-125	6195	Edenite	0.0874	good_hit	89	7	amphibole
	JS-NGO-01s	NGO-HM1	63-125	6196	Amphibole	0.1884	medium_hit	92	35	amphibole
	JS-NGO-01s	NGO-HM1	63-125	6197	Diopside	0.0391	good_hit	99	22	clinopyroxene
	JS-NGO-01s	NGO-HM1	63-125	6198	Amphibole	0.0619	good_hit	86	52	amphibole
	JS-NGO-01s	NGO-HM1	63-125	6199	Augite	0.0554	good_hit	95	102	clinopyroxene
	JS-NGO-01s	NGO-HM1	63-125	6200	Ferrosilite	0.0382	good_hit	104	55	orthopyroxene
	JS-NGO-01s	NGO-HM1	63-125	6201	Amphibole	0.0752	good_hit	99	16	amphibole
	JS-NGO-01s	NGO-HM1	63-125	6202	Amphibole	0.2078	medium_hit	98	8	amphibole
	JS-NGO-01s	NGO-HM1	63-125	6203	Amphibole	0.1035	good_hit	95	12	amphibole
	JS-NGO-01s	NGO-HM1	63-125	6204	Enstatite	0.0463	good_hit	95	118	orthopyroxene
	JS-NGO-01s	NGO-HM1	63-125	6205	Enstatite	0.082	good_hit	99	12	orthopyroxene
	JS-NGO-01s	NGO-HM1	63-125	6206	Ferrosilite	0.0331	good_hit	99	99	orthopyroxene
	JS-NGO-01s	NGO-HM1	63-125	6207	Enstatite	0.1471	good_hit	97	120	orthopyroxene
	JS-NGO-01s	NGO-HM1	63-125	6208	Enstatite	0.0642	good_hit	106	112	orthopyroxene
	JS-NGO-01s	NGO-HM1	63-125	6209	Ferrosilite	0.0515	good_hit	97	118	orthopyroxene
	JS-NGO-01s	NGO-HM1	63-125	6210	Amphibole	0.1109	good_hit	91	13	amphibole
	JS-NGO-01s	NGO-HM1	63-125	6211			noisy spectra	97	20	amphibole
	JS-NGO-01s	NGO-HM1	63-125	6212	Amphibole	0.1115	good_hit	91	51	amphibole
	JS-NGO-01s	NGO-HM1	63-125	6213	Ferrosilite	0.0464	good_hit	105	93	orthopyroxene
	JS-NGO-01s	NGO-HM1	63-125	6214	Edenite	0.0931	good_hit	95	24	amphibole
	JS-NGO-01s	NGO-HM1	63-125	6215	Fluorapatite	0.1218	good_hit	92	139	apatite
	JS-NGO-01s	NGO-HM1	63-125	6216	Amphibole	0.2618	medium_hit	97	8	amphibole
	JS-NGO-01s	NGO-HM1	63-125	6217	Amphibole	0.2509	medium_hit	95	17	amphibole
	JS-NGO-01s	NGO-HM1	63-125	6218	Amphibole	0.1539	medium_hit	94	5	amphibole
	JS-NGO-01s	NGO-HM1	63-125	6219	Amphibole	0.0728	good_hit	90	10	amphibole
	JS-NGO-01s	NGO-HM1	63-125	6220	Enstatite	0.0438	good_hit	107	91	orthopyroxene
	JS-NGO-01s	NGO-HM1	63-125	6221	Pyrope	0.026	good_hit	104	74	garnet
	JS-NGO-01s	NGO-HM1	63-125	6222	Pyrope	0.0933	good_hit	113	113	garnet
	JS-NGO-01s	NGO-HM1	63-125	6223	Amphibole	0.0974	good_hit	95	21	amphibole
	JS-NGO-01s	NGO-HM1	63-125	6224	Diopside	0.0732	good_hit	97	19	clinopyroxene
	JS-NGO-01s	NGO-HM1	63-125	6225	Ferrosilite	0.049	good_hit	105	31	orthopyroxene
	JS-NGO-01s	NGO-HM1	63-125	6226	Ferrosilite	0.0514	good_hit	100	44	orthopyroxene
	JS-NGO-01s	NGO-HM1	63-125	6227	Amphibole	0.0774	good_hit	84	26	amphibole
	JS-NGO-01s	NGO-HM1	63-125	6228	Almandine	0.0455	good_hit	110	76	garnet
	JS-NGO-01s	NGO-HM1	63-125	6229	Diopside	0.0855	good_hit	87	14	clinopyroxene
	JS-NGO-01s	NGO-HM1	63-125	6230	Diopside	0.145	good_hit	93	83	clinopyroxene
	JS-NGO-01s	NGO-HM1	63-125	6231	Pyrope	0.0264	good_hit	118	208	garnet
	JS-NGO-01s	NGO-HM1	63-125	6232	Enstatite	0.0327	good_hit	103	38	orthopyroxene
	JS-NGO-01s	NGO-HM1	63-125	6233	Amphibole	0.2202	medium_hit	97	9	amphibole
	JS-NGO-01s	NGO-HM1	63-125	6234	Almandine	0.2643	medium_hit	111	55	garnet
	JS-NGO-01s	NGO-HM1	63-125	6235	Diopside	0.0525	good_hit	102	21	clinopyroxene
	JS-NGO-01s	NGO-HM1	63-125	6236	Chamosite	0.1555	medium_hit	86	15	phyllosilicate
	JS-NGO-01s	NGO-HM1	63-125	6237	Enstatite	0.0405	good_hit	99	25	orthopyroxene
	JS-NGO-01s	NGO-HM1	63-125	6238	Amphibole	0.2035	medium_hit	96	18	amphibole
	JS-NGO-01s	NGO-HM1	63-125	6239	Diopside	0.0417	good_hit	106	60	orthopyroxene
	JS-NGO-01s	NGO-HM1	63-125	6240	Pyrope	0.0417	good_hit	118	8	garnet
	JS-NGO-01s	NGO-HM1	63-125	6241	Enstatite	0.1371	good_hit	103	47	orthopyroxene
	JS-NGO-01s	NGO-HM1	63-125	6242	Fluorapatite	0.1917	medium_hit	91	106	apatite
	JS-NGO-01s	NGO-HM1	63-125	6243	Amphibole	0.2474	medium_hit	98	4	amphibole
	JS-NGO-01s	NGO-HM1	63-125	6244	Enstatite	0.0416	good_hit	99	76	orthopyroxene
	JS-NGO-01s	NGO-HM1	63-125	6245	Amphibole	0.0466	good_hit	86	29	amphibole
	JS-NGO-01s	NGO-HM1	63-125	6246	Diopside	0.1004	good_hit	87	27	clinopyroxene
	JS-NGO-01s	NGO-HM1	63-125	6247	Fluorapatite	0.0762	good_hit	82	72	apatite
	JS-NGO-01s	NGO-HM1	63-125	6248	Titanite	0.3153	no_hit	205	6	titanite
	JS-NGO-01s	NGO-HM1	63-125	6249	Amphibole	0.3119	no_hit	91	5	amphibole
	JS-NGO-01s	NGO-HM1	63-125	6250	Albite	0.1173	good_hit	74	86	feldspar
	JS-NGO-01s	NGO-HM1	63-125	6251	Ferrosilite	0.1399	good_hit	104	104	orthopyroxene
	JS-NGO-01s	NGO-HM1	63-125	6252	Amphibole	0.059	good_hit	96	19	amphibole
	JS-NGO-01s	NGO-HM1	63-125	6253	Amphibole	0.289	medium_hit	99	11	amphibole
	JS-NGO-01s	NGO-HM1	63-125	6254	Amphibole	0.2121	medium_hit	95	15	amphibole
	JS-NGO-01s	NGO-HM1	63-125	6255	Annite	0.2832	medium_hit	98	5	amphibole
	JS-NGO-01s	NGO-HM1	63-125	6256	Amphibole	0.0822	good_hit	85	18	amphibole
	JS-NGO-01s	NGO-HM1	63-125	6257	Ferrosilite	0.0259	good_hit	92	55	orthopyroxene
	JS-NGO-01s	NGO-HM1	63-125	6258	Edenite	0.0789	good_hit	93	21	amphibole
	JS-NGO-01s	NGO-HM1	63-125	6259	Pyrope	0.0443	good_hit	115	130	garnet
	JS-NGO-01s	NGO-HM1	63-125	6260	Edenite	0.0758	good_hit	89	10	amphibole
	JS-NGO-01s	NGO-HM1	63-125	6261	Edenite	0.1294	good_hit	96	4	amphibole
	JS-NGO-01s	NGO-HM1	63-125	6262	Annite	0.3008	no_hit	95	6	amphibole
	JS-NGO-01s	NGO-HM1	63-125	6263	Spessartine	0.0491	good_hit	119	154	garnet
	JS-NGO-01s	NGO-HM1	63-125	6264	Actinolite	0.072	good_hit	84	118	amphibole
	JS-NGO-01s	NGO-HM1	63-125	6265	Enstatite	0.0411	good_hit	105	76	orthopyroxene
	JS-NGO-01s	NGO-HM1	63-125	6266	Pyrope	0.0528	good_hit	117	24	garnet
	JS-NGO-01s	NGO-HM1	63-125	6267	Enstatite	0.0828	good_hit	88	43	orthopyroxene
	JS-NGO-01s	NGO-HM1	63-125	6268	Enstatite	0.0475	good_hit	93	72	orthopyroxene
	JS-NGO-01s	NGO-HM1	63-125	6269	Pyrope	0.0474	good_hit	115	87	garnet
	JS-NGO-01s	NGO-HM1	63-125	6270	Amphibole	0.3192	no_hit	92	11	amphibole
	JS-NGO-01s	NGO-HM1	63-125	6271	Fluorapatite	0.054	good_hit	94	84	apatite
	JS-NGO-01s	NGO-HM1	63-125	6272	Diopside	0.0902	good_hit	100	126	clinopyroxene
	JS-NGO-01s	NGO-HM1	63-125	6273	Pyrope	0.0512	good_hit	121	143	garnet
	JS-NGO-01s	NGO-HM1	63-125	6274	Edenite	0.0859	good_hit	93	14	amphibole
	JS-NGO-01s	NGO-HM1	63-125	6275	Edenite	0.0769	good_hit	88	5	amphibole
	JS-NGO-01s	NGO-HM1	63-125	6276	Almandine	0.0413	good_hit	118	139	garnet
	JS-NGO-01s	NGO-HM1	63-125	6277	Albite	0.0895	good_hit	75	19	feldspar
	JS-NGO-01s	NGO-HM1	63-125	6278	Fluorapatite	0.158	medium_hit	89	48	apatite
	JS-NGO-01s	NGO-HM1	63-125	6279	Amphibole	0.1284	good_hit	94	9	amphibole
	JS-NGO-01s	NGO-HM1	63-125	6280	Edenite	0.0856	good_hit	91	6	amphibole
	JS-NGO-01s	NGO-HM1	63-125	6281	Amphibole	0.1758	medium_hit	95	11	amphibole
	JS-NGO-01s	NGO-HM1	63-125	6282	Pyrope	0.0486	good_hit	102	90	garnet
	JS-NGO-01s	NGO-HM1	63-125	6283	Edenite	0.1316	good_hit	94	14	amphibole
	JS-NGO-01s	NGO-HM1	63-125	6284	Ferrosilite	0.0245	good_hit	99	22	orthopyroxene
	JS-NGO-01s	NGO-HM1	63-125	6285	Pyrope	0.0337	good_hit	116	57	garnet
	JS-NGO-01s	NGO-HM1	63-125	6286	Olshanskyite	0.8105	ungrouped	80	44	not_identified
	JS-NGO-01s	NGO-HM1	63-125	6287	Edenite	0.0778	good_hit	89	49	amphibole
	JS-NGO-01s	NGO-HM1	63-125	6288	Quartz	0.0211	good_hit	73	22	quartz
	JS-NGO-01s	NGO-HM1	63-125	6289	Enstatite	0.0493	good_hit	107	11	orthopyroxene
	JS-NGO-01s	NGO-HM1	63-125	6290	Forsterite	0.0332	good_hit	102	111	olivine
	JS-NGO-01s	NGO-HM1	63-125	6291	Almandine	0.0395	good_hit	122	47	garnet
	JS-NGO-01s	NGO-HM1	63-125	6292	Amphibole	0.2511	medium_hit	97	5	amphibole
	JS-NGO-01s	NGO-HM1	63-125	6293	Enstatite	0.05	good_hit	108	76	orthopyroxene
	JS-NGO-01s	NGO-HM1	63-125	6294	Gyrolite	0.8106	no_hit	43	15	not_identified
	JS-NGO-01s	NGO-HM1	63-125	6295	Pargasite	0.1623	medium_hit	90	100	amphibole
	JS-NGO-01s	NGO-HM1	63-125	6296	Enstatite	0.0541	good_hit	102	67	orthopyroxene
	JS-NGO-01s	NGO-HM1	63-125	6297			noisy spectra	98	66	not_identified
	JS-NGO-01s	NGO-HM1	63-125	6298	Enstatite	0.0479	good_hit	80	55	orthopyroxene
	JS-NGO-01s	NGO-HM1	63-125	6299	Chamosite	0.3404	no_hit	71	79	not_identified
	JS-NGO-01s	NGO-HM1	63-125	6300	Ferrosilite	0.0477	good_hit	107	150	orthopyroxene
	JS-NGO-01s	NGO-HM1	63-125	6301	Augite	0.0463	good_hit	93	46	clinopyroxene
	JS-NGO-01s	NGO-HM1	63-125	6302			noisy spectra	255	7	opaque
	JS-NGO-01s	NGO-HM1	63-125	6303	Epidote	0.2805	medium_hit	112	140	epidote
	JS-NGO-01s	NGO-HM1	63-125	6304	Senarmontite	0.7523	ungrouped	91	91	not_identified
	JS-NGO-01s	NGO-HM1	63-125	6305	Zircon	0.0902	good_hit	152	16	zircon
	JS-NGO-01s	NGO-HM1	63-125	6306	Edenite	0.0453	good_hit	92	20	amphibole
	JS-NGO-01s	NGO-HM1	63-125	6307	Amphibole	0.083	good_hit	97	41	amphibole
	JS-NGO-01s	NGO-HM1	63-125	6308	Amphibole	0.1737	medium_hit	95	5	amphibole
	JS-NGO-01s	NGO-HM1	63-125	6309	Edenite	0.1438	good_hit	96	9	amphibole
	JS-NGO-01s	NGO-HM1	63-125	6310	Pyrope	0.0236	good_hit	116	28	garnet
	JS-NGO-01s	NGO-HM1	63-125	6311			noisy spectra	101	69	not_identified
	JS-NGO-01s	NGO-HM1	63-125	6312	Amphibole	0.246	medium_hit	91	10	amphibole
	JS-NGO-01s	NGO-HM1	63-125	6313	Amphibole	0.1442	good_hit	98	48	amphibole
	JS-NGO-01s	NGO-HM1	63-125	6314			noisy spectra	90	10	amphibole
	JS-NGO-01s	NGO-HM1	63-125	6315	Magnetite	0.1123	good_hit	255	5	opaque
	JS-NGO-01s	NGO-HM1	63-125	6316	Diopside	0.0992	good_hit	110	39	orthopyroxene
	JS-NGO-01s	NGO-HM1	63-125	6317	Ferrosilite	0.0462	good_hit	111	45	orthopyroxene
	JS-NGO-01s	NGO-HM1	63-125	6318	Amphibole	0.2781	medium_hit	83	5	amphibole
	JS-NGO-01s	NGO-HM1	63-125	6319	Ferrosilite	0.036	good_hit	107	104	orthopyroxene
	JS-NGO-01s	NGO-HM1	63-125	6320	Enstatite	0.0457	good_hit	93	163	orthopyroxene
	JS-NGO-01s	NGO-HM1	63-125	6321			noisy spectra	105	8	opaque
	JS-NGO-01s	NGO-HM1	63-125	6322	Diopside	0.0623	good_hit	97	130	clinopyroxene
	JS-NGO-01s	NGO-HM1	63-125	6323	Sillimanite	0.0213	good_hit	88	168	sillimanite
	JS-NGO-01s	NGO-HM1	63-125	6324	Augite	0.0561	good_hit	91	52	clinopyroxene
	JS-NGO-01s	NGO-HM1	63-125	6325	Fluorapatite	0.0745	good_hit	79	66	apatite
	JS-NGO-01s	NGO-HM1	63-125	6326	Enstatite	0.052	good_hit	99	102	orthopyroxene
	JS-NGO-01s	NGO-HM1	63-125	6327	Enstatite	0.0815	good_hit	110	54	orthopyroxene
	JS-NGO-01s	NGO-HM1	63-125	6328	Fluorapatite	0.0404	good_hit	92	122	apatite
	JS-NGO-01s	NGO-HM1	63-125	6329	Sillimanite	0.103	good_hit	98	124	sillimanite
	JS-NGO-01s	NGO-HM1	63-125	6330	Edenite	0.1264	good_hit	92	13	amphibole
	JS-NGO-01s	NGO-HM1	63-125	6331	Ferrosilite	0.051	good_hit	107	16	orthopyroxene
	JS-NGO-01s	NGO-HM1	63-125	6332	Edenite	0.1264	good_hit	97	21	amphibole
	JS-NGO-01s	NGO-HM1	63-125	6333	Edenite	0.1352	good_hit	100	5	amphibole
	JS-NGO-01s	NGO-HM1	63-125	6334	Enstatite	0.0554	good_hit	107	81	orthopyroxene
	JS-NGO-01s	NGO-HM1	63-125	6335	Pyrope	0.1606	medium_hit	119	25	garnet
	JS-NGO-01s	NGO-HM1	63-125	6336	Forsterite	0.0308	good_hit	93	166	olivine
	JS-NGO-01s	NGO-HM1	63-125	6337	Enstatite	0.0698	good_hit	104	42	orthopyroxene
	JS-NGO-01s	NGO-HM1	63-125	6338	Amphibole	0.1052	good_hit	101	17	amphibole
	JS-NGO-01s	NGO-HM1	63-125	6339	Fluorapatite	0.0998	good_hit	93	52	apatite
	JS-NGO-01s	NGO-HM1	63-125	6340	Pyrope	0.0549	good_hit	119	38	garnet
	JS-NGO-01s	NGO-HM1	63-125	6341	Enstatite	0.066	good_hit	102	24	orthopyroxene
	JS-NGO-01s	NGO-HM1	63-125	6342	Almandine	0.0412	good_hit	116	94	garnet
	JS-NGO-01s	NGO-HM1	63-125	6343	Amphibole	0.2349	medium_hit	94	9	amphibole
	JS-NGO-01s	NGO-HM1	63-125	6344	Amphibole	0.0586	good_hit	98	27	amphibole
	JS-NGO-01s	NGO-HM1	63-125	6345	Edenite	0.1268	good_hit	99	7	amphibole
	JS-NGO-01s	NGO-HM1	63-125	6346	Semseyite	0.3704	ungrouped	255	6	opaque
	JS-NGO-01s	NGO-HM1	63-125	6347	Pyrope	0.0382	good_hit	112	93	garnet
	JS-NGO-01s	NGO-HM1	63-125	6348	Pyrope	0.0416	good_hit	121	116	garnet
	JS-NGO-01s	NGO-HM1	63-125	6349	Amphibole	0.2825	medium_hit	96	10	amphibole
	JS-NGO-01s	NGO-HM1	63-125	6350	Diopside	0.0342	good_hit	106	80	clinopyroxene
	JS-NGO-01s	NGO-HM1	63-125	6351	Almandine	0.0563	good_hit	120	114	garnet
	JS-NGO-01s	NGO-HM1	63-125	6352	Pyrope	0.0395	good_hit	118	57	garnet
	JS-NGO-01s	NGO-HM1	63-125	6353	Almandine	0.0354	good_hit	118	28	garnet
	JS-NGO-01s	NGO-HM1	63-125	6354	Pyrope	0.0297	good_hit	118	82	garnet
	JS-NGO-01s	NGO-HM1	63-125	6355	Hematite	0.1823	medium_hit	234	5	opaque
	JS-NGO-01s	NGO-HM1	63-125	6356	Edenite	0.0611	good_hit	78	36	amphibole
	JS-NGO-01s	NGO-HM1	63-125	6357	Diopside	0.0672	good_hit	95	45	clinopyroxene
	JS-NGO-01s	NGO-HM1	63-125	6358	Almandine	0.0432	good_hit	107	55	garnet
	JS-NGO-01s	NGO-HM1	63-125	6359	Amphibole	0.1735	medium_hit	89	32	amphibole
	JS-NGO-01s	NGO-HM1	63-125	6360	Pyrope	0.0403	good_hit	124	58	garnet
	JS-NGO-01s	NGO-HM1	63-125	6361	Sillimanite	0.0544	good_hit	92	109	sillimanite
	JS-NGO-01s	NGO-HM1	63-125	6362	Spessartine	0.0601	good_hit	119	72	garnet
	JS-NGO-01s	NGO-HM1	63-125	6363	Edenite	0.076	good_hit	96	48	amphibole
	JS-NGO-01s	NGO-HM1	63-125	6364	Ferrosilite	0.0404	good_hit	106	9	orthopyroxene
	JS-NGO-01s	NGO-HM1	63-125	6365	Pyrope	0.0418	good_hit	122	143	garnet
	JS-NGO-01s	NGO-HM1	63-125	6366	Pyrope	0.0324	good_hit	123	102	garnet
	JS-NGO-01s	NGO-HM1	63-125	6367	Ilmenite	0.2621	medium_hit	255	5	opaque
	JS-NGO-01s	NGO-HM1	63-125	6368	MonaziteCe	0.0545	good_hit	122	18	monazite
	JS-NGO-01s	NGO-HM1	63-125	6369	Pyrope	0.0268	good_hit	114	119	garnet
	JS-NGO-01s	NGO-HM1	63-125	6370	Amphibole	0.1474	good_hit	85	15	amphibole
	JS-NGO-01s	NGO-HM1	63-125	6371	Edenite	0.1152	good_hit	95	19	amphibole
	JS-NGO-01s	NGO-HM1	63-125	6372	Amphibole	0.1435	good_hit	97	8	amphibole
	JS-NGO-01s	NGO-HM1	63-125	6373	Edenite	0.3013	no_hit	95	74	amphibole
	JS-NGO-01s	NGO-HM1	63-125	6374	Pyrope	0.0315	good_hit	120	129	garnet
	JS-NGO-01s	NGO-HM1	63-125	6375	Pyrope	0.0468	good_hit	108	100	garnet
	JS-NGO-01s	NGO-HM1	63-125	6376	Pyrope	0.0328	good_hit	109	83	garnet
	JS-NGO-01s	NGO-HM1	63-125	6377	Quartz	0.0245	good_hit	71	96	quartz
	JS-NGO-01s	NGO-HM1	63-125	6378	Ferrosilite	0.0417	good_hit	99	67	orthopyroxene
	JS-NGO-01s	NGO-HM1	63-125	6379	Amphibole	0.109	good_hit	94	9	amphibole
	JS-NGO-01s	NGO-HM1	63-125	6380	Albite	0.0885	good_hit	71	63	feldspar
	JS-NGO-01s	NGO-HM1	63-125	6381	Pyrope	0.0381	good_hit	121	93	garnet
	JS-NGO-01s	NGO-HM1	63-125	6382	Ferrosilite	0.04	good_hit	101	31	orthopyroxene
	JS-NGO-01s	NGO-HM1	63-125	6383	Amphibole	0.3943	no_hit	97	11	amphibole
	JS-NGO-01s	NGO-HM1	63-125	6384	Ferrosilite	0.0486	good_hit	105	46	orthopyroxene
	JS-NGO-01s	NGO-HM1	63-125	6385	Potassicfluoropargasite	0.7595	ungrouped	255	5	opaque
	JS-NGO-01s	NGO-HM1	63-125	6386	Amphibole	0.067	good_hit	91	32	amphibole
	JS-NGO-01s	NGO-HM1	63-125	6387	Albite	0.0744	good_hit	68	119	feldspar
	JS-NGO-01s	NGO-HM1	63-125	6388	Spessartine	0.0497	good_hit	121	72	garnet
	JS-NGO-01s	NGO-HM1	63-125	6389	Almandine	0.0391	good_hit	102	106	garnet
	JS-NGO-01s	NGO-HM1	63-125	6390	Enstatite	0.0782	good_hit	100	39	orthopyroxene
	JS-NGO-01s	NGO-HM1	63-125	6391	Amphibole	0.1509	medium_hit	84	14	amphibole
	JS-NGO-01s	NGO-HM1	63-125	6392	Diopside	0.0698	good_hit	85	9	clinopyroxene
	JS-NGO-01s	NGO-HM1	63-125	6393	Magnetite	0.0393	good_hit	255	5	opaque
	JS-NGO-01s	NGO-HM1	63-125	6394	Edenite	0.1776	medium_hit	93	28	amphibole
	JS-NGO-01s	NGO-HM1	63-125	6395	Almandine	0.0708	good_hit	117	175	garnet
	JS-NGO-01s	NGO-HM1	63-125	6396	Albite	0.0959	good_hit	72	30	feldspar
	JS-NGO-01s	NGO-HM1	63-125	6397	Amphibole	0.0807	good_hit	93	32	amphibole
	JS-NGO-01s	NGO-HM1	63-125	6398	Ferrosilite	0.0322	good_hit	104	88	orthopyroxene
	JS-NGO-01s	NGO-HM1	63-125	6399	Enstatite	0.1048	good_hit	101	96	orthopyroxene
	JS-NGO-01s	NGO-HM1	63-125	6400	Amphibole	0.1377	good_hit	93	44	amphibole
	JS-NGO-01s	NGO-HM1	63-125	6401	Diopside	0.0757	good_hit	103	15	clinopyroxene
	JS-NGO-01s	NGO-HM1	63-125	6402	Edenite	0.1151	good_hit	95	13	amphibole
	JS-NGO-01s	NGO-HM1	63-125	6403	Pyrope	0.0421	good_hit	118	176	garnet
	JS-NGO-01s	NGO-HM1	63-125	6404	Diopside	0.0409	good_hit	97	77	clinopyroxene
	JS-NGO-01s	NGO-HM1	63-125	6405	Amphibole	0.311	no_hit	93	7	amphibole
	JS-NGO-01s	NGO-HM1	63-125	6406	Nadorite	0.2684	ungrouped	218	5	opaque
	JS-NGO-01s	NGO-HM1	63-125	6407	Magnetite	0.2546	medium_hit	250	5	opaque
	JS-NGO-01s	NGO-HM1	63-125	6408	Amphibole	0.1662	medium_hit	98	6	amphibole
	JS-NGO-01s	NGO-HM1	63-125	6409	Pyrope	0.0539	good_hit	108	109	garnet
	JS-NGO-01s	NGO-HM1	63-125	6410	Augite	0.0389	good_hit	106	58	clinopyroxene
	JS-NGO-01s	NGO-HM1	63-125	6411	Amphibole	0.1108	good_hit	92	15	amphibole
	JS-NGO-01s	NGO-HM1	63-125	6412	Amphibole	0.154	medium_hit	93	13	amphibole
	JS-NGO-01s	NGO-HM1	63-125	6413			noisy spectra	88	4	opaque
	JS-NGO-01s	NGO-HM1	63-125	6414	Enstatite	0.0632	good_hit	102	17	orthopyroxene
	JS-NGO-01s	NGO-HM1	63-125	6415	Quartz	0.0333	good_hit	72	122	quartz
	JS-NGO-01s	NGO-HM1	63-125	6416	Ferrosilite	0.0718	good_hit	110	60	orthopyroxene
	JS-NGO-01s	NGO-HM1	63-125	6417	Amphibole	0.182	medium_hit	98	47	amphibole
	JS-NGO-01s	NGO-HM1	63-125	6418	Amphibole	0.2528	medium_hit	96	13	amphibole
	JS-NGO-01s	NGO-HM1	63-125	6419	Annite	0.2324	medium_hit	101	5	amphibole
	JS-NGO-01s	NGO-HM1	63-125	6420			noisy spectra	99	69	not_identified
	JS-NGO-01s	NGO-HM1	63-125	6421	Pyrope	0.0335	good_hit	121	63	garnet
	JS-NGO-01s	NGO-HM1	63-125	6422	Edenite	0.082	good_hit	100	6	amphibole
	JS-NGO-01s	NGO-HM1	63-125	6423			noisy spectra	90	43	amphibole
	JS-NGO-01s	NGO-HM1	63-125	6424	Ferrosilite	0.1896	medium_hit	94	85	orthopyroxene
	JS-NGO-01s	NGO-HM1	63-125	6425	Pyrope	0.0276	good_hit	117	46	garnet
	JS-NGO-01s	NGO-HM1	63-125	6426	Pyrope	0.0746	good_hit	114	113	garnet
	JS-NGO-01s	NGO-HM1	63-125	6427	Diopside	0.1063	good_hit	88	45	clinopyroxene
	JS-NGO-01s	NGO-HM1	63-125	6428	Sillimanite	0.0293	good_hit	91	91	sillimanite
	JS-NGO-01s	NGO-HM1	63-125	6429	Pyrope	0.0322	good_hit	102	103	garnet
	JS-NGO-01s	NGO-HM1	63-125	6430	Amphibole	0.276	medium_hit	98	14	amphibole
	JS-NGO-01s	NGO-HM1	63-125	6431	Ferrosilite	0.0607	good_hit	105	20	orthopyroxene
	JS-NGO-01s	NGO-HM1	63-125	6432	Epidote	0.112	good_hit	124	77	epidote
	JS-NGO-01s	NGO-HM1	63-125	6433	Amphibole	0.269	medium_hit	100	8	amphibole
	JS-NGO-01s	NGO-HM1	63-125	6434	Amphibole	0.0973	good_hit	98	10	amphibole
	JS-NGO-01s	NGO-HM1	63-125	6435	Diopside	0.0429	good_hit	99	29	clinopyroxene
	JS-NGO-01s	NGO-HM1	63-125	6436	Diopside	0.0614	good_hit	106	57	clinopyroxene
	JS-NGO-01s	NGO-HM1	63-125	6437	Pyrope	0.0322	good_hit	124	165	garnet
	JS-NGO-01s	NGO-HM1	63-125	6438	Amphibole	0.2469	medium_hit	94	21	amphibole
	JS-NGO-01s	NGO-HM1	63-125	6439	Augite	0.0823	good_hit	101	90	clinopyroxene
	JS-NGO-01s	NGO-HM1	63-125	6440	Amphibole	0.2097	medium_hit	96	6	amphibole
	JS-NGO-01s	NGO-HM1	63-125	6441	Edenite	0.1391	good_hit	89	60	amphibole
	JS-NGO-01s	NGO-HM1	63-125	6442	Amphibole	0.1366	good_hit	94	12	amphibole
	JS-NGO-01s	NGO-HM1	63-125	6443	Enstatite	0.062	good_hit	103	73	orthopyroxene
	JS-NGO-01s	NGO-HM1	63-125	6444	Amphibole	0.238	medium_hit	92	8	amphibole
	JS-NGO-01s	NGO-HM1	63-125	6445	Edenite	0.1431	good_hit	90	28	amphibole
	JS-NGO-01s	NGO-HM1	63-125	6446	Almandine	0.0266	good_hit	113	89	garnet
	JS-NGO-01s	NGO-HM1	63-125	6447	Amphibole	0.1352	good_hit	86	11	amphibole
	JS-NGO-01s	NGO-HM1	63-125	6448	Enstatite	0.0448	good_hit	101	23	orthopyroxene
	JS-NGO-01s	NGO-HM1	63-125	6449	Annite	0.3018	no_hit	94	7	amphibole
	JS-NGO-01s	NGO-HM1	63-125	6450	Pyrope	0.0374	good_hit	114	37	garnet
	JS-NGO-01s	NGO-HM1	63-125	6451	Almandine	0.0663	good_hit	115	42	garnet
	JS-NGO-01s	NGO-HM1	63-125	6452	Amphibole	0.1724	medium_hit	95	15	amphibole
	JS-NGO-01s	NGO-HM1	63-125	6453	Diopside	0.075	good_hit	97	158	clinopyroxene
	JS-NGO-01s	NGO-HM1	63-125	6454	Annite	0.3572	no_hit	99	5	amphibole
	JS-NGO-01s	NGO-HM1	63-125	6455	Almandine	0.0406	good_hit	122	71	garnet
	JS-NGO-01s	NGO-HM1	63-125	6456	Enstatite	0.1672	medium_hit	105	15	orthopyroxene
	JS-NGO-01s	NGO-HM1	63-125	6457	Enstatite	0.0424	good_hit	104	69	orthopyroxene
	JS-NGO-01s	NGO-HM1	63-125	6458	Edenite	0.0886	good_hit	94	23	amphibole
	JS-NGO-01s	NGO-HM1	63-125	6459	Diopside	0.0475	good_hit	104	59	clinopyroxene
	JS-NGO-01s	NGO-HM1	63-125	6460	Grunerite	0.1142	good_hit	92	42	amphibole
	JS-NGO-01s	NGO-HM1	63-125	6461	Amphibole	0.1459	good_hit	94	9	amphibole
	JS-NGO-01s	NGO-HM1	63-125	6462	Amphibole	0.1099	good_hit	87	5	amphibole
	JS-NGO-01s	NGO-HM1	63-125	6463	Edenite	0.1725	medium_hit	79	31	amphibole
	JS-NGO-01s	NGO-HM1	63-125	6464	Almandine	0.0548	good_hit	109	95	garnet
	JS-NGO-01s	NGO-HM1	63-125	6465	Ferrosilite	0.0806	good_hit	103	89	orthopyroxene
	JS-NGO-01s	NGO-HM1	63-125	6466	Diopside	0.06	good_hit	102	94	clinopyroxene
	JS-NGO-01s	NGO-HM1	63-125	6467	Augite	0.1177	good_hit	103	4	clinopyroxene
	JS-NGO-01s	NGO-HM1	63-125	6468	Amphibole	0.0814	good_hit	97	8	amphibole
	JS-NGO-01s	NGO-HM1	63-125	6469	Edenite	0.0728	good_hit	96	4	amphibole
	JS-NGO-01s	NGO-HM1	63-125	6470	Ferrosilite	0.0562	good_hit	107	110	orthopyroxene
	JS-NGO-01s	NGO-HM1	63-125	6471	Almandine	0.1233	good_hit	123	83	garnet
	JS-NGO-01s	NGO-HM1	63-125	6472	Amphibole	0.1244	good_hit	94	92	amphibole
	JS-NGO-01s	NGO-HM1	63-125	6473			noisy spectra	94	10	not_identified
	JS-NGO-01s	NGO-HM1	63-125	6474	Amphibole	0.13	good_hit	104	8	amphibole
	JS-NGO-01s	NGO-HM1	63-125	6475	Diopside	0.0673	good_hit	108	72	clinopyroxene
	JS-NGO-01s	NGO-HM1	63-125	6476	Chamosite	0.1145	good_hit	82	15	phyllosilicate
	JS-NGO-01s	NGO-HM1	63-125	6477			noisy spectra	91	47	phyllosilicate
	JS-NGO-01s	NGO-HM1	63-125	6478	Amphibole	0.2648	medium_hit	92	7	amphibole
	JS-NGO-01s	NGO-HM1	63-125	6479	Annite	0.2692	medium_hit	87	5	amphibole
	JS-NGO-01s	NGO-HM1	63-125	6480	Diopside	0.0521	good_hit	93	86	clinopyroxene
	JS-NGO-01s	NGO-HM1	63-125	6481	Enstatite	0.0479	good_hit	101	75	orthopyroxene
	JS-NGO-01s	NGO-HM1	63-125	6482	Zircon	0.3524	no_hit	136	81	zircon
	JS-NGO-01s	NGO-HM1	63-125	6483	Actinolite	0.1141	good_hit	94	42	amphibole
	JS-NGO-01s	NGO-HM1	63-125	6484	Augite	0.0246	good_hit	107	137	clinopyroxene
	JS-NGO-01s	NGO-HM1	63-125	6485	Ilmenite	0.1991	medium_hit	246	5	opaque
	JS-NGO-01s	NGO-HM1	63-125	6486	Edenite	0.1441	good_hit	92	55	amphibole
	JS-NGO-01s	NGO-HM1	63-125	6487	Enstatite	0.0568	good_hit	105	125	orthopyroxene
[truncated: 64,303 more rows]

## Sheet: Table S2
	Detrital garnet petrology challenges Paleoproterozoic ultrahigh-pressure metamorphism in western Greenland Jan Schönig1, Carsten Benner1, Guido Meinhold2, Hilmar von Eynatten1, N. Keno Lünsdorf1 1Department of Sedimentology and Environmental Geology, Geoscience Centre Göttingen, University of Göttingen, Göttingen, D-37077, Germany 2Institute of Geology, TU Bergakademie Freiberg, Freiberg, D-09599…
	Garnet grain details				Size of hyperspectral Raman cuboid				Mineral inclusions																																						Garnet centre composition (wt%)
	sample number	mount label	grain-size fraction	garnet number	width [µm]	heigt [µm]	depth [µm]	number of spectra	Qz	Crs	Trd	Rt	Ant	Br	PsBr	Afs	Pl	Kok	Kmd	Gr	Ms−Pg	Phl−Bt	Prl	Chl	Cpx (Aug)	Opx	Amp	Ep	Ttn	St	Sil	Dck	Dsp	Bhm	Zrn	Mnz	Xtm	Cb	Ap	Ilm	Hem	Py	Opq	Unk	FI	remarks	SiO2	MgO	CaO
	JS-NGO-01s	NGO-HM1	63-125	1	90	80	26	23400	yes	-	-	-	-	-	-	-	-	-	-	-	-	-	-	-	-	-	-	-	-	-	-	-	-	-	-	-	-	-	-	-	-	-	-	-	-	-	37.88	2.66	7.05
	JS-NGO-01s	NGO-HM1	63-125	2	110	120	26	42900	-	-	-	-	-	-	-	-	-	-	-	-	-	-	-	-	-	-	-	-	-	-	-	-	-	-	-	-	-	-	-	-	yes	-	-	-	-	-	38.97	8.94	1.3181
	JS-NGO-01s	NGO-HM1	63-125	3	110	80	34	37400	-	-	-	-	-	-	-	-	-	-	-	-	-	-	-	-	-	-	-	-	-	-	yes	-	-	-	-	-	-	-	-	-	-	-	-	-	-	-	38.6	7.46	0.8566
	JS-NGO-01s	NGO-HM1	63-125	4	80	90	26	23400	yes	-	-	yes	-	-	-	-	-	-	-	-	-	-	-	-	-	-	-	-	-	-	-	-	-	-	-	-	-	-	-	-	-	-	-	-	-	-	39.21	9.27	0.9343
	JS-NGO-01s	NGO-HM1	63-125	5	130	110	28	50050	yes	-	-	-	-	-	-	-	-	-	-	-	-	-	-	-	-	-	-	-	-	-	-	-	-	-	-	-	-	-	yes	-	-	-	-	-	-	-	38.74	7.98	0.64
	JS-NGO-01s	NGO-HM1	63-125	6	50	120	18	13500	-	-	-	-	-	yes	-	-	-	-	-	-	-	-	-	-	-	-	-	-	-	-	yes	-	-	-	-	-	-	-	-	-	-	-	-	-	-	-	38.6	8.73	1.2148
	JS-NGO-01s	NGO-HM1	63-125	7	80	80	20	16000	-	-	-	yes	yes	-	-	-	-	-	-	yes	-	-	-	-	-	-	-	-	-	-	-	-	-	-	-	-	-	-	-	-	-	-	-	-	-	-	39.07	9.15	1.2758
	JS-NGO-01s	NGO-HM1	63-125	8	110	130	40	71500	yes	-	-	-	-	-	-	-	yes	-	-	-	-	-	-	-	-	-	-	-	-	-	-	-	-	-	-	-	-	-	-	-	-	-	-	-	-	-	37.77	1.93	8.83
	JS-NGO-01s	NGO-HM1	63-125	9	160	120	26	62400	-	-	-	-	-	-	-	-	-	-	-	-	-	-	yes	-	-	-	yes	-	-	-	-	-	-	-	-	-	yes	yes	-	-	-	-	-	-	yes	pyrophyllite + carbonate + CO2, amphibole + xenotime	38.34	6.27	1.84
	JS-NGO-01s	NGO-HM1	63-125	10	70	90	14	11025	yes	-	-	-	-	-	-	-	-	-	-	-	-	-	-	-	-	-	-	-	-	-	-	-	-	-	-	-	-	-	-	-	-	-	-	-	-	-	38.59	4.66	7.51
	JS-NGO-01s	NGO-HM1	63-125	11	160	90	22	39600	-	-	-	-	-	yes	-	-	-	-	-	-	-	-	-	-	-	-	-	-	-	-	-	-	-	-	-	yes	-	-	-	-	-	-	-	-	-	brookite + monazite	39.29	10.25	1.0167
	JS-NGO-01s	NGO-HM1	63-125	12	140	80	22	30800	-	-	-	-	-	-	-	-	-	-	-	-	-	-	-	-	-	-	-	-	-	-	yes	-	-	-	-	-	-	-	-	-	-	-	-	-	-	-	37.94	5.72	0.9786
	JS-NGO-01s	NGO-HM1	63-125	13	120	110	16	26400	yes	-	-	-	-	-	-	-	-	-	-	-	-	-	-	-	-	-	-	-	-	-	-	-	-	-	-	-	-	-	-	-	-	-	-	-	-	-	38.25	5.94	2.86
	JS-NGO-01s	NGO-HM1	63-125	14	110	70	18	17325	yes	-	-	-	-	-	-	-	-	-	-	-	-	-	-	-	-	-	-	-	-	-	-	-	-	-	-	-	-	-	-	-	-	-	-	-	-	-	38.14	5.53	3.07
	JS-NGO-01s	NGO-HM1	63-125	15	100	110	20	27500	yes	-	-	-	-	-	-	-	-	-	-	-	-	-	-	-	-	-	-	-	-	-	-	-	-	-	-	-	-	-	-	-	-	-	-	-	-	-	38.82	8.08	2.69
	JS-NGO-01s	NGO-HM1	63-125	16	70	100	18	15750	yes	-	-	-	-	-	-	-	-	-	-	-	-	-	-	-	-	-	-	-	-	-	-	-	-	-	-	-	-	-	-	-	-	-	-	-	-	-	38.25	5.78	1.95
	JS-NGO-01s	NGO-HM1	63-125	17	100	90	24	27000	yes	-	-	-	-	-	-	-	-	-	-	-	-	yes	-	-	yes	-	-	-	-	-	-	-	-	-	-	-	-	-	yes	-	-	-	-	yes	-	-	38.21	3.66	7.27
	JS-NGO-01s	NGO-HM1	63-125	18	100	90	22	24750	-	-	-	-	-	-	-	-	-	-	-	-	-	-	-	-	-	-	-	-	-	-	-	-	-	-	-	-	-	-	-	-	-	-	yes	-	-	-	37.22	1.3729	7.58
	JS-NGO-01s	NGO-HM1	63-125	19	120	210	24	75600	-	-	-	-	-	-	-	-	-	-	-	-	-	-	-	-	-	-	yes	-	-	-	-	-	-	-	-	-	-	-	-	-	-	-	-	-	-	-	38.37	4.15	7.24
	JS-NGO-01s	NGO-HM1	63-125	20	100	60	20	15000	-	-	-	-	-	-	-	-	-	-	-	-	-	-	-	-	-	-	-	-	-	-	-	yes	-	-	-	-	-	-	-	-	-	-	-	-	-	-	38.35	6.29	1.3733
	JS-NGO-01s	NGO-HM1	63-125	21	110	90	16	19800	-	-	-	-	-	-	-	-	-	-	-	-	-	-	-	-	-	-	-	-	-	-	-	-	-	-	-	-	-	-	-	-	-	-	-	yes	-	-	38.01	4.71	2.62
	JS-NGO-01s	NGO-HM1	63-125	22	80	50	18	9000	-	-	-	-	-	-	-	-	-	-	-	-	-	-	-	-	-	-	-	-	-	-	yes	-	-	-	-	-	-	-	-	-	-	-	-	-	-	-	37.49	3.01	1.0177
	JS-NGO-01s	NGO-HM1	63-125	23	100	90	22	24750	-	-	-	-	-	-	-	-	-	-	-	-	-	-	-	-	-	-	-	-	-	-	yes	-	-	-	-	-	-	-	-	-	-	-	-	-	-	-	38.65	8.12	1.0209
	JS-NGO-01s	NGO-HM1	63-125	24	80	70	28	19600	-	-	-	yes	-	-	-	-	-	-	-	-	-	-	-	-	-	-	-	-	-	-	yes	-	-	-	-	-	-	-	-	-	-	-	-	-	-	-	39.03	9	0.8307
	JS-NGO-01s	NGO-HM1	63-125	25	90	130	40	58500	-	-	-	-	-	-	-	-	-	-	-	yes	-	-	-	-	-	-	-	-	-	-	-	-	-	-	-	-	-	yes	-	-	-	-	-	-	yes	graphite + carbonate	38.4	5.75	3.34
	JS-NGO-01s	NGO-HM1	63-125	26	70	70	24	14700	-	-	-	yes	-	-	-	-	-	-	-	-	-	-	-	-	-	-	-	-	-	-	-	-	-	-	-	-	-	-	-	-	-	-	-	-	-	-	39.43	8.63	6.29
	JS-NGO-01s	NGO-HM1	63-125	27	70	90	20	15750	-	-	-	-	-	-	-	-	-	-	-	-	-	-	-	-	-	-	-	-	-	-	yes	-	-	-	-	-	-	-	-	-	-	-	-	-	-	-	38.72	9.8	0.7948
	JS-NGO-01s	NGO-HM1	63-125	28	110	110	12	18150	-	-	-	-	-	-	-	-	-	-	-	-	-	-	-	-	-	-	-	-	-	-	-	-	-	-	-	-	-	yes	-	-	-	-	-	-	-	grossular-rich	38.45	0.2141	34.22
	JS-NGO-01s	NGO-HM1	63-125	29	90	130	26	38025	-	-	-	-	-	-	-	-	-	-	-	-	-	-	-	-	-	-	-	-	-	-	-	yes	-	-	-	-	-	-	-	-	-	-	-	-	-	-	39.08	9.65	0.786
	JS-NGO-01s	NGO-HM1	63-125	30	170	160	38	129200	-	-	-	yes	-	-	-	-	-	-	-	-	-	-	-	-	-	-	-	-	-	-	-	-	-	-	-	-	-	-	-	-	-	yes	-	-	-	-	38.58	7.74	1.6
	JS-NGO-01s	NGO-HM1	63-125	31	110	110	14	21175	-	-	-	-	-	-	-	-	-	-	-	-	-	-	-	-	-	-	-	-	-	-	yes	-	-	-	-	-	-	-	-	-	-	-	-	-	-	-	38.79	8.31	1.1776
	JS-NGO-01s	NGO-HM1	63-125	32	70	120	34	35700	-	-	-	yes	-	-	-	-	-	-	-	-	-	-	yes	-	-	-	-	-	-	-	-	-	-	-	yes	-	-	yes	yes	-	-	-	yes	-	yes	opaque probably sphalerite, pyrophyllite + carbonate	37.96	3.69	5.05
	JS-NGO-01s	NGO-HM1	63-125	33	80	70	18	12600	-	-	-	-	-	-	-	-	-	-	-	-	-	-	-	-	-	-	-	-	-	-	yes	-	-	-	-	-	-	-	-	-	-	-	-	-	-	-	38.37	7.63	1.0003
	JS-NGO-01s	NGO-HM1	63-125	34	70	90	18	14175	-	-	-	-	-	-	-	-	-	-	-	-	-	-	-	-	-	-	-	-	-	-	yes	-	-	-	-	-	-	-	-	-	-	-	-	-	-	-	38.72	7.76	1.0188
	JS-NGO-01s	NGO-HM1	63-125	35	140	110	26	50050	-	-	-	-	-	-	-	-	-	-	-	-	-	-	-	-	-	-	-	-	-	-	yes	-	-	-	-	-	-	-	-	-	-	-	-	-	-	-	39.9	11.85	0.9675
	JS-NGO-01s	NGO-HM1	63-125	36	120	100	40	60000	-	-	-	-	yes	-	-	-	-	-	-	-	-	-	-	-	-	-	-	-	-	-	yes	-	-	-	-	-	-	-	-	-	-	-	-	-	-	-	38.8	8.2	1.1206
	JS-NGO-01s	NGO-HM1	63-125	37	120	140	30	63000	-	-	-	yes	-	-	-	-	-	-	-	yes	-	-	yes	-	-	-	-	-	-	-	-	-	-	-	-	-	-	yes	-	-	-	-	yes	-	yes	opaque probably sphalerite, graphite + pyrophyllite + carbonate	38.7	7.99	1.0547
	JS-NGO-01s	NGO-HM1	63-125	38	110	90	18	22275	-	-	-	-	-	-	-	-	-	-	-	-	-	-	-	-	-	-	-	-	-	-	yes	-	-	-	-	-	-	-	-	-	-	-	-	-	-	-	38.73	9.08	0.8885
	JS-NGO-01s	NGO-HM1	63-125	39	70	100	18	15750	-	-	-	-	-	-	-	-	-	-	-	-	-	-	-	yes	-	-	-	-	-	-	-	-	-	-	-	-	-	-	-	-	-	-	-	-	-	-	39.65	11.73	1.0712
	JS-NGO-01s	NGO-HM1	63-125	40	110	100	40	55000	-	-	-	-	-	-	-	-	-	-	-	-	-	-	-	-	-	-	-	-	-	-	-	-	-	-	yes	-	-	-	-	-	-	-	-	-	-	-	38.39	8.29	0.877
	JS-NGO-01s	NGO-HM1	63-125	41	150	100	40	75000	-	-	-	-	-	-	-	-	-	-	-	-	-	yes	-	-	-	-	-	-	-	-	-	-	-	-	-	-	-	-	-	-	-	-	-	-	-	-	39.1	10.26	1.1861
	JS-NGO-01s	NGO-HM1	63-125	42	70	60	12	6300	yes	-	-	yes	-	-	-	-	-	-	-	-	-	-	-	-	-	-	-	-	-	-	-	-	-	-	-	-	-	-	-	-	-	-	-	-	-	-	38.56	4.62	8.23
	JS-NGO-01s	NGO-HM1	63-125	43	70	90	26	20475	-	-	-	yes	-	-	-	-	-	-	-	-	-	-	-	-	-	-	-	-	-	-	-	-	-	-	-	-	-	-	-	-	-	-	-	-	-	-	38.12	5.28	1.0538
	JS-NGO-01s	NGO-HM1	63-125	44	120	120	24	43200	yes	-	-	yes	-	-	-	-	-	-	-	-	-	-	-	-	-	-	-	-	-	-	-	-	-	-	-	-	-	-	-	-	-	-	-	-	-	-	38.55	6.6	1.91
	JS-NGO-01s	NGO-HM1	63-125	45	120	90	40	54000	-	-	-	-	-	-	-	-	-	-	-	yes	-	-	-	-	-	-	-	-	-	-	-	-	-	-	-	-	-	-	-	-	-	-	yes	-	yes	CO2	38.75	7.34	0.9338
	JS-NGO-01s	NGO-HM1	63-125	46	160	180	40	144000	-	-	-	-	-	-	-	-	-	-	-	-	-	-	-	-	-	-	-	-	-	-	yes	-	-	-	-	-	-	-	-	-	-	-	-	-	-	-	39.16	9.61	0.8013
	JS-NGO-01s	NGO-HM1	63-125	47	110	150	40	82500	-	-	-	yes	-	-	-	-	-	-	-	yes	-	-	-	-	-	-	-	-	-	-	-	-	-	-	yes	-	-	-	-	-	-	-	-	-	-	-	38.79	7.44	1.259
	JS-NGO-01s	NGO-HM1	63-125	48	110	110	24	36300	-	-	-	-	-	-	-	-	-	-	-	-	-	-	-	-	-	-	-	-	-	-	yes	-	-	-	-	-	-	-	-	-	-	-	-	-	-	-	38.81	7.98	1.2428
	JS-NGO-01s	NGO-HM1	63-125	49	90	90	40	40500	yes	-	-	-	-	-	-	-	-	-	-	-	-	-	-	-	yes	-	-	-	-	-	-	-	-	-	-	-	-	-	-	-	-	-	-	yes	-	-	38.33	4.15	7.09
	JS-NGO-01s	NGO-HM1	63-125	50	140	140	28	68600	yes	-	-	-	-	-	-	-	-	-	-	-	-	-	-	-	yes	-	-	-	-	-	-	-	-	-	-	-	-	-	yes	-	-	-	-	-	-	-	38.63	4.47	7.67
	JS-NGO-01s	NGO-HM1	63-125	51	120	110	14	23100	-	-	-	-	-	-	-	-	-	-	-	-	yes	-	-	-	-	-	yes	-	-	-	-	-	-	-	-	-	-	-	-	-	-	-	-	-	-	-	37.94	5.6	2.04
	JS-NGO-01s	NGO-HM1	63-125	52	100	80	20	20000	-	-	-	-	-	-	-	-	-	-	-	-	-	-	-	-	-	-	-	-	-	-	-	-	-	-	-	-	-	yes	-	-	-	-	-	-	-	-	37.89	5.42	3.66
	JS-NGO-01s	NGO-HM1	63-125	53	110	110	18	27225	yes	-	-	-	-	-	-	-	-	-	-	-	-	-	-	-	-	-	-	-	-	-	-	-	-	-	-	-	-	-	-	-	-	-	-	-	-	-	37.78	3.75	2.48
	JS-NGO-01s	NGO-HM1	63-125	54	100	80	26	26000	yes	-	-	-	-	-	-	-	-	-	-	-	-	-	-	-	-	-	-	-	-	-	-	-	-	-	-	-	-	-	-	-	-	-	-	-	-	-	37.55	1.2149	8.2
	JS-NGO-01s	NGO-HM1	63-125	55	90	140	32	50400	yes	-	-	-	-	-	-	-	-	-	-	-	-	-	-	-	-	-	-	-	-	-	-	-	-	-	yes	-	-	-	-	-	-	-	-	-	-	-	37.93	2.91	7.23
	JS-NGO-01s	NGO-HM1	63-125	56	120	90	34	45900	-	-	-	-	-	-	-	-	-	-	-	-	-	-	-	-	-	-	-	-	-	-	yes	yes	-	-	-	-	-	-	-	-	-	-	-	-	-	-	38.71	8.24	1.098
	JS-NGO-01s	NGO-HM1	63-125	57	130	40	20	13000	-	-	-	-	-	-	-	-	-	-	-	-	-	-	-	-	-	-	-	-	-	-	yes	-	-	-	-	-	-	-	-	-	-	-	-	-	-	-	38.53	7.49	1.43
	JS-NGO-01s	NGO-HM1	63-125	58	120	120	40	72000	-	-	-	-	-	-	-	-	-	-	-	yes	-	-	-	-	-	-	-	-	-	-	-	-	-	-	-	-	-	-	-	-	-	-	-	-	-	-	39.06	9.44	1.0447
	JS-NGO-01s	NGO-HM1	63-125	59	130	150	40	97500	-	-	-	-	-	-	-	-	-	-	-	-	-	-	-	-	-	-	yes	-	-	-	-	-	-	-	-	-	-	-	-	-	-	-	-	-	-	-	38.79	5.41	7.04
	JS-NGO-01s	NGO-HM1	63-125	60	80	80	26	20800	-	-	-	-	-	-	-	-	-	-	-	-	-	-	-	-	-	-	-	-	-	-	-	yes	-	-	-	-	-	-	-	-	-	-	-	-	-	-	39.32	11.05	1.0878
	JS-NGO-01s	NGO-HM1	63-125	62	140	120	40	84000	-	-	-	-	-	-	-	-	-	-	-	-	-	-	-	-	-	-	-	-	-	-	yes	-	-	-	-	-	-	-	-	-	-	-	-	-	-	-	38.14	5.93	0.8725
	JS-NGO-01s	NGO-HM1	63-125	63	150	170	40	127500	-	-	-	-	-	-	-	-	-	-	-	-	-	-	yes	-	-	-	-	-	-	-	-	-	-	-	yes	-	-	yes	-	-	-	-	-	-	yes	pyrophyllite + carbonate + CO2	37.4	3.65	1.7
	JS-NGO-01s	NGO-HM1	63-125	64	100	80	40	40000	yes	-	-	-	-	-	-	-	-	-	-	-	-	-	-	-	-	-	-	-	-	-	-	-	-	-	-	-	-	-	-	-	-	-	-	-	-	-	38.03	5.63	1.1957
	JS-NGO-01s	NGO-HM1	63-125	65	100	100	22	27500	yes	-	-	-	-	-	-	-	-	-	-	-	-	yes	-	-	-	-	-	-	-	-	-	-	-	-	-	-	-	-	-	-	-	-	-	-	-	-	38.65	7.84	0.9121
	JS-NGO-01s	JS-NGO-1s_63-125_2nd	63-125	66	90	100	14	15750	yes	-	-	-	-	-	-	-	-	-	-	-	-	-	-	-	-	-	-	-	-	-	-	-	-	-	-	-	-	-	-	-	-	-	-	-	-	-	37.87	3.24	7
	JS-NGO-01s	JS-NGO-1s_63-125_2nd	63-125	67	100	100	16	20000	-	-	-	-	-	-	-	-	-	-	-	-	-	-	-	-	-	-	-	-	-	-	yes	-	-	-	-	-	-	-	-	-	-	-	-	-	-	-	39.61	11.87	0.8964
	JS-NGO-01s	JS-NGO-1s_63-125_2nd	63-125	68	140	90	12	18900	-	-	-	-	-	-	-	-	-	-	-	-	-	-	-	-	-	-	-	-	-	-	-	yes	-	-	-	-	-	-	-	-	-	-	-	-	-	-	38.7	6.68	0.9734
	JS-NGO-01s	JS-NGO-1s_63-125_2nd	63-125	70	130	120	38	74100	-	-	-	-	-	-	-	-	-	-	-	-	-	-	yes	-	-	-	-	-	-	-	-	-	-	-	-	-	-	yes	-	-	-	-	-	-	yes	pyrophyllite + carbonate + CO2 + CH4	38.09	5.43	1.1165
	JS-NGO-01s	JS-NGO-1s_63-125_2nd	63-125	71	150	140	24	63000	-	-	-	yes	-	-	-	-	-	-	-	-	-	-	-	yes	-	-	-	-	-	-	-	-	-	-	-	-	-	-	-	-	-	-	-	yes	-	-	39.29	9.48	1.64
	JS-NGO-01s	JS-NGO-1s_63-125_2nd	63-125	72	140	140	30	73500	yes	-	-	-	-	-	-	-	-	-	-	-	-	-	-	-	-	-	-	-	-	-	yes	-	-	-	-	-	-	-	-	-	-	-	-	-	-	-	37.94	5.61	0.9873
	JS-NGO-01s	JS-NGO-1s_63-125_2nd	63-125	73	100	90	18	20250	yes	-	-	-	-	-	-	-	-	-	-	-	-	-	-	-	yes	-	-	-	-	-	-	-	-	-	-	-	-	-	-	-	-	-	yes	-	-	-	38.22	4.41	6.51
	JS-NGO-01s	JS-NGO-1s_63-125_2nd	63-125	75	140	150	34	89250	-	-	-	-	-	-	-	-	-	-	-	-	-	-	-	-	-	-	-	-	-	-	-	-	-	-	-	-	-	-	yes	-	-	-	-	-	-	-	39.16	9.23	1.99
	JS-NGO-01s	JS-NGO-1s_63-125_2nd	63-125	76	90	130	20	29250	yes	-	-	-	-	-	-	-	-	-	-	-	-	-	-	-	-	-	-	-	-	-	-	-	-	-	-	-	-	-	-	-	-	-	yes	-	-	-	37.65	3.31	4.15
	JS-NGO-01s	JS-NGO-1s_63-125_2nd	63-125	77	90	90	24	24300	yes	-	-	-	-	-	-	-	-	-	-	-	-	-	-	-	-	-	-	-	-	-	-	-	-	-	-	-	-	-	-	-	-	-	-	-	-	-	37.62	3.86	6.71
	JS-NGO-01s	JS-NGO-1s_63-125_2nd	63-125	78	120	90	22	29700	-	-	-	-	-	-	-	-	-	-	-	-	-	-	-	-	-	-	-	-	-	-	-	-	-	-	-	-	-	-	-	-	-	-	yes	-	-	-	38.34	5.63	2.46
	JS-NGO-01s	JS-NGO-1s_63-125_2nd	63-125	79	100	90	26	29250	-	-	-	yes	-	-	-	-	-	-	-	-	-	-	-	-	-	-	-	-	-	-	-	-	-	-	-	-	-	-	-	-	-	-	-	-	-	-	39	9.13	1.0977
	JS-NGO-01s	JS-NGO-1s_63-125_2nd	63-125	80	70	60	12	6300	-	-	-	-	-	-	-	-	-	-	-	-	-	-	-	-	-	-	-	-	-	-	-	yes	-	-	-	-	-	-	-	-	-	-	-	-	-	-	38.65	7.95	1.2696
	JS-NGO-01s	JS-NGO-1s_63-125_2nd	63-125	81	140	120	26	54600	yes	-	-	-	-	-	-	-	-	-	-	-	-	-	-	-	-	-	-	-	-	-	-	-	-	-	-	-	-	-	-	-	-	-	-	-	-	-	37.57	2.69	7.5
	JS-NGO-01s	JS-NGO-1s_63-125_2nd	63-125	82	140	120	20	42000	yes	-	-	-	-	-	-	-	-	-	-	-	-	-	-	-	-	-	-	-	-	-	-	-	-	-	yes	-	-	-	-	-	-	-	-	-	-	-	39.25	8.69	2.63
	JS-NGO-01s	JS-NGO-1s_63-125_2nd	63-125	83	90	60	20	13500	yes	-	-	-	-	-	-	-	-	-	-	-	-	-	-	-	-	-	yes	-	-	-	-	-	-	-	-	-	-	-	yes	-	-	-	-	-	-	-	38.44	3.63	8.45
	JS-NGO-01s	JS-NGO-1s_63-125_2nd	63-125	84	100	110	20	27500	yes	-	-	-	-	-	-	-	-	-	-	-	-	-	-	-	-	-	-	-	-	-	-	-	-	-	-	-	-	-	-	-	-	-	-	-	-	-	38.3	3.19	7.14
	JS-NGO-01s	JS-NGO-1s_63-125_2nd	63-125	85	140	170	40	119000	-	-	-	-	-	-	-	-	-	-	-	-	-	-	-	-	-	-	-	-	-	-	-	-	-	-	-	-	-	-	yes	-	-	-	-	-	-	-	37.98	2.76	7.43
	JS-NGO-01s	JS-NGO-1s_63-125_2nd	63-125	86	80	130	26	33800	yes	-	-	-	-	-	-	-	-	-	-	-	-	-	-	-	yes	-	-	-	-	-	-	-	-	-	-	-	-	-	-	-	-	-	-	-	-	-	38.15	3.9	7.35
	JS-NGO-01s	JS-NGO-1s_63-125_2nd	63-125	87	100	80	20	20000	-	-	-	yes	-	-	-	-	-	-	-	-	-	-	-	-	-	-	-	-	-	-	yes	-	-	-	-	-	-	-	-	-	-	-	-	-	-	-	38.96	8.8	1.0602
	JS-NGO-01s	JS-NGO-1s_63-125_2nd	63-125	88	100	80	14	14000	yes	-	-	-	-	-	-	-	-	-	-	yes	-	-	-	-	-	-	-	-	-	-	-	-	-	-	-	-	-	-	-	-	-	-	-	-	-	-	38.83	8.31	1.8
	JS-NGO-01s	JS-NGO-1s_63-125_2nd	63-125	89	120	150	14	31500	-	-	-	-	-	-	-	-	-	-	-	-	-	-	-	-	-	-	-	-	-	-	-	-	-	-	-	-	-	-	-	-	-	-	yes	-	-	-	38.47	6.46	1.42
	JS-NGO-01s	JS-NGO-1s_63-125_2nd	63-125	90	90	100	20	22500	-	-	-	yes	-	-	-	-	-	-	-	yes	-	-	-	-	-	-	-	-	-	-	-	-	-	-	-	-	-	yes	-	-	-	-	-	-	-	rutile + graphite	38.43	6.32	1.84
	JS-NGO-01s	JS-NGO-1s_63-125_2nd	63-125	91	120	120	18	32400	yes	-	-	-	-	-	-	-	-	-	-	-	-	-	-	-	-	-	-	-	-	-	-	-	-	-	-	-	-	yes	yes	-	-	-	-	-	-	-	38.65	4.47	7.5
	JS-NGO-01s	JS-NGO-1s_63-125_2nd	63-125	92	80	90	16	14400	yes	-	-	-	-	-	-	-	-	-	-	-	-	-	-	-	-	-	-	-	-	-	-	-	-	-	-	-	-	-	-	-	-	-	-	-	-	-	38.34	3.44	7.41
	JS-NGO-01s	JS-NGO-1s_63-125_2nd	63-125	93	80	90	14	12600	-	-	-	-	-	-	-	-	-	-	-	-	-	-	-	-	-	-	-	-	-	-	-	-	-	-	-	-	-	yes	-	-	-	-	-	-	-	-	38.99	5.95	8.89
	JS-NGO-01s	JS-NGO-1s_63-125_2nd	63-125	94	90	100	30	33750	-	-	-	-	-	-	-	-	-	-	-	yes	yes	-	-	-	-	-	-	-	-	-	-	-	-	-	-	-	-	-	-	-	-	-	-	-	-	CH4	38.85	7.7	1.2593
	JS-NGO-01s	JS-NGO-1s_63-125_2nd	63-125	95	90	110	26	32175	-	-	-	-	-	-	-	-	-	-	-	-	-	-	-	-	-	-	-	-	-	-	yes	-	-	-	-	-	-	-	-	-	-	-	-	-	-	-	39.67	11.85	1.1613
	JS-NGO-01s	JS-NGO-1s_63-125_2nd	63-125	96	130	130	40	84500	-	-	-	-	-	-	-	-	-	-	-	-	-	-	-	-	-	-	-	-	-	-	-	-	-	-	-	yes	-	-	-	-	-	-	-	-	-	-	39.45	10.76	0.9943
	JS-NGO-01s	JS-NGO-1s_63-125_2nd	63-125	97	90	110	24	29700	yes	-	-	-	-	-	-	-	-	-	-	-	-	-	-	-	-	-	-	-	-	-	-	-	-	-	-	-	-	-	-	-	-	-	-	-	-	-	38.16	3.71	6.92
	JS-NGO-01s	JS-NGO-1s_63-125_2nd	63-125	98	100	100	18	22500	-	-	-	-	-	-	-	-	-	-	-	-	-	-	-	-	-	-	-	-	-	-	yes	-	-	-	-	-	-	-	-	-	-	-	-	-	-	-	38.33	6.19	0.867
	JS-NGO-01s	JS-NGO-1s_63-125_2nd	63-125	101	130	90	14	20475	yes	-	-	-	-	-	-	-	-	-	-	-	-	-	-	-	-	-	-	-	-	-	-	-	-	-	-	-	-	-	-	-	-	-	-	-	-	-	37.79	5.18	1.1194
	JS-NGO-01s	JS-NGO-1s_63-125_2nd	63-125	102	100	120	18	27000	-	-	-	-	-	-	-	-	-	-	-	-	-	-	-	-	-	-	-	-	-	-	yes	-	-	-	-	-	-	-	-	-	-	-	-	-	-	-	38.5	8.05	1.1137
	JS-NGO-01s	NGO-HM3	125-250	1	180	120	40	108000	yes	-	-	-	-	-	-	-	-	-	-	-	-	-	-	yes	-	-	-	-	-	-	yes	-	-	-	-	-	-	-	-	-	-	-	-	-	-	-	39.54	11.91	0.8474
	JS-NGO-01s	NGO-HM3	125-250	2	110	110	20	30250	-	-	-	-	yes	-	-	-	-	-	-	-	-	-	-	-	-	-	-	-	-	-	yes	-	-	-	-	-	-	-	-	-	-	-	-	-	-	-	38.32	6.9	1.0993
	JS-NGO-01s	NGO-HM3	125-250	3	140	140	28	68600	yes	-	-	-	-	-	-	-	-	-	-	-	-	-	-	-	-	-	-	-	-	-	-	-	-	-	-	-	-	-	-	-	-	-	-	-	-	-	39.07	9	1.3519
	JS-NGO-01s	NGO-HM3	125-250	4	160	250	40	200000	-	-	-	-	-	-	-	-	-	-	-	-	-	-	-	-	-	-	-	-	yes	-	-	-	-	-	-	-	-	yes	-	-	-	-	-	-	-	-	38.07	3.15	9.36
	JS-NGO-01s	NGO-HM3	125-250	5	160	240	40	192000	-	-	-	yes	-	-	-	-	-	-	-	yes	-	-	yes	-	-	-	-	-	-	-	-	-	-	-	-	-	-	yes	-	-	-	-	-	-	-	-	38.02	5.73	1.2327
	JS-NGO-01s	NGO-HM3	125-250	6	150	250	60	281250	-	-	-	-	-	-	-	-	-	-	-	-	-	-	-	-	-	-	-	-	-	-	-	-	-	-	yes	-	-	-	-	-	-	-	-	-	-	-	38.61	7.67	0.9177
	JS-NGO-01s	NGO-HM3	125-250	7	100	150	22	41250	-	-	-	yes	yes	-	-	-	-	-	-	-	-	-	-	-	-	-	-	-	-	-	-	-	-	-	-	-	-	-	-	-	-	-	-	-	-	-	39.53	11.3	2.04
	JS-NGO-01s	NGO-HM3	125-250	8	190	130	40	123500	yes	-	-	-	-	-	-	-	-	-	-	-	-	-	-	-	-	-	-	-	-	-	-	-	-	-	-	-	-	-	yes	-	-	-	-	yes	-	-	37.93	3.16	6.79
	JS-NGO-01s	NGO-HM3	125-250	9	100	190	40	95000	-	-	-	-	-	yes	-	-	-	-	-	-	-	-	-	-	-	-	-	-	-	-	yes	-	-	-	-	-	-	-	-	-	-	-	-	-	-	-	38.57	8.37	1.0263
	JS-NGO-01s	NGO-HM3	125-250	10	100	110	40	55000	-	-	-	-	-	-	-	-	-	-	-	-	-	-	-	-	-	-	-	-	-	-	-	-	-	-	-	-	-	yes	-	-	-	-	-	-	-	CO2	38.51	7.57	1.84
	JS-NGO-01s	NGO-HM3	125-250	11	140	100	40	70000	-	-	-	-	-	-	-	-	-	-	-	yes	-	-	-	-	-	-	-	-	-	-	-	-	-	-	-	-	-	-	-	-	-	-	-	-	-	-	38.73	7.77	0.9736
	JS-NGO-01s	NGO-HM3	125-250	13	220	90	40	99000	-	-	-	-	-	-	-	-	-	-	-	-	-	-	-	-	-	-	-	-	-	-	-	-	-	-	yes	-	-	-	-	-	-	-	-	-	-	-	37.97	6.55	1.0868
	JS-NGO-01s	NGO-HM3	125-250	14	130	340	40	221000	yes	-	-	-	-	-	-	-	-	-	-	-	-	-	-	-	-	-	-	-	-	-	-	-	-	-	-	-	-	-	-	-	-	-	-	-	-	-	37.58	4.14	2.17
	JS-NGO-01s	NGO-HM3	125-250	15	160	200	40	160000	-	-	-	-	-	-	-	-	-	-	-	-	-	-	-	-	-	-	-	-	-	-	yes	-	-	-	-	-	-	-	-	-	-	-	-	-	-	-	38.28	7.25	1.44
	JS-NGO-01s	NGO-HM3	125-250	16	180	150	40	135000	yes	-	-	-	-	-	-	-	-	-	-	-	-	-	-	-	-	-	-	-	-	-	yes	-	-	-	-	-	-	-	-	-	-	-	-	-	-	-	38.03	7.54	0.9435
	JS-NGO-01s	NGO-HM3	125-250	17	170	220	40	187000	-	-	-	yes	-	-	-	-	-	-	-	-	-	-	-	-	-	-	-	-	-	-	-	-	-	-	-	-	-	-	-	-	-	-	-	-	-	-	38.77	11.79	1.3268
	JS-NGO-01s	NGO-HM3	125-250	18	210	180	40	189000	yes	-	-	yes	-	-	-	-	-	-	-	-	-	-	-	-	-	-	-	-	-	-	-	-	-	-	-	-	-	-	-	-	-	-	-	-	-	-	36.68	6.78	1.0104
	JS-NGO-01s	NGO-HM3	125-250	19	170	170	40	144500	-	-	-	-	-	-	-	-	-	-	-	-	-	-	-	-	-	-	-	-	-	-	-	-	-	-	yes	-	-	-	-	-	-	-	-	-	-	-	38.26	8.77	1.55
	JS-NGO-01s	NGO-HM3	125-250	20	140	170	40	119000	yes	-	-	-	-	-	-	-	-	-	-	-	-	-	-	-	-	-	-	-	-	-	-	-	-	-	yes	-	-	-	-	-	-	-	-	-	-	-	37.67	6.02	1.0539
	JS-NGO-01s	NGO-HM3	125-250	21	170	160	40	136000	yes	-	-	-	-	-	-	-	-	-	-	-	-	-	-	-	yes	yes	yes	-	-	-	-	-	-	-	-	-	-	-	yes	-	-	-	-	-	-	-	37.75	3.67	6.94
	JS-NGO-01s	NGO-HM3	125-250	22	150	120	40	90000	-	-	-	-	-	-	-	-	-	-	-	-	-	-	-	-	-	-	-	-	-	-	yes	-	-	-	-	-	-	-	-	-	-	-	-	-	-	-	38.45	7.9	0.9487
	JS-NGO-01s	NGO-HM3	125-250	23	180	270	40	243000	-	-	-	yes	-	-	-	-	-	-	-	-	-	-	-	-	-	-	-	-	-	-	-	-	-	-	yes	-	-	-	-	-	-	-	-	-	-	-	39.16	10.59	1.095
	JS-NGO-01s	NGO-HM3	125-250	24	90	100	40	45000	yes	-	-	-	-	-	-	-	-	-	-	-	-	-	-	-	-	-	-	-	-	-	-	-	-	-	-	-	-	-	-	-	-	-	-	-	-	-	38.04	3.69	7.01
	JS-NGO-01s	NGO-HM3	125-250	25	240	170	40	204000	-	-	-	-	-	-	-	-	-	-	-	-	-	-	-	-	-	-	-	-	-	-	yes	-	-	-	-	-	-	-	-	-	-	-	-	-	-	-	36.87	2.86	6.15
	JS-NGO-01s	NGO-HM3	125-250	26	300	140	40	210000	-	-	-	-	-	-	-	-	-	-	-	-	-	yes	-	-	-	-	-	-	-	-	yes	-	-	-	-	-	-	-	-	-	-	-	-	-	-	-	36.49	8.72	0.9101
	JS-NGO-01s	NGO-HM3	125-250	27	180	160	40	144000	-	-	-	yes	-	-	-	-	-	-	-	-	-	-	-	-	-	-	-	yes	-	-	yes	-	-	-	-	-	-	-	-	-	-	-	-	-	-	-	38.72	8.1	1.017
	JS-NGO-01s	NGO-HM3	125-250	29	130	110	40	71500	yes	-	-	-	-	-	-	-	-	-	-	-	-	-	-	-	-	-	-	-	-	-	-	-	-	-	-	-	-	-	-	-	-	-	-	-	-	-	37.5	2.83	1.44
	JS-NGO-01s	NGO-HM3	125-250	30	120	80	40	48000	yes	-	-	-	-	-	-	-	-	-	-	-	-	-	-	-	-	-	-	-	-	-	-	-	-	-	-	-	-	-	yes	-	-	-	-	-	-	-	38	4	7.01
	JS-NGO-01s	NGO-HM3	125-250	31	110	110	40	60500	yes	-	-	-	-	-	-	-	-	-	-	-	-	-	-	-	-	-	-	-	-	-	-	-	-	-	-	-	-	-	-	-	-	-	-	-	-	-	38.18	3.75	7.67
	JS-NGO-01s	NGO-HM3	125-250	32	130	90	40	58500	-	-	-	-	-	-	-	-	-	-	-	-	-	-	-	-	yes	-	-	-	-	-	-	-	-	-	-	-	-	-	-	-	-	-	-	-	-	-	38.55	6.06	6.57
	JS-NGO-01s	NGO-HM3	125-250	33	160	230	40	184000	-	-	-	-	-	-	-	-	-	-	-	-	-	-	-	-	-	-	yes	-	-	-	-	-	-	-	-	-	-	-	-	-	-	-	-	-	-	CO2	37.71	4.06	2.48
	JS-NGO-01s	NGO-HM3	125-250	34	150	110	40	82500	-	-	-	-	-	-	-	-	-	-	-	-	-	-	-	-	-	-	-	-	-	-	yes	-	-	-	-	-	-	-	-	-	-	-	-	-	-	-	38.11	6.4	1.0507
	JS-NGO-01s	NGO-HM3	125-250	35	150	160	40	120000	-	-	-	yes	-	-	-	-	-	-	-	yes	-	-	-	-	-	-	-	-	yes	-	-	-	-	-	-	-	-	-	-	-	-	-	-	-	-	-	37.87	1.5592	10.32
	JS-NGO-01s	NGO-HM3	125-250	36	200	200	40	200000	-	-	-	yes	-	-	-	-	-	-	-	-	-	-	-	-	-	-	-	-	-	-	-	-	-	-	-	-	-	-	yes	-	-	-	-	-	-	-	38.38	9.28	0.9666
	JS-NGO-01s	NGO-HM3	125-250	37	90	200	24	54000	-	-	-	-	-	-	-	-	-	-	-	-	-	-	-	-	-	-	-	-	-	-	-	yes	-	-	-	-	-	-	-	-	-	-	-	-	-	-	39.01	9.4	0.9586
	JS-NGO-01s	NGO-HM3	125-250	38	190	140	40	133000	-	-	-	-	-	-	-	-	-	-	-	-	-	-	-	-	-	-	-	-	-	-	yes	-	-	-	-	-	-	-	-	-	-	-	-	-	-	-	38.13	6.08	0.953
	JS-NGO-01s	NGO-HM3	125-250	39	160	190	40	152000	yes	-	-	-	-	-	-	-	-	-	-	-	-	-	-	-	-	-	-	-	-	-	-	-	-	-	-	-	-	-	-	-	-	-	-	-	-	-	38.22	7.22	0.8512
	JS-NGO-01s	NGO-HM3	125-250	40	110	140	40	77000	-	-	-	-	-	-	-	-	-	-	-	-	-	yes	-	-	-	-	-	-	-	-	-	-	-	-	-	-	-	-	-	-	-	-	-	-	-	-	37.3	2.04	4.97
	JS-NGO-01s	NGO-HM3	125-250	41	380	180	40	342000	-	-	-	yes	-	-	-	-	-	-	-	-	-	-	-	-	-	-	-	-	-	-	-	-	-	-	-	-	-	yes	-	-	-	-	-	-	-	-	38.22	6.12	2.42
	JS-NGO-01s	NGO-HM3	125-250	42	210	150	40	157500	-	-	-	-	-	-	-	-	-	-	-	-	-	-	-	-	-	-	-	-	-	-	yes	-	-	-	-	-	-	-	-	-	-	-	-	-	-	-	38.82	9.16	0.7365
	JS-NGO-01s	NGO-HM3	125-250	43	160	200	40	160000	-	-	-	yes	-	-	-	-	-	-	-	-	-	-	-	-	-	-	-	-	-	-	yes	-	-	-	-	-	-	-	-	-	-	-	-	-	-	-	38.65	9.09	0.903
	JS-NGO-01s	NGO-HM3	125-250	44	190	220	40	209000	-	-	-	-	-	-	-	-	-	-	-	-	-	-	-	-	-	-	-	-	-	-	yes	-	-	-	-	-	-	-	-	-	-	-	-	-	-	-	38.68	8.3	1.0621
	JS-NGO-01s	NGO-HM3	125-250	45	150	100	40	75000	-	-	-	-	-	-	-	-	-	-	-	-	-	-	-	-	-	-	-	-	-	-	-	-	-	-	yes	-	-	-	-	-	-	-	-	-	-	-	38.77	9.39	0.8226
	JS-NGO-01s	NGO-HM3	125-250	46	170	270	40	229500	-	-	-	yes	-	-	-	-	-	-	-	-	-	-	-	-	-	-	-	-	-	-	yes	-	-	-	-	-	-	-	-	-	-	-	-	-	-	-	38.58	8.65	0.9724
	JS-NGO-01s	NGO-HM3	125-250	47	140	290	40	203000	yes	-	-	-	-	-	-	-	-	-	-	-	-	-	-	-	-	-	-	-	-	-	yes	-	-	-	-	-	-	-	-	-	-	-	-	-	-	-	38.46	7.53	1.0136
	JS-NGO-01s	NGO-HM3	125-250	48	220	200	40	220000	-	-	-	-	-	-	-	-	-	-	-	-	-	-	-	-	-	-	-	-	-	-	yes	-	-	-	-	-	-	-	-	-	-	-	-	-	-	-	38.69	8.66	0.9448
	JS-NGO-01s	NGO-HM3	125-250	49	170	200	40	170000	-	-	-	-	-	-	-	-	-	-	-	-	-	-	-	-	-	-	-	-	-	-	-	-	-	-	yes	-	-	-	-	-	-	-	-	-	-	-	37.48	4.79	1.1511
	JS-NGO-01s	NGO-HM3	125-250	50	190	140	40	133000	-	-	-	yes	-	-	-	-	-	-	-	-	-	-	-	-	-	-	-	-	-	-	-	-	-	-	-	-	-	-	-	-	-	-	-	-	-	fine needles of rutile	38.51	7.23	2.07
	JS-NGO-01s	NGO-HM3	125-250	51	140	130	40	91000	yes	-	-	-	-	-	-	-	-	-	-	-	-	-	-	-	-	-	-	-	-	-	-	-	-	-	-	-	-	-	-	-	-	-	-	-	-	-	38.31	5.42	5.67
	JS-NGO-01s	NGO-HM3	125-250	52	190	180	40	171000	yes	-	-	-	-	-	-	-	-	-	-	-	-	-	-	-	-	-	-	-	-	-	-	-	-	-	-	-	-	-	yes	-	-	-	-	-	-	-	38.29	7.06	1.0714
	JS-NGO-01s	NGO-HM3	125-250	53	280	190	32	212800	yes	-	-	-	-	-	-	-	-	-	-	-	-	-	-	-	-	-	-	-	-	-	yes	-	-	-	-	-	-	-	-	-	-	-	-	-	-	-	37.85	2.64	8.13
	JS-NGO-01s	NGO-HM3	125-250	54	190	190	40	180500	-	-	-	-	-	-	-	-	-	-	-	yes	-	-	-	-	-	-	-	-	-	-	-	-	-	-	-	-	-	yes	-	-	-	-	-	-	-	-	38.66	8.29	1.3284
	JS-NGO-01s	NGO-HM3	125-250	55	70	60	40	21000	-	-	-	-	-	-	-	-	-	-	-	-	-	-	-	-	-	-	-	-	-	-	-	-	-	-	-	-	-	-	-	-	-	yes	-	-	-	-	39.31	12.24	1.1151
	JS-NGO-01s	NGO-HM3	125-250	56	150	200	40	150000	yes	-	-	-	-	-	-	-	-	-	-	-	-	-	-	-	-	-	-	-	-	-	-	-	-	-	-	-	-	-	yes	-	-	-	-	-	-	-	38.29	6.77	2.14
	JS-NGO-01s	NGO-HM3	125-250	57	170	140	40	119000	yes	-	-	-	-	-	-	-	-	-	-	yes	-	-	-	-	-	-	-	-	-	-	yes	-	-	-	-	-	-	-	-	-	-	-	-	-	-	-	39.16	10.66	1.0332
	JS-NGO-01s	NGO-HM3	125-250	58	50	90	16	9000	yes	-	-	-	-	-	-	-	-	-	-	-	-	-	-	-	-	-	-	-	-	-	-	-	-	-	-	-	-	-	-	-	-	-	-	-	-	-	38.03	4.43	6.67
	JS-NGO-01s	NGO-HM3	125-250	59	150	440	40	330000	-	-	-	yes	-	-	-	-	-	-	-	-	-	-	-	-	-	-	-	-	-	-	yes	-	-	-	-	-	-	-	-	-	-	-	-	-	-	-	39.07	8.13	1.0692
	JS-NGO-01s	NGO-HM3	125-250	60	140	220	40	154000	-	-	-	-	-	-	-	-	-	-	-	-	-	-	-	-	-	-	-	-	-	-	-	-	-	-	yes	-	-	-	-	-	-	-	-	-	-	-	38.69	8.89	1.3967
	JS-NGO-01s	NGO-HM3	125-250	61	280	240	40	336000	-	-	-	yes	-	yes	-	-	yes	-	-	yes	-	-	-	-	-	-	-	-	-	-	-	-	-	-	-	-	-	-	-	-	-	-	-	-	-	-	39.44	10.73	1.0729
	JS-NGO-01s	NGO-HM3	125-250	62	90	100	40	45000	-	-	-	-	-	-	-	-	-	-	-	-	-	-	-	-	-	-	yes	-	-	-	-	-	-	-	-	-	-	-	-	-	-	-	-	-	-	-	38.3	3.49	9.76
	JS-NGO-01s	NGO-HM5	125-250	63	200	140	40	140000	-	-	-	yes	-	-	-	-	-	-	-	-	-	-	-	-	-	-	-	-	-	-	-	-	-	-	-	-	-	-	-	-	-	-	-	-	-	-	38.39	6.46	2.77
	JS-NGO-01s	NGO-HM5	125-250	64	150	100	40	75000	yes	-	-	-	-	-	-	-	-	-	-	-	-	yes	-	-	-	-	-	-	-	-	-	-	-	-	-	-	-	-	-	-	-	-	-	yes	-	-	38.58	8.04	1.84
	JS-NGO-01s	NGO-HM5	125-250	65	210	170	40	178500	-	-	-	-	-	yes	-	-	-	-	-	-	-	-	-	-	-	-	-	-	-	-	-	-	-	-	-	-	-	-	-	-	-	-	-	-	-	-	38.6	8.29	1.0813
	JS-NGO-01s	NGO-HM5	125-250	66	90	110	40	49500	yes	-	-	-	-	-	-	-	-	-	-	-	-	-	-	-	-	-	-	-	-	-	yes	-	-	-	-	-	-	-	-	-	-	-	-	-	-	-	38.66	8.65	1.1574
	JS-NGO-01s	NGO-HM5	125-250	67	190	390	40	370500	-	-	-	-	-	-	-	-	-	-	-	-	-	-	-	-	-	-	-	-	-	-	yes	-	-	-	yes	-	-	-	-	-	-	-	-	-	-	-	38.94	8.55	1.1312
	JS-NGO-01s	NGO-HM5	125-250	68	140	160	40	112000	-	-	-	-	-	-	-	-	yes	-	-	-	-	-	-	-	-	-	-	-	-	-	-	-	-	-	-	-	-	-	-	-	-	-	-	yes	-	-	38.04	2.36	10.22
	JS-NGO-01s	NGO-HM5	125-250	69	180	250	40	225000	-	-	-	-	-	-	-	-	-	-	-	-	-	-	yes	-	-	-	-	-	-	-	-	-	-	-	-	-	-	yes	-	-	-	-	-	-	yes	pyrophyllite + carbonate	38.06	4.58	3.65
	JS-NGO-01s	NGO-HM5	125-250	70	210	200	40	210000	-	-	-	-	-	-	-	-	-	-	-	-	-	-	-	-	-	-	-	-	-	-	-	-	-	-	-	-	-	-	-	-	yes	-	-	-	-	-	39.37	11.86	1.0994
	JS-NGO-01s	NGO-HM5	125-250	71	270	220	40	297000	-	-	-	-	-	-	-	-	-	-	-	-	-	-	-	-	-	-	-	-	-	-	yes	-	-	-	-	-	-	-	-	-	-	-	-	-	-	-	38.89	9.18	0.891
	JS-NGO-01s	NGO-HM5	125-250	72	140	140	50	122500	-	-	-	-	-	-	-	-	-	-	-	-	-	-	-	-	-	-	-	-	-	-	-	-	-	-	yes	-	-	-	-	-	-	-	-	-	-	-	38.38	8.14	1.0546
	JS-NGO-01s	NGO-HM5	125-250	73	230	140	40	161000	-	-	-	-	-	-	-	-	-	-	-	-	-	yes	-	-	-	-	-	-	-	-	-	-	-	-	-	-	-	-	-	-	-	-	-	yes	-	-	38.87	8.54	0.9835
	JS-NGO-01s	NGO-HM5	125-250	74	160	180	40	144000	yes	-	-	-	-	-	-	-	yes	-	-	-	-	-	-	-	-	-	yes	-	-	-	-	-	-	-	-	-	-	yes	yes	-	-	-	-	-	-	-	37.77	2.62	9.14
	JS-NGO-01s	NGO-HM5	125-250	75	140	190	40	133000	-	-	-	-	-	-	-	-	-	-	-	-	-	-	-	-	-	-	-	-	-	-	-	yes	-	-	-	-	-	-	-	-	-	-	-	yes	-	-	38.83	8.79	1.0473
	JS-NGO-01s	NGO-HM5	125-250	76	160	200	40	160000	-	-	-	-	-	-	-	-	-	-	-	-	-	-	-	-	-	-	-	-	-	-	yes	-	-	-	-	-	-	-	-	-	-	-	-	-	-	-	38.43	7.81	1.0014
	JS-NGO-01s	NGO-HM5	125-250	77	320	230	40	368000	-	yes	-	-	-	-	-	-	-	-	-	-	-	-	-	-	-	-	-	-	-	-	-	-	-	-	-	-	yes	yes	-	-	-	-	-	-	-	cristobalite + xenotime + carbonate + CO2	39.32	11.82	1.0626
	JS-NGO-01s	NGO-HM5	125-250	78	210	160	40	168000	yes	-	-	-	-	-	-	-	-	-	-	-	-	-	-	-	-	-	-	-	-	-	-	-	-	-	-	-	-	-	-	-	-	-	-	-	-	-	37.81	6.19	0.735
	JS-NGO-01s	NGO-HM5	125-250	79	160	120	40	96000	yes	-	-	-	-	-	-	-	-	-	-	-	-	-	-	-	-	-	-	-	-	-	-	-	-	-	-	-	-	-	-	-	-	-	-	-	-	-	37.09	2.26	1.88
	JS-NGO-01s	NGO-HM5	125-250	80	100	160	40	80000	-	-	-	-	-	-	-	-	-	-	-	-	-	-	-	-	-	-	-	-	-	-	yes	-	-	-	-	-	-	-	-	-	-	-	-	-	-	-	38.63	8.47	0.9297
	JS-NGO-01s	NGO-HM5	125-250	81	210	130	40	136500	-	-	-	-	-	-	-	-	-	-	-	-	-	-	-	-	-	-	-	-	-	-	-	-	-	-	yes	-	-	-	-	-	-	-	-	-	-	-	39.18	10.4	1.0682
	JS-NGO-01s	NGO-HM5	125-250	82	240	340	40	408000	-	-	-	-	-	-	-	-	-	-	-	-	-	-	-	-	-	-	-	-	-	-	-	-	-	-	yes	-	-	-	-	-	-	-	-	-	-	-	37.94	2.76	10.24
	JS-NGO-01s	NGO-HM5	125-250	83	230	200	40	230000	yes	-	-	yes	-	-	-	-	-	-	-	-	-	-	-	-	-	-	-	-	-	-	yes	-	-	-	-	-	-	yes	-	-	-	-	-	-	-	-	38.89	9.62	1.0678
	JS-NGO-01s	NGO-HM5	125-250	84	130	280	40	182000	-	-	-	-	-	-	-	-	-	-	-	-	-	-	-	-	-	-	-	-	-	-	yes	-	-	-	-	-	-	-	-	-	-	-	-	-	-	-	38.49	8.01	1.1175
	JS-NGO-01s	NGO-HM5	125-250	85	170	250	40	212500	-	-	-	-	-	-	-	-	-	-	-	-	-	-	-	-	-	-	-	-	-	-	yes	-	-	-	-	-	-	-	-	-	-	-	-	-	-	-	39.21	10.27	1.0996
	JS-NGO-01s	NGO-HM5	125-250	86	120	110	40	66000	yes	-	-	-	-	-	-	-	-	-	-	-	-	-	-	-	-	-	-	-	-	-	-	-	-	-	-	-	-	-	-	-	-	-	-	-	-	-	37.98	4.47	5.68
	JS-NGO-01s	NGO-HM5	125-250	87	150	160	40	120000	-	-	-	-	-	-	-	-	-	-	-	-	-	-	-	-	-	-	-	-	-	-	yes	-	-	-	-	-	-	-	-	-	-	-	-	-	-	-	38.69	8.36	0.9762
	JS-NGO-01s	NGO-HM5	125-250	88	200	140	40	140000	-	-	-	yes	-	-	yes	-	-	-	-	-	-	-	-	yes	-	-	-	-	-	-	-	-	-	-	-	-	-	-	-	-	-	-	-	-	-	-	38.66	8.93	0.8605
	JS-NGO-01s	NGO-HM5	125-250	89	140	200	40	140000	yes	-	-	-	-	-	-	-	-	-	-	-	-	-	-	-	yes	-	-	-	-	-	-	-	-	-	-	-	-	-	-	-	-	-	-	-	-	-	38.14	4.35	8.44
	JS-NGO-01s	NGO-HM5	125-250	90	180	250	40	225000	yes	-	-	-	-	yes	-	-	-	-	-	yes	-	-	-	-	-	-	-	-	-	-	-	-	-	-	-	-	-	-	-	-	-	-	-	-	-	-	38.7	7.8	1.45
	JS-NGO-01s	NGO-HM5	125-250	91	210	190	40	199500	-	-	-	-	-	-	-	-	-	-	-	-	-	yes	-	-	-	-	-	-	-	-	-	-	-	-	-	-	-	-	-	-	-	-	-	yes	-	-	38.54	8.03	1.0989
	JS-NGO-01s	NGO-HM5	125-250	92	100	110	40	55000	-	-	-	yes	-	-	-	-	-	-	-	-	-	-	-	-	-	-	-	-	-	-	-	-	-	-	-	-	-	-	-	-	-	-	-	-	-	-	38.46	7.75	1.0161
	JS-NGO-01s	NGO-HM5	125-250	93	220	170	40	187000	-	-	-	-	-	-	-	-	-	-	-	-	-	-	-	-	-	-	-	-	-	-	yes	-	-	-	-	-	-	-	-	-	-	-	-	-	-	-	38.53	7.69	1.0117
	JS-NGO-01s	NGO-HM5	125-250	94	120	120	40	72000	-	-	-	yes	-	-	-	-	-	-	-	-	-	-	-	-	-	-	-	-	-	-	-	-	-	-	-	-	-	-	-	-	-	-	-	-	-	-	38.24	7.21	1.44
	JS-NGO-01s	NGO-HM5	125-250	95	110	110	40	60500	-	-	-	-	-	-	-	-	-	-	-	-	-	-	-	-	-	-	-	-	-	-	yes	-	-	-	-	-	-	-	-	-	-	-	-	-	-	-	38.25	8.11	0.9811
	JS-NGO-01s	NGO-HM5	125-250	96	210	210	40	220500	yes	-	-	-	-	-	-	-	-	-	-	-	-	-	-	-	-	-	-	-	-	-	-	-	-	-	-	-	-	-	-	-	-	-	-	-	-	-	37.57	4.62	1.79
	JS-NGO-01s	NGO-HM5	125-250	97	180	180	40	162000	yes	-	-	-	-	-	-	-	-	-	-	-	-	-	-	-	-	-	yes	-	-	-	-	-	-	-	-	-	-	-	-	-	-	-	-	-	-	-	38.77	6.55	6.59
	JS-NGO-01s	NGO-HM5	125-250	98	170	230	40	195500	yes	-	-	-	-	yes	-	-	-	-	-	-	-	-	-	-	-	-	-	-	-	-	-	-	-	-	-	-	-	-	-	-	-	-	-	-	-	-	39.61	11.83	1.2228
	JS-NGO-01s	NGO-HM5	125-250	99	160	170	40	136000	-	-	-	-	-	-	-	-	-	-	-	-	-	-	-	-	-	-	-	-	-	-	-	-	-	-	-	-	-	-	-	-	-	-	yes	-	-	-	38.82	9.25	2.24
	JS-NGO-01s	NGO-HM5	125-250	100	200	210	40	210000	yes	-	-	-	-	-	-	-	-	-	-	-	-	-	-	-	-	-	-	-	-	-	-	-	-	-	-	-	-	-	-	-	-	-	yes	-	-	-	38.71	8.41	0.9193
	JS-NGO-01s	NGO-HM5	125-250	101	80	90	40	36000	-	-	-	yes	-	-	-	-	-	-	-	-	-	-	-	-	-	-	-	-	yes	-	-	-	-	-	-	-	-	-	yes	-	-	-	-	-	-	-	38.14	2.71	12.15
	JS-NGO-01s	NGO-HM5	125-250	102	190	190	40	180500	-	-	-	-	-	-	-	-	-	-	-	-	-	yes	-	-	-	-	-	-	-	-	-	-	-	-	-	-	-	-	-	-	-	-	-	-	-	-	39.04	9.02	1.67
	JS-NGO-01s	NGO-HM5	125-250	103	90	100	40	45000	yes	-	-	-	-	-	-	-	-	-	-	-	-	-	-	-	-	-	-	-	-	-	-	-	-	-	-	-	-	-	-	-	-	-	-	-	-	-	38.09	3.89	7.04
	JS-NGO-01s	JS-NGO-1s_250-500_1st	250-500	1	190	180	40	171000	-	-	-	-	-	-	-	-	-	-	-	-	-	-	-	-	-	-	-	-	-	-	-	-	-	-	-	-	-	-	-	-	-	-	yes	-	-	-	39.75	12.01	1.2118
	JS-NGO-01s	JS-NGO-1s_250-500_1st	250-500	2	160	120	18	43200	yes	-	-	yes	-	-	-	-	-	-	-	yes	-	-	-	-	-	-	-	-	-	-	-	-	-	-	-	-	-	-	-	-	-	-	-	-	-	-	38.81	7.42	5.74
	JS-NGO-01s	JS-NGO-1s_250-500_1st	250-500	3	300	200	40	300000	-	-	-	-	yes	-	-	yes	-	-	-	yes	-	-	-	-	-	-	-	-	-	-	-	-	-	-	-	-	-	yes	-	-	-	-	-	-	-	-	38.19	4.65	3.39
	JS-NGO-01s	JS-NGO-1s_250-500_1st	250-500	4	140	160	40	112000	yes	-	-	-	-	-	-	-	-	-	-	-	-	-	-	-	-	-	-	-	-	-	-	-	-	-	-	-	-	-	-	-	-	-	-	-	-	-	38.99	9.79	1.115
	JS-NGO-01s	JS-NGO-1s_250-500_1st	250-500	5	190	140	40	133000	-	-	-	yes	-	-	-	-	-	-	-	-	-	-	-	-	-	-	-	-	-	-	yes	-	-	-	-	-	-	-	-	-	-	-	-	-	-	-	38.43	6.76	1.1702
	JS-NGO-01s	JS-NGO-1s_250-500_1st	250-500	6	180	400	50	450000	-	-	-	-	-	-	-	-	-	-	-	-	-	-	-	-	-	-	-	-	-	-	-	-	-	-	yes	-	-	-	-	-	-	-	-	-	-	-	38.2	6.42	1.1274
	JS-NGO-01s	JS-NGO-1s_250-500_1st	250-500	7	220	240	40	264000	-	-	-	yes	-	-	-	-	-	-	-	yes	-	-	-	yes	-	-	-	-	-	-	-	-	-	-	-	-	-	yes	-	-	-	-	-	-	-	-	39.72	10.47	1.0605
	JS-NGO-01s	JS-NGO-1s_250-500_1st	250-500	8	160	280	40	224000	-	-	-	-	-	yes	-	-	-	-	-	-	-	-	-	-	-	-	-	-	-	-	yes	-	-	-	-	-	-	-	-	-	-	-	-	-	-	-	38.82	7.79	0.9212
	JS-NGO-01s	JS-NGO-1s_250-500_1st	250-500	9	300	280	40	420000	yes	-	-	-	-	yes	-	-	-	-	-	-	-	-	-	-	-	yes	-	-	-	-	-	-	-	-	-	-	-	-	-	-	-	-	-	-	-	-	39.09	8.7	1.1063
	JS-NGO-01s	JS-NGO-1s_250-500_1st	250-500	10	280	200	40	280000	yes	-	-	yes	-	-	-	-	-	-	-	-	-	-	-	-	-	-	-	-	-	-	-	-	-	-	-	-	-	-	-	-	-	-	-	yes	-	-	39.85	11.74	1.1113
	JS-NGO-01s	JS-NGO-1s_250-500_1st	250-500	11	280	300	40	420000	-	-	-	-	-	-	-	-	-	-	-	-	-	-	-	-	-	-	-	-	-	-	-	-	-	-	yes	yes	-	-	-	-	-	-	-	-	-	-	38.96	8.43	1.0094
	JS-NGO-01s	JS-NGO-1s_250-500_1st	250-500	12	110	170	80	187000	-	-	-	-	-	-	-	-	-	-	-	-	-	-	-	-	-	-	-	-	-	-	yes	-	-	-	-	-	-	-	-	-	-	-	-	-	-	-	38.44	6.93	1.2835
	JS-NGO-01s	JS-NGO-1s_250-500_1st	250-500	13	140	180	16	50400	-	-	-	-	-	-	-	-	-	-	-	-	-	yes	-	-	-	-	-	-	-	-	yes	-	-	-	-	-	-	-	-	-	-	-	-	-	-	-	38.34	6.92	0.9221
	JS-NGO-01s	JS-NGO-1s_250-500_1st	250-500	14	180	140	60	189000	-	-	-	-	-	-	-	-	-	-	-	-	-	-	-	-	-	-	-	-	-	-	yes	-	-	-	-	-	-	-	-	-	-	-	-	-	-	-	38.45	7.29	1.0248
	JS-NGO-01s	JS-NGO-1s_250-500_1st	250-500	15	440	420	40	924000	-	-	-	-	-	-	-	-	-	-	-	-	-	yes	-	-	-	-	-	-	-	-	yes	-	-	-	-	-	-	-	-	-	-	-	-	-	-	-	39.37	9.84	1.1778
	JS-NGO-01s	JS-NGO-1s_250-500_1st	250-500	16	240	210	40	252000	-	-	-	-	-	yes	-	-	-	-	-	-	-	-	-	-	-	-	-	-	-	-	-	-	-	-	yes	-	-	-	-	-	-	-	-	-	-	-	37.82	5.16	1.97
	JS-NGO-01s	JS-NGO-1s_250-500_1st	250-500	17	370	320	40	592000	-	-	-	-	-	-	-	-	-	-	-	-	-	-	-	-	yes	-	-	-	-	-	yes	-	-	-	-	-	-	-	-	-	-	-	-	-	-	-	38.62	8.35	0.9295
	JS-NGO-01s	JS-NGO-1s_250-500_1st	250-500	18	210	150	20	78750	-	-	-	-	-	-	-	-	-	-	-	yes	-	-	-	-	-	-	-	-	-	-	-	-	-	-	-	-	-	-	-	-	-	-	-	-	-	-	38.73	6.97	2.02
	JS-NGO-01s	JS-NGO-1s_250-500_1st	250-500	19	340	600	60	1530000	yes	-	-	yes	-	yes	-	-	-	-	-	-	-	-	-	-	-	-	-	-	-	-	-	-	-	-	-	-	-	-	-	-	-	-	yes	-	-	-	38.69	7.92	0.9667
	JS-NGO-01s	JS-NGO-1s_250-500_1st	250-500	20	200	100	40	100000	-	-	-	-	-	-	-	-	-	-	-	-	-	-	-	-	-	-	-	-	-	-	yes	-	-	-	-	-	-	-	-	-	-	-	-	-	-	-	39.27	10.17	1.0781
	JS-NGO-01s	JS-NGO-1s_250-500_1st	250-500	21	500	390	40	975000	yes	-	-	-	-	-	-	-	-	-	-	yes	-	-	-	-	-	-	-	-	-	-	yes	-	-	-	-	-	-	yes	-	-	-	-	-	-	-	-	38.76	7.98	1.2233
	JS-NGO-01s	JS-NGO-1s_250-500_1st	250-500	22	250	380	40	475000	yes	-	-	yes	-	-	-	-	-	-	-	yes	-	-	-	-	-	-	-	-	-	-	-	-	-	-	-	-	-	-	yes	-	-	-	-	-	-	-	37.57	2.11	2.78
	JS-NGO-01s	JS-NGO-1s_250-500_1st	250-500	23	320	400	40	640000	yes	-	-	-	-	-	-	-	-	-	-	-	-	-	-	-	-	-	-	-	-	-	-	-	-	-	yes	-	-	yes	-	-	-	-	-	-	-	-	38.17	5.89	1.49
	JS-NGO-01s	JS-NGO-1s_250-500_1st	250-500	24	280	310	40	434000	-	-	-	yes	-	yes	-	-	-	-	-	-	-	-	-	-	-	-	-	-	-	-	yes	-	-	-	-	-	-	-	-	-	-	-	-	-	-	-	39.04	8.73	1.0958
	JS-NGO-01s	JS-NGO-1s_250-500_1st	250-500	25	350	480	40	840000	-	-	-	yes	-	-	-	-	-	-	-	-	-	-	-	-	-	-	-	-	-	-	yes	-	-	-	-	-	-	-	-	-	-	-	-	-	-	-	39	8.88	0.9425
	JS-NGO-01s	JS-NGO-1s_250-500_1st	250-500	26	200	200	40	200000	-	-	-	-	-	-	-	-	-	-	-	-	-	-	-	-	-	-	-	-	-	-	yes	-	-	-	-	-	-	-	-	-	-	-	-	-	-	-	38.6	8.29	0.5925
	JS-NGO-01s	JS-NGO-1s_250-500_1st	250-500	27	260	190	40	247000	-	-	-	-	-	-	-	-	-	-	-	-	-	-	-	-	-	-	-	-	-	-	yes	-	-	-	-	-	-	-	-	-	-	-	-	-	-	-	38.53	7.06	0.8722
	JS-NGO-01s	JS-NGO-1s_250-500_1st	250-500	28	440	370	40	814000	-	-	-	-	-	-	-	-	-	-	-	-	-	-	-	-	-	-	-	-	-	-	-	-	-	-	yes	-	-	-	-	-	-	-	-	-	-	-	38.46	6.47	1.3628
	JS-NGO-01s	JS-NGO-1s_250-500_1st	250-500	29	180	350	40	315000	-	-	-	-	-	-	-	-	-	-	-	-	-	yes	-	-	-	-	-	-	-	-	-	-	-	-	-	-	-	-	-	-	-	-	-	-	-	-	38.86	8.45	1.1383
	JS-NGO-01s	JS-NGO-1s_250-500_1st	250-500	30	190	280	40	266000	yes	-	-	-	-	-	-	-	-	-	-	-	-	-	-	-	-	-	-	-	-	-	-	-	-	-	yes	-	-	-	-	-	-	-	-	-	-	-	37.44	3.33	1.65
	JS-NGO-01s	JS-NGO-1s_250-500_1st	250-500	32	320	240	40	384000	-	-	-	-	-	-	-	-	-	-	-	-	-	-	-	-	-	-	-	-	-	-	yes	-	-	-	yes	-	-	-	-	-	-	-	-	-	-	-	38.55	6.58	0.8862
	JS-NGO-01s	JS-NGO-1s_250-500_1st	250-500	33	230	300	40	345000	yes	-	-	-	-	-	-	-	-	-	-	-	-	-	-	-	-	-	-	-	-	-	-	-	-	-	-	-	-	-	-	-	-	-	-	-	-	-	37.91	5.65	1.0194
	JS-NGO-01s	JS-NGO-1s_250-500_1st	250-500	34	150	160	40	120000	yes	-	-	-	-	-	-	-	-	-	-	-	-	-	-	-	-	-	-	-	-	-	-	-	-	-	-	-	-	-	-	-	-	-	-	-	-	-	39.67	11.23	1.1429
	JS-NGO-01s	JS-NGO-1s_250-500_1st	250-500	35	300	240	40	360000	yes	-	-	-	-	-	-	-	-	-	-	-	-	-	-	-	-	-	-	-	-	-	-	-	-	-	-	-	-	-	-	-	-	-	-	-	-	-	37.32	3.74	2.19
	JS-NGO-01s	JS-NGO-1s_250-500_1st	250-500	36	140	180	40	126000	-	-	-	-	-	-	-	-	-	-	-	-	-	-	-	-	-	-	-	-	-	-	yes	-	-	-	-	-	-	-	-	-	-	-	-	-	-	-	39.22	10.18	1.0814
	JS-NGO-01s	JS-NGO-1s_250-500_1st	250-500	37	200	130	40	130000	-	-	-	-	-	-	-	-	-	-	-	-	-	-	-	-	-	-	-	-	-	-	-	-	-	-	yes	-	-	-	-	-	-	-	-	-	-	-	38.33	6.31	1.2434
	JS-NGO-01s	JS-NGO-1s_250-500_1st	250-500	38	220	130	40	143000	-	-	-	-	-	-	-	-	-	-	-	-	-	-	-	-	-	-	-	-	-	-	yes	-	-	-	-	-	-	-	-	-	-	-	-	-	-	-	39.27	9.8	0.9759
	JS-NGO-01s	JS-NGO-1s_250-500_1st	250-500	39	220	130	40	143000	yes	-	-	-	-	-	-	-	-	-	-	-	-	-	-	-	-	-	-	-	-	-	-	-	-	-	-	-	-	-	-	-	-	-	-	-	-	-	38.81	7.93	0.9232
	JS-NGO-01s	JS-NGO-1s_250-500_1st	250-500	40	350	350	40	612500	-	-	-	-	-	-	-	-	-	-	-	-	-	-	-	-	-	-	-	-	-	-	-	-	-	-	yes	-	-	-	-	-	-	-	-	-	-	-	38.02	6.18	1.234
	JS-NGO-01s	JS-NGO-1s_250-500_1st	250-500	41	210	160	40	168000	-	-	-	-	-	-	-	-	-	-	-	-	-	-	-	-	-	-	-	-	-	-	-	-	-	-	-	-	-	-	-	-	-	-	-	yes	-	-	38.51	6.35	2.66
	JS-NGO-01s	JS-NGO-1s_250-500_1st	250-500	42	280	430	40	602000	-	-	-	-	-	-	-	-	-	-	-	yes	-	-	-	-	-	-	-	-	-	-	-	-	-	-	-	-	-	-	yes	-	-	-	-	-	-	-	39.2	10.1	1.92
	JS-NGO-01s	JS-NGO-1s_250-500_1st	250-500	43	320	390	40	624000	-	-	-	-	-	-	-	-	-	-	-	-	-	-	-	-	-	-	-	-	-	-	yes	-	-	-	-	-	-	-	-	-	-	-	-	-	-	-	38.96	8.84	1.1959
	JS-NGO-01s	JS-NGO-1s_250-500_1st	250-500	44	180	220	40	198000	yes	-	-	-	-	-	-	-	-	-	-	-	-	-	-	-	-	-	-	-	-	-	-	-	-	-	-	-	-	-	-	-	-	-	-	-	-	-	39.02	8.65	1.341
	JS-NGO-01s	JS-NGO-1s_250-500_1st	250-500	45	220	180	40	198000	-	-	-	-	-	-	-	-	-	-	-	-	-	-	-	-	-	-	-	-	-	-	yes	-	-	-	-	-	-	-	-	-	-	-	-	-	-	-	40.11	12.03	1.0361
	JS-NGO-01s	JS-NGO-1s_250-500_1st	250-500	46	140	200	20	70000	yes	-	-	-	-	-	-	-	-	-	-	-	-	-	-	-	-	-	-	-	-	-	-	-	-	-	-	-	-	-	-	-	-	-	-	-	-	-	38.55	5.17	6.73
	JS-NGO-01s	JS-NGO-1s_250-500_1st	250-500	47	170	300	40	255000	-	-	-	-	-	-	-	-	-	-	-	-	-	-	-	-	-	-	-	-	-	-	yes	-	-	-	-	-	-	-	-	-	-	-	-	-	-	-	39.17	9.89	0.9338
	JS-NGO-01s	JS-NGO-1s_250-500_1st	250-500	48	160	70	40	56000	-	-	-	-	-	-	-	-	-	-	-	-	-	-	-	-	-	-	-	-	-	-	-	-	-	-	yes	-	-	-	-	-	-	-	-	-	-	-	39.19	9.69	1.0472
	JS-NGO-01s	JS-NGO-1s_250-500_1st	250-500	49	260	180	40	234000	-	-	-	-	-	-	-	-	-	-	-	-	-	-	-	-	-	-	-	-	-	-	-	-	-	-	-	-	-	yes	-	-	-	-	-	-	-	-	37.55	1.6543	7.55
	JS-NGO-01s	JS-NGO-1s_250-500_1st	250-500	50	150	180	40	135000	yes	-	-	-	yes	-	-	-	-	-	-	yes	-	-	-	-	-	-	-	-	-	-	-	-	-	-	-	-	-	-	-	-	-	-	-	-	-	-	39.34	10.25	0.9118
	JS-NGO-01s	JS-NGO-1s_250-500_1st	250-500	51	290	210	40	304500	yes	-	-	-	-	-	-	-	-	-	-	-	-	-	-	-	-	-	-	-	-	-	-	-	-	-	yes	-	-	-	-	-	-	-	-	-	-	-	39.03	9.91	0.86
	JS-NGO-01s	JS-NGO-1s_250-500_1st	250-500	52	190	140	30	99750	-	-	-	-	-	-	-	-	-	-	-	-	-	-	-	-	-	-	-	-	-	-	-	-	-	-	-	-	-	-	-	-	-	-	-	yes	-	-	38.56	4.71	7.68
	JS-NGO-01s	JS-NGO-1s_250-500_1st	250-500	53	170	150	40	127500	-	-	-	-	-	-	-	-	-	-	-	-	-	-	-	yes	-	-	-	-	-	-	-	-	-	-	-	-	-	-	-	-	-	-	-	-	-	-	38.06	5.46	1.49
	JS-NGO-01s	JS-NGO-1s_250-500_1st	250-500	54	200	180	40	180000	-	-	-	-	-	-	-	-	-	-	-	-	-	-	-	-	-	-	-	-	-	-	yes	-	-	-	-	-	-	-	-	-	-	-	-	-	-	-	38.74	8.37	1.1481
	JS-NGO-01s	JS-NGO-1s_250-500_1st	250-500	55	370	410	40	758500	yes	-	-	yes	-	-	-	-	-	-	-	-	-	-	-	-	-	-	yes	-	-	-	-	-	-	-	-	-	-	-	yes	-	-	-	-	-	-	-	38.36	6.66	2.71
	JS-NGO-01s	JS-NGO-1s_250-500_1st	250-500	56	180	300	40	270000	yes	-	-	-	-	-	-	-	-	-	-	-	-	-	-	-	-	-	-	-	-	-	-	-	-	-	-	-	-	-	-	-	-	-	-	-	-	-	38.44	7.25	1.2789
	JS-NGO-01s	JS-NGO-1s_250-500_1st	250-500	57	180	230	40	207000	-	-	-	-	-	-	-	-	-	-	-	-	-	-	-	-	-	-	-	-	-	-	yes	-	-	-	-	-	-	-	-	-	-	-	-	-	-	-	39.18	9.51	1.1159
	JS-NGO-01s	JS-NGO-1s_250-500_1st	250-500	58	270	700	40	945000	-	-	-	-	-	-	-	-	-	-	-	-	-	-	-	-	-	-	-	-	-	-	yes	-	-	-	-	-	-	-	-	-	-	-	-	-	-	-	39.5	10.15	1.2098
	JS-NGO-01s	JS-NGO-1s_250-500_1st	250-500	59	260	290	40	377000	-	-	-	-	-	-	-	-	-	-	-	-	-	-	-	-	-	-	-	-	-	-	-	-	-	-	yes	-	-	-	-	-	-	-	-	-	-	-	38.79	7.77	1.92
	JS-NGO-01s	JS-NGO-1s_250-500_1st	250-500	60	280	280	40	392000	yes	-	-	yes	-	-	-	-	-	-	-	-	-	-	-	-	-	-	-	-	-	-	-	-	-	-	-	-	-	-	-	-	-	-	-	-	-	-	38.37	7.53	1.0267
	JS-NGO-01s	JS-NGO-1s_250-500_1st	250-500	61	210	160	40	168000	yes	-	-	-	yes	-	-	-	-	-	-	-	yes	-	-	-	-	-	-	-	-	-	-	-	-	-	-	-	-	-	-	-	-	-	-	-	-	-	39.76	11.7	1.1977
	JS-NGO-01s	JS-NGO-1s_250-500_1st	250-500	62	320	110	40	176000	-	-	-	-	-	-	-	-	-	-	-	-	-	-	-	-	-	-	-	-	-	-	yes	-	-	-	-	-	-	-	-	-	-	-	-	-	-	-	38.37	7.49	1.0699
	JS-NGO-01s	JS-NGO-1s_250-500_1st	250-500	63	530	680	40	1802000	yes	-	-	yes	yes	-	-	-	-	-	-	-	-	-	-	-	-	-	-	-	-	-	-	-	-	-	-	-	-	-	yes	-	-	-	-	-	-	-	39.11	10.26	1.5
	JS-NGO-01s	JS-NGO-1s_250-500_1st	250-500	64	310	180	40	279000	yes	-	-	-	-	-	-	-	-	-	-	-	-	-	-	-	-	-	-	-	-	-	-	-	-	-	-	-	-	-	yes	-	-	-	-	-	-	-	37.69	1.98	7.1
	JS-NGO-01s	JS-NGO-1s_250-500_1st	250-500	65	280	280	40	392000	-	-	-	yes	-	-	-	-	-	-	-	-	-	-	-	-	-	-	-	-	-	-	-	-	-	-	-	-	-	-	-	-	-	-	-	-	-	-	39.42	10.6	1.99
	JS-NGO-01s	JS-NGO-1s_250-500_1st	250-500	66	180	190	40	171000	-	-	-	-	-	-	-	-	-	-	-	yes	-	-	-	-	-	-	-	-	-	-	-	-	-	-	-	-	-	yes	-	-	-	-	-	-	-	-	38.73	7.54	1.1626
	JS-NGO-01s	JS-NGO-1s_250-500_1st	250-500	67	310	190	40	294500	-	-	-	-	-	-	-	-	-	-	-	yes	-	-	-	-	-	-	-	-	-	-	-	-	-	-	-	-	-	-	-	-	-	-	-	-	-	-	38.71	8.07	1.1004
	JS-NGO-01s	JS-NGO-1s_250-500_1st	250-500	68	200	150	40	150000	yes	-	-	-	-	-	-	-	-	-	-	-	-	-	-	-	-	-	-	-	-	-	-	-	-	-	-	-	-	-	-	-	-	-	-	-	-	-	38.34	6.36	1.99
	JS-NGO-01s	JS-NGO-1s_250-500_1st	250-500	69	220	150	40	165000	-	-	-	-	-	-	-	-	-	-	-	yes	-	-	-	-	-	-	-	-	-	-	-	-	-	-	-	-	-	yes	-	-	-	-	-	-	-	-	38.02	5.04	1.6
	JS-NGO-01s	JS-NGO-1s_250-500_1st	250-500	70	180	190	40	171000	yes	-	-	-	-	-	-	-	-	-	-	-	-	-	-	-	-	-	-	-	-	-	yes	-	-	-	-	-	-	-	-	-	-	-	-	-	-	-	38.74	8.82	0.7443
	JS-NGO-01s	JS-NGO-1s_250-500_1st	250-500	71	290	220	40	319000	-	-	-	-	-	-	-	-	-	-	-	-	-	-	-	-	-	yes	-	-	-	-	-	-	-	-	-	-	-	-	-	-	-	-	-	-	-	-	38.64	7.34	2.3
	JS-NGO-01s	JS-NGO-1s_250-500_1st	250-500	72	210	140	40	147000	yes	-	-	-	-	-	-	-	-	-	-	-	-	-	-	-	-	-	-	-	-	-	-	-	-	-	-	-	-	-	-	-	-	-	-	yes	-	-	38.19	5.13	2.95
	JS-NGO-01s	JS-NGO-1s_250-500_1st	250-500	73	170	150	40	127500	-	-	-	-	-	-	-	-	yes	-	-	-	-	-	-	-	-	-	-	-	-	-	-	-	-	-	-	-	-	-	-	-	-	-	-	-	-	-	38.16	6.06	1.3644
	JS-NGO-01s	JS-NGO-1s_250-500_1st	250-500	74	140	150	40	105000	-	-	-	-	-	-	-	-	-	-	-	-	-	-	-	-	-	-	-	-	-	-	-	-	-	-	-	-	-	yes	-	-	-	-	-	-	yes	carbonate + CO2	38.52	4.69	6.73
	JS-NGO-01s	JS-NGO-1s_250-500_2nd	250-500	75	250	420	40	525000	-	-	-	yes	-	-	-	-	-	-	-	-	-	-	-	-	-	-	-	-	-	-	yes	-	-	-	-	-	-	-	-	-	-	-	-	-	-	-	38.99	8.95	0.8824
	JS-NGO-01s	JS-NGO-1s_250-500_2nd	250-500	76	300	140	40	210000	-	-	-	-	-	-	-	-	-	-	-	-	-	-	-	-	-	-	-	-	-	-	yes	-	-	-	-	-	-	-	-	-	-	-	-	-	-	-	38.63	7.06	0.8204
	JS-NGO-01s	JS-NGO-1s_250-500_2nd	250-500	77	160	380	40	304000	-	-	-	-	-	-	-	-	-	-	-	-	-	-	-	-	-	-	-	-	-	-	yes	-	-	-	-	-	-	yes	-	-	-	yes	-	-	-	-	39.07	8.8	1.3099
	JS-NGO-01s	JS-NGO-1s_250-500_2nd	250-500	78	360	320	40	576000	yes	-	-	yes	yes	-	-	-	-	-	-	yes	-	yes	-	yes	-	-	-	-	-	-	yes	-	-	-	-	-	-	-	-	-	-	-	-	-	-	-	38.08	5.72	1.1216
	JS-NGO-01s	JS-NGO-1s_250-500_2nd	250-500	79	260	260	40	338000	-	-	-	-	-	-	-	-	-	-	-	-	-	-	-	-	-	-	-	-	-	-	yes	-	-	-	-	-	-	-	-	-	-	-	-	-	-	-	38.75	8.63	0.6191
	JS-NGO-01s	JS-NGO-1s_250-500_2nd	250-500	81	150	160	40	120000	yes	-	-	-	-	-	-	-	-	-	-	-	-	-	-	-	-	-	-	-	-	-	-	-	-	-	-	-	-	-	-	-	-	-	-	-	-	-	38.86	8.52	1.0374
	JS-NGO-01s	JS-NGO-1s_250-500_2nd	250-500	82	330	300	40	495000	-	-	-	-	-	-	-	-	-	-	-	-	-	-	-	-	-	-	-	-	-	-	yes	-	-	-	yes	-	-	-	-	-	-	-	-	-	-	-	38.74	7.67	0.9865
	JS-NGO-01s	JS-NGO-1s_250-500_2nd	250-500	83	220	200	40	220000	-	-	-	-	-	-	-	-	-	-	-	-	-	-	-	-	-	-	-	-	-	-	yes	-	-	-	-	-	-	-	-	-	-	-	-	-	-	-	38.44	6.48	1.2232
	JS-NGO-01s	JS-NGO-1s_250-500_2nd	250-500	84	240	380	40	456000	-	-	-	-	-	-	-	-	-	-	-	-	-	-	-	-	-	-	-	-	-	-	yes	-	-	-	-	-	-	-	-	-	-	-	-	-	-	-	38.82	8.65	1.3257
	JS-NGO-01s	JS-NGO-1s_250-500_2nd	250-500	85	440	240	40	528000	yes	-	-	yes	-	-	-	-	-	-	-	-	-	-	-	-	-	-	-	-	-	-	-	-	-	-	-	-	-	-	-	-	-	-	-	-	-	-	38.79	8.76	0.9352
	JS-NGO-01s	JS-NGO-1s_250-500_2nd	250-500	86	230	290	40	333500	-	-	-	yes	-	-	-	-	-	-	-	yes	-	-	-	-	-	-	-	-	-	-	-	-	-	-	-	-	-	yes	-	-	-	-	-	-	-	-	38.1	5.81	1.2346
	JS-NGO-01s	JS-NGO-1s_250-500_2nd	250-500	87	180	450	40	405000	-	-	-	-	-	-	-	-	-	-	-	-	-	-	-	-	-	-	-	-	-	-	yes	-	-	-	-	-	-	-	-	-	-	-	-	-	-	-	38.76	8.62	1.2057
	JS-NGO-01s	JS-NGO-1s_250-500_2nd	250-500	88	170	150	40	127500	-	-	-	-	-	-	-	-	-	-	-	yes	-	-	-	-	-	-	-	-	-	-	-	-	-	-	-	-	-	yes	-	-	-	-	yes	-	-	-	40.34	13.43	1.0734
	JS-NGO-01s	JS-NGO-1s_250-500_2nd	250-500	89	360	300	40	540000	-	-	-	yes	-	-	-	-	-	-	-	-	-	-	-	-	-	-	-	-	-	-	-	-	-	-	-	-	-	-	-	-	-	-	-	-	-	-	39.57	10.7	1.0078
	JS-NGO-01s	JS-NGO-1s_250-500_2nd	250-500	90	120	200	40	120000	-	-	-	-	-	-	-	-	-	-	-	-	-	-	-	-	-	-	-	-	-	-	yes	-	-	-	-	-	-	-	-	-	-	-	-	-	-	-	39.05	9.13	0.9098
	JS-NGO-01s	JS-NGO-1s_250-500_2nd	250-500	91	140	180	40	126000	yes	-	-	-	-	-	-	-	-	-	-	yes	-	-	-	-	-	-	-	-	-	-	-	-	-	-	-	-	-	-	-	-	-	-	-	-	-	-	38.63	6.73	0.9448
	JS-NGO-01s	JS-NGO-1s_250-500_2nd	250-500	92	380	240	40	456000	yes	-	-	-	-	-	-	-	-	-	-	-	-	-	-	-	-	-	-	-	-	-	-	-	-	-	-	-	-	-	-	-	-	-	-	-	-	-	38.29	4.07	7
	JS-NGO-01s	JS-NGO-1s_250-500_2nd	250-500	93	130	190	40	123500	-	-	-	-	-	-	-	-	-	-	-	-	-	-	-	-	-	-	-	-	-	-	yes	-	-	-	-	-	-	-	-	-	-	-	-	-	-	-	38.67	7.68	1.0602
	JS-NGO-01s	JS-NGO-1s_250-500_2nd	250-500	94	320	450	40	720000	-	-	-	-	-	-	-	-	-	-	-	yes	-	-	-	-	-	-	-	-	-	-	-	-	-	-	-	-	-	yes	-	-	-	-	-	-	-	-	38.29	3.61	6.67
	JS-NGO-01s	JS-NGO-1s_250-500_2nd	250-500	95	230	120	40	138000	yes	-	-	-	-	-	-	-	-	-	-	-	-	-	-	-	-	-	-	-	-	-	-	-	-	-	-	-	-	yes	-	-	-	-	-	-	-	-	38.16	3.57	5.73
	JS-NGO-01s	JS-NGO-1s_250-500_2nd	250-500	96	330	350	34	490875	yes	-	-	-	-	-	-	-	-	-	-	-	-	-	-	-	-	-	-	-	-	-	-	-	-	-	yes	-	-	-	-	-	-	-	-	-	-	-	38.86	8.45	1.0595
	JS-NGO-01s	JS-NGO-1s_250-500_2nd	250-500	97	190	190	40	180500	yes	-	-	-	-	-	-	-	-	-	-	-	-	yes	-	-	-	-	yes	-	-	-	-	-	-	-	-	-	-	yes	-	-	-	-	-	-	-	-	37.12	1.2316	1.54
	JS-NGO-01s	JS-NGO-1s_250-500_2nd	250-500	98	260	440	40	572000	yes	-	-	yes	-	-	-	-	-	yes	-	yes	-	-	-	yes	-	-	-	-	-	-	-	-	-	-	-	-	-	yes	-	yes	-	-	-	-	-	melt inclusions	38.77	7.79	1.68
	JS-NGO-01s	JS-NGO-1s_250-500_2nd	250-500	99	340	160	40	272000	-	-	-	yes	-	-	-	-	-	-	-	yes	yes	-	-	-	-	-	-	-	-	-	-	-	-	-	-	-	-	yes	-	-	-	-	-	-	-	-	38.9	9.81	0.9803
	JS-NGO-01s	JS-NGO-1s_250-500_2nd	250-500	100	350	400	40	700000	yes	-	-	-	-	-	-	yes	-	-	-	-	-	-	-	-	-	-	-	-	-	-	-	-	-	-	-	-	-	-	-	-	-	-	-	-	-	quartz + alkali feldspar	39.61	11.02	1.0768
	JS-NGO-01s	JS-NGO-1s_250-500_2nd	250-500	101	0	0	0	0	yes	-	-	-	-	-	-	-	-	-	-	-	-	-	-	-	-	-	-	-	-	-	yes	-	-	-	-	-	-	-	-	-	-	-	-	-	-	manually analyzed	37.96	6.22	1.0661
	JS-NGO-01s	JS-NGO-1s_250-500_2nd	250-500	102	0	0	0	0	-	-	-	-	-	-	-	-	-	-	-	-	-	-	-	-	-	-	-	-	-	-	-	yes	-	-	-	-	-	-	-	-	-	-	-	-	-	manually analyzed	38.7	7.93	0.9988
	JS-NGO-03s	NGO-HM1	63-125	1	140	130	40	91000	-	-	-	-	-	-	-	-	-	-	-	yes	-	-	-	-	-	-	-	-	-	-	-	-	-	-	-	-	-	-	-	-	-	-	-	-	-	-	38.54	8.12	1.77
	JS-NGO-03s	NGO-HM1	63-125	2	70	100	16	14000	yes	-	-	-	-	-	-	-	-	-	-	-	-	-	-	-	-	-	-	-	-	-	-	-	-	-	-	-	-	-	-	-	-	-	-	-	-	-	38.08	3.68	8.51
	JS-NGO-03s	NGO-HM1	63-125	3	130	140	26	59150	-	-	-	yes	-	-	-	-	-	-	-	-	-	-	-	-	-	-	-	-	-	-	-	-	-	-	-	-	-	-	-	-	-	-	-	-	-	-	38.6	9.02	1.127
	JS-NGO-03s	NGO-HM1	63-125	4	100	80	24	24000	yes	-	-	-	-	-	-	-	-	-	-	-	-	-	-	-	-	-	-	-	-	-	-	-	-	-	-	-	-	-	-	-	-	-	-	-	-	-	38.22	7.57	1.1132
	JS-NGO-03s	NGO-HM1	63-125	5	50	80	20	10000	yes	-	-	-	-	-	-	-	-	-	-	-	-	-	-	-	-	-	-	-	-	-	-	-	-	-	-	-	-	-	-	-	-	-	-	-	-	-	38.51	5.15	9.34
	JS-NGO-03s	NGO-HM1	63-125	6	90	70	16	12600	-	-	-	-	-	-	-	-	-	-	-	-	-	-	-	-	-	-	-	-	-	-	-	-	-	-	-	-	-	yes	-	-	-	-	-	-	-	-	38.18	6.91	1.2769
	JS-NGO-03s	NGO-HM1	63-125	7	100	90	40	45000	yes	-	-	-	-	-	-	-	-	-	-	-	-	yes	-	-	-	-	-	-	-	-	-	-	-	-	-	-	-	-	-	-	-	-	-	yes	yes	CO2
	JS-NGO-03s	NGO-HM1	63-125	8	110	160	24	52800	yes	-	-	-	-	-	-	-	-	-	-	-	-	-	-	-	-	-	-	-	-	-	-	-	-	-	-	-	-	-	-	-	-	-	-	-	-	-	38.25	7.85	1.372
	JS-NGO-03s	NGO-HM1	63-125	9	70	60	16	8400	yes	-	-	-	-	-	-	-	-	-	-	-	-	-	-	-	-	-	-	-	-	-	-	-	-	-	-	-	-	-	-	-	-	-	-	-	-	-	38.84	9.98	1.0427
	JS-NGO-03s	NGO-HM1	63-125	10	90	80	28	25200	yes	-	-	-	-	-	-	-	-	-	-	yes	-	-	-	-	-	-	-	-	-	-	-	-	-	-	-	-	-	yes	-	-	-	-	-	-	yes	carbonate + graphite	37.95	4.92	2.95
	JS-NGO-03s	NGO-HM1	63-125	11	150	130	18	43875	yes	-	-	-	-	-	-	-	-	-	-	-	-	-	-	-	-	-	-	-	-	-	-	-	-	-	-	-	-	-	-	-	-	-	-	-	-	-	37.63	4.61	3.17
	JS-NGO-03s	NGO-HM1	63-125	12	90	90	30	30375	yes	-	-	-	-	-	-	-	-	-	-	yes	-	-	-	-	-	-	-	-	-	-	-	-	-	-	-	-	-	-	-	-	-	-	-	-	-	-	38.34	4.72	7.06
	JS-NGO-03s	NGO-HM1	63-125	13	120	90	10	13500	yes	-	-	-	-	-	-	-	-	-	-	-	-	-	-	-	-	-	-	-	-	-	-	-	-	-	-	-	-	-	-	-	-	-	-	-	-	-	38.08	7.96	1.79
	JS-NGO-03s	NGO-HM1	63-125	14	100	100	16	20000	yes	-	-	-	-	-	-	-	-	-	-	-	-	-	-	-	-	-	-	-	-	-	-	-	-	-	-	-	-	-	-	-	-	-	-	-	-	-	37.71	5.85	2.08
	JS-NGO-03s	NGO-HM1	63-125	15	70	70	28	17150	yes	-	-	-	-	-	-	-	-	-	-	-	-	-	-	-	-	-	-	-	-	-	-	-	-	-	-	-	-	-	-	-	-	-	-	-	-	-	37.88	6.28	2.67
	JS-NGO-03s	NGO-HM1	63-125	16	150	120	22	49500	-	-	-	-	-	-	-	-	-	-	-	-	-	-	-	-	-	-	-	-	-	-	-	-	-	-	yes	-	-	-	-	-	-	-	-	-	-	-	37.41	4.18	1.59
	JS-NGO-03s	NGO-HM1	63-125	17	90	90	18	18225	-	-	-	-	-	-	-	-	-	-	-	yes	-	-	-	-	-	-	-	-	-	-	-	-	-	-	-	-	-	yes	-	-	-	-	-	-	-	-	37.34	2.48	8.06
	JS-NGO-03s	NGO-HM1	63-125	18	100	60	20	15000	-	-	-	-	-	-	-	-	-	-	-	-	-	-	-	-	-	-	-	-	-	-	yes	-	-	-	-	-	-	-	-	-	-	-	-	-	-	-	38.38	8.54	0.9577
	JS-NGO-03s	NGO-HM1	63-125	19	130	100	22	35750	yes	-	-	-	-	-	-	-	-	-	-	-	-	-	-	-	-	-	-	-	-	-	-	-	-	-	-	-	-	-	-	-	-	-	-	-	-	-	37.18	4.61	1.92
	JS-NGO-03s	NGO-HM1	63-125	20	60	100	18	13500	-	-	-	-	-	-	-	-	-	-	-	-	-	-	-	-	-	-	-	-	-	-	-	-	-	-	-	-	-	-	yes	-	-	-	-	-	-	-	36.84	0.7554	8.61
	JS-NGO-03s	NGO-HM1	63-125	21	80	80	26	20800	yes	-	-	-	-	-	-	-	-	-	-	-	-	-	-	-	-	-	-	-	-	-	-	-	-	-	-	-	-	-	-	-	-	-	-	-	-	-	38.49	8	1.158
	JS-NGO-03s	NGO-HM1	63-125	22	120	110	24	39600	yes	-	-	-	-	-	-	-	-	-	-	-	-	-	-	-	yes	-	-	-	-	-	-	-	-	-	-	-	-	-	-	-	-	-	-	-	-	-	37.89	4.35	7.13
	JS-NGO-03s	NGO-HM1	63-125	23	80	90	26	23400	-	-	-	-	-	-	-	-	-	-	-	-	yes	-	-	-	-	-	-	-	-	-	yes	-	-	-	-	-	-	-	-	-	-	-	-	-	-	-	38.55	9.79	1.0871
	JS-NGO-03s	NGO-HM1	63-125	24	80	60	24	14400	-	-	-	yes	-	-	-	-	-	-	-	-	-	-	-	-	-	-	-	-	-	-	-	-	-	-	-	-	-	-	-	-	-	-	-	-	-	-	37.67	6.37	0.9112
	JS-NGO-03s	NGO-HM1	63-125	25	60	80	26	15600	yes	-	-	-	-	-	-	-	-	-	-	-	-	-	-	-	-	-	-	-	-	-	-	-	-	-	-	yes	-	-	-	-	-	-	-	-	-	-	37.56	5.26	0.9416
	JS-NGO-03s	NGO-HM1	63-125	26	80	110	18	19800	-	-	-	-	-	-	-	-	-	-	-	-	-	-	-	-	-	-	-	-	-	-	-	yes	-	-	-	-	-	-	-	-	-	-	-	-	-	-	38.47	7.89	1.1799
	JS-NGO-03s	NGO-HM1	63-125	27	110	80	40	44000	-	-	-	-	-	-	-	-	-	-	-	yes	-	-	-	-	-	-	-	-	-	-	-	-	-	-	-	yes	-	-	-	-	-	-	-	-	-	-	38.46	8.87	1.0222
	JS-NGO-03s	NGO-HM1	63-125	28	90	120	30	40500	-	-	-	yes	-	-	-	-	yes	-	-	-	-	-	-	-	-	-	-	-	-	-	-	-	-	-	-	-	-	-	yes	-	-	-	-	-	-	-	38.63	7.18	7.71
	JS-NGO-03s	NGO-HM1	63-125	29	70	70	30	18375	yes	-	-	-	-	-	-	-	-	-	-	-	-	-	-	-	-	-	-	-	-	-	-	-	-	-	-	-	-	-	-	-	-	-	-	-	-	-	38.66	6.33	7.15
	JS-NGO-03s	NGO-HM1	63-125	30	70	90	16	12600	yes	-	-	-	-	-	-	-	-	-	-	-	-	-	-	-	-	-	-	-	-	-	-	-	-	-	-	-	-	-	-	-	-	-	-	-	-	-	38.02	4.15	7.14
	JS-NGO-03s	NGO-HM1	63-125	31	60	80	18	10800	-	-	-	-	-	-	-	-	-	-	-	-	-	-	-	-	-	-	-	-	-	-	-	-	-	-	yes	-	-	-	-	-	-	-	-	-	-	-	37.96	6.26	3.3
	JS-NGO-03s	NGO-HM1	63-125	32	60	60	22	9900	-	-	-	-	-	-	-	-	-	-	-	-	-	-	-	-	-	-	-	-	-	-	-	-	-	-	yes	-	-	-	-	-	-	-	-	-	-	-	38.5	8.09	1.1723
	JS-NGO-03s	NGO-HM1	63-125	33	90	120	32	43200	-	-	-	-	-	-	-	-	-	-	-	-	-	-	-	-	-	-	-	-	-	-	-	-	-	-	-	-	-	-	-	-	-	-	yes	-	-	-	39.11	9.65	1.2027
	JS-NGO-03s	NGO-HM1	63-125	34	90	80	18	16200	-	-	-	-	-	-	-	-	-	-	-	-	-	-	-	-	-	-	-	-	-	-	yes	-	-	-	-	-	-	-	-	-	-	-	-	-	-	-	38.61	9.07	0.9381
	JS-NGO-03s	NGO-HM1	63-125	35	70	110	24	23100	-	-	-	-	-	-	-	-	-	-	-	-	-	-	-	-	-	-	-	-	-	-	yes	-	-	-	-	-	-	-	-	-	-	-	-	-	-	-	38.16	7.66	0.9609
	JS-NGO-03s	NGO-HM1	63-125	36	80	90	28	25200	-	-	-	-	-	-	-	-	-	-	-	-	-	yes	-	-	-	-	-	-	-	-	-	-	-	-	-	-	-	-	-	-	-	-	-	-	-	-	37.86	3.52	6.17
	JS-NGO-03s	NGO-HM1	63-125	37	100	60	16	12000	yes	-	-	-	-	-	-	-	-	-	-	-	-	-	-	-	-	-	-	-	-	-	-	-	-	-	-	-	-	-	-	-	-	-	-	-	-	-	37.95	3.07	5.94
	JS-NGO-03s	NGO-HM1	63-125	38	160	280	20	112000	-	-	-	-	-	-	-	-	-	-	-	-	-	-	-	yes	-	-	-	-	-	-	-	-	-	-	-	-	-	-	-	-	-	-	-	-	-	-	38.1	6.95	1.0396
	JS-NGO-03s	NGO-HM1	63-125	39	100	70	26	22750	yes	-	-	-	-	-	-	-	-	-	-	-	-	-	-	-	-	-	-	-	-	-	-	-	-	-	-	-	-	-	-	-	-	-	-	-	-	-	37.65	3.59	7.17
	JS-NGO-03s	NGO-HM1	63-125	40	80	70	16	11200	-	-	-	-	-	-	-	-	yes	-	-	-	-	yes	-	-	yes	-	-	-	-	-	-	-	-	-	-	-	-	-	-	-	-	-	-	yes	-	-	37.83	4.28	7.49
	JS-NGO-03s	NGO-HM1	63-125	41	70	90	20	15750	yes	-	-	-	-	-	-	-	-	-	-	-	-	-	-	-	-	-	-	-	-	-	-	-	-	-	-	-	-	-	-	-	-	-	-	-	-	-	37.97	6.52	1.3568
	JS-NGO-03s	NGO-HM1	63-125	42	120	110	32	52800	-	-	-	yes	-	-	-	-	-	-	-	-	-	-	-	-	-	-	-	-	-	-	-	-	-	-	-	-	-	-	-	-	-	-	-	-	-	-	37.58	5.02	2.26
	JS-NGO-03s	NGO-HM1	63-125	43	90	50	12	6750	yes	-	-	-	-	-	-	-	-	-	-	-	yes	-	-	-	-	-	-	-	-	-	-	-	-	-	-	-	-	-	-	-	-	-	-	-	-	-	37.66	6.13	1.0012
	JS-NGO-03s	NGO-HM1	63-125	44	80	90	12	10800	yes	-	-	-	-	-	-	-	-	-	-	-	-	-	-	-	-	-	-	-	-	-	-	-	-	-	-	-	-	-	-	-	-	-	-	-	-	-	38.87	9.01	2.76
	JS-NGO-03s	NGO-HM1	63-125	45	130	80	14	18200	yes	-	-	-	-	-	-	-	-	-	-	-	-	-	-	-	-	-	-	-	-	-	-	-	-	-	-	-	-	-	-	-	-	-	-	-	-	-	37.93	6.28	1.0703
	JS-NGO-03s	NGO-HM1	63-125	46	60	80	18	10800	-	-	-	-	-	-	-	-	-	-	-	-	-	-	-	-	-	-	-	-	-	-	-	-	-	-	-	-	-	-	-	-	-	-	yes	-	-	-	36.73	1.4662	3.99
	JS-NGO-03s	NGO-HM1	63-125	47	90	80	22	19800	-	-	-	-	-	-	-	-	-	-	-	-	-	-	-	-	-	-	-	-	-	-	yes	-	-	-	-	-	-	-	-	-	-	-	-	-	-	-	37.72	7.8	0.7673
	JS-NGO-03s	NGO-HM1	63-125	48	100	100	26	32500	yes	-	-	-	-	-	-	-	-	-	-	-	-	-	-	-	-	-	-	-	-	-	-	-	-	-	-	-	-	-	-	-	-	-	-	-	-	-	37.42	4.36	6.51
	JS-NGO-03s	NGO-HM1	63-125	49	120	180	20	54000	-	-	-	-	-	-	-	-	-	-	-	-	-	-	-	-	-	-	-	-	-	-	yes	-	-	-	-	-	-	-	-	-	-	-	-	-	-	-	38.03	6.99	0.9219
	JS-NGO-03s	NGO-HM1	63-125	50	80	50	12	6000	yes	-	-	-	-	-	-	-	-	-	-	-	-	-	-	-	-	-	-	-	-	-	-	-	-	-	-	-	-	-	-	-	-	-	-	-	-	-	37.96	6.84	1.366
	JS-NGO-03s	NGO-HM1	63-125	51	90	110	16	19800	yes	-	-	-	-	-	-	-	-	-	-	-	-	-	-	-	-	-	-	-	-	-	-	-	-	-	-	-	-	-	-	-	-	-	-	-	-	-	39.4	11.26	1.2154
	JS-NGO-03s	NGO-HM1	63-125	52	140	110	30	57750	yes	-	-	-	-	-	-	-	-	-	-	-	-	-	-	-	-	-	-	-	-	-	-	-	-	-	-	-	-	-	-	-	-	-	-	-	-	-	37.53	3.35	6.95
	JS-NGO-03s	NGO-HM1	63-125	53	80	70	8	5600	-	-	-	-	-	-	-	-	-	-	-	-	-	-	-	-	-	-	-	-	-	-	-	-	-	-	-	-	-	-	yes	-	-	-	-	-	-	-	38.36	5.44	6.88
	JS-NGO-03s	NGO-HM1	63-125	54	110	140	14	26950	-	-	-	-	-	-	-	-	-	-	-	-	-	-	-	-	-	-	-	-	-	-	-	yes	-	-	-	-	-	-	-	-	-	-	-	-	-	-	38.52	8.17	0.9647
	JS-NGO-03s	NGO-HM1	63-125	55	130	90	22	32175	yes	-	-	-	-	-	-	-	-	-	-	-	-	-	-	-	yes	-	-	-	-	-	-	-	-	-	-	-	-	-	-	-	-	-	-	-	-	-	37.67	3.75	7.58
	JS-NGO-03s	NGO-HM1	63-125	56	80	70	16	11200	-	-	-	-	-	-	-	-	-	-	-	-	-	-	-	-	-	-	-	-	-	-	yes	-	-	-	-	-	-	-	-	-	-	-	-	-	-	-	38.31	7.27	1.1912
	JS-NGO-03s	NGO-HM1	63-125	57	80	100	18	18000	-	-	-	-	-	-	-	-	-	-	-	-	-	-	-	-	-	-	-	-	-	-	-	-	-	-	-	-	-	-	-	-	-	-	yes	-	-	carbonaceous matter	37.55	4.49	2.94
	JS-NGO-03s	NGO-HM1	63-125	58	50	110	14	9625	-	-	-	-	-	-	-	-	-	-	-	-	-	-	-	yes	-	-	-	-	-	-	-	-	-	-	-	-	-	-	-	-	-	-	-	-	-	-	37.21	5.45	1.95
	JS-NGO-03s	NGO-HM1	63-125	59	130	100	18	29250	yes	-	-	-	-	-	-	-	-	-	-	-	-	-	-	-	-	-	-	-	-	-	-	-	-	-	-	-	-	-	-	-	-	-	-	-	-	-	37.75	3.84	6.96
	JS-NGO-03s	NGO-HM1	63-125	60	30	60	18	4050	-	-	-	-	-	-	-	-	-	-	-	-	-	-	-	-	-	-	-	-	-	-	yes	-	-	-	-	-	-	-	-	-	-	-	-	-	-	-	37.83	9.27	0.9154
	JS-NGO-03s	NGO-HM1	63-125	61	120	90	16	21600	-	-	-	yes	-	-	-	-	-	-	-	-	-	-	-	-	-	-	-	-	-	-	yes	-	-	-	-	-	-	-	-	-	-	-	-	-	-	-	37.51	6.37	0.975
	JS-NGO-03s	NGO-HM1	63-125	62	120	110	22	36300	-	-	-	-	-	-	-	-	-	-	-	-	-	-	-	-	-	-	-	-	-	-	yes	-	-	-	-	-	-	-	-	-	-	-	-	-	-	-	37.97	7.49	1.204
	JS-NGO-03s	NGO-HM1	63-125	63	100	90	22	24750	yes	-	-	-	-	-	-	-	-	-	-	-	-	-	-	-	-	-	-	-	-	-	-	-	-	-	-	-	-	-	-	-	-	-	-	-	-	-	37.31	3.11	9.41
	JS-NGO-03s	NGO-HM1	63-125	64	70	100	12	10500	-	-	-	-	-	-	-	-	-	-	-	yes	-	-	yes	-	-	-	-	-	-	-	-	-	-	-	-	-	-	yes	-	-	-	-	-	-	yes	carbonate + pyrophyllite	37.72	6.94	1.288
	JS-NGO-03s	NGO-HM1	63-125	65	90	60	14	9450	yes	-	-	-	-	-	-	-	-	-	-	-	-	-	-	-	-	-	-	-	-	-	-	-	-	-	-	-	-	-	-	-	-	-	-	-	-	-	37.35	3.26	7.21
	JS-NGO-03s	NGO-HM1	63-125	67	160	200	22	88000	-	-	-	-	-	-	-	-	-	-	-	-	-	-	-	yes	-	-	-	-	-	-	-	-	-	-	-	-	-	-	-	-	-	-	-	-	-	-	36.9	4.63	1.293
	JS-NGO-03s	NGO-HM1	63-125	68	80	90	16	14400	-	-	-	-	-	-	-	-	-	-	-	-	-	-	-	-	-	-	-	-	-	-	yes	-	-	-	-	-	-	-	-	-	-	-	-	-	-	-	37.58	5.81	0.9312
	JS-NGO-03s	NGO-HM1	63-125	69	120	100	24	36000	yes	-	-	-	-	-	-	-	-	-	-	-	-	-	-	-	-	-	-	-	-	-	-	-	-	-	-	-	-	-	yes	-	-	-	-	-	-	-	38.15	8.37	1.3774
	JS-NGO-03s	NGO-HM1	63-125	70	100	100	22	27500	-	-	-	-	-	-	-	-	-	-	-	-	-	-	-	-	-	-	-	-	-	-	yes	-	-	-	-	-	-	-	-	-	-	-	-	-	-	-	38.01	8.43	1.0505
	JS-NGO-03s	NGO-HM1	63-125	71	110	150	26	53625	yes	-	-	-	-	-	-	-	-	-	-	-	-	-	-	-	-	-	-	-	-	-	-	-	-	-	-	-	-	-	-	-	-	-	-	-	-	-	36.56	4.06	1.89
	JS-NGO-03s	NGO-HM1	63-125	72	180	70	22	34650	-	-	-	-	-	-	-	-	-	-	-	-	-	-	-	-	-	-	-	-	-	-	yes	-	-	-	-	-	-	-	-	-	-	-	-	-	-	-	38.33	9.52	1.0198
	JS-NGO-03s	NGO-HM1	63-125	73	80	70	14	9800	yes	-	-	-	-	-	-	-	-	-	-	-	-	yes	-	-	-	-	-	-	-	-	-	-	-	-	-	-	-	-	-	-	-	-	-	yes	-	-	37.67	3.89	7.17
	JS-NGO-03s	NGO-HM1	63-125	74	110	70	16	15400	-	-	-	-	-	-	-	-	-	-	-	-	-	-	-	-	-	-	-	-	-	-	-	-	-	-	-	-	-	-	yes	-	-	-	-	-	-	-	37.9	4.44	7.58
	JS-NGO-03s	NGO-HM1	63-125	75	50	100	24	15000	-	-	-	-	-	-	-	-	-	-	-	-	-	-	-	-	-	-	-	-	-	-	-	-	-	-	-	-	-	yes	-	-	-	-	-	-	-	-	38.47	6.94	2.68
	JS-NGO-03s	NGO-HM1	63-125	76	80	120	20	24000	-	-	-	-	-	-	-	-	-	-	-	-	-	-	-	-	-	-	-	-	-	-	-	-	-	-	-	-	-	yes	-	-	-	-	-	-	yes	carbonate + carbonaceous matter + CO2	38.91	10.35	0.9163
	JS-NGO-03s	NGO-HM1	63-125	77	120	110	16	26400	-	-	-	-	-	-	-	-	-	-	-	-	-	yes	-	-	-	-	-	-	-	-	-	-	-	-	-	-	-	-	-	-	-	-	-	-	-	-	37.18	4.21	1.2179
	JS-NGO-03s	JS-NGO-03s_63-125_2nd	63-125	78	70	130	18	20475	yes	-	-	-	-	-	-	-	-	-	-	-	-	-	-	-	-	-	-	-	-	-	-	-	-	-	-	-	-	-	-	-	-	-	-	-	-	-	37.79	6.34	2.43
	JS-NGO-03s	JS-NGO-03s_63-125_2nd	63-125	79	80	90	22	19800	yes	-	-	-	-	-	-	-	-	-	-	-	-	-	-	-	-	-	-	-	-	-	-	-	-	-	-	-	-	-	-	-	-	-	-	-	-	-	38.34	7.48	2.44
	JS-NGO-03s	JS-NGO-03s_63-125_2nd	63-125	80	60	60	28	12600	-	-	-	-	-	-	-	-	-	-	-	-	-	-	-	-	-	-	-	-	-	-	yes	-	-	-	-	-	-	-	-	-	-	-	-	-	-	-	37.69	6.49	0.9218
	JS-NGO-03s	JS-NGO-03s_63-125_2nd	63-125	81	80	170	22	37400	-	-	-	-	-	-	-	-	-	-	-	-	-	-	-	-	-	-	-	-	-	-	yes	-	-	-	-	-	-	-	-	-	-	-	-	-	-	-	38.68	8.54	1.42
	JS-NGO-03s	JS-NGO-03s_63-125_2nd	63-125	82	100	70	30	26250	yes	-	-	-	-	-	-	-	-	-	-	-	-	-	-	-	-	-	-	-	-	-	-	-	-	-	-	-	-	-	-	-	-	-	-	-	-	-	39.64	11.75	2.07
	JS-NGO-03s	JS-NGO-03s_63-125_2nd	63-125	83	80	100	18	18000	-	-	-	-	-	-	-	-	-	-	-	-	-	-	-	-	-	-	-	-	-	-	yes	-	-	-	-	-	-	-	-	-	-	-	-	-	-	-	37.69	6.8	1.1491
	JS-NGO-03s	JS-NGO-03s_63-125_2nd	63-125	84	100	140	18	31500	yes	-	-	-	-	-	-	-	-	-	-	-	-	-	-	-	yes	-	-	-	-	-	-	-	-	-	-	-	-	-	-	-	-	-	-	-	-	-	37.64	4.44	7.85
	JS-NGO-03s	JS-NGO-03s_63-125_2nd	63-125	85	260	90	24	70200	-	-	-	-	-	-	-	-	-	-	-	-	yes	yes	-	-	-	-	-	-	-	-	-	-	-	-	-	-	-	-	-	-	-	-	-	-	-	muscovite-paragonite + phlogopite-biotite	37.85	6.25	1.79
	JS-NGO-03s	JS-NGO-03s_63-125_2nd	63-125	86	130	90	16	23400	-	-	-	-	-	-	-	-	-	-	-	-	-	yes	-	-	-	-	-	-	-	-	-	-	-	-	-	-	-	-	-	-	-	-	-	-	-	-	37.87	3.84	7.33
	JS-NGO-03s	JS-NGO-03s_63-125_2nd	63-125	87	100	80	28	28000	-	-	-	yes	-	-	-	-	-	-	-	yes	-	-	-	-	-	-	-	-	-	-	-	-	-	-	-	-	-	-	-	-	-	-	-	-	-	-	38.2	7.9	1.3758
	JS-NGO-03s	JS-NGO-03s_63-125_2nd	63-125	88	140	160	24	67200	yes	-	-	yes	-	-	-	-	-	-	-	-	-	yes	-	yes	-	-	-	-	-	-	-	-	-	-	-	-	-	-	-	-	-	-	-	-	-	-	38.34	7.96	1.2181
	JS-NGO-03s	JS-NGO-03s_63-125_2nd	63-125	89	50	100	12	7500	-	-	-	yes	-	-	-	-	-	-	-	-	-	-	-	-	-	-	-	-	-	-	-	-	-	-	-	-	-	-	-	-	-	-	-	-	-	-	39.02	9.27	0.9662
	JS-NGO-03s	JS-NGO-03s_63-125_2nd	63-125	90	70	60	12	6300	-	-	-	-	-	-	-	-	-	-	-	-	-	-	-	-	-	-	-	-	-	-	yes	-	-	-	-	-	-	-	-	-	-	-	-	-	-	-	38.18	7.73	0.9495
	JS-NGO-03s	JS-NGO-03s_63-125_2nd	63-125	91	160	60	18	21600	-	-	-	-	-	-	-	-	-	-	-	-	-	-	-	-	-	-	-	-	-	-	yes	-	-	-	-	-	-	-	-	-	-	-	-	-	-	-	39.5	10.89	1.0609
	JS-NGO-03s	JS-NGO-03s_63-125_2nd	63-125	92	60	90	12	8100	-	-	-	-	-	-	-	-	-	-	-	-	-	-	-	-	-	-	-	-	-	-	yes	-	-	-	-	-	-	-	-	-	-	-	-	-	-	-	38.06	7.55	1.1614
	JS-NGO-03s	JS-NGO-03s_63-125_2nd	63-125	93	170	130	18	49725	-	-	-	-	-	-	-	-	-	-	-	yes	-	-	-	-	-	-	-	-	-	-	-	-	-	-	-	-	-	-	-	-	-	-	-	-	-	-	37.91	6.7	1.2745
	JS-NGO-03s	JS-NGO-03s_63-125_2nd	63-125	94	90	90	14	14175	yes	-	-	-	-	-	-	-	-	-	-	-	-	-	-	-	yes	-	-	-	-	-	-	-	-	-	-	-	-	-	-	-	-	-	-	-	-	-	37.52	4.95	8.34
	JS-NGO-03s	JS-NGO-03s_63-125_2nd	63-125	95	80	90	14	12600	yes	-	-	-	-	-	-	-	-	-	-	-	-	-	-	-	-	-	-	-	-	-	-	-	-	-	-	-	-	-	-	-	-	-	-	-	-	-	37.29	4.49	3.05
	JS-NGO-03s	JS-NGO-03s_63-125_2nd	63-125	96	140	80	32	44800	-	-	-	-	-	-	-	yes	-	-	-	-	-	-	-	-	-	-	-	-	-	-	-	-	-	-	-	-	-	-	-	-	-	-	-	-	-	-	37.6	5.14	6.79
	JS-NGO-03s	JS-NGO-03s_63-125_2nd	63-125	97	90	110	34	42075	yes	-	-	-	-	-	-	-	-	-	-	-	-	-	-	-	-	-	-	-	-	-	-	-	-	-	-	-	-	-	-	-	-	-	-	-	-	-	37.05	2.36	7.35
	JS-NGO-03s	JS-NGO-03s_63-125_2nd	63-125	98	70	70	16	9800	-	-	-	yes	-	-	-	-	-	-	-	-	-	-	-	-	-	-	-	-	-	-	-	-	-	-	-	-	-	-	-	-	-	-	-	-	-	-	38.37	10.13	1.1517
	JS-NGO-03s	JS-NGO-03s_63-125_2nd	63-125	99	70	90	6	4725	yes	-	-	-	-	-	-	-	-	-	-	-	-	-	-	-	-	-	-	-	-	-	-	-	-	-	-	-	-	-	-	-	-	-	-	-	-	-	36.85	1.3961	6.5
	JS-NGO-03s	JS-NGO-03s_63-125_2nd	63-125	100	50	80	12	6000	-	-	-	-	-	-	-	-	-	-	-	-	-	-	-	-	-	-	-	-	-	-	yes	-	-	-	-	-	-	-	-	-	-	-	-	-	-	-	37.9	7.32	1.016
	JS-NGO-03s	JS-NGO-03s_63-125_2nd	63-125	101	70	100	8	7000	-	-	-	-	-	-	-	-	-	-	-	-	-	-	-	-	-	-	-	-	-	-	yes	-	-	-	-	-	-	-	-	-	-	-	-	-	-	-	37.53	6.07	1.0671
	JS-NGO-03s	NGO-HM3	125-250	1	190	200	40	190000	-	-	-	-	-	-	-	-	-	-	-	-	-	-	-	-	-	-	-	-	-	-	yes	-	-	-	-	-	-	-	-	-	-	-	-	-	-	-	38.47	8.52	1.1253
	JS-NGO-03s	NGO-HM3	125-250	2	160	220	40	176000	yes	-	-	-	-	-	-	-	-	-	-	-	-	-	-	-	-	-	-	-	-	-	-	-	-	-	-	-	-	-	-	-	-	-	-	-	-	-	37.8	5.54	2.52
	JS-NGO-03s	NGO-HM3	125-250	3	310	220	40	341000	-	-	-	-	-	-	-	-	-	-	-	-	-	-	-	-	-	-	-	-	-	-	-	-	-	-	-	-	-	-	yes	-	-	-	-	-	-	-	38.31	7.24	1.2817
	JS-NGO-03s	NGO-HM3	125-250	4	230	120	40	138000	-	-	-	yes	-	-	-	-	-	-	-	-	-	-	-	-	-	-	-	-	-	-	-	-	-	-	-	-	-	-	-	-	-	-	-	-	-	-	37.84	4.61	1.2443
	JS-NGO-03s	NGO-HM3	125-250	5	200	120	40	120000	-	-	-	yes	-	-	-	-	-	-	-	-	-	-	-	-	-	-	-	-	-	-	-	-	-	-	-	-	-	-	-	-	-	-	-	-	-	-	38.24	5.94	9.05
	JS-NGO-03s	NGO-HM3	125-250	6	250	180	40	225000	-	-	-	-	-	-	-	-	-	-	-	-	-	yes	-	-	-	-	-	-	-	-	-	-	-	-	-	-	-	-	-	-	-	-	-	-	-	-	37.82	6.15	1.0951
	JS-NGO-03s	NGO-HM3	125-250	7	300	240	40	360000	yes	-	-	-	-	-	-	-	yes	-	-	-	-	-	-	-	yes	-	yes	-	-	-	-	-	-	-	-	-	-	-	-	-	-	-	-	-	-	-	38.12	3.92	9.83
	JS-NGO-03s	NGO-HM3	125-250	8	200	230	40	230000	-	-	-	-	-	-	-	-	-	-	-	-	-	yes	-	-	-	-	-	-	-	-	-	-	-	-	-	-	-	-	-	-	-	-	-	-	-	-	37.77	6.88	1.3896
	JS-NGO-03s	NGO-HM3	125-250	9	330	300	40	495000	-	-	-	-	-	-	-	-	-	-	-	yes	-	-	-	-	-	-	-	-	-	-	-	-	-	-	-	-	-	-	-	-	-	-	-	-	-	-	37.97	6.12	0.7959
	JS-NGO-03s	NGO-HM3	125-250	10	250	250	40	312500	-	-	-	-	-	-	-	-	-	-	-	yes	-	-	-	-	-	-	-	-	-	-	-	-	-	-	-	-	-	-	-	-	-	-	-	-	-	-	37.98	6.98	1.3034
	JS-NGO-03s	NGO-HM3	125-250	11	230	180	40	207000	-	-	-	yes	-	-	-	-	-	-	-	-	-	-	-	-	-	-	-	-	-	-	-	-	-	-	-	-	-	-	-	-	-	-	-	-	-	-	38.5	8.62	0.8555
	JS-NGO-03s	NGO-HM3	125-250	12	150	260	40	195000	yes	-	-	-	-	-	-	-	-	-	-	-	-	-	-	-	-	-	-	-	-	-	-	-	-	-	-	-	-	-	-	-	-	-	-	-	-	-	38.23	6.05	2.15
	JS-NGO-03s	NGO-HM3	125-250	13	160	280	40	224000	yes	-	-	-	-	-	-	-	-	-	-	-	-	-	-	-	-	-	-	-	-	-	-	-	-	-	-	-	-	-	-	-	-	-	-	-	-	-	37.75	4.9	2.02
	JS-NGO-03s	NGO-HM3	125-250	14	310	310	40	480500	-	-	-	-	-	-	-	-	-	-	-	-	-	-	-	-	-	-	-	-	-	-	-	-	-	-	yes	-	-	-	-	-	-	-	-	-	-	-	37.48	4.59	1.293
	JS-NGO-03s	NGO-HM3	125-250	15	150	160	40	120000	-	-	-	yes	-	-	-	-	-	-	-	-	-	yes	-	-	-	-	-	-	-	-	-	-	-	-	-	-	-	-	-	-	-	-	-	yes	-	-	38.05	4.94	3.49
	JS-NGO-03s	NGO-HM3	125-250	16	200	120	40	120000	-	-	-	yes	-	-	-	-	-	-	-	-	-	-	-	-	-	-	-	-	-	-	-	-	-	-	-	-	-	-	-	-	-	-	-	-	-	-	38.28	6.13	1.0895
	JS-NGO-03s	NGO-HM3	125-250	17	250	250	40	312500	-	-	-	-	-	-	-	-	-	-	-	-	-	-	-	-	-	-	-	-	-	-	-	-	-	-	yes	-	-	-	-	-	-	-	-	-	-	-	38.43	6.16	1.84
	JS-NGO-03s	NGO-HM3	125-250	18	170	360	40	306000	-	-	-	-	-	-	-	-	-	-	-	yes	-	-	-	-	-	-	-	-	-	-	-	-	-	-	yes	-	-	-	-	-	-	-	-	-	-	-	39.23	9.15	1.0128
	JS-NGO-03s	NGO-HM3	125-250	19	130	120	26	50700	-	-	-	-	-	-	-	-	-	-	-	-	-	-	-	-	-	-	-	-	-	-	-	-	-	-	-	-	-	-	-	-	-	yes	-	-	-	-	38.12	5.55	1.92
	JS-NGO-03s	NGO-HM3	125-250	20	80	150	24	36000	-	-	-	-	-	-	-	-	-	-	-	-	-	-	-	-	-	-	-	-	-	-	yes	-	-	-	-	-	-	-	-	-	-	-	-	-	-	-	38.87	9.87	0.801
	JS-NGO-03s	NGO-HM3	125-250	21	200	120	40	120000	-	-	-	-	-	-	-	-	yes	-	-	-	-	-	-	-	-	-	-	-	-	-	-	-	-	-	-	-	-	-	-	-	-	-	-	-	-	-	37.85	3.47	7.01
	JS-NGO-03s	NGO-HM3	125-250	22	280	160	40	224000	-	-	-	-	-	-	-	-	-	-	-	-	-	yes	-	-	-	-	-	-	-	-	-	-	-	-	-	-	-	-	-	-	-	-	-	-	-	-	38.39	6.79	1.1553
	JS-NGO-03s	NGO-HM3	125-250	23	120	200	40	120000	-	-	-	-	-	-	-	-	-	-	-	-	-	-	-	-	-	-	-	-	-	-	-	-	-	-	-	-	-	yes	-	-	-	-	-	-	-	-	38.64	7.86	1.57
	JS-NGO-03s	NGO-HM3	125-250	24	160	240	40	192000	-	-	-	-	-	-	-	-	-	-	-	-	-	-	yes	-	-	-	-	-	-	-	-	-	-	-	-	-	-	yes	-	-	-	yes	-	-	yes	carbonate + pyrophyllite, carbonate + pyrite	38.6	7.75	1.0367
	JS-NGO-03s	NGO-HM3	125-250	25	210	330	40	346500	yes	-	-	-	-	-	-	-	-	-	-	yes	-	-	-	-	-	-	-	-	-	-	yes	-	-	-	-	-	-	-	-	-	-	-	-	-	-	-	38.4	7.16	1.2579
	JS-NGO-03s	NGO-HM3	125-250	26	200	220	40	220000	yes	-	-	-	-	-	-	-	-	-	-	-	-	-	-	-	-	-	-	-	-	-	-	-	-	-	-	-	-	-	-	-	-	-	-	-	-	-	38.15	4.85	3.06
	JS-NGO-03s	NGO-HM3	125-250	27	190	190	40	180500	-	-	-	-	-	-	-	-	-	-	-	yes	-	-	-	-	-	-	-	-	-	-	-	-	-	-	-	-	-	-	-	-	-	-	-	yes	-	-	38.72	8.4	1.48
	JS-NGO-03s	NGO-HM3	125-250	28	180	200	40	180000	yes	-	-	-	-	-	-	-	-	-	-	-	-	yes	-	-	-	-	-	-	-	-	-	-	-	-	-	-	-	-	-	-	-	-	-	-	-	-	38.42	7.13	1.1422
	JS-NGO-03s	NGO-HM3	125-250	29	250	120	40	150000	-	-	-	-	-	-	-	-	-	-	-	yes	-	-	-	-	-	-	-	-	-	-	-	-	-	-	-	-	-	yes	-	-	-	-	-	-	yes	carbonate + carbonaceous matter	38.49	7.79	1.0922
	JS-NGO-03s	NGO-HM3	125-250	30	260	160	40	208000	yes	-	-	-	-	-	-	-	-	-	-	-	-	-	-	-	-	-	-	-	-	-	-	-	-	-	-	-	-	-	-	-	-	-	-	-	-	-	37.92	6.25	1.172
	JS-NGO-03s	NGO-HM3	125-250	31	170	160	40	136000	yes	-	-	-	-	-	-	-	-	-	-	-	-	-	-	-	-	-	-	-	-	-	-	-	-	-	-	-	-	-	-	-	-	-	-	-	-	-	37.81	5.81	0.9295
	JS-NGO-03s	NGO-HM3	125-250	32	170	100	40	85000	yes	-	-	-	-	-	-	-	-	-	-	-	-	-	-	-	-	-	-	-	-	-	-	-	-	-	-	-	-	-	-	-	-	-	-	-	-	-	37.91	5.36	1.2925
	JS-NGO-03s	NGO-HM3	125-250	33	230	200	40	230000	-	-	-	-	-	-	-	-	-	-	-	-	-	-	-	-	-	-	-	-	-	-	-	-	-	-	yes	-	-	-	-	-	-	-	-	-	-	-	38.06	6.05	2.5
	JS-NGO-03s	NGO-HM3	125-250	34	160	130	40	104000	yes	-	-	-	-	-	-	-	-	-	-	-	-	-	-	-	-	-	-	-	-	-	-	-	-	-	-	-	-	-	-	-	-	-	-	-	-	-	38.24	6.36	1.8
	JS-NGO-03s	NGO-HM3	125-250	35	200	140	40	140000	-	-	-	-	-	-	-	-	-	-	-	-	-	-	-	-	-	-	-	-	-	-	-	-	-	-	yes	-	-	-	-	-	-	-	-	-	-	-	37.17	3.49	1.57
	JS-NGO-03s	NGO-HM3	125-250	36	160	270	40	216000	-	-	-	-	-	-	-	-	-	-	-	-	-	-	-	yes	-	-	-	-	-	-	-	-	-	-	-	-	-	-	-	-	-	-	-	-	-	-	38.66	7.98	1.0504
	JS-NGO-03s	NGO-HM3	125-250	37	250	210	22	144375	-	-	-	-	-	-	-	-	-	-	-	yes	-	-	yes	-	-	-	-	-	-	-	-	-	-	-	-	-	-	yes	-	-	-	-	-	-	yes	carbonate + pyrophyllite + graphite	38.63	7.96	1.44
	JS-NGO-03s	NGO-HM3	125-250	38	170	330	40	280500	-	-	-	-	-	-	-	-	-	-	-	-	-	-	-	-	-	-	-	-	-	-	-	-	-	-	-	-	-	-	-	-	-	-	yes	-	-	-	38.54	7.38	1.3538
	JS-NGO-03s	JS-NGO-03s_125-250_2nd	125-250	39	270	190	40	256500	-	-	-	-	-	-	-	-	-	-	-	-	-	-	-	-	-	-	-	-	-	-	-	-	-	-	yes	-	-	-	-	-	-	-	-	-	-	-	37.65	5.89	1.83
	JS-NGO-03s	JS-NGO-03s_125-250_2nd	125-250	40	260	340	40	442000	yes	-	-	-	-	-	-	-	-	-	-	-	-	-	-	-	-	-	-	-	-	-	-	-	-	-	-	-	-	-	-	-	-	-	-	-	-	-	38.06	5.56	3.24
	JS-NGO-03s	JS-NGO-03s_125-250_2nd	125-250	41	190	150	40	142500	-	-	-	yes	-	-	-	-	-	-	-	-	-	-	-	-	-	-	-	-	-	-	-	-	-	-	-	-	-	-	-	-	-	-	-	-	-	-	39.78	12.36	1.0951
	JS-NGO-03s	JS-NGO-03s_125-250_2nd	125-250	42	400	160	40	320000	-	-	-	-	-	-	-	-	-	-	-	-	-	-	-	-	-	-	-	-	-	-	yes	-	-	-	-	-	-	-	-	-	-	-	-	-	-	-	38.47	7.93	0.9587
	JS-NGO-03s	JS-NGO-03s_125-250_2nd	125-250	43	220	220	40	242000	yes	-	-	-	-	-	-	-	-	-	-	-	-	-	-	-	-	-	-	-	-	-	-	-	-	-	-	-	-	-	-	-	-	-	-	-	-	-	37.4	4.73	2.41
	JS-NGO-03s	JS-NGO-03s_125-250_2nd	125-250	44	150	280	40	210000	-	-	-	-	-	-	-	-	-	-	-	-	-	yes	-	-	-	-	-	-	-	-	-	-	-	-	-	-	-	-	-	-	-	-	-	yes	-	-	38.22	6.66	1.2585
	JS-NGO-03s	JS-NGO-03s_125-250_2nd	125-250	45	280	290	40	406000	yes	-	-	-	-	-	-	-	-	-	-	-	-	-	-	-	-	-	-	-	-	-	yes	-	-	-	-	-	-	-	-	-	-	-	-	-	-	-	38.42	6.55	4.09
	JS-NGO-03s	JS-NGO-03s_125-250_2nd	125-250	46	310	350	40	542500	yes	-	-	-	-	-	-	-	-	-	-	-	-	-	-	-	-	-	-	-	-	-	-	-	-	-	-	-	-	-	yes	-	-	-	-	-	-	-	38.08	7.39	1.0708
	JS-NGO-03s	JS-NGO-03s_125-250_2nd	125-250	47	190	240	40	228000	yes	-	-	-	-	-	-	-	-	-	-	-	-	-	-	-	-	-	-	-	-	-	-	-	-	-	-	-	-	-	-	-	-	-	-	-	-	-	37.71	6.4	1.1917
	JS-NGO-03s	JS-NGO-03s_125-250_2nd	125-250	48	260	190	40	247000	-	-	-	-	-	-	-	-	-	-	-	-	-	-	-	yes	-	-	-	-	-	-	-	-	-	-	-	-	-	-	-	-	-	-	-	-	-	-	37.56	5.37	1.46
	JS-NGO-03s	JS-NGO-03s_125-250_2nd	125-250	49	220	210	40	231000	yes	-	-	-	-	-	-	-	-	-	-	-	-	yes	-	-	-	-	-	-	-	-	-	-	-	-	-	-	-	-	-	-	-	-	-	-	-	-	37.71	5.88	1.1141
	JS-NGO-03s	JS-NGO-03s_125-250_2nd	125-250	50	150	200	40	150000	yes	-	-	-	-	-	-	-	-	-	-	-	-	-	-	-	-	-	-	-	-	-	-	-	-	-	-	-	-	-	-	-	-	-	-	-	-	-	37.3	5.65	1.83
	JS-NGO-03s	JS-NGO-03s_125-250_2nd	125-250	51	280	150	40	210000	yes	-	-	-	-	-	-	-	-	-	-	-	-	-	-	-	-	-	-	-	-	-	-	-	-	-	-	-	-	-	-	-	-	-	-	-	-	-	36.98	4.1	2.6
	JS-NGO-03s	JS-NGO-03s_125-250_2nd	125-250	52	150	210	40	157500	-	-	-	-	-	-	-	-	-	-	-	-	-	-	-	-	-	-	-	-	-	-	yes	-	-	-	-	-	-	-	-	-	-	-	yes	-	-	-	38.83	10.06	0.9749
	JS-NGO-03s	JS-NGO-03s_125-250_2nd	125-250	53	230	340	40	391000	yes	-	-	-	-	-	-	-	-	-	-	-	-	-	-	-	-	-	-	-	-	-	-	-	-	-	yes	-	-	-	-	-	-	-	-	-	-	-	37.34	4.47	2.59
	JS-NGO-03s	JS-NGO-03s_125-250_2nd	125-250	54	260	260	40	338000	-	-	-	-	-	-	-	-	-	-	-	-	-	-	-	-	-	-	-	-	-	-	yes	yes	-	-	-	-	-	-	-	-	-	-	yes	-	-	-	37.94	7.64	1.1649
	JS-NGO-03s	JS-NGO-03s_125-250_2nd	125-250	55	170	180	40	153000	yes	-	-	-	-	-	-	-	-	-	-	-	-	yes	-	-	-	-	-	-	-	-	-	-	-	-	-	-	-	-	-	-	-	-	-	-	-	-	37.93	6.5	1.2232
	JS-NGO-03s	JS-NGO-03s_125-250_2nd	125-250	56	270	330	40	445500	yes	-	-	-	-	-	-	-	-	-	-	-	-	-	-	-	-	-	-	-	-	-	-	-	-	-	-	-	-	yes	-	-	-	-	-	-	-	-	37.8	4.55	5.55
	JS-NGO-03s	JS-NGO-03s_125-250_2nd	125-250	57	330	270	40	445500	yes	-	-	-	-	-	-	-	-	-	-	-	-	-	-	-	-	-	-	-	-	-	-	-	-	-	-	-	-	-	-	-	-	-	-	-	-	-	37.3	3.96	2.54
	JS-NGO-03s	JS-NGO-03s_125-250_2nd	125-250	58	270	290	40	391500	yes	-	-	-	-	-	-	-	-	-	-	-	-	-	-	-	-	-	-	-	-	-	-	-	-	-	-	-	-	-	-	-	-	-	-	-	-	-	37.78	6.83	0.7771
	JS-NGO-03s	JS-NGO-03s_125-250_2nd	125-250	59	120	340	40	204000	yes	-	-	-	-	-	-	-	-	-	-	-	-	-	-	-	-	-	-	-	-	-	-	-	-	-	-	-	-	-	-	-	-	-	-	-	-	-	37.99	6.82	1.2645
	JS-NGO-03s	JS-NGO-03s_125-250_2nd	125-250	60	290	240	40	348000	yes	-	-	-	-	-	-	-	yes	-	-	-	-	-	-	-	-	-	-	-	-	-	-	-	-	-	-	-	-	-	-	-	-	-	-	-	-	plagioclase (core) + quartz (rim)	38.27	6.85	1.2839
	JS-NGO-03s	JS-NGO-03s_125-250_2nd	125-250	61	260	200	40	260000	yes	-	-	-	-	-	-	-	-	-	-	-	-	-	-	-	-	-	-	-	-	-	-	-	-	-	-	-	-	-	-	-	-	-	-	-	-	-	37.69	6.72	1.1613
	JS-NGO-03s	JS-NGO-03s_125-250_2nd	125-250	62	260	350	40	455000	yes	-	-	-	-	-	-	-	yes	-	-	-	-	-	-	-	-	-	-	-	-	-	-	-	-	-	-	-	-	-	-	-	-	-	-	-	-	-	37.63	5.36	2.86
	JS-NGO-03s	JS-NGO-03s_125-250_2nd	125-250	63	410	270	40	553500	-	-	-	-	-	yes	-	-	-	-	-	-	-	-	-	-	-	-	-	-	-	-	-	-	-	-	-	-	-	-	-	yes	-	-	-	-	-	-	38.45	8.25	1.2235
	JS-NGO-03s	JS-NGO-03s_125-250_2nd	125-250	64	210	180	40	189000	yes	-	-	-	-	-	-	-	-	-	-	-	-	-	-	-	-	-	-	-	-	-	-	-	-	-	-	-	-	-	-	-	-	-	-	-	-	-	38.62	8.14	2.68
	JS-NGO-03s	JS-NGO-03s_125-250_2nd	125-250	65	220	160	40	176000	yes	-	-	-	-	-	-	-	-	-	-	-	-	-	-	-	-	-	-	-	-	-	-	-	-	-	-	-	-	-	-	-	-	-	-	-	-	-	37.81	6.16	1.2728
	JS-NGO-03s	JS-NGO-03s_125-250_2nd	125-250	66	170	200	40	170000	yes	-	-	-	-	-	-	-	-	-	-	-	-	-	-	-	-	-	-	-	-	-	-	-	-	-	-	-	-	-	-	-	-	-	-	-	-	-	37.48	4.51	3.26
	JS-NGO-03s	JS-NGO-03s_125-250_2nd	125-250	67	120	260	40	156000	-	-	-	yes	-	-	-	-	-	-	-	-	-	-	-	-	-	-	-	-	-	-	-	-	-	-	-	-	-	-	-	-	-	-	-	-	-	-	38.2	7.71	1.1599
	JS-NGO-03s	JS-NGO-03s_125-250_2nd	125-250	68	190	200	40	190000	-	-	-	-	-	-	-	-	-	-	-	-	-	-	-	-	-	-	-	-	-	-	-	-	-	-	yes	-	-	-	-	-	-	-	-	-	-	-	38.07	7.19	1.56
	JS-NGO-03s	JS-NGO-03s_125-250_2nd	125-250	69	140	360	40	252000	yes	-	-	-	-	-	-	-	-	-	-	-	-	-	-	-	-	-	-	-	-	-	-	-	-	-	-	-	-	-	-	-	-	-	-	-	-	-	37.75	6.48	1.3068
	JS-NGO-03s	JS-NGO-03s_125-250_2nd	125-250	70	180	260	40	234000	-	-	-	yes	-	-	-	-	-	-	-	-	-	-	-	-	-	-	-	-	-	-	-	-	-	-	-	-	-	-	yes	-	-	-	-	-	-	-	38.06	8.07	1.0803
	JS-NGO-03s	JS-NGO-03s_125-250_2nd	125-250	71	230	200	40	230000	-	-	-	-	-	-	-	-	-	-	-	-	-	-	-	-	-	-	-	-	-	-	yes	-	-	-	-	-	-	-	-	-	-	-	-	-	-	-	38.96	9.85	1.1039
	JS-NGO-03s	JS-NGO-03s_125-250_2nd	125-250	72	140	230	40	161000	-	-	-	-	-	-	-	-	-	-	-	yes	-	-	-	-	-	-	-	-	-	-	-	-	-	-	-	-	-	-	-	-	-	-	-	-	-	-	37.95	6.82	1.3507
	JS-NGO-03s	JS-NGO-03s_125-250_2nd	125-250	73	240	510	40	612000	-	-	-	-	-	-	-	-	-	-	-	-	-	-	-	-	-	-	-	-	-	-	-	-	-	-	-	-	yes	-	-	-	-	-	-	-	-	-	38.88	10.46	0.9662
	JS-NGO-03s	JS-NGO-03s_125-250_2nd	125-250	74	220	270	40	297000	yes	-	-	-	yes	-	-	-	-	-	-	-	-	-	-	-	-	-	-	-	-	-	-	-	-	-	-	-	-	-	-	-	-	-	-	-	-	-	38.51	9.41	0.999
	JS-NGO-03s	JS-NGO-03s_125-250_2nd	125-250	75	170	240	40	204000	-	-	-	-	-	-	-	-	-	-	-	-	-	-	-	-	-	-	-	-	-	-	-	-	-	-	-	-	-	-	yes	-	-	-	-	-	-	-	37.58	5.35	1.3625
	JS-NGO-03s	JS-NGO-03s_125-250_2nd	125-250	76	190	350	40	332500	-	-	-	-	-	-	-	-	-	-	-	-	-	-	-	-	-	-	-	-	-	-	yes	-	-	-	-	-	-	-	-	-	-	-	-	-	-	-	39.2	11.04	0.8786
	JS-NGO-03s	JS-NGO-03s_125-250_2nd	125-250	77	190	320	40	304000	yes	-	-	-	-	-	-	-	-	-	-	-	-	-	-	-	-	-	-	-	-	-	-	-	-	-	-	-	-	-	-	-	-	-	-	-	-	-	37.84	7.55	0.9553
	JS-NGO-03s	JS-NGO-03s_125-250_2nd	125-250	78	220	140	40	154000	-	-	-	-	-	-	-	-	yes	-	-	-	-	-	-	-	-	-	-	-	-	-	-	-	-	-	-	-	-	-	-	-	-	-	-	-	-	-	37.66	3.02	7.71
	JS-NGO-03s	JS-NGO-03s_125-250_2nd	125-250	79	330	280	40	462000	-	-	-	-	-	-	-	-	-	-	-	yes	-	-	-	-	-	-	-	-	-	-	yes	-	-	-	-	-	-	-	-	-	-	-	-	-	-	-	38.66	10.41	0.9545
	JS-NGO-03s	JS-NGO-03s_125-250_2nd	125-250	80	200	150	40	150000	-	-	-	-	-	-	-	-	-	-	-	yes	-	-	yes	-	-	-	-	-	-	-	-	-	-	-	-	-	-	yes	-	-	-	-	-	-	yes	carbonate + pyrophyllite + graphite + CO2	38.75	9.31	1.0192
	JS-NGO-03s	JS-NGO-03s_125-250_2nd	125-250	81	160	170	40	136000	yes	-	-	-	-	-	-	-	-	-	-	-	-	-	-	-	-	-	-	-	-	-	-	-	-	-	-	-	-	-	-	-	-	-	-	-	-	-	37.32	5.1	1.1247
	JS-NGO-03s	JS-NGO-03s_125-250_2nd	125-250	82	190	260	40	247000	-	-	-	-	-	-	-	-	-	-	-	-	-	-	-	-	-	-	-	-	-	-	yes	-	-	-	-	-	-	-	-	-	-	-	-	-	-	-	38.28	7.96	1.0551
	JS-NGO-03s	JS-NGO-03s_125-250_2nd	125-250	83	220	340	40	374000	-	-	-	-	-	-	-	-	-	-	-	-	-	-	-	-	-	-	-	-	-	-	-	-	-	-	-	-	-	-	-	-	-	-	-	-	-	-	37.41	4.28	3.15
	JS-NGO-03s	JS-NGO-03s_125-250_2nd	125-250	84	220	380	40	418000	-	-	-	yes	-	-	-	-	-	-	-	-	-	-	-	-	-	-	-	-	-	-	-	-	-	-	-	-	-	yes	-	-	-	-	-	-	yes	carbonate + carbonaceous matter + CO2	38.21	7.47	1.3415
	JS-NGO-03s	JS-NGO-03s_125-250_2nd	125-250	85	120	140	24	50400	yes	-	-	-	-	-	-	-	-	-	-	-	-	yes	-	-	-	-	-	-	-	-	-	-	-	-	-	-	-	-	-	-	-	-	-	-	-	-	37.78	5.97	3.06
	JS-NGO-03s	JS-NGO-03s_125-250_2nd	125-250	86	220	190	40	209000	yes	-	-	-	-	-	-	-	-	-	-	-	-	-	-	-	-	-	-	-	-	-	-	-	-	-	-	-	-	-	-	-	-	-	-	-	-	-	37.4	3.59	2.78
	JS-NGO-03s	JS-NGO-03s_125-250_2nd	125-250	87	250	240	40	300000	yes	-	-	-	-	-	-	-	-	-	-	-	-	-	-	-	-	-	-	-	-	-	-	-	-	-	-	-	-	-	yes	-	-	-	-	-	-	-	38.05	4.83	7.6
	JS-NGO-03s	JS-NGO-03s_125-250_2nd	125-250	89	160	260	40	208000	yes	-	-	-	-	-	-	-	-	-	-	-	-	-	-	-	-	-	-	-	-	-	-	-	-	-	-	-	-	-	-	-	-	-	-	-	-	-	37.62	6.84	1.1683
	JS-NGO-03s	JS-NGO-03s_125-250_2nd	125-250	90	140	230	40	161000	-	-	-	-	-	-	-	-	-	-	-	-	-	-	-	yes	-	-	-	-	-	-	-	-	-	-	-	-	-	-	-	-	-	-	-	-	-	-	37.31	4.62	1.2704
	JS-NGO-03s	JS-NGO-03s_125-250_2nd	125-250	91	240	170	40	204000	-	-	-	-	-	-	-	-	-	-	-	-	-	-	-	-	-	-	-	-	-	-	yes	-	-	-	-	-	-	-	-	-	-	-	-	-	-	-	37.89	7.74	1.0555
	JS-NGO-03s	JS-NGO-03s_125-250_2nd	125-250	92	210	260	40	273000	-	-	-	-	-	-	-	-	-	-	-	-	-	yes	-	-	-	-	-	-	-	-	-	-	-	-	-	-	-	-	-	-	-	-	-	-	-	-	37.72	6.62	2.2
	JS-NGO-03s	JS-NGO-03s_125-250_2nd	125-250	93	180	210	40	189000	-	-	-	-	-	yes	-	-	-	-	-	-	-	-	-	-	-	-	-	-	-	-	-	-	-	-	-	yes	-	-	-	-	-	-	-	-	-	monazite + brookite	39.25	12.44	1.98
	JS-NGO-03s	JS-NGO-03s_125-250_2nd	125-250	94	140	370	40	259000	-	-	-	-	-	-	-	-	-	-	-	-	-	yes	-	-	-	-	-	-	-	-	-	-	-	-	-	-	-	-	-	-	-	-	-	-	-	-	38.21	6.96	1.41
	JS-NGO-03s	JS-NGO-03s_125-250_2nd	125-250	95	170	190	40	161500	-	-	-	-	-	-	-	-	-	-	-	yes	-	-	-	-	-	-	-	-	-	-	yes	-	-	-	-	-	-	-	-	-	-	-	-	-	-	-	38.38	8.45	1.0328
	JS-NGO-03s	JS-NGO-03s_125-250_2nd	125-250	96	200	180	40	180000	-	-	-	-	-	-	-	-	-	-	-	yes	-	-	-	-	-	-	-	-	-	-	yes	-	-	-	-	-	-	-	-	-	-	-	-	-	-	-	37.47	7.72	1.2625
	JS-NGO-03s	JS-NGO-03s_125-250_2nd	125-250	97	130	200	40	130000	yes	-	-	-	-	-	-	-	-	-	-	-	-	-	-	-	-	-	-	-	-	-	-	-	-	-	-	-	-	-	-	-	-	-	-	-	-	-	37.35	3.63	2.13
	JS-NGO-03s	JS-NGO-03s_125-250_2nd	125-250	98	240	460	40	552000	yes	-	-	-	-	-	-	-	-	-	-	-	-	-	-	-	-	-	-	-	-	-	-	-	-	-	-	-	-	-	-	-	-	-	-	-	-	-	38.1	7.87	1.51
	JS-NGO-03s	JS-NGO-03s_125-250_2nd	125-250	99	260	320	40	416000	yes	-	-	-	-	-	-	-	-	-	-	-	-	-	-	-	-	-	-	-	-	-	-	-	-	-	-	-	-	-	-	-	-	-	-	-	-	secondary replacement by chlorite	37.21	4.92	1.265
	JS-NGO-03s	JS-NGO-03s_125-250_2nd	125-250	100	430	280	40	602000	-	-	-	-	-	-	-	-	-	-	-	-	-	-	-	-	-	-	-	-	-	-	-	-	-	-	-	-	-	-	yes	-	-	-	-	-	-	-	37.14	3.75	3.16
	JS-NGO-03s	JS-NGO-03s_125-250_2nd	125-250	101	320	140	40	224000	yes	-	-	-	-	-	-	-	-	-	-	-	-	-	-	-	-	-	-	-	-	-	-	-	-	-	-	-	-	-	-	-	-	-	-	-	-	-	38.04	6.79	1.036
	JS-NGO-03s	JS-NGO-03s_250-500_1st	250-500	1	300	380	40	570000	-	-	-	-	-	-	-	-	-	-	-	-	-	-	-	-	-	-	-	-	-	-	yes	-	-	-	-	-	-	-	-	-	-	-	-	-	-	-	38.47	7.44	1.2945
	JS-NGO-03s	JS-NGO-03s_250-500_1st	250-500	2	450	360	40	810000	yes	-	-	-	-	-	-	-	-	-	-	-	-	-	-	-	-	-	-	-	-	-	-	-	-	-	-	-	-	-	-	-	-	-	yes	-	-	-	37.75	3.34	7.6
	JS-NGO-03s	JS-NGO-03s_250-500_1st	250-500	3	400	300	40	600000	yes	-	-	-	-	-	-	-	-	-	-	-	-	-	-	-	-	-	-	-	-	-	-	-	-	-	yes	-	-	-	-	-	-	-	-	-	-	-	37.95	5.88	1.64
	JS-NGO-03s	JS-NGO-03s_250-500_1st	250-500	4	540	380	40	1026000	-	-	-	-	-	-	-	-	yes	-	-	-	-	-	-	-	-	-	-	-	-	-	-	-	-	-	-	-	-	-	-	-	-	-	-	-	-	plagioclase = anorthite	36.5	0.3243	29.59
	JS-NGO-03s	JS-NGO-03s_250-500_1st	250-500	5	460	360	40	828000	yes	-	-	-	-	-	-	-	-	-	-	-	-	-	-	-	-	-	-	-	-	-	-	-	-	-	-	-	-	-	-	-	-	-	-	-	-	-	37.64	3.63	5.79
	JS-NGO-03s	JS-NGO-03s_250-500_1st	250-500	6	500	320	40	800000	-	-	-	-	-	-	-	-	-	-	-	yes	yes	-	-	-	-	-	-	-	-	-	yes	-	-	-	-	-	-	-	-	-	-	-	-	-	-	-	38.45	7.82	1.1036
	JS-NGO-03s	JS-NGO-03s_250-500_1st	250-500	7	390	370	40	721500	-	-	-	-	-	-	-	-	-	-	-	-	-	-	-	-	-	-	-	-	-	-	yes	-	-	-	-	-	-	-	-	-	-	-	-	-	-	-	38.24	7.79	1.1107
	JS-NGO-03s	JS-NGO-03s_250-500_1st	250-500	8	340	460	40	782000	yes	-	-	-	-	-	-	-	-	-	-	-	-	-	-	-	-	-	-	-	-	-	-	-	-	-	-	-	-	-	-	-	-	-	-	-	-	-	37.81	5.71	1.72
	JS-NGO-03s	JS-NGO-03s_250-500_1st	250-500	9	320	440	40	704000	-	-	-	-	-	-	-	-	-	-	-	yes	-	-	-	-	-	-	-	-	-	-	yes	-	-	-	-	-	-	-	-	-	-	-	-	-	-	-	38.41	7.37	1.1879
	JS-NGO-03s	JS-NGO-03s_250-500_1st	250-500	10	660	640	40	2112000	-	-	-	-	-	-	-	-	-	-	-	-	-	yes	-	-	-	-	-	-	-	-	-	-	-	-	-	-	-	-	-	-	-	-	-	yes	-	-	37.53	5.04	1.2282
	JS-NGO-03s	JS-NGO-03s_250-500_1st	250-500	11	480	400	40	960000	-	-	-	yes	-	-	-	-	-	-	-	-	-	-	-	yes	-	-	-	-	-	-	-	-	-	-	-	-	-	-	-	-	-	-	-	-	-	-	37.52	4.93	2.68
	JS-NGO-03s	JS-NGO-03s_250-500_1st	250-500	12	220	450	40	495000	-	-	-	-	-	-	-	-	-	-	-	-	-	-	-	-	-	-	-	-	-	-	yes	-	-	-	-	yes	-	-	-	-	-	-	-	-	-	-	38.44	8.18	1.0208
	JS-NGO-03s	JS-NGO-03s_250-500_1st	250-500	13	360	470	40	846000	-	-	-	-	-	-	-	-	-	-	-	-	-	-	-	-	-	-	-	-	-	-	yes	yes	-	-	-	-	-	-	-	-	-	-	-	-	-	-	37.76	6.78	1.1372
	JS-NGO-03s	JS-NGO-03s_250-500_1st	250-500	14	330	440	40	726000	-	-	-	-	-	-	-	-	-	-	-	-	-	-	-	-	-	-	-	-	-	-	yes	-	-	-	-	-	-	-	-	-	-	-	-	-	-	-	39.27	11.23	0.9103
	JS-NGO-03s	JS-NGO-03s_250-500_1st	250-500	15	620	360	40	1116000	-	-	-	yes	-	-	-	-	-	-	-	yes	-	-	-	-	-	-	-	-	-	-	-	-	-	-	-	-	-	-	-	-	-	-	-	-	-	-	38.73	9.59	1.2133
	JS-NGO-03s	JS-NGO-03s_250-500_1st	250-500	16	420	270	40	567000	-	-	-	-	-	-	-	-	-	-	-	-	-	-	-	-	-	-	-	-	-	-	-	-	-	-	-	yes	-	yes	-	-	-	-	-	-	-	-	37.43	6.48	1.1579
	JS-NGO-03s	JS-NGO-03s_250-500_1st	250-500	17	420	480	40	1008000	yes	-	-	-	-	-	-	-	-	-	-	-	-	-	-	-	-	-	-	-	-	-	-	-	-	-	-	-	-	-	-	-	-	-	-	-	-	-	38.16	6.95	2.16
	JS-NGO-03s	JS-NGO-03s_250-500_1st	250-500	18	420	310	40	651000	yes	-	-	-	-	-	-	-	-	-	-	-	-	-	-	-	-	-	-	-	-	-	-	-	-	-	-	-	-	-	-	-	-	-	-	-	-	-	37.71	5.36	3.23
	JS-NGO-03s	JS-NGO-03s_250-500_1st	250-500	19	430	380	40	817000	yes	-	-	-	-	-	-	-	-	-	-	-	-	-	-	-	-	-	-	-	-	-	-	-	-	-	-	-	-	-	-	-	-	-	-	-	-	-	38.13	6.48	1.42
	JS-NGO-03s	JS-NGO-03s_250-500_1st	250-500	20	330	540	40	891000	-	-	-	-	-	-	-	-	-	-	-	-	-	-	-	yes	-	-	-	-	-	-	-	-	-	-	-	-	-	-	-	-	-	-	-	-	-	-	38.57	7.92	1.3767
	JS-NGO-03s	JS-NGO-03s_250-500_1st	250-500	21	260	290	40	377000	-	-	-	yes	-	-	-	-	-	-	-	-	yes	-	-	-	-	-	-	-	-	-	-	-	-	-	-	-	-	-	-	-	-	-	-	-	-	-	39.05	11.17	1.02
	JS-NGO-03s	JS-NGO-03s_250-500_1st	250-500	22	520	240	40	624000	-	-	-	yes	-	-	-	-	-	-	-	-	-	-	-	-	-	-	-	-	-	-	-	-	-	-	-	-	-	yes	-	-	-	-	-	-	yes	carbonate + carbonaceous matter	38.33	8.15	1.0579
	JS-NGO-03s	JS-NGO-03s_250-500_1st	250-500	23	380	480	40	912000	yes	-	-	-	-	-	-	-	yes	-	-	-	-	-	-	-	-	-	-	-	-	-	-	-	-	-	-	-	-	-	-	-	-	-	-	-	-	-	37.74	6.4	1.58
	JS-NGO-03s	JS-NGO-03s_250-500_1st	250-500	24	350	400	40	700000	yes	-	-	-	-	-	-	-	-	-	-	-	-	-	-	-	-	-	-	-	-	-	-	-	-	-	-	-	-	-	-	-	-	-	-	-	-	-	38.16	7.96	0.987
	JS-NGO-03s	JS-NGO-03s_250-500_1st	250-500	25	510	350	40	892500	yes	-	-	-	-	yes	-	-	-	-	-	-	-	yes	-	-	-	-	-	-	-	-	-	-	-	-	-	-	-	-	-	-	-	-	-	-	-	-	37.63	5.28	1.2662
	JS-NGO-03s	JS-NGO-03s_250-500_1st	250-500	26	430	520	40	1118000	-	-	-	-	yes	-	-	-	-	-	-	-	-	-	-	-	-	-	-	-	-	-	yes	-	-	-	yes	-	-	-	-	-	-	-	-	-	-	-	39.17	10.88	0.9027
	JS-NGO-03s	JS-NGO-03s_250-500_1st	250-500	27	280	380	40	532000	-	-	-	-	-	-	-	-	-	-	-	-	-	-	-	-	-	-	-	-	-	-	-	-	-	-	-	-	-	yes	-	-	-	-	-	-	-	carbonate + CO2	37.44	3.95	2.01
	JS-NGO-03s	JS-NGO-03s_250-500_1st	250-500	28	580	370	40	1073000	-	-	-	-	-	-	-	-	-	-	-	yes	yes	-	-	-	-	-	-	-	-	-	yes	-	-	-	-	-	-	-	-	-	-	-	-	-	-	-	39.31	11.27	0.8707
	JS-NGO-03s	JS-NGO-03s_250-500_1st	250-500	29	320	350	40	560000	-	-	-	-	-	-	-	-	-	-	-	-	-	-	-	-	-	-	-	-	-	-	-	-	-	-	yes	-	-	-	-	-	-	-	-	-	-	-	38.2	7.98	1.57
	JS-NGO-03s	JS-NGO-03s_250-500_1st	250-500	30	330	400	40	660000	-	-	-	-	-	-	-	-	-	-	-	-	yes	-	-	-	-	-	-	-	-	-	-	-	-	-	-	-	-	-	-	-	-	-	-	-	-	-	38.26	7.6	1.2111
	JS-NGO-03s	JS-NGO-03s_250-500_1st	250-500	31	280	280	12	117600	-	-	-	-	-	-	-	-	-	-	-	-	-	-	-	-	-	-	-	-	-	-	-	-	-	-	yes	-	-	-	-	-	-	-	-	-	-	-	38.2	7.97	1.1243
	JS-NGO-03s	JS-NGO-03s_250-500_1st	250-500	32	450	550	40	1237500	yes	-	-	-	-	-	-	-	-	-	-	-	-	-	-	-	-	-	-	-	-	-	-	-	-	-	-	-	-	-	-	-	-	-	-	-	-	-	37.62	4.77	3.13
	JS-NGO-03s	JS-NGO-03s_250-500_1st	250-500	33	410	290	40	594500	yes	-	-	-	-	-	-	-	-	-	-	-	-	-	-	-	-	-	-	-	-	-	-	-	-	-	yes	-	-	-	-	-	-	-	-	-	-	-	38.02	7.33	1.0895
	JS-NGO-03s	JS-NGO-03s_250-500_1st	250-500	34	280	440	40	616000	-	-	-	-	-	yes	-	-	-	-	-	-	-	-	-	-	-	-	-	-	-	-	-	-	-	-	yes	-	-	-	-	-	-	-	-	-	-	zircon + brookite	38.29	8.34	1.2071
	JS-NGO-03s	JS-NGO-03s_250-500_1st	250-500	35	380	760	40	1444000	yes	-	-	-	-	-	-	-	-	-	-	-	-	-	-	-	-	-	-	-	-	-	-	-	-	-	-	-	-	-	-	-	-	-	-	-	-	-	38.09	6.77	0.9993
	JS-NGO-03s	JS-NGO-03s_250-500_1st	250-500	36	600	300	40	900000	-	-	-	-	-	yes	-	-	-	-	-	-	-	-	-	-	-	-	-	-	-	-	yes	-	-	-	-	-	-	-	-	-	-	-	-	yes	-	-	37.89	7.36	1.2136
	JS-NGO-03s	JS-NGO-03s_250-500_1st	250-500	37	580	180	40	522000	yes	-	-	yes	-	-	-	-	-	-	-	-	-	-	-	-	-	-	-	-	-	-	-	-	-	-	-	-	-	-	-	-	-	-	-	-	-	quartz + rutile	38.27	8.3	0.941
	JS-NGO-03s	JS-NGO-03s_250-500_1st	250-500	38	500	390	40	975000	yes	-	-	-	-	-	-	-	-	-	-	-	-	-	-	-	-	-	-	-	-	-	-	-	-	-	-	-	-	-	-	-	-	-	-	-	-	-	38.46	8.05	1.18
	JS-NGO-03s	JS-NGO-03s_250-500_1st	250-500	39	340	540	40	918000	yes	-	-	-	-	-	-	-	-	-	-	-	-	-	-	-	-	-	-	-	-	-	-	-	-	-	-	-	-	-	-	-	-	-	-	-	-	-	37.82	6.38	1.0064
	JS-NGO-03s	JS-NGO-03s_250-500_1st	250-500	40	450	370	40	832500	yes	-	-	-	-	-	-	-	-	-	-	-	-	-	-	-	-	-	-	-	-	-	-	-	-	-	-	-	-	-	-	-	-	-	-	-	-	-	38.1	7.59	1.3429
	JS-NGO-03s	JS-NGO-03s_250-500_1st	250-500	41	260	210	40	273000	-	-	-	-	-	-	-	-	-	-	-	-	yes	-	-	-	-	-	-	-	-	-	-	-	-	-	-	-	-	-	-	-	-	-	-	-	-	-	38.23	7.78	2.19
	JS-NGO-03s	JS-NGO-03s_250-500_1st	250-500	42	460	470	40	1081000	-	-	-	-	-	-	-	-	-	-	-	yes	-	-	-	-	-	-	-	-	-	-	-	-	-	-	-	-	-	-	-	-	-	-	-	-	-	-	38.25	8.35	1.0569
	JS-NGO-03s	JS-NGO-03s_250-500_1st	250-500	43	400	370	40	740000	-	-	-	-	-	-	-	-	-	-	-	-	yes	-	-	yes	-	-	-	-	-	-	-	-	-	-	-	-	-	-	-	-	-	-	-	-	-	-	37.58	5.92	1.2181
	JS-NGO-03s	JS-NGO-03s_250-500_1st	250-500	44	250	350	40	437500	yes	-	-	-	-	-	-	-	-	-	-	-	-	-	-	-	-	-	-	-	-	-	-	-	-	-	-	-	-	-	-	-	-	-	-	-	-	-	37.61	5.72	1.49
	JS-NGO-03s	JS-NGO-03s_250-500_1st	250-500	45	440	330	40	726000	yes	-	-	-	-	-	-	-	yes	-	-	-	-	-	-	-	-	-	-	-	-	-	-	-	-	-	-	-	-	-	-	-	-	-	-	-	-	-	37.37	4.11	2.14
	JS-NGO-03s	JS-NGO-03s_250-500_1st	250-500	46	420	180	40	378000	yes	-	-	-	-	-	-	-	-	-	-	-	-	-	-	-	-	-	-	-	-	-	-	-	-	-	yes	-	-	-	-	-	-	-	-	-	-	quartz + zircon	38.25	8.17	1.41
	JS-NGO-03s	JS-NGO-03s_250-500_1st	250-500	47	290	370	40	536500	yes	-	-	yes	-	-	-	-	-	-	-	-	-	-	yes	-	-	-	-	-	-	-	-	-	-	-	-	-	-	yes	-	-	-	-	-	-	yes	carbonate + pyrophyllite + CO2	36.68	1.76	2.6
	JS-NGO-03s	JS-NGO-03s_250-500_1st	250-500	48	270	410	40	553500	-	-	-	-	-	-	-	-	-	-	-	-	-	-	-	-	-	-	-	-	-	-	yes	-	-	-	-	-	-	-	-	-	-	-	-	-	-	-	38.71	9.66	0.951
	JS-NGO-03s	JS-NGO-03s_250-500_1st	250-500	49	330	240	40	396000	yes	-	-	yes	-	-	-	-	-	-	-	-	-	-	-	-	-	-	-	-	-	-	-	-	-	-	-	-	-	-	-	-	-	-	-	-	-	-	38.79	9.62	0.9464
	JS-NGO-03s	JS-NGO-03s_250-500_1st	250-500	50	320	270	40	432000	-	-	-	-	-	-	-	-	-	-	-	-	-	yes	-	-	-	-	-	-	-	-	-	-	-	-	-	-	-	-	-	-	-	-	-	-	-	-	38.27	7.18	1.0735
	JS-NGO-03s	JS-NGO-03s_250-500_1st	250-500	51	320	320	40	512000	yes	-	-	-	-	-	-	-	-	-	-	-	-	-	-	-	-	-	-	-	-	-	-	-	-	-	-	-	-	-	-	-	-	-	-	-	-	-	37.71	5.51	1.43
	JS-NGO-03s	JS-NGO-03s_250-500_1st	250-500	52	500	420	40	1050000	-	-	-	-	-	-	-	-	-	-	-	-	-	-	yes	-	-	-	-	-	-	-	-	-	-	-	-	-	-	yes	-	-	-	-	-	-	yes	carbonate + pyrophyllite + CO2	37.38	5.13	1.98
	JS-NGO-03s	JS-NGO-03s_250-500_1st	250-500	53	550	360	40	990000	-	-	-	-	-	-	-	-	-	-	-	-	-	-	-	-	-	-	-	-	-	-	-	-	-	-	yes	-	-	-	-	-	-	-	-	-	-	-	37.9	6.24	1.71
	JS-NGO-03s	JS-NGO-03s_250-500_1st	250-500	54	400	520	40	1040000	-	-	-	yes	-	-	-	-	-	-	-	yes	-	-	-	-	-	-	-	-	-	-	yes	-	-	-	-	-	-	-	-	-	-	-	-	-	-	-	38.16	7.93	1.2653
	JS-NGO-03s	JS-NGO-03s_250-500_1st	250-500	55	240	370	40	444000	-	-	-	-	-	-	-	-	-	-	-	-	-	-	-	-	-	-	-	-	-	-	yes	-	-	-	-	-	-	-	-	-	-	-	-	-	-	-	38.79	10.65	0.9755
	JS-NGO-03s	JS-NGO-03s_250-500_1st	250-500	56	430	310	40	666500	yes	-	-	-	-	-	-	-	-	-	-	-	-	yes	-	-	-	-	-	-	-	-	-	-	-	-	-	-	-	-	-	-	-	-	-	yes	-	-	37.63	5.2	1.0588
	JS-NGO-03s	JS-NGO-03s_250-500_1st	250-500	57	300	320	40	480000	-	yes	-	-	-	yes	-	-	-	-	-	-	-	yes	-	-	-	-	-	-	-	-	-	-	-	-	-	-	-	-	-	-	-	-	-	-	-	cristobalite + phlogopite-biotite + brookite	38.03	7.89	1.43
	JS-NGO-03s	JS-NGO-03s_250-500_2nd	250-500	58	480	300	40	720000	-	-	-	-	-	-	-	-	-	-	-	-	-	-	-	-	-	-	-	-	-	-	-	-	-	-	-	-	-	-	yes	-	-	-	-	-	-	-	37.73	5.37	1.86
	JS-NGO-03s	JS-NGO-03s_250-500_2nd	250-500	59	300	200	40	300000	-	-	-	yes	-	-	-	-	-	-	-	yes	-	-	-	-	-	-	-	-	-	-	-	-	-	-	-	-	-	-	-	-	-	-	-	-	-	-	38.14	7.22	1.3745
	JS-NGO-03s	JS-NGO-03s_250-500_2nd	250-500	60	300	290	40	435000	yes	-	-	-	-	-	-	-	-	-	-	yes	yes	-	-	-	-	-	-	-	-	-	-	-	-	-	yes	-	-	-	-	-	-	-	-	-	-	-	38.06	7.14	1.45
	JS-NGO-03s	JS-NGO-03s_250-500_2nd	250-500	61	240	360	40	432000	-	-	-	-	-	-	-	-	-	-	-	yes	-	-	-	-	-	-	-	-	-	-	yes	-	-	-	-	-	-	-	-	-	-	-	-	-	-	-	37.8	6.87	0.8863
	JS-NGO-03s	JS-NGO-03s_250-500_2nd	250-500	62	310	330	40	511500	-	-	-	-	-	-	-	-	-	-	-	-	-	-	-	-	-	-	-	-	-	-	yes	-	-	-	-	-	-	-	-	-	-	-	-	-	-	-	38.79	10.2	0.9836
	JS-NGO-03s	JS-NGO-03s_250-500_2nd	250-500	63	440	520	40	1144000	-	-	-	yes	-	-	-	-	-	-	-	yes	-	-	yes	yes	-	-	-	-	-	-	-	-	-	-	-	-	-	yes	yes	-	-	-	-	-	yes	carbonate + pyrophyllite + carbonaceous matter/graphite	38.15	7.23	1.2213
	JS-NGO-03s	JS-NGO-03s_250-500_2nd	250-500	64	340	320	40	544000	-	-	-	-	-	-	-	-	-	-	-	-	-	yes	-	-	-	-	-	-	-	-	-	-	-	-	-	-	-	-	-	-	-	-	-	-	-	-	37.65	6.64	1.3541
	JS-NGO-03s	JS-NGO-03s_250-500_2nd	250-500	65	250	380	40	475000	yes	-	-	-	-	-	-	-	-	-	-	-	-	-	-	-	-	-	-	-	-	-	-	-	-	-	yes	-	-	-	-	-	-	-	-	-	-	-	37.94	6.67	1.6
	JS-NGO-03s	JS-NGO-03s_250-500_2nd	250-500	66	230	340	40	391000	yes	-	-	-	-	-	-	-	-	-	-	-	-	-	-	-	-	-	-	-	-	-	-	-	-	-	-	-	-	-	-	-	-	-	-	-	-	-	38.05	6.2	1.41
	JS-NGO-03s	JS-NGO-03s_250-500_2nd	250-500	67	280	270	40	378000	-	-	-	-	-	-	-	-	-	-	-	-	-	-	-	-	-	-	-	-	-	-	-	-	-	-	-	-	-	-	yes	-	-	-	-	-	-	-	38.08	6.65	1.83
	JS-NGO-03s	JS-NGO-03s_250-500_2nd	250-500	68	400	470	40	940000	yes	-	-	-	-	-	-	-	-	-	-	-	-	-	-	-	-	-	-	-	-	-	-	-	-	-	-	-	-	-	-	-	-	-	-	-	-	-	38.44	7.87	1.3577
	JS-NGO-03s	JS-NGO-03s_250-500_2nd	250-500	69	490	460	40	1127000	-	-	-	-	-	-	-	-	-	-	-	-	yes	-	-	-	-	-	-	-	-	-	yes	-	-	-	-	-	-	-	-	-	-	-	-	-	-	-	38.03	7.57	1.0204
	JS-NGO-03s	JS-NGO-03s_250-500_2nd	250-500	70	430	280	40	602000	-	-	-	yes	-	-	-	-	yes	-	-	yes	-	-	-	yes	-	-	-	-	-	-	-	-	-	-	-	-	-	yes	-	-	-	-	yes	-	-	-	38.23	7.43	1.4
	JS-NGO-03s	JS-NGO-03s_250-500_2nd	250-500	71	300	290	40	435000	-	-	-	-	-	-	-	-	-	-	-	-	-	yes	-	-	-	-	-	-	-	-	-	-	-	-	-	-	-	-	-	-	-	-	-	-	-	-	37.99	6.74	1.078
	JS-NGO-03s	JS-NGO-03s_250-500_2nd	250-500	72	380	300	40	570000	yes	-	-	-	-	-	-	-	-	-	-	-	-	-	-	-	-	-	-	-	-	-	-	-	-	-	-	-	-	-	-	-	-	-	-	-	-	-	38.33	6.92	2.17
	JS-NGO-03s	JS-NGO-03s_250-500_2nd	250-500	73	400	280	40	560000	yes	-	-	-	-	-	-	-	-	-	-	-	-	-	-	-	-	-	-	-	-	-	-	-	-	-	-	-	-	-	-	-	-	-	-	-	-	-	37.87	5.49	1.69
	JS-NGO-03s	JS-NGO-03s_250-500_2nd	250-500	74	360	420	40	756000	yes	-	-	-	-	-	-	-	-	-	-	-	-	-	-	-	-	-	-	-	-	-	-	-	-	-	-	-	-	-	-	-	-	-	-	-	-	-	37.79	6.08	1.2249
	JS-NGO-03s	JS-NGO-03s_250-500_2nd	250-500	75	240	200	40	240000	-	-	-	-	-	-	-	-	-	-	-	yes	-	-	-	-	-	-	-	-	-	-	-	-	-	-	-	-	-	yes	-	-	-	-	yes	-	-	carbonate + carbonaceous matter/graphite	38.79	8.33	1.1071
	JS-NGO-03s	JS-NGO-03s_250-500_2nd	250-500	76	240	380	40	456000	yes	-	-	-	yes	-	-	-	-	-	-	-	-	yes	-	-	-	-	-	-	-	-	-	-	-	-	-	-	-	-	-	-	-	-	-	-	-	-	37.73	4.26	2.79
	JS-NGO-03s	JS-NGO-03s_250-500_2nd	250-500	77	290	350	40	507500	-	-	-	-	-	-	-	-	-	-	-	-	-	-	-	yes	-	-	-	-	-	-	-	-	-	-	-	-	-	-	-	-	-	-	-	-	-	-	38.25	7.54	1.2926
	JS-NGO-03s	JS-NGO-03s_250-500_2nd	250-500	78	390	370	40	721500	yes	-	-	-	-	-	-	-	-	-	-	-	-	-	-	-	-	-	-	-	-	-	-	-	-	-	-	-	-	-	-	-	-	-	-	-	-	-	38.83	9.97	1.305
	JS-NGO-03s	JS-NGO-03s_250-500_2nd	250-500	79	160	370	40	296000	-	-	-	-	-	-	-	-	-	-	-	-	-	-	-	-	-	-	-	-	-	-	yes	-	-	yes	-	-	-	-	-	-	-	-	-	-	-	-	38.3	7.79	2.02
	JS-NGO-03s	JS-NGO-03s_250-500_2nd	250-500	80	420	370	40	777000	-	-	-	-	-	-	-	-	-	-	-	-	-	-	-	-	-	-	-	-	-	-	-	-	-	-	-	-	-	yes	-	-	-	-	-	-	yes	carbonate + carbonaceous matter	38.69	8.95	1.1331
	JS-NGO-03s	JS-NGO-03s_250-500_2nd	250-500	81	460	260	40	598000	yes	-	-	-	-	-	-	-	-	-	-	-	-	-	-	-	-	-	-	-	-	-	-	-	-	-	-	-	-	-	-	-	-	-	-	-	-	-	37.37	5.3	1.3362
	JS-NGO-03s	JS-NGO-03s_250-500_2nd	250-500	82	280	430	40	602000	yes	-	-	-	-	-	-	-	yes	-	-	-	-	-	-	-	-	-	-	-	-	-	-	-	-	-	-	-	-	-	-	-	-	-	-	yes	-	quartz + plagioclase + hydrous phase	37.93	5.37	3.26
	JS-NGO-03s	JS-NGO-03s_250-500_2nd	250-500	83	340	380	40	646000	yes	-	-	-	-	-	-	-	-	-	-	-	-	-	-	-	-	-	-	-	-	-	-	-	-	-	-	-	-	-	-	-	-	-	-	-	-	-	37.65	6.05	1.2538
	JS-NGO-03s	JS-NGO-03s_250-500_2nd	250-500	84	270	370	40	499500	-	-	-	-	-	-	-	-	-	-	-	-	-	-	-	-	-	-	-	-	-	-	yes	-	-	-	-	-	-	-	-	-	-	-	-	-	-	-	37.65	7.36	1.3353
	JS-NGO-03s	JS-NGO-03s_250-500_2nd	250-500	85	400	290	40	580000	-	-	-	-	-	yes	-	-	-	-	-	-	-	-	-	-	-	-	-	-	-	-	-	-	-	-	-	-	-	-	-	-	-	-	-	-	-	-	38.16	7.82	1.3532
	JS-NGO-03s	JS-NGO-03s_250-500_2nd	250-500	86	290	260	40	377000	-	-	-	yes	-	-	-	-	-	-	-	yes	-	-	-	-	-	-	-	-	-	-	-	-	-	-	-	-	-	-	-	-	-	-	-	-	-	-	38.23	7.58	1.104
	JS-NGO-03s	JS-NGO-03s_250-500_2nd	250-500	87	240	340	40	408000	yes	-	-	-	-	-	-	-	yes	-	-	-	-	-	-	-	-	-	-	-	-	-	-	-	-	-	-	-	-	yes	-	-	-	-	-	-	-	-	37.01	1.81	9.89
	JS-NGO-03s	JS-NGO-03s_250-500_2nd	250-500	88	240	280	40	336000	-	-	-	yes	-	-	-	-	-	-	-	-	-	-	-	-	-	-	-	-	-	-	-	-	-	-	-	-	-	-	-	-	-	-	-	-	-	-	38.82	10.13	0.9432
	JS-NGO-03s	JS-NGO-03s_250-500_2nd	250-500	89	360	230	40	414000	-	-	-	-	-	-	-	-	-	-	-	-	-	-	-	-	-	-	-	-	-	-	yes	-	-	-	-	-	-	-	-	-	-	-	-	-	-	-	38.52	8.13	1.079
	JS-NGO-03s	JS-NGO-03s_250-500_2nd	250-500	90	370	360	40	666000	yes	-	-	-	-	-	-	-	-	-	-	-	-	-	-	-	-	-	-	-	-	-	-	-	-	-	-	-	-	yes	-	-	-	-	yes	-	-	-	39.54	12.36	0.9623
	JS-NGO-03s	JS-NGO-03s_250-500_2nd	250-500	91	530	350	40	927500	-	-	-	-	-	-	-	-	-	-	-	-	-	-	-	-	-	-	-	-	-	-	-	-	-	-	yes	-	-	-	-	-	-	-	-	-	-	-	38.23	6.51	1.3596
	JS-NGO-03s	JS-NGO-03s_250-500_2nd	250-500	92	320	540	40	864000	yes	-	-	-	-	-	-	-	-	-	-	-	-	-	-	-	-	-	-	-	-	-	-	-	-	-	-	-	-	-	-	-	-	-	-	-	-	-	38.38	8.64	1.1485
	JS-NGO-03s	JS-NGO-03s_250-500_2nd	250-500	93	350	280	40	490000	yes	-	-	-	-	-	-	-	-	-	-	-	-	-	-	-	-	-	-	-	-	-	-	-	-	-	-	-	-	-	-	-	-	-	-	-	-	-	38.2	7.01	1.54
	JS-NGO-03s	JS-NGO-03s_250-500_2nd	250-500	94	240	250	40	300000	yes	-	-	-	-	-	-	-	-	-	-	-	-	-	-	-	-	-	-	-	-	-	-	-	-	-	-	-	-	-	-	-	-	-	-	-	-	-	38.72	8.56	2.07
	JS-NGO-03s	JS-NGO-03s_250-500_2nd	250-500	95	350	320	40	560000	-	-	-	yes	-	-	-	-	-	-	-	-	-	-	-	-	-	-	-	-	-	-	-	-	-	-	-	-	-	-	-	-	-	-	-	-	-	-	37.25	5.11	0.8799
	JS-NGO-03s	JS-NGO-03s_250-500_2nd	250-500	96	250	550	40	687500	-	-	-	yes	-	-	-	-	-	-	-	-	-	-	-	-	-	-	-	-	-	-	yes	-	-	-	-	-	-	-	-	-	-	-	-	-	-	-	38.1	7.36	1.1901
	JS-NGO-03s	JS-NGO-03s_250-500_2nd	250-500	97	520	390	40	1014000	-	-	-	-	-	-	-	-	-	-	-	-	-	yes	-	-	-	-	-	-	-	-	-	-	-	-	-	-	-	-	-	-	-	-	-	-	-	-	37.66	5.44	1.1756
	JS-NGO-03s	JS-NGO-03s_250-500_2nd	250-500	98	440	540	40	1188000	-	-	-	yes	-	-	-	-	-	-	-	-	-	-	-	-	-	-	-	-	-	-	-	-	-	-	-	-	-	-	-	-	-	-	-	-	-	-	38.56	8.48	1.2234
	JS-NGO-03s	JS-NGO-03s_250-500_2nd	250-500	99	180	480	40	432000	-	-	-	yes	-	yes	-	-	-	-	-	yes	-	-	-	-	-	-	-	-	-	-	-	-	-	-	-	-	-	-	-	-	-	-	-	-	-	-	38.15	8.24	1.1182
	JS-NGO-03s	JS-NGO-03s_250-500_2nd	250-500	100	230	310	40	356500	-	-	-	-	-	-	-	-	yes	-	-	-	-	-	-	-	-	-	-	-	-	-	-	-	-	-	yes	-	-	-	-	-	-	-	yes	-	-	-	37.4	3.3	6.1
	JS-NGO-09s	NGO-HM1	63-125	1	100	130	12	19500	-	-	-	-	-	-	-	-	-	-	-	-	-	-	-	yes	-	-	-	-	-	-	-	-	-	-	-	-	-	-	-	-	-	-	-	-	-	-	37.93	7.34	0.8947
	JS-NGO-09s	NGO-HM1	63-125	2	90	60	12	8100	-	-	-	-	-	-	-	-	-	-	-	-	-	-	-	-	-	-	-	-	-	-	yes	-	-	-	-	-	-	-	-	-	-	-	-	-	-	-	37.96	7.84	0.8955
	JS-NGO-09s	NGO-HM1	63-125	3	110	130	20	35750	-	-	-	-	-	-	-	-	-	-	-	-	-	-	-	-	-	-	-	-	-	-	-	-	-	-	yes	-	-	-	-	-	-	-	-	-	-	-	37.74	7.64	0.5837
	JS-NGO-09s	NGO-HM1	63-125	4	100	110	32	44000	yes	-	-	-	-	-	-	-	-	-	-	-	-	-	-	-	-	-	-	-	-	-	-	-	-	-	-	-	-	-	-	-	-	-	-	-	-	-	37.15	3.91	8.08
	JS-NGO-09s	NGO-HM1	63-125	5	90	80	14	12600	-	-	-	-	-	-	-	-	-	-	-	-	-	-	-	-	-	-	-	-	-	-	yes	-	-	-	-	-	-	-	-	-	-	-	-	-	-	-	37.86	8.92	0.9252
	JS-NGO-09s	NGO-HM1	63-125	6	80	120	40	48000	-	-	-	-	-	-	-	-	-	-	-	-	-	-	-	-	-	-	-	-	-	-	-	yes	-	-	-	-	-	-	-	-	-	-	-	-	-	-	37.82	8.4	0.8748
	JS-NGO-09s	NGO-HM1	63-125	7	70	40	18	6300	-	-	-	-	-	-	-	-	-	-	-	-	-	-	-	-	-	-	-	-	-	-	-	-	-	-	-	-	-	-	-	-	-	-	yes	-	-	-	37.16	4.47	6.3
	JS-NGO-09s	NGO-HM1	63-125	8	110	100	30	41250	-	-	-	-	-	-	-	-	-	-	-	-	-	-	-	yes	-	-	-	-	-	-	-	-	-	-	-	-	-	-	-	-	-	-	-	-	-	-	37.16	4.7	1.95
	JS-NGO-09s	NGO-HM1	63-125	9	70	100	20	17500	-	-	-	-	-	-	-	-	-	-	-	-	-	-	-	-	-	-	-	-	-	-	yes	-	-	-	-	-	-	-	-	-	-	-	-	-	-	-	38.05	8.78	0.8949
	JS-NGO-09s	NGO-HM1	63-125	10	90	110	10	12375	-	-	-	-	-	-	-	-	-	-	-	-	-	-	-	-	-	-	-	-	-	-	yes	-	-	-	-	-	-	-	-	-	-	-	-	-	-	-	37.37	7.47	0.9436
	JS-NGO-09s	NGO-HM1	63-125	11	140	120	20	42000	-	-	-	-	-	-	-	-	-	-	-	yes	-	-	-	-	-	-	-	-	-	-	-	-	-	-	-	-	-	-	-	-	-	-	-	-	-	-	37.6	9.05	0.9003
	JS-NGO-09s	NGO-HM1	63-125	12	90	100	28	31500	-	-	-	-	-	-	-	-	-	-	-	-	-	-	-	-	-	-	-	-	-	-	yes	-	-	-	-	-	-	-	-	-	-	-	-	-	-	-	36.86	5.37	1.0566
	JS-NGO-09s	NGO-HM1	63-125	13	100	120	20	30000	-	-	-	yes	-	-	-	-	-	-	-	yes	-	-	-	-	-	-	-	-	-	-	-	-	-	-	-	-	-	-	-	-	-	-	-	-	-	-	38.57	11.07	2.55
	JS-NGO-09s	NGO-HM1	63-125	14	120	17	18	4590	-	-	-	-	-	-	-	-	-	-	-	-	-	-	-	-	-	-	-	-	-	-	yes	-	-	-	-	-	-	-	-	-	-	-	-	-	-	-	37.15	7.3	0.9967
	JS-NGO-09s	NGO-HM1	63-125	15	80	90	12	10800	-	-	-	-	-	-	-	-	-	-	-	-	-	-	-	-	-	-	-	-	-	-	yes	-	-	-	yes	-	-	-	-	-	-	-	-	-	-	-	37.75	8.74	0.8557
	JS-NGO-09s	NGO-HM1	63-125	16	100	90	28	31500	-	-	-	yes	-	-	-	-	-	-	-	-	-	-	-	-	-	-	-	-	-	-	yes	-	-	-	-	-	-	-	-	-	-	-	-	-	-	-	37.93	8.55	0.8361
	JS-NGO-09s	NGO-HM1	63-125	17	80	110	26	28600	-	-	-	-	-	-	-	-	-	-	-	-	-	-	-	-	-	-	-	-	-	-	yes	-	-	-	-	-	-	-	-	-	-	-	-	-	-	-	37.74	8.55	0.8223
	JS-NGO-09s	NGO-HM1	63-125	18	100	120	24	36000	yes	-	-	-	-	-	-	-	-	-	-	-	-	-	-	-	-	-	-	-	-	-	-	-	-	-	-	-	-	-	-	-	-	-	-	-	-	-	37.23	3.09	7.54
	JS-NGO-09s	NGO-HM1	63-125	19	130	70	16	18200	-	-	-	-	-	-	-	-	-	-	-	-	-	-	-	-	-	-	-	-	-	-	yes	-	-	-	-	-	-	-	-	-	-	-	-	-	-	-	38.1	8.79	0.9056
	JS-NGO-09s	NGO-HM1	63-125	20	90	70	12	9450	yes	-	-	-	-	-	-	-	-	-	-	-	-	-	-	-	-	-	-	-	-	-	-	-	-	-	-	-	-	-	-	-	-	-	-	-	-	-	36.33	0.729	7.84
	JS-NGO-09s	NGO-HM1	63-125	21	70	100	40	35000	-	-	-	-	-	-	-	-	-	-	-	-	-	-	-	-	-	-	-	-	-	-	yes	-	-	-	-	-	-	-	-	-	-	-	-	-	-	-	38.27	7.83	0.8942
	JS-NGO-09s	NGO-HM1	63-125	22	80	80	10	8000	yes	-	-	-	-	-	-	-	-	-	-	-	-	-	-	-	-	-	-	-	-	-	-	-	-	-	-	-	-	-	-	-	-	-	-	-	-	-	37.69	7.18	0.8922
	JS-NGO-09s	NGO-HM1	63-125	23	60	60	8	3600	-	-	-	-	-	-	-	-	-	-	-	-	-	-	-	-	yes	-	-	-	-	-	-	-	-	-	-	-	-	-	-	-	-	-	-	-	-	-	37.47	3.26	6.56
	JS-NGO-09s	NGO-HM1	63-125	24	130	130	28	59150	-	-	-	-	-	-	-	-	-	-	-	-	-	-	-	-	-	-	-	-	-	-	-	-	-	-	-	-	-	-	-	-	-	-	-	-	yes	CO2	39.24	11.33	1.3556
	JS-NGO-09s	NGO-HM1	63-125	25	130	60	30	29250	-	-	-	-	-	-	-	-	-	-	-	-	-	-	-	-	-	-	-	-	-	-	yes	-	-	-	-	-	-	-	-	-	-	-	-	-	-	-	38.2	8.95	0.8815
	JS-NGO-09s	NGO-HM1	63-125	26	120	120	40	72000	yes	-	-	-	-	-	-	-	-	-	-	-	-	-	-	-	-	-	-	-	-	-	-	-	-	-	-	-	-	-	-	-	-	-	-	-	-	-	38.6	5.9	6.7
	JS-NGO-09s	NGO-HM1	63-125	27	140	140	40	98000	-	-	-	yes	-	-	-	-	-	-	-	-	-	-	-	-	-	-	-	-	-	-	-	-	-	-	-	-	-	-	-	-	-	-	-	-	-	-	38.02	7.78	1.65
	JS-NGO-09s	NGO-HM1	63-125	28	80	70	20	14000	yes	-	-	-	-	-	-	-	-	-	-	-	-	-	-	-	-	-	-	-	-	-	-	-	-	-	-	-	-	-	-	-	-	-	-	-	-	-	38.24	8.47	0.8875
	JS-NGO-09s	NGO-HM1	63-125	29	110	150	40	82500	-	-	-	-	-	-	-	-	-	-	-	-	-	-	-	-	-	-	-	-	-	-	yes	-	-	-	-	-	-	-	-	-	-	-	-	-	-	-	37.99	7.92	0.7294
	JS-NGO-09s	NGO-HM1	63-125	30	80	80	14	11200	-	-	-	-	-	-	-	-	-	-	-	-	-	-	-	-	-	-	-	-	-	-	-	yes	-	-	-	-	-	-	-	-	-	-	-	-	-	-	37.69	7.59	0.9002
	JS-NGO-09s	NGO-HM1	63-125	31	80	70	16	11200	yes	-	-	-	-	-	-	-	-	-	-	-	-	-	-	-	-	-	-	-	-	-	-	-	-	-	-	-	-	-	-	-	-	-	-	-	-	-	37.53	3.92	6.89
	JS-NGO-09s	NGO-HM1	63-125	32	90	100	40	45000	yes	-	-	-	-	-	-	-	-	-	-	-	-	-	-	-	-	-	-	-	-	-	-	-	-	-	yes	-	-	-	-	-	-	-	-	-	-	-	37.31	2.81	10.25
	JS-NGO-09s	NGO-HM1	63-125	33	150	130	28	68250	-	-	-	-	-	-	-	-	-	-	-	-	-	-	-	-	-	-	-	-	-	-	-	-	-	-	-	-	-	-	yes	-	-	-	-	-	-	-	37.97	7.51	2.29
	JS-NGO-09s	NGO-HM1	63-125	34	80	70	22	15400	yes	-	-	-	-	-	-	-	-	-	-	-	-	-	-	-	-	-	-	-	-	-	-	-	-	-	-	-	-	-	-	-	-	-	-	-	-	-	36.96	3.81	6.71
	JS-NGO-09s	NGO-HM1	63-125	35	80	90	20	18000	-	-	-	-	-	-	-	-	-	-	-	-	-	-	-	-	-	-	-	-	-	-	yes	-	-	-	-	-	-	-	-	-	-	-	-	-	-	-	37.88	8.22	0.9323
	JS-NGO-09s	NGO-HM1	63-125	36	110	70	12	11550	-	-	-	yes	-	-	-	-	-	-	-	-	-	-	-	-	-	-	-	-	-	-	-	-	-	-	-	-	-	-	-	-	-	-	-	-	-	-	38.19	9	0.9698
	JS-NGO-09s	NGO-HM1	63-125	37	120	90	40	54000	-	-	-	-	-	-	-	-	-	-	-	-	-	-	-	-	-	-	-	-	-	-	-	yes	-	-	-	-	-	-	-	-	-	-	-	-	-	-	37.81	7.2	1.1327
	JS-NGO-09s	NGO-HM1	63-125	38	110	80	12	13200	-	-	-	yes	-	-	-	-	-	-	-	-	-	-	-	-	-	-	yes	-	-	-	-	-	-	-	-	-	-	-	-	-	-	-	-	-	-	-	38.13	7.92	0.9246
	JS-NGO-09s	NGO-HM1	63-125	39	150	100	40	75000	-	-	yes	-	-	-	-	-	-	-	-	-	yes	-	-	-	-	-	yes	-	-	-	-	-	-	-	-	-	-	yes	-	-	-	-	-	-	-	muscovite-paragonite + tridymite + amphibole + carbonate	37.82	5.67	1.52
	JS-NGO-09s	NGO-HM1	63-125	40	90	120	40	54000	-	-	-	-	-	-	-	-	-	-	-	-	-	-	-	-	-	-	-	-	-	-	yes	-	-	-	-	-	-	-	-	-	-	-	-	-	-	-	38.25	8.3	0.9427
	JS-NGO-09s	NGO-HM1	63-125	41	70	110	12	11550	-	-	-	-	-	-	-	-	-	-	-	-	-	-	-	-	-	-	-	-	-	-	yes	-	-	-	-	-	-	-	-	-	-	-	-	-	-	-	38.47	8.56	0.8072
	JS-NGO-09s	NGO-HM1	63-125	42	80	80	40	32000	-	-	-	yes	-	-	-	-	-	-	-	-	-	-	-	-	-	-	-	-	-	-	-	-	-	-	-	-	-	-	-	-	-	-	-	-	-	-	38.67	9.49	0.8395
	JS-NGO-09s	NGO-HM1	63-125	43	100	50	18	11250	-	-	-	yes	-	-	-	-	-	-	-	-	-	-	-	-	-	-	-	-	-	-	yes	-	-	-	-	-	-	-	-	-	-	-	-	-	-	-	38.5	8.52	0.8464
	JS-NGO-09s	NGO-HM1	63-125	44	110	80	20	22000	-	-	-	-	-	-	-	-	-	-	-	-	-	-	-	-	-	-	-	-	-	-	yes	-	-	-	-	-	-	-	-	-	-	-	-	-	-	-	38.37	7.94	0.9305
	JS-NGO-09s	NGO-HM1	63-125	45	110	80	24	26400	-	-	-	-	-	-	-	-	-	-	-	-	-	-	-	-	-	-	-	-	-	-	yes	-	-	-	-	-	-	-	-	-	-	-	-	-	-	-	38.13	8.33	0.9016
	JS-NGO-09s	NGO-HM1	63-125	46	110	70	18	17325	-	-	-	-	-	-	-	-	-	-	-	-	-	-	-	-	-	-	-	-	-	-	yes	-	-	-	-	-	-	-	-	-	-	-	-	-	-	-	38.29	7.74	0.8851
	JS-NGO-09s	NGO-HM1	63-125	47	40	80	16	6400	-	-	-	-	-	-	-	-	-	-	-	-	-	-	-	-	-	-	-	-	-	-	yes	-	-	-	-	-	-	-	-	-	-	-	-	-	-	-	38.77	9.12	0.9063
	JS-NGO-09s	NGO-HM1	63-125	48	90	60	12	8100	-	-	-	-	-	-	-	-	-	-	-	-	-	-	-	-	-	-	-	-	-	-	yes	-	-	-	-	-	-	-	-	-	-	-	-	-	-	-	37.78	6.89	0.9441
	JS-NGO-09s	NGO-HM1	63-125	49	80	70	40	28000	-	-	-	-	-	-	-	-	-	-	-	-	-	-	-	-	-	-	-	-	-	-	-	yes	-	-	-	-	-	-	-	-	-	-	-	-	-	-	38.45	9.07	0.925
	JS-NGO-09s	NGO-HM1	63-125	50	70	70	30	18375	-	-	-	-	-	-	-	-	-	-	-	-	-	-	-	-	-	-	-	-	-	-	-	-	-	-	-	-	-	-	yes	-	-	-	-	-	-	-	37.53	2.77	9.36
	JS-NGO-09s	NGO-HM1	63-125	51	100	60	14	10500	-	-	-	-	-	-	-	-	-	-	-	-	-	-	-	-	-	-	-	-	-	-	-	yes	-	-	-	-	-	-	-	-	-	-	-	-	-	-	38.26	8.1	0.8584
	JS-NGO-09s	NGO-HM1	63-125	52	80	140	32	44800	-	-	-	-	-	-	-	-	-	-	-	-	-	-	-	-	-	-	-	-	-	-	yes	-	-	-	-	-	-	-	-	-	-	-	-	-	-	-	38.11	8.34	0.9028
	JS-NGO-09s	NGO-HM1	63-125	53	100	80	8	8000	-	-	-	-	-	-	-	-	-	-	-	-	-	-	-	-	-	-	-	-	-	-	-	-	-	-	-	-	-	yes	-	-	-	-	-	-	-	-	37.87	7.21	4.75
	JS-NGO-09s	NGO-HM1	63-125	54	90	110	26	32175	-	-	-	-	-	-	-	-	-	-	-	-	-	-	-	-	-	-	-	-	-	-	yes	-	-	-	-	-	-	-	-	-	-	-	-	-	-	-	37.43	6.05	0.9891
	JS-NGO-09s	NGO-HM1	63-125	55	80	80	26	20800	-	-	-	-	-	-	-	-	-	-	-	-	-	-	-	-	-	-	-	-	-	-	yes	-	-	-	-	-	-	-	-	-	-	-	-	-	-	-	37.89	8.87	0.9312
	JS-NGO-09s	NGO-HM1	63-125	56	90	80	18	16200	yes	-	-	-	-	-	-	-	-	-	-	-	-	-	-	-	-	-	-	-	-	-	-	-	-	-	-	-	-	-	-	-	-	-	-	-	-	-	37.3	4.58	5.95
	JS-NGO-09s	NGO-HM1	63-125	57	52	64	8	3328	yes	-	-	-	-	-	-	-	-	-	-	-	-	-	-	-	-	-	-	-	-	-	-	-	-	-	-	-	-	-	-	-	-	-	-	-	-	-	36.88	4.17	6.81
	JS-NGO-09s	NGO-HM1	63-125	58	140	190	20	66500	-	-	-	-	-	-	-	-	-	-	-	yes	-	-	-	-	-	-	-	-	-	-	-	-	-	-	-	-	-	-	-	-	-	-	-	-	-	CO2	37.78	8.42	1.61
	JS-NGO-09s	NGO-HM1	63-125	59	110	180	40	99000	-	-	-	yes	-	-	-	-	-	-	-	-	-	-	-	-	-	-	-	-	-	-	yes	-	-	-	-	-	-	-	-	-	-	-	-	-	-	-	37.69	7.64	0.8729
	JS-NGO-09s	NGO-HM1	63-125	60	120	370	32	177600	-	-	-	-	-	-	-	-	-	-	-	-	-	-	-	-	-	-	-	-	-	-	yes	yes	-	-	-	-	-	-	-	-	-	-	-	-	-	-	37.55	8.06	0.9524
	JS-NGO-09s	NGO-HM1	63-125	61	90	110	16	19800	-	-	-	-	-	-	-	-	-	-	-	-	-	-	-	-	-	-	-	-	-	-	yes	-	-	-	-	-	-	-	-	-	-	-	-	-	-	-	37.97	8.67	0.8864
	JS-NGO-09s	NGO-HM1	63-125	62	60	70	24	12600	-	-	-	-	-	-	-	-	-	-	-	-	-	-	-	-	-	-	-	-	-	-	yes	yes	-	-	-	-	-	-	-	-	-	-	-	-	-	-	38.14	8.11	0.9359
	JS-NGO-09s	NGO-HM1	63-125	63	70	100	16	14000	-	-	-	-	-	-	-	-	-	-	-	-	-	-	-	-	-	-	-	-	-	-	yes	-	-	-	-	-	-	-	-	-	-	-	-	-	-	-	38.14	8.05	0.8865
	JS-NGO-09s	NGO-HM1	63-125	64	90	160	22	39600	-	-	-	-	-	-	-	-	-	-	-	-	-	-	-	-	-	-	-	-	-	-	yes	-	-	-	-	-	-	-	-	-	-	-	-	-	-	-	38.04	7.58	0.768
	JS-NGO-09s	NGO-HM1	63-125	65	80	90	18	16200	-	-	-	-	-	-	-	-	-	-	-	-	-	-	-	-	-	-	-	-	-	-	yes	-	-	-	-	-	-	-	-	-	-	-	-	-	-	-	38.05	8.09	0.8774
	JS-NGO-09s	NGO-HM1	63-125	66	120	120	38	68400	-	-	-	-	-	-	-	-	-	-	-	-	-	-	-	yes	-	-	-	-	-	-	-	-	-	-	-	-	-	-	-	-	-	-	-	-	-	-	37.84	9.14	0.8726
	JS-NGO-09s	NGO-HM1	63-125	67	150	120	26	58500	-	-	-	-	-	-	-	-	-	-	-	-	-	-	-	-	-	-	-	-	-	-	yes	-	-	-	-	-	-	-	-	-	-	-	-	-	-	-	37.56	7.08	0.9128
	JS-NGO-09s	NGO-HM1	63-125	68	110	100	24	33000	-	-	-	yes	-	-	-	-	-	-	-	-	-	-	-	-	-	-	-	-	-	-	yes	-	-	-	-	-	-	-	-	-	-	-	-	-	-	-	38.31	8.62	0.9357
	JS-NGO-09s	NGO-HM1	63-125	69	110	100	18	24750	yes	-	-	-	-	-	-	-	-	-	-	-	-	-	-	-	-	-	-	-	-	-	-	-	-	-	-	-	-	-	yes	-	-	-	-	-	-	-
	JS-NGO-09s	NGO-HM1	63-125	70	90	80	20	18000	-	-	-	-	-	-	-	-	-	-	-	-	-	-	-	-	-	-	-	-	-	-	-	-	-	-	yes	-	-	-	-	-	-	-	-	-	-	-	37.87	6.97	0.9531
	JS-NGO-09s	NGO-HM1	63-125	71	80	150	16	24000	yes	-	-	-	-	-	-	-	-	-	-	-	yes	yes	-	-	-	-	-	-	-	-	-	-	-	-	-	-	-	-	-	-	-	-	-	yes	-	quartz + muscovite-paragonite + phlogopite-biotite + unknown	38.14	8.65	1.1827
	JS-NGO-09s	NGO-HM1	63-125	72	110	160	40	88000	-	-	-	-	-	-	-	-	-	-	-	-	-	-	-	-	-	-	-	-	-	-	yes	-	-	-	-	-	-	-	-	-	-	-	-	-	-	-	37.87	6.97	1.1582
	JS-NGO-09s	NGO-HM1	63-125	73	110	100	40	55000	yes	-	-	-	-	-	-	-	-	-	-	-	-	-	-	-	-	-	-	-	-	-	-	-	-	-	-	-	-	-	-	-	-	-	-	-	-	-	37.79	5.4	7.46
	JS-NGO-09s	NGO-HM1	63-125	74	70	110	20	19250	-	-	-	-	-	-	-	-	-	-	-	-	-	-	-	-	-	-	-	-	-	-	yes	-	-	-	-	-	-	-	-	-	-	-	-	-	-	-	37.53	7.49	0.9637
	JS-NGO-09s	NGO-HM1	63-125	75	110	120	40	66000	-	-	-	-	-	-	-	-	-	-	-	-	-	-	-	-	-	-	-	-	-	-	-	yes	-	-	-	-	-	-	-	-	-	-	-	-	-	-	37.57	7.32	0.9197
	JS-NGO-09s	NGO-HM1	63-125	76	100	150	18	33750	-	-	-	-	-	-	-	-	-	-	-	-	-	-	-	-	-	-	-	-	-	-	yes	-	-	-	-	-	-	-	-	-	-	-	-	-	-	-	38.03	8.2	0.9453
	JS-NGO-09s	NGO-HM1	63-125	77	100	80	14	14000	-	-	-	-	-	-	-	-	-	-	-	-	-	-	-	-	-	-	-	-	-	-	yes	-	-	-	-	-	-	-	-	-	-	-	-	-	-	-	37.92	7.69	1.029
	JS-NGO-09s	NGO-HM1	63-125	78	110	120	14	23100	-	-	-	-	-	-	-	-	-	-	-	-	-	-	-	-	-	-	-	-	-	-	yes	-	-	-	-	-	-	-	-	-	-	-	-	-	-	-	37.85	8.39	0.8481
	JS-NGO-09s	NGO-HM1	63-125	79	100	90	34	38250	-	-	-	-	-	-	-	-	-	-	-	-	-	-	-	-	-	-	-	-	-	-	-	yes	-	-	-	-	-	-	-	-	-	-	-	-	-	-	38.02	7.88	0.9375
	JS-NGO-09s	NGO-HM1	63-125	80	80	80	20	16000	-	-	-	-	-	-	-	-	-	-	-	-	-	-	-	-	-	-	-	-	-	-	yes	-	-	-	-	-	-	-	-	-	-	-	-	-	-	-	37.77	7.63	0.8998
	JS-NGO-09s	NGO-HM1	63-125	81	130	130	22	46475	yes	-	-	-	-	-	-	-	-	-	-	-	-	-	-	-	-	-	-	-	-	-	-	-	-	-	-	-	-	-	-	-	-	-	-	-	-	-	38.21	8.55	2.37
	JS-NGO-09s	NGO-HM1	63-125	82	90	130	28	40950	-	-	-	-	-	-	-	-	-	-	-	-	-	-	-	-	-	-	-	-	-	-	yes	-	-	-	-	-	-	-	-	-	-	-	-	-	-	-	37.84	8.09	0.5583
	JS-NGO-09s	NGO-HM1	63-125	83	130	90	20	29250	yes	-	-	-	-	-	-	-	-	-	-	-	-	-	-	-	-	-	yes	-	yes	-	-	-	-	-	-	-	-	-	yes	-	-	yes	-	-	-	-	38.08	5.33	8.47
	JS-NGO-09s	NGO-HM1	63-125	84	100	80	18	18000	-	-	-	-	-	-	-	-	-	-	-	-	-	-	-	-	-	-	-	-	-	-	yes	-	-	-	-	-	-	-	-	-	-	-	-	-	-	-	38.68	9.08	0.679
	JS-NGO-09s	NGO-HM1	63-125	85	100	80	30	30000	yes	-	-	-	-	-	-	-	-	-	-	-	-	-	-	-	-	-	-	-	-	-	-	-	-	-	-	-	-	-	-	-	-	-	-	-	-	-	37.9	7.27	1.0203
	JS-NGO-09s	NGO-HM1	63-125	86	90	90	30	30375	yes	-	-	-	-	-	-	-	-	-	-	-	-	-	-	-	-	-	-	-	-	-	-	-	-	-	-	-	-	-	-	-	-	-	-	-	-	-	38.48	4.4	9.9
	JS-NGO-09s	NGO-HM1	63-125	87	100	100	34	42500	-	-	-	-	-	-	-	-	-	-	-	-	-	-	-	-	-	-	-	-	-	-	yes	-	-	-	-	-	-	-	-	-	-	-	-	-	-	-	38.3	8.7	0.8931
	JS-NGO-09s	NGO-HM1	63-125	88	80	60	30	18000	-	-	-	-	-	-	-	-	-	-	-	yes	-	-	-	-	-	-	-	-	-	-	-	-	-	-	-	-	-	-	-	-	-	-	-	-	-	-	37.33	3.99	1.3166
	JS-NGO-09s	NGO-HM1	63-125	89	100	120	24	36000	-	-	-	-	-	-	-	-	-	-	-	-	-	-	-	-	-	-	-	-	-	-	yes	-	-	-	-	-	-	-	-	-	-	-	-	-	-	-	38.35	7.33	0.8557
	JS-NGO-09s	NGO-HM1	63-125	90	80	70	8	5600	-	-	-	-	-	-	-	-	-	-	-	-	-	-	-	-	-	-	-	-	-	-	yes	yes	-	-	-	-	-	-	-	-	-	-	-	-	-	-	38.44	8.92	0.8009
	JS-NGO-09s	NGO-HM1	63-125	91	140	110	18	34650	yes	-	-	-	-	-	-	-	-	-	-	-	-	-	-	-	-	-	yes	-	-	-	-	-	-	-	-	-	-	-	-	-	-	-	-	-	-	-	37.63	4.01	8.18
	JS-NGO-09s	NGO-HM1	63-125	92	90	100	14	15750	-	-	-	-	-	-	-	-	-	-	-	-	-	-	-	-	-	-	-	-	-	-	yes	-	-	-	-	-	-	-	-	-	-	-	-	-	-	-
	JS-NGO-09s	NGO-HM1	63-125	93	90	100	18	20250	-	yes	-	-	-	-	-	-	-	yes	-	-	-	yes	-	-	-	-	-	-	-	-	-	-	-	-	-	-	-	-	-	-	-	-	-	-	-	cristobalite + kokchetavite + phlogopite-biotite	38.53	9.46	0.9516
	JS-NGO-09s	NGO-HM1	63-125	94	110	90	20	24750	-	-	-	yes	-	-	-	-	-	-	-	-	-	-	-	-	-	-	-	-	-	-	yes	-	-	-	-	-	-	-	-	-	-	-	-	-	-	-	38.49	8.84	0.8149
	JS-NGO-09s	NGO-HM1	63-125	95	120	80	18	21600	-	-	-	-	-	-	-	-	-	-	-	-	-	-	-	-	-	-	-	-	-	-	-	yes	-	-	-	-	-	-	-	-	-	-	-	-	-	-	38.73	8.87	0.9023
	JS-NGO-09s	NGO-HM1	63-125	96	60	100	22	16500	-	-	-	-	-	-	-	-	-	-	-	-	-	-	-	-	-	-	-	-	-	-	yes	-	-	-	-	-	-	-	-	-	-	-	-	-	-	-	37.75	6.6	0.8906
	JS-NGO-09s	NGO-HM1	63-125	97	90	100	14	15750	-	-	-	-	-	-	-	-	-	-	-	-	-	-	-	-	-	-	-	-	-	-	-	yes	-	-	-	-	-	-	-	-	-	-	-	-	-	-	37.38	8.04	0.8277
	JS-NGO-09s	NGO-HM1	63-125	98	60	60	8	3600	-	-	-	-	-	-	-	-	-	-	-	-	-	-	-	-	-	-	-	-	-	-	-	yes	-	-	-	-	-	-	-	-	-	-	-	-	-	-	37.92	8.24	0.8743
	JS-NGO-09s	NGO-HM1	63-125	99	70	70	18	11025	-	-	-	-	-	-	-	-	-	-	-	-	-	-	-	-	-	-	-	-	-	-	yes	-	-	-	-	-	-	-	-	-	-	-	-	-	-	-	37.82	8.24	0.8858
	JS-NGO-09s	NGO-HM1	63-125	100	50	80	14	7000	yes	-	-	-	-	-	-	-	-	-	-	-	-	-	-	-	-	-	-	-	-	-	-	-	-	-	-	-	-	-	-	-	-	-	-	-	-	-	37.84	5.92	6.92
	JS-NGO-09s	NGO-HM1	63-125	101	110	110	8	12100	-	-	-	yes	-	-	-	-	-	-	-	-	-	-	-	-	-	-	-	-	-	-	-	-	-	-	-	-	-	-	-	-	-	-	-	-	-	-	37.87	9.02	0.9015
	JS-NGO-09s	NGO-HM1	63-125	102	90	130	20	29250	-	-	-	-	-	-	-	-	-	-	-	-	-	-	-	-	-	-	-	-	-	-	-	-	-	-	yes	-	-	-	-	-	-	-	-	-	-	-	37.79	8.83	1.1044
	JS-NGO-09s	NGO-HM3	125-250	1	220	150	40	165000	-	-	-	-	-	-	-	-	-	-	-	-	-	-	-	-	-	-	-	-	-	-	yes	-	-	-	-	-	-	-	-	-	-	-	-	-	-	-	39.42	8.68	1.54
	JS-NGO-09s	NGO-HM3	125-250	2	50	120	16	12000	-	-	-	-	-	-	-	-	-	-	-	yes	-	yes	-	-	-	-	-	-	-	-	yes	yes	-	-	-	-	-	-	-	-	-	-	-	-	-	-	38.98	7.78	0.9239
	JS-NGO-09s	NGO-HM3	125-250	3	180	170	40	153000	-	-	-	-	-	-	-	-	-	-	-	-	-	-	-	-	-	-	-	-	-	-	yes	-	-	-	-	-	-	-	-	-	-	-	-	-	-	-	38.1	6.2	0.7956
	JS-NGO-09s	NGO-HM3	125-250	4	310	250	40	387500	-	-	-	yes	-	-	-	-	-	-	-	-	-	yes	-	yes	-	-	-	-	-	-	yes	-	-	-	-	-	-	-	-	-	-	-	-	-	-	-	39	8.41	0.8991
	JS-NGO-09s	NGO-HM3	125-250	5	100	240	26	78000	yes	-	-	-	-	-	-	-	-	-	-	-	-	-	-	-	-	-	-	-	-	-	yes	-	-	-	-	-	-	-	-	-	-	-	-	-	-	-	38.77	6.38	0.9488
	JS-NGO-09s	NGO-HM3	125-250	6	210	90	40	94500	-	-	-	-	-	-	-	-	-	-	-	-	-	-	-	-	-	-	-	-	-	-	yes	-	-	-	-	-	-	-	-	-	-	-	-	-	-	-	38.85	7.12	0.9259
	JS-NGO-09s	NGO-HM3	125-250	7	100	280	40	140000	-	-	-	-	-	-	-	-	-	-	-	-	-	-	-	-	-	-	-	-	-	-	yes	-	-	-	-	-	-	-	-	-	-	-	-	-	-	-	39.18	8.91	0.9266
	JS-NGO-09s	NGO-HM3	125-250	8	80	60	20	12000	-	-	-	-	-	-	-	-	-	-	-	-	-	-	-	-	-	-	-	-	-	-	yes	-	-	-	-	-	-	-	-	-	-	-	-	-	-	-	38.89	8.29	0.927
	JS-NGO-09s	NGO-HM3	125-250	9	150	250	40	187500	yes	-	-	-	-	-	-	-	yes	-	-	-	-	-	-	-	-	-	-	-	-	-	-	-	-	-	-	-	-	-	-	-	-	-	-	-	-	plagioclase (core) + quartz (rim)	38.65	6.89	1.49
	JS-NGO-09s	NGO-HM3	125-250	10	340	280	40	476000	-	-	-	-	-	-	-	-	-	-	-	-	-	-	-	-	-	-	-	-	-	-	yes	-	-	-	-	-	-	-	-	-	-	-	-	-	-	-	38.8	7.33	0.9319
	JS-NGO-09s	NGO-HM3	125-250	11	100	260	40	130000	-	-	-	yes	-	-	-	-	-	-	-	-	-	-	-	-	-	-	-	-	-	-	yes	-	-	-	-	-	-	-	-	-	-	-	-	-	-	-	39.18	8.77	0.9074
	JS-NGO-09s	NGO-HM3	125-250	12	230	210	40	241500	-	-	-	-	-	-	-	-	-	-	-	yes	-	yes	-	-	-	-	-	-	-	-	-	-	-	-	-	-	-	-	-	-	-	-	-	yes	-	-	39.02	8.21	0.8729
	JS-NGO-09s	NGO-HM3	125-250	13	110	120	40	66000	-	-	-	-	-	-	-	-	-	-	-	-	-	-	-	-	-	-	-	-	-	-	yes	-	-	-	-	-	-	-	-	-	-	-	-	-	-	-	39.12	8.67	0.8924
	JS-NGO-09s	NGO-HM3	125-250	14	160	210	40	168000	-	-	-	-	-	-	-	-	-	-	-	-	-	yes	-	-	-	-	-	-	-	-	-	-	-	-	-	-	-	-	-	-	-	-	-	-	-	-	38.37	6.88	0.934
	JS-NGO-09s	NGO-HM3	125-250	15	350	190	40	332500	yes	-	-	yes	-	-	-	-	-	-	-	-	-	-	-	-	-	-	-	-	-	-	-	-	-	-	-	-	-	-	-	-	-	-	-	-	-	-	39.32	8.4	0.8638
	JS-NGO-09s	NGO-HM3	125-250	16	100	180	40	90000	-	-	-	-	-	-	-	-	-	-	-	-	-	-	-	-	-	-	-	-	-	-	yes	yes	-	-	-	-	-	-	-	-	-	-	-	-	-	-	39.38	9.04	0.9418
	JS-NGO-09s	NGO-HM3	125-250	17	70	170	40	59500	-	-	-	-	-	-	-	-	-	-	-	-	-	-	-	-	-	-	-	-	-	-	yes	-	-	-	-	-	-	-	-	-	-	-	-	-	-	-	38.71	7.37	0.8608
	JS-NGO-09s	NGO-HM3	125-250	18	150	140	40	105000	-	-	-	-	-	-	-	-	-	-	-	-	-	-	-	-	-	-	-	-	-	-	yes	-	-	-	-	-	-	-	-	-	-	-	-	-	-	-	38.88	7.95	0.8958
	JS-NGO-09s	NGO-HM3	125-250	19	150	170	40	127500	-	-	-	-	-	-	-	-	-	-	-	-	-	-	-	-	-	-	-	-	-	-	-	-	-	-	yes	-	-	-	-	-	-	-	-	-	-	-	38.58	7.47	0.9003
	JS-NGO-09s	NGO-HM3	125-250	20	170	190	40	161500	-	-	-	-	-	-	-	-	-	-	-	-	-	-	-	-	-	-	-	-	-	-	yes	-	-	-	-	-	-	-	-	-	-	-	-	-	-	-	38.72	8.09	1.212
	JS-NGO-09s	NGO-HM3	125-250	21	100	80	40	40000	-	-	-	-	-	-	-	-	-	-	-	-	-	-	-	-	-	-	-	-	-	-	yes	-	-	-	-	-	-	-	-	-	-	-	-	-	-	-	38.83	8.4	0.8747
	JS-NGO-09s	NGO-HM3	125-250	22	280	200	40	280000	-	-	-	-	yes	-	-	-	-	-	-	yes	-	-	-	-	-	-	-	-	-	-	yes	-	-	-	-	-	-	-	-	-	-	-	-	-	-	-	38.74	9.11	1.0311
	JS-NGO-09s	NGO-HM3	125-250	23	230	210	40	241500	-	-	-	yes	-	-	-	-	-	-	-	-	-	-	-	-	-	-	-	-	-	-	yes	-	-	-	-	-	-	-	-	-	-	-	-	-	-	-	38.68	7.93	0.8832
	JS-NGO-09s	NGO-HM3	125-250	24	110	240	40	132000	-	-	-	-	-	-	-	-	-	-	-	-	-	-	-	-	-	-	-	-	-	-	yes	-	-	-	-	-	-	-	-	-	-	-	-	-	-	-	38.92	8.61	0.9227
	JS-NGO-09s	NGO-HM3	125-250	25	160	160	40	128000	-	-	-	-	-	-	-	-	-	-	-	-	-	-	-	-	-	-	-	-	-	-	-	-	-	-	-	-	-	yes	-	-	-	-	-	-	-	carbonate + carbonaceous matter + CO2	38.5	5.44	0.9567
	JS-NGO-09s	NGO-HM3	125-250	26	150	240	40	180000	-	-	-	yes	-	-	-	-	-	-	-	-	-	-	-	-	-	-	-	-	-	-	-	-	-	-	-	-	-	-	-	-	-	-	-	-	-	-	39.33	8.79	0.8886
	JS-NGO-09s	NGO-HM3	125-250	27	280	260	40	364000	-	-	-	-	-	yes	-	-	-	-	-	-	-	-	-	-	-	-	-	-	-	-	yes	-	-	-	-	-	-	-	-	-	-	-	-	-	-	-	39.27	9.06	0.9226
	JS-NGO-09s	NGO-HM3	125-250	28	260	150	40	195000	-	-	-	-	-	-	-	-	-	-	-	-	-	-	-	-	-	-	-	-	-	-	yes	-	-	-	-	-	-	-	-	-	-	-	-	-	-	-	39.16	8.94	0.9478
	JS-NGO-09s	NGO-HM3	125-250	29	160	200	40	160000	-	-	-	-	-	-	-	-	-	-	-	-	-	-	-	-	-	-	-	-	-	-	-	yes	-	-	yes	-	-	-	-	-	-	-	-	-	-	-	38.88	7.87	0.8847
	JS-NGO-09s	NGO-HM3	125-250	30	200	300	40	300000	-	-	-	yes	-	yes	-	-	-	-	-	-	-	-	-	-	-	-	-	-	-	-	yes	-	-	-	-	-	-	-	-	-	-	-	-	-	-	-	38.8	7.49	0.9033
	JS-NGO-09s	NGO-HM3	125-250	31	200	60	40	60000	-	-	-	-	-	-	-	-	-	-	-	-	-	-	-	-	-	-	-	-	-	-	yes	-	-	-	-	-	-	-	-	-	-	-	-	-	-	-	38.88	8.4	0.9038
	JS-NGO-09s	NGO-HM3	125-250	32	290	280	40	406000	-	-	-	-	-	-	-	-	-	-	-	-	-	-	-	-	-	-	-	-	-	-	yes	-	-	-	-	-	-	-	-	-	-	-	-	-	-	-	39.02	8.89	0.9247
	JS-NGO-09s	NGO-HM3	125-250	33	90	90	20	20250	yes	-	-	-	-	-	-	-	-	-	-	-	-	-	-	-	-	-	-	-	-	-	-	-	-	-	-	-	-	-	-	-	-	-	-	-	-	-	38.46	5.29	2.36
	JS-NGO-09s	NGO-HM3	125-250	34	190	210	40	199500	yes	-	-	-	-	-	-	-	yes	-	-	-	-	yes	-	-	-	-	-	-	-	-	-	-	-	-	-	-	-	-	-	-	-	-	-	yes	-	-	38.75	5.06	7.5
	JS-NGO-09s	NGO-HM3	125-250	35	130	80	40	52000	-	-	-	-	-	-	-	-	-	-	-	-	-	-	-	-	-	-	-	-	-	-	yes	yes	-	-	-	-	-	-	-	-	-	-	-	-	-	-	38.78	7.7	0.8303
	JS-NGO-09s	NGO-HM3	125-250	36	200	200	40	200000	-	-	-	-	-	-	-	-	-	-	-	-	-	-	-	-	-	-	-	-	-	-	yes	-	-	-	-	-	-	-	-	-	-	-	-	-	-	-	38.34	5.99	1.17
	JS-NGO-09s	NGO-HM3	125-250	37	200	220	40	220000	-	-	-	-	-	-	-	-	-	-	-	-	-	-	-	-	-	-	-	-	-	-	yes	-	-	-	-	-	-	-	-	-	-	-	-	-	-	-	38.86	7.53	0.9907
	JS-NGO-09s	NGO-HM3	125-250	38	40	140	18	12600	-	-	-	-	-	-	-	-	-	-	-	-	-	-	-	-	-	-	-	-	-	-	yes	-	-	-	-	-	-	-	-	-	-	-	-	-	-	-	38.72	9.26	0.8874
	JS-NGO-09s	NGO-HM3	125-250	39	110	100	40	55000	-	-	-	-	-	-	-	-	-	-	-	-	-	-	-	-	-	-	-	-	-	-	yes	-	-	-	-	-	-	-	-	-	-	-	-	-	-	-	38.75	8.75	0.9084
	JS-NGO-09s	NGO-HM3	125-250	40	120	390	40	234000	yes	-	-	-	-	-	-	-	-	-	-	-	-	-	-	-	-	-	-	-	-	-	yes	-	-	-	-	-	-	-	-	-	-	-	-	-	-	-	38.3	7.51	0.8467
	JS-NGO-09s	NGO-HM3	125-250	41	190	360	40	342000	-	-	-	-	-	-	-	-	-	-	-	-	-	-	-	-	-	-	-	-	-	-	yes	-	-	-	-	-	-	-	-	-	-	-	-	-	-	-	38.57	8.83	0.9325
	JS-NGO-09s	NGO-HM3	125-250	42	100	150	20	37500	-	-	-	-	-	-	-	-	-	-	-	-	-	-	-	-	-	-	-	-	-	-	yes	-	-	-	-	-	-	-	-	-	-	-	-	-	-	-	38.59	9.27	0.8552
	JS-NGO-09s	NGO-HM3	125-250	43	180	180	40	162000	-	-	-	-	-	-	-	-	-	-	-	yes	-	-	-	-	-	-	-	-	-	-	yes	-	-	-	-	-	-	-	-	-	-	-	-	-	-	-	38.66	8.47	0.9073
	JS-NGO-09s	NGO-HM3	125-250	44	170	140	40	119000	-	-	-	-	-	-	-	-	-	-	-	-	-	-	-	yes	-	-	-	-	-	-	-	-	-	-	-	-	-	-	-	-	-	-	-	-	-	-	38.67	8.27	0.9753
	JS-NGO-09s	NGO-HM3	125-250	45	320	120	40	192000	-	-	-	-	-	-	-	-	-	-	-	-	-	yes	-	-	-	-	-	-	-	-	-	-	-	-	-	-	-	-	-	-	-	-	-	yes	-	-	38.35	7.28	0.8971
	JS-NGO-09s	NGO-HM3	125-250	46	240	170	40	204000	-	-	-	-	-	-	-	-	-	-	-	-	-	-	-	-	-	-	-	-	-	-	yes	-	-	-	-	-	-	-	-	-	-	-	-	-	-	-	38.34	8.65	0.9084
	JS-NGO-09s	NGO-HM3	125-250	47	160	80	40	64000	-	-	-	-	-	-	-	-	-	-	-	-	-	-	-	-	-	-	-	-	-	-	yes	-	-	-	-	-	-	-	-	-	-	-	-	-	-	-	39.22	9.42	0.8974
	JS-NGO-09s	NGO-HM3	125-250	48	290	180	40	261000	-	-	-	-	-	-	-	-	-	-	-	-	-	yes	-	-	-	-	-	-	-	-	-	-	-	-	-	-	-	-	-	-	-	-	-	-	-	-	38.71	7.74	0.8953
	JS-NGO-09s	NGO-HM3	125-250	49	60	90	10	6750	-	-	-	-	-	-	-	-	-	-	-	-	-	-	-	-	-	-	-	-	-	-	yes	-	-	-	-	-	-	-	-	-	-	-	-	-	-	-	38.27	7.65	0.6838
	JS-NGO-09s	NGO-HM3	125-250	50	70	90	14	11025	-	-	-	-	-	-	-	-	-	-	-	-	-	-	-	-	-	-	-	-	-	-	yes	-	-	-	-	-	-	-	-	-	-	-	-	-	-	-	38.88	9.02	0.8911
	JS-NGO-09s	NGO-HM3	125-250	51	270	140	40	189000	yes	-	-	-	-	-	-	-	-	-	-	-	-	yes	-	-	-	-	-	-	-	-	-	-	-	-	-	-	-	-	-	-	-	-	-	yes	-	-	38.39	6.25	1.65
	JS-NGO-09s	NGO-HM3	125-250	52	240	210	40	252000	-	-	-	-	-	-	-	-	-	-	-	-	-	-	-	-	-	-	-	-	-	-	yes	-	-	-	-	-	-	-	-	-	-	-	-	-	-	-	38.82	7.83	0.8968
	JS-NGO-09s	NGO-HM3	125-250	53	110	210	40	115500	-	-	-	-	-	-	-	-	-	-	-	-	-	-	-	-	-	-	-	-	-	-	yes	-	-	-	-	-	-	-	-	-	-	-	-	-	-	-	38.12	5.83	1.2743
	JS-NGO-09s	NGO-HM3	125-250	54	200	220	40	220000	yes	-	-	-	-	-	-	-	-	-	-	-	-	yes	-	-	-	-	-	-	-	-	yes	-	-	-	-	-	-	-	-	-	-	-	-	yes	-	-	38.59	7.9	0.8258
	JS-NGO-09s	NGO-HM3	125-250	55	250	270	40	337500	-	-	-	-	-	-	-	-	-	-	-	-	-	-	-	-	-	-	-	-	-	-	yes	-	-	-	-	-	-	-	-	-	-	-	-	-	-	-	38.98	8.5	0.9048
	JS-NGO-09s	NGO-HM3	125-250	56	300	330	40	495000	-	-	-	-	-	-	-	-	-	-	-	-	-	-	-	-	-	-	-	-	-	-	yes	-	-	-	-	-	-	-	-	-	-	yes	-	-	-	-	39.17	7.46	0.9469
	JS-NGO-09s	NGO-HM3	125-250	57	160	190	40	152000	-	-	-	-	-	-	-	-	-	-	-	-	-	-	-	-	-	-	-	-	-	-	-	-	-	-	yes	-	-	-	-	-	-	-	-	-	-	-	38.55	8.21	0.9159
	JS-NGO-09s	NGO-HM3	125-250	58	170	240	40	204000	-	-	-	-	-	-	-	-	-	-	-	-	-	-	-	-	-	-	-	-	-	-	yes	-	-	-	-	-	-	-	-	-	-	-	-	-	-	-	39.27	8.95	0.8249
	JS-NGO-09s	NGO-HM3	125-250	59	180	220	40	198000	yes	-	-	-	-	-	-	-	-	-	-	-	-	-	-	-	-	-	-	-	-	-	-	-	-	-	-	-	-	-	-	-	-	-	-	-	-	-	38.39	6.35	1.43
	JS-NGO-09s	NGO-HM3	125-250	60	210	140	40	147000	-	-	-	-	-	-	-	-	-	-	-	-	-	-	-	-	-	-	-	-	-	-	yes	-	-	-	-	-	-	-	-	-	-	-	-	-	-	-	38.31	5.87	0.83
	JS-NGO-09s	NGO-HM3	125-250	61	90	200	40	90000	-	-	-	-	-	-	-	yes	-	-	-	-	-	-	-	-	-	-	-	-	-	-	-	-	-	-	-	-	-	-	-	-	-	yes	-	-	-	-	38.66	8.87	0.9617
	JS-NGO-09s	NGO-HM3	125-250	62	180	180	40	162000	yes	-	-	-	-	-	-	-	-	-	-	-	-	-	-	-	-	-	-	-	-	-	-	-	-	-	-	-	-	-	-	-	-	-	-	-	-	-	38.37	4.18	6.78
	JS-NGO-09s	NGO-HM3	125-250	63	190	190	40	180500	-	-	-	-	-	-	-	-	-	-	-	yes	-	-	-	-	-	-	-	-	-	-	yes	-	-	-	-	-	-	-	-	-	-	-	-	-	-	-	38.57	8.75	0.8918
	JS-NGO-09s	NGO-HM3	125-250	64	200	160	40	160000	yes	-	-	-	-	-	-	-	-	-	-	-	-	-	-	-	-	-	-	-	-	-	-	-	-	-	-	-	-	-	-	-	-	-	-	-	-	-	38.73	7.43	0.8868
	JS-NGO-09s	NGO-HM3	125-250	65	240	130	40	156000	-	-	-	yes	yes	-	-	-	-	-	-	yes	-	-	-	-	-	-	-	-	-	-	-	-	-	-	-	-	-	-	-	-	-	-	-	-	-	-	38.32	8	1.97
	JS-NGO-09s	NGO-HM3	125-250	66	170	310	40	263500	-	-	-	-	-	-	-	-	-	-	-	-	-	-	-	yes	-	-	-	-	-	-	-	-	-	-	-	-	-	-	-	-	-	-	-	-	-	-	39.19	9.36	0.8895
	JS-NGO-09s	NGO-HM3	125-250	67	170	120	40	102000	-	-	-	-	-	-	-	-	-	-	-	-	-	-	-	-	-	-	-	-	-	-	-	yes	-	-	yes	-	-	-	-	-	-	-	-	-	-	-	38.94	9.58	0.9369
	JS-NGO-09s	NGO-HM3	125-250	68	150	120	40	90000	-	-	-	-	-	-	-	-	-	-	-	-	-	-	-	-	-	-	-	-	-	-	yes	-	-	-	-	-	-	-	-	-	-	-	-	-	-	-	38.49	7.28	0.9848
	JS-NGO-09s	NGO-HM3	125-250	69	90	190	40	85500	-	-	-	-	-	-	-	-	-	-	-	-	-	-	-	-	-	-	-	-	-	-	yes	-	-	-	-	-	-	-	-	-	-	-	-	-	-	-	38.81	8.15	0.8638
	JS-NGO-09s	NGO-HM3	125-250	70	370	160	40	296000	yes	-	-	yes	-	-	-	-	-	-	-	-	-	-	-	-	-	-	-	-	-	-	-	-	-	-	-	-	-	-	-	-	-	-	-	-	-	-	38.43	8.59	0.9179
	JS-NGO-09s	NGO-HM3	125-250	71	190	190	40	180500	-	-	-	-	-	-	-	-	-	-	-	-	-	-	-	-	-	-	-	-	-	-	yes	-	-	-	-	-	-	-	-	-	-	-	-	-	-	-	38.89	8.77	0.8768
	JS-NGO-09s	NGO-HM3	125-250	72	200	310	40	310000	-	-	-	-	-	-	-	-	-	-	-	-	-	-	-	-	-	-	-	-	-	-	-	-	-	-	yes	-	-	-	-	-	-	yes	-	-	-	-	38.49	8.1	0.9503
	JS-NGO-09s	NGO-HM3	125-250	73	260	250	40	325000	-	-	-	-	-	yes	-	-	-	-	-	-	-	-	-	-	-	-	-	-	-	-	yes	-	-	-	-	-	-	-	-	-	-	-	-	-	-	-	39.09	9.11	0.9355
	JS-NGO-09s	NGO-HM3	125-250	74	180	160	40	144000	-	-	-	-	-	-	-	-	-	-	-	-	-	-	-	-	-	-	-	-	-	-	yes	-	-	-	-	-	-	-	-	-	-	-	-	-	-	-	38.55	7.43	0.8974
	JS-NGO-09s	NGO-HM3	125-250	75	160	160	60	192000	-	-	-	-	-	-	-	-	-	-	-	-	-	-	-	-	-	-	-	-	-	-	-	-	-	-	-	-	-	-	-	-	-	-	yes	-	-	-	38.76	7.11	0.8702
	JS-NGO-09s	NGO-HM3	125-250	76	260	220	40	286000	yes	-	-	-	-	-	-	-	-	-	-	-	-	-	-	-	-	-	-	-	-	-	-	-	-	-	-	-	-	-	-	-	-	-	-	-	-	-	38.36	7.42	0.8677
	JS-NGO-09s	NGO-HM3	125-250	77	170	100	40	85000	-	-	-	-	-	-	-	-	-	-	-	-	-	-	-	-	-	-	-	-	-	-	yes	-	-	-	-	-	-	-	-	-	-	-	-	-	-	-	38.25	6.38	0.8704
	JS-NGO-09s	NGO-HM3	125-250	78	380	290	40	551000	-	-	-	-	-	-	-	-	-	-	-	-	-	-	-	-	-	-	-	-	-	-	yes	-	-	-	-	-	-	-	-	-	-	-	-	-	-	-	39.12	9.42	0.8862
	JS-NGO-09s	NGO-HM3	125-250	79	190	150	40	142500	-	-	-	-	-	-	-	-	-	-	-	-	-	-	-	-	-	-	-	-	-	-	yes	-	-	-	-	-	-	-	-	-	-	-	-	-	-	-	38.84	8.58	0.9271
	JS-NGO-09s	NGO-HM3	125-250	80	200	220	40	220000	-	-	-	-	-	-	-	-	-	-	-	-	-	-	-	-	-	-	-	-	-	-	-	-	-	-	-	-	-	yes	-	-	-	-	yes	-	yes	carbonate + CO2	37.83	4.96	1.76
	JS-NGO-09s	NGO-HM3	125-250	81	220	150	40	165000	-	-	-	-	-	yes	-	-	-	-	-	-	-	-	-	-	-	-	-	-	-	-	yes	-	-	-	-	-	-	-	-	-	-	-	-	-	-	-	38.96	8.46	0.8807
	JS-NGO-09s	NGO-HM3	125-250	82	130	140	40	91000	-	-	-	-	-	-	-	-	-	-	-	-	-	-	-	-	-	-	-	-	-	-	-	-	-	-	yes	-	-	-	-	-	-	-	-	-	-	-	38.45	7.95	0.875
	JS-NGO-09s	NGO-HM3	125-250	83	240	200	40	240000	-	-	-	yes	-	-	-	-	-	-	-	-	-	-	-	-	-	-	-	-	-	-	yes	-	-	-	-	-	-	-	-	-	-	-	-	-	-	-	39.05	9.77	0.7169
	JS-NGO-09s	NGO-HM3	125-250	84	140	200	60	210000	yes	-	-	-	-	-	-	-	-	-	-	-	-	-	-	-	-	-	-	-	-	-	-	-	-	-	-	-	-	-	-	-	-	-	-	-	-	-	38.85	8.5	3.99
	JS-NGO-09s	NGO-HM3	125-250	85	170	120	40	102000	-	-	-	-	-	-	-	-	-	-	-	-	-	-	-	-	-	-	-	-	-	-	yes	-	-	-	-	-	-	-	-	-	-	-	-	-	-	-	38.01	6.7	1.2518
	JS-NGO-09s	NGO-HM3	125-250	86	190	130	40	123500	-	-	-	-	-	-	-	-	-	-	-	-	-	-	-	-	-	-	-	-	-	-	yes	-	-	-	-	-	-	-	-	-	-	-	-	-	-	-	38.29	7.22	0.9231
	JS-NGO-09s	NGO-HM3	125-250	87	110	100	40	55000	-	-	-	-	-	-	-	-	-	-	-	-	-	-	-	-	-	-	-	-	-	-	yes	-	-	-	-	-	-	-	-	-	-	-	-	-	-	-	38.75	9.12	0.8947
	JS-NGO-09s	NGO-HM3	125-250	88	160	120	40	96000	yes	-	-	-	-	-	-	-	-	-	-	-	-	-	-	-	-	-	-	-	-	-	-	-	-	-	-	-	-	-	-	-	-	-	-	-	-	-	37.56	1.8	7.82
	JS-NGO-09s	NGO-HM3	125-250	89	150	140	40	105000	-	-	-	-	-	-	-	-	-	-	-	yes	-	-	-	-	-	-	-	-	-	-	-	-	-	-	-	-	-	-	-	-	-	-	-	-	-	-	38.87	8.7	0.9028
	JS-NGO-09s	NGO-HM3	125-250	90	150	260	40	195000	-	-	-	-	-	-	-	-	-	-	-	-	-	-	-	-	-	-	-	-	-	-	yes	-	-	-	-	-	-	-	-	-	-	-	-	-	-	-	38.48	7.72	0.8585
	JS-NGO-09s	NGO-HM3	125-250	91	140	350	40	245000	yes	-	-	-	-	-	-	-	-	-	-	-	-	-	-	-	-	-	-	-	-	-	-	-	-	-	yes	-	-	-	-	-	-	yes	-	-	-	-	38.58	8.04	0.8855
	JS-NGO-09s	NGO-HM3	125-250	92	190	180	40	171000	-	-	-	yes	-	-	-	-	-	-	-	-	-	-	-	-	-	-	-	-	-	-	-	-	-	-	-	-	-	-	-	-	-	-	-	-	-	-	38.42	7.22	0.9403
	JS-NGO-09s	NGO-HM3	125-250	93	140	260	40	182000	-	-	-	yes	-	-	-	-	-	-	-	-	-	-	-	-	-	-	-	-	-	-	-	-	-	-	-	-	-	-	-	-	-	-	-	-	-	-	38.91	8.94	0.8524
	JS-NGO-09s	NGO-HM3	125-250	94	170	370	40	314500	-	-	-	-	-	-	-	-	-	-	-	-	-	-	-	-	-	-	-	-	-	-	yes	-	-	-	-	-	-	-	-	-	-	-	-	-	-	-	38.64	7.61	0.8094
	JS-NGO-09s	NGO-HM3	125-250	95	160	130	40	104000	-	-	-	-	-	-	-	-	-	-	-	-	-	-	-	-	-	-	-	-	-	-	-	yes	-	-	-	-	-	-	-	-	-	-	-	-	-	-	39.14	8.97	0.8938
	JS-NGO-09s	NGO-HM3	125-250	97	280	280	40	392000	-	-	-	-	-	-	-	-	-	-	-	-	-	-	-	-	-	-	-	-	-	-	yes	-	-	-	-	-	-	-	-	-	-	-	-	-	-	-	38.89	7.89	0.8078
	JS-NGO-09s	NGO-HM3	125-250	98	200	180	40	180000	yes	-	-	-	-	-	-	-	-	-	-	-	-	-	-	-	-	-	-	-	-	-	-	-	-	-	-	-	-	-	-	-	-	-	-	-	-	-	38.04	4.2	2.95
	JS-NGO-09s	NGO-HM3	125-250	99	260	200	40	260000	-	-	-	yes	-	yes	-	-	-	-	-	-	-	-	-	-	-	-	-	-	-	-	yes	-	-	-	-	-	-	-	-	-	-	-	-	-	-	-	38.98	8.78	0.9067
	JS-NGO-09s	NGO-HM3	125-250	100	140	160	40	112000	-	-	-	-	-	-	-	yes	-	-	-	-	-	-	-	-	-	-	-	-	-	-	-	-	-	-	-	-	-	-	-	-	-	-	-	-	-	-	38.76	7.79	1.0251
	JS-NGO-09s	NGO-HM3	125-250	101	170	100	40	85000	yes	-	-	-	-	-	-	-	-	-	-	-	-	-	-	-	-	-	-	-	-	-	-	-	-	-	-	-	-	-	-	-	-	-	-	-	-	-	38.82	8.42	0.879
	JS-NGO-09s	NGO-HM3	125-250	102	180	180	40	162000	-	-	-	-	-	-	-	-	-	-	-	-	-	-	-	-	-	-	-	-	-	-	yes	-	-	-	-	-	-	-	-	-	-	-	-	-	-	-	38.82	8.37	0.8834
	JS-NGO-09s	JS-NGO-09s_250-500_1st	250-500	1	350	300	40	525000	yes	-	-	-	-	-	-	-	-	-	-	-	-	-	-	-	-	-	-	-	-	-	-	-	-	-	-	-	-	-	-	-	-	yes	-	-	-	-	37.84	6.74	0.9271
	JS-NGO-09s	JS-NGO-09s_250-500_1st	250-500	2	650	200	40	650000	-	-	-	yes	-	-	-	-	-	-	-	-	-	yes	-	-	-	-	-	-	-	-	yes	-	-	-	-	-	-	-	-	-	-	-	-	-	-	phlogopite-biotite + rutile	38.2	7.73	0.8344
	JS-NGO-09s	JS-NGO-09s_250-500_1st	250-500	3	410	250	40	512500	yes	-	-	-	-	-	-	-	-	-	-	-	-	-	-	-	-	-	-	-	-	-	-	-	-	-	-	-	-	-	-	-	-	-	-	-	-	-	38.08	6.45	2.25
	JS-NGO-09s	JS-NGO-09s_250-500_1st	250-500	4	250	290	40	362500	yes	-	-	-	-	-	-	-	-	-	-	-	-	-	-	-	-	-	-	-	-	-	-	-	-	-	-	-	-	-	-	-	-	yes	-	-	-	-	38.35	8.01	0.9255
	JS-NGO-09s	JS-NGO-09s_250-500_1st	250-500	5	600	450	40	1350000	-	-	-	yes	-	-	-	-	-	-	-	-	-	-	-	-	-	-	-	-	-	-	yes	-	-	-	-	-	-	-	-	-	-	-	-	-	-	-	38.72	8.55	0.9644
	JS-NGO-09s	JS-NGO-09s_250-500_1st	250-500	6	300	120	40	180000	-	-	-	-	-	-	-	-	-	-	-	-	-	-	-	-	-	-	-	-	-	-	-	-	-	-	yes	-	-	-	-	-	-	-	-	-	-	-	38.79	9.1	0.9733
	JS-NGO-09s	JS-NGO-09s_250-500_1st	250-500	7	420	200	40	420000	yes	-	-	yes	-	-	-	-	-	-	-	-	-	-	-	-	-	-	-	-	-	-	-	-	-	-	-	-	-	-	-	-	-	-	-	-	-	-	38.63	8.7	0.8703
	JS-NGO-09s	JS-NGO-09s_250-500_1st	250-500	8	290	390	40	565500	yes	-	-	-	-	-	-	-	-	-	-	-	-	-	-	-	-	-	-	-	-	-	-	-	-	-	-	-	-	-	-	-	-	-	-	-	-	-	38.31	7.11	1.2961
	JS-NGO-09s	JS-NGO-09s_250-500_1st	250-500	9	330	180	40	297000	-	-	-	-	-	-	-	-	-	-	-	-	-	-	-	-	-	-	-	-	-	-	-	yes	-	-	-	-	-	-	-	-	-	-	-	-	-	-	38.27	7.72	0.872
	JS-NGO-09s	JS-NGO-09s_250-500_1st	250-500	10	480	260	40	624000	-	-	-	yes	-	-	-	-	-	-	-	-	-	-	-	-	-	-	-	-	-	-	-	-	-	-	-	-	-	-	-	-	-	-	-	-	-	-	38.65	8.2	0.8016
	JS-NGO-09s	JS-NGO-09s_250-500_1st	250-500	11	320	220	40	352000	-	-	-	-	-	-	-	-	-	-	-	-	-	-	-	-	-	-	-	-	-	-	yes	-	-	-	-	-	-	-	-	-	-	-	-	-	-	-	38.8	8.47	0.885
	JS-NGO-09s	JS-NGO-09s_250-500_1st	250-500	12	160	330	40	264000	-	-	-	-	-	-	-	-	-	-	-	-	-	-	-	-	-	-	yes	-	-	-	-	-	-	-	yes	-	-	-	-	-	-	-	-	-	-	-	38.17	6.12	1.1711
	JS-NGO-09s	JS-NGO-09s_250-500_1st	250-500	13	270	360	40	486000	-	-	-	-	-	-	-	-	-	-	-	-	-	-	-	-	-	-	-	-	-	-	-	yes	-	-	yes	-	-	-	-	-	-	-	-	-	-	-	38.92	8.96	1.0168
	JS-NGO-09s	JS-NGO-09s_250-500_1st	250-500	14	300	230	40	345000	-	-	-	yes	-	-	-	-	-	-	-	-	-	-	-	-	-	-	-	-	-	-	yes	-	-	-	-	-	-	-	-	-	-	-	-	-	-	-	38.62	8.44	0.8947
	JS-NGO-09s	JS-NGO-09s_250-500_1st	250-500	15	380	270	40	513000	-	-	-	-	-	-	-	-	-	-	-	-	-	-	-	-	-	-	-	-	-	-	-	-	-	-	yes	-	-	-	-	-	-	-	-	-	-	-	38.3	7.5	0.8198
	JS-NGO-09s	JS-NGO-09s_250-500_1st	250-500	16	210	300	40	315000	-	-	-	-	-	-	-	-	-	-	-	-	-	-	-	-	-	-	-	-	-	-	yes	yes	-	-	yes	-	-	-	-	-	-	-	-	-	-	-	38.95	9.74	1.3035
	JS-NGO-09s	JS-NGO-09s_250-500_1st	250-500	17	230	360	40	414000	-	-	-	yes	-	yes	-	-	-	-	-	-	-	-	-	-	-	-	-	-	-	-	yes	-	-	-	-	-	-	-	-	-	-	-	-	-	-	-	38.47	7.97	0.8115
	JS-NGO-09s	JS-NGO-09s_250-500_1st	250-500	18	220	580	40	638000	yes	-	-	yes	-	-	-	-	-	-	-	-	yes	-	-	-	-	-	-	-	-	-	-	-	-	-	-	-	-	-	-	-	-	-	-	-	-	-	38.19	7.2	0.9284
	JS-NGO-09s	JS-NGO-09s_250-500_1st	250-500	19	540	370	40	999000	yes	-	-	-	-	-	-	-	-	-	-	yes	-	yes	-	-	-	-	-	-	-	-	yes	-	-	-	yes	-	-	-	-	-	-	-	-	yes	-	-	38.52	9.12	0.907
	JS-NGO-09s	JS-NGO-09s_250-500_1st	250-500	20	340	280	40	476000	-	-	-	-	-	-	-	-	-	-	-	yes	-	-	-	-	-	-	-	-	-	-	-	-	-	-	-	-	-	-	-	-	-	-	-	-	-	-	38.32	7.59	0.9019
	JS-NGO-09s	JS-NGO-09s_250-500_1st	250-500	21	540	200	40	540000	yes	-	-	-	-	-	-	-	-	-	-	-	-	yes	-	-	-	-	-	-	-	-	yes	-	-	-	-	-	-	-	-	-	-	yes	-	-	-	-	38.02	7.2	0.9615
	JS-NGO-09s	JS-NGO-09s_250-500_1st	250-500	22	240	380	40	456000	-	-	-	-	-	-	-	-	-	-	-	-	-	-	-	-	-	-	-	-	-	-	yes	-	-	-	-	-	-	-	-	-	-	-	-	-	-	-	38.43	7.86	0.9374
	JS-NGO-09s	JS-NGO-09s_250-500_1st	250-500	23	240	280	40	336000	-	-	-	-	-	-	-	-	-	-	-	-	-	-	-	-	-	-	-	-	-	-	yes	-	-	-	-	-	-	-	-	-	-	-	-	-	-	-	38.11	7.76	0.9679
	JS-NGO-09s	JS-NGO-09s_250-500_1st	250-500	24	260	460	40	598000	-	-	-	-	-	-	-	-	-	-	-	-	-	-	-	-	-	-	-	-	-	-	yes	-	-	-	-	-	-	-	-	-	-	-	-	-	-	-	38.42	8.39	1.0154
	JS-NGO-09s	JS-NGO-09s_250-500_1st	250-500	25	360	250	40	450000	yes	-	-	-	-	-	-	-	-	-	-	-	-	-	-	-	-	-	-	-	-	-	-	yes	-	-	-	-	-	-	-	-	-	-	-	-	-	-	38.12	7.24	2.1
	JS-NGO-09s	JS-NGO-09s_250-500_1st	250-500	26	490	280	40	686000	yes	-	-	-	-	-	-	-	-	-	-	-	-	-	-	-	-	-	-	-	-	-	-	-	-	-	yes	-	-	-	-	-	-	-	-	-	-	-	38.53	8.34	2.11
	JS-NGO-09s	JS-NGO-09s_250-500_1st	250-500	27	610	200	40	610000	-	-	-	yes	-	-	-	-	-	-	-	-	-	-	-	-	-	-	-	-	-	-	-	-	-	-	-	-	-	-	-	-	-	-	-	-	-	-	38.43	7.82	1.56
	JS-NGO-09s	JS-NGO-09s_250-500_1st	250-500	28	410	310	40	635500	yes	-	-	-	-	-	-	-	-	-	-	-	-	-	-	yes	-	-	-	-	-	-	-	-	-	-	-	-	-	-	-	-	-	-	-	-	-	-	37.73	6.45	0.9069
	JS-NGO-09s	JS-NGO-09s_250-500_1st	250-500	29	270	660	40	891000	-	-	-	yes	-	-	-	-	-	-	-	-	-	-	-	-	-	-	-	-	-	-	yes	-	-	-	-	-	-	-	-	-	-	-	-	-	-	-	38.51	8.32	0.8618
	JS-NGO-09s	JS-NGO-09s_250-500_1st	250-500	30	290	250	40	362500	-	-	-	yes	-	yes	-	-	-	-	-	-	-	-	-	-	-	-	-	-	-	-	-	-	-	-	-	-	-	-	-	-	-	-	-	-	-	-	38.75	9.19	2.72
	JS-NGO-09s	JS-NGO-09s_250-500_1st	250-500	31	400	400	40	800000	-	-	-	-	-	-	-	-	-	-	-	-	-	-	-	-	-	-	-	-	-	-	yes	-	-	-	-	-	-	-	-	-	-	-	-	-	-	-	38.29	8.64	0.9462
	JS-NGO-09s	JS-NGO-09s_250-500_1st	250-500	32	250	320	40	400000	yes	-	-	-	-	-	-	-	-	-	-	-	-	-	-	-	-	-	-	-	-	-	yes	-	-	-	-	-	-	-	-	-	-	-	-	-	-	-	38.52	8.45	0.8609
	JS-NGO-09s	JS-NGO-09s_250-500_1st	250-500	33	420	330	40	693000	-	-	-	-	-	yes	-	-	-	-	-	yes	-	-	-	-	-	-	-	-	-	-	yes	-	-	-	yes	-	-	-	-	-	-	-	-	-	-	-	38.6	8.62	0.8557
	JS-NGO-09s	JS-NGO-09s_250-500_1st	250-500	34	370	460	40	851000	-	-	-	-	yes	-	-	-	-	-	-	yes	-	yes	-	-	-	-	-	-	-	-	-	-	-	-	-	-	-	-	-	-	-	-	-	-	-	phlogopite-biotite + graphite	38.17	8.32	0.9607
	JS-NGO-09s	JS-NGO-09s_250-500_1st	250-500	35	240	410	40	492000	-	-	-	-	-	-	-	-	-	-	-	-	-	-	-	-	-	-	-	-	-	-	yes	-	-	-	-	-	-	-	-	-	-	-	-	-	-	-	38.28	8.41	0.9227
	JS-NGO-09s	JS-NGO-09s_250-500_1st	250-500	36	380	330	40	627000	-	-	-	-	yes	-	-	-	-	-	-	-	-	-	-	-	-	-	-	-	-	-	-	-	-	-	-	-	-	yes	-	-	-	-	-	-	-	-	37.92	6.97	0.9043
	JS-NGO-09s	JS-NGO-09s_250-500_1st	250-500	37	500	250	40	625000	yes	-	-	-	-	-	-	-	-	-	-	-	-	-	-	-	-	-	-	-	-	-	-	-	-	-	-	-	-	-	-	-	-	-	-	-	-	-	38.47	8.91	1.86
	JS-NGO-09s	JS-NGO-09s_250-500_1st	250-500	38	410	380	40	779000	-	-	-	-	yes	-	-	-	-	-	-	-	-	-	-	-	-	-	-	-	-	-	yes	-	-	-	-	-	-	-	-	-	-	-	-	-	-	-	38.5	7.65	0.8412
	JS-NGO-09s	JS-NGO-09s_250-500_1st	250-500	39	390	620	40	1209000	yes	-	-	-	-	-	-	-	-	-	-	-	-	-	-	-	-	-	-	-	-	-	-	-	-	-	-	-	-	-	-	-	-	-	-	-	-	-	37.92	7.1	1.039
	JS-NGO-09s	JS-NGO-09s_250-500_1st	250-500	40	340	440	40	748000	-	-	-	-	-	-	-	-	-	-	-	-	-	-	-	-	-	-	-	-	-	-	yes	-	-	-	yes	-	-	-	-	-	-	-	-	-	-	-	38.17	7.68	0.8018
	JS-NGO-09s	JS-NGO-09s_250-500_1st	250-500	41	320	330	40	528000	-	-	-	-	-	-	-	-	-	-	-	-	-	-	-	yes	-	-	-	-	-	-	yes	-	-	-	-	-	-	-	-	-	-	yes	-	-	-	-	37.56	5.42	1.1796
	JS-NGO-09s	JS-NGO-09s_250-500_1st	250-500	42	310	370	40	573500	yes	-	-	-	-	-	-	-	-	-	-	-	-	-	-	-	-	-	-	-	-	-	yes	-	-	-	-	-	-	-	-	-	-	-	-	-	-	-	37.71	6.44	0.8944
	JS-NGO-09s	JS-NGO-09s_250-500_1st	250-500	43	360	390	40	702000	-	-	-	-	-	-	-	-	-	-	-	-	-	-	-	-	-	-	-	-	-	-	yes	-	-	-	-	-	-	-	-	-	-	-	-	-	-	-	38.37	8.47	0.9126
	JS-NGO-09s	JS-NGO-09s_250-500_1st	250-500	44	580	330	40	957000	yes	-	-	-	-	-	-	-	-	-	-	-	-	yes	-	-	-	-	-	-	-	-	yes	-	-	-	-	-	yes	-	-	-	-	-	-	-	-	-	38.15	6.99	0.8673
	JS-NGO-09s	JS-NGO-09s_250-500_1st	250-500	45	390	320	40	624000	-	-	-	yes	-	-	-	-	-	-	-	-	-	-	-	-	-	-	-	-	-	-	yes	-	-	-	-	-	-	-	-	-	-	-	-	-	-	-	38.03	6.4	0.914
	JS-NGO-09s	JS-NGO-09s_250-500_1st	250-500	46	290	190	40	275500	yes	-	-	yes	-	-	-	-	-	-	-	-	-	-	-	-	-	-	-	-	-	-	-	-	-	-	-	-	-	-	-	-	-	-	-	-	-	-	38.67	9.01	0.8997
	JS-NGO-09s	JS-NGO-09s_250-500_1st	250-500	47	440	200	40	440000	-	-	-	-	-	-	-	-	-	-	-	yes	-	-	-	yes	-	-	-	-	-	-	-	-	-	-	-	-	-	yes	-	-	-	yes	-	-	-	sphalerite	38.03	7.47	0.8847
	JS-NGO-09s	JS-NGO-09s_250-500_1st	250-500	48	300	250	40	375000	-	-	-	-	-	-	-	-	-	-	-	-	-	-	-	-	-	-	-	-	-	-	-	-	-	-	-	-	-	yes	-	-	-	-	-	-	-	carbonate + CO2	38.58	8.72	1.3073
	JS-NGO-09s	JS-NGO-09s_250-500_1st	250-500	49	250	120	20	75000	-	-	-	yes	-	-	-	-	-	-	-	yes	-	-	-	-	-	-	-	-	-	-	-	-	-	-	yes	yes	-	-	-	-	-	-	-	-	-	-	38.1	7.28	0.8757
	JS-NGO-09s	JS-NGO-09s_250-500_1st	250-500	50	280	300	40	420000	yes	-	-	-	-	-	-	-	-	-	-	-	-	-	-	-	-	-	-	-	-	-	yes	-	-	-	-	-	-	-	-	-	-	-	-	-	-	-	38.19	8.25	0.882
	JS-NGO-09s	JS-NGO-09s_250-500_1st	250-500	51	350	560	40	980000	-	-	-	-	-	-	-	-	-	-	-	-	-	-	-	-	-	-	-	-	-	-	yes	-	-	-	-	-	-	-	-	-	-	-	-	-	-	-	38.44	8.14	0.9157
	JS-NGO-09s	JS-NGO-09s_250-500_1st	250-500	52	280	450	40	630000	-	-	-	-	-	-	-	-	-	-	-	yes	-	-	-	-	-	-	-	-	-	-	-	-	-	-	-	-	-	-	-	-	-	-	-	-	-	-	37.99	5.67	3.14
	JS-NGO-09s	JS-NGO-09s_250-500_1st	250-500	53	380	1300	40	2470000	yes	yes	yes	-	-	-	-	-	-	yes	-	-	-	yes	-	-	-	-	yes	-	-	-	-	-	-	-	-	-	yes	yes	-	-	-	yes	-	-	-	cordierite, kokchetavite + tridymite + phlogopite-biotite	38.63	9.08	0.9516
	JS-NGO-09s	JS-NGO-09s_250-500_1st	250-500	54	300	420	40	630000	yes	-	-	yes	-	-	-	-	-	-	-	-	-	-	-	-	-	-	-	-	-	-	-	-	-	-	-	-	-	-	-	-	-	-	-	-	-	-	38.28	7.38	1.45
	JS-NGO-09s	JS-NGO-09s_250-500_1st	250-500	55	370	500	40	925000	-	-	-	-	-	-	-	-	-	-	-	-	-	-	-	-	-	-	-	-	-	-	-	-	-	-	yes	-	-	-	-	-	-	-	-	-	-	-	38.49	7.59	0.9044
	JS-NGO-09s	JS-NGO-09s_250-500_1st	250-500	56	330	240	40	396000	-	-	-	yes	-	-	-	-	-	-	-	-	-	-	-	-	-	-	-	-	-	-	yes	-	-	-	-	-	-	-	-	-	-	-	-	-	-	-	38.62	8.39	0.8808
	JS-NGO-09s	JS-NGO-09s_250-500_1st	250-500	57	380	220	40	418000	-	-	-	yes	-	-	-	-	-	-	-	-	-	-	-	-	-	-	-	-	-	-	yes	-	-	-	-	-	-	-	-	-	-	-	-	-	-	-	38.72	8.74	0.9481
	JS-NGO-09s	JS-NGO-09s_250-500_1st	250-500	58	530	520	40	1378000	yes	-	-	-	-	-	-	-	-	-	-	-	-	-	yes	-	-	-	-	-	-	-	-	-	-	-	-	-	-	yes	yes	-	-	-	-	-	yes	carbonate + pyrophyllite + CO2	38.56	8.01	1.75
	JS-NGO-09s	JS-NGO-09s_250-500_1st	250-500	59	270	290	40	391500	yes	-	-	-	-	-	-	-	-	-	-	-	-	yes	-	-	-	-	-	-	-	-	-	-	-	-	-	-	-	-	-	-	-	-	-	-	-	-	37.68	5.6	1.77
	JS-NGO-09s	JS-NGO-09s_250-500_1st	250-500	60	480	220	40	528000	-	-	-	-	-	-	-	-	-	-	-	yes	-	-	-	-	-	-	-	-	-	-	-	-	-	-	-	-	-	-	-	-	-	-	-	-	-	-	38.08	7.53	0.9458
	JS-NGO-09s	JS-NGO-09s_250-500_1st	250-500	61	220	280	40	308000	-	-	-	-	-	-	-	-	-	-	-	yes	-	-	-	-	-	-	-	-	-	-	yes	-	-	-	-	-	-	-	-	-	-	-	-	-	-	-	38.11	8.06	0.9029
	JS-NGO-09s	JS-NGO-09s_250-500_1st	250-500	62	510	460	40	1173000	yes	-	-	-	-	-	-	-	-	-	-	yes	-	-	yes	yes	-	-	-	-	-	-	-	-	-	-	-	-	-	yes	yes	-	-	-	-	-	yes	carbonate + quartz + graphite + pyrophyllite + chamosite-clinochlore + apatite	37.82	6.04	2.43
	JS-NGO-09s	JS-NGO-09s_250-500_1st	250-500	63	380	320	40	608000	-	-	-	-	-	-	-	-	-	-	-	-	-	-	-	-	-	-	-	-	-	-	yes	-	-	-	-	-	-	-	-	-	-	-	-	-	-	-	38.15	7.3	0.9714
	JS-NGO-09s	JS-NGO-09s_250-500_1st	250-500	64	240	550	40	660000	-	-	-	-	yes	-	-	-	-	-	-	-	-	-	-	-	-	-	-	-	-	-	-	-	-	-	-	-	yes	-	-	-	-	-	-	-	-	-	37.97	7.19	0.9645
	JS-NGO-09s	JS-NGO-09s_250-500_1st	250-500	65	230	320	40	368000	-	-	-	-	-	-	-	-	-	-	-	yes	-	-	-	-	-	-	-	-	-	-	-	-	-	-	yes	-	-	-	-	-	-	yes	-	-	-	-	37.99	7.93	0.9369
	JS-NGO-09s	JS-NGO-09s_250-500_1st	250-500	66	170	130	40	110500	-	-	-	-	-	-	-	-	-	-	-	-	-	-	-	-	-	-	-	-	-	-	yes	-	-	-	-	yes	-	-	-	-	-	-	-	-	-	-	38.4	8.58	0.9088
	JS-NGO-09s	JS-NGO-09s_250-500_1st	250-500	67	330	140	40	231000	-	-	-	yes	-	-	-	-	-	-	-	-	-	-	-	-	-	-	-	-	-	-	yes	-	-	-	-	-	-	-	-	-	-	-	-	-	-	-	38.48	8.56	0.8852
	JS-NGO-09s	JS-NGO-09s_250-500_1st	250-500	68	260	250	40	325000	-	-	-	-	yes	-	-	-	-	-	-	-	-	-	-	-	-	-	-	-	-	-	-	-	-	-	-	-	-	yes	-	-	-	-	-	-	-	-	37.1	2.5	7.64
	JS-NGO-09s	JS-NGO-09s_250-500_1st	250-500	69	280	520	40	728000	-	-	-	yes	-	-	-	-	-	-	-	-	-	-	-	-	-	-	-	-	-	-	-	-	-	-	yes	-	-	-	-	-	-	-	-	-	-	-	38.52	9.11	0.937
	JS-NGO-09s	JS-NGO-09s_250-500_1st	250-500	70	320	270	40	432000	yes	-	-	-	-	-	-	-	-	-	-	-	-	-	-	-	-	-	-	-	-	-	-	-	-	-	-	-	-	-	-	-	-	-	-	-	-	-	37.87	6.55	0.8766
	JS-NGO-09s	JS-NGO-09s_250-500_1st	250-500	71	330	370	40	610500	yes	-	-	-	-	-	-	-	-	-	-	yes	-	yes	-	-	-	-	-	-	-	-	-	-	-	-	-	-	-	-	-	-	-	-	-	yes	-	-	38.44	8.65	0.8575
	JS-NGO-09s	JS-NGO-09s_250-500_1st	250-500	72	360	460	40	828000	yes	yes	-	-	-	-	-	-	-	-	-	-	yes	-	-	-	-	-	-	-	-	-	-	-	-	-	yes	-	-	-	-	-	-	-	-	-	-	cristobalite + muscovite-paragonite	38.16	6.4	2.98
	JS-NGO-09s	JS-NGO-09s_250-500_1st	250-500	73	450	1000	40	2250000	-	-	-	-	-	-	-	-	-	-	-	-	-	-	-	-	-	-	-	-	-	-	yes	-	-	-	yes	-	-	-	-	-	-	-	-	-	-	-	38.78	8.65	1.1195
	JS-NGO-09s	JS-NGO-09s_250-500_2nd	250-500	74	480	500	36	1080000	-	-	-	-	-	yes	-	-	-	-	-	-	-	-	-	-	-	-	-	-	-	-	yes	-	-	-	-	-	-	-	-	-	-	-	-	-	-	-	38.3	8.94	0.8712
	JS-NGO-09s	JS-NGO-09s_250-500_2nd	250-500	75	440	410	40	902000	yes	-	-	-	-	-	-	-	-	-	-	-	-	-	-	-	-	-	-	-	-	-	-	-	-	-	yes	-	-	-	-	-	-	-	-	-	-	-	38.24	7.36	1.58
	JS-NGO-09s	JS-NGO-09s_250-500_2nd	250-500	76	200	470	40	470000	-	-	-	yes	-	yes	-	-	-	-	-	-	-	-	-	-	-	-	-	-	-	-	yes	-	-	-	-	-	-	-	-	-	-	-	-	-	-	-	38.04	8.58	0.8918
	JS-NGO-09s	JS-NGO-09s_250-500_2nd	250-500	77	190	400	40	380000	-	-	-	yes	-	-	-	-	-	-	-	-	-	-	-	-	-	-	-	-	-	-	yes	-	-	-	-	-	-	-	-	-	-	-	-	-	-	-	38.2	7.81	0.9475
	JS-NGO-09s	JS-NGO-09s_250-500_2nd	250-500	78	450	350	40	787500	-	-	-	yes	-	-	-	-	-	-	-	-	-	-	-	-	-	-	-	-	-	-	yes	-	-	-	-	-	-	-	-	-	-	-	-	-	-	-	38.24	8.7	0.9011
	JS-NGO-09s	JS-NGO-09s_250-500_2nd	250-500	79	330	420	40	693000	-	-	-	-	-	-	-	-	yes	-	-	-	yes	-	-	-	-	-	-	-	-	-	-	-	-	-	-	-	-	-	-	-	-	-	-	-	-	plagioclase + muscovite-paragonite	37.57	3.16	8.87
	JS-NGO-09s	JS-NGO-09s_250-500_2nd	250-500	80	290	320	40	464000	yes	-	-	-	-	-	-	-	-	-	-	-	-	-	-	-	-	-	-	-	-	-	yes	-	-	-	-	-	-	-	-	-	-	-	-	-	-	-	38.29	8.45	0.8899
	JS-NGO-09s	JS-NGO-09s_250-500_2nd	250-500	81	300	280	40	420000	-	-	-	-	-	-	-	-	-	-	-	-	-	yes	-	-	-	-	-	-	-	-	yes	-	-	-	-	-	-	-	-	-	-	-	-	-	-	-	38.06	6.79	0.844
	JS-NGO-09s	JS-NGO-09s_250-500_2nd	250-500	82	280	220	40	308000	-	-	-	yes	-	-	-	-	-	-	-	-	-	-	-	yes	-	-	-	-	-	-	-	-	-	-	-	-	-	-	-	-	-	-	-	-	-	-	38.58	8.84	0.9186
	JS-NGO-09s	JS-NGO-09s_250-500_2nd	250-500	83	320	310	40	496000	-	-	-	-	-	yes	-	-	-	-	-	-	-	-	-	-	-	-	-	-	-	-	yes	-	-	-	yes	-	-	-	-	-	-	-	-	-	-	-	38.65	8.94	0.9849
	JS-NGO-09s	JS-NGO-09s_250-500_2nd	250-500	84	440	360	40	792000	yes	-	-	-	-	-	-	-	-	-	-	-	-	-	-	-	-	-	-	-	-	-	-	-	-	-	-	-	-	-	-	-	-	-	-	-	-	-	37.95	3.85	5.85
	JS-NGO-09s	JS-NGO-09s_250-500_2nd	250-500	85	340	600	40	1020000	-	-	-	-	-	-	-	-	-	-	-	-	-	yes	-	-	-	-	-	-	-	-	-	-	-	-	-	-	-	-	-	-	-	-	-	-	-	-	38.5	7.86	0.9062
	JS-NGO-09s	JS-NGO-09s_250-500_2nd	250-500	86	280	450	40	630000	-	-	-	-	-	-	-	-	-	-	-	-	-	-	-	-	-	-	-	-	-	-	yes	-	-	-	yes	-	-	-	-	-	-	-	-	-	-	-	38.16	6.74	0.9435
	JS-NGO-09s	JS-NGO-09s_250-500_2nd	250-500	87	540	360	40	972000	-	-	-	yes	-	-	-	-	-	-	-	-	-	yes	-	-	-	-	-	-	-	-	-	-	-	-	-	-	-	-	-	-	-	-	-	-	-	-	38.76	9.35	1.0207
	JS-NGO-09s	JS-NGO-09s_250-500_2nd	250-500	88	270	490	40	661500	yes	-	-	-	-	-	-	-	-	-	-	-	-	-	-	-	-	-	-	-	-	-	-	-	-	-	-	-	-	-	-	-	-	-	-	-	-	-	37.93	6.75	2.01
	JS-NGO-09s	JS-NGO-09s_250-500_2nd	250-500	89	370	260	40	481000	-	-	-	yes	-	-	-	-	-	-	-	-	-	-	-	-	-	-	-	-	-	-	yes	-	-	-	-	-	-	-	-	-	-	-	-	-	-	-	38.63	8.62	1.0012
	JS-NGO-09s	JS-NGO-09s_250-500_2nd	250-500	90	370	360	40	666000	yes	-	-	-	-	-	-	-	-	-	-	-	-	-	-	-	-	-	-	-	-	-	yes	-	-	-	-	-	-	-	-	-	-	-	-	-	-	-	38.2	7.85	0.9095
	JS-NGO-09s	JS-NGO-09s_250-500_2nd	250-500	91	180	420	40	378000	yes	-	-	-	-	-	-	-	-	-	-	yes	-	-	-	-	-	-	-	-	-	-	-	-	-	-	-	-	-	-	-	-	-	-	-	-	-	-	38.16	7.86	0.7899
	JS-NGO-09s	JS-NGO-09s_250-500_2nd	250-500	92	270	310	40	418500	-	-	-	yes	-	-	-	-	-	-	-	-	-	-	-	-	-	-	-	-	-	-	yes	-	-	-	-	-	-	-	-	-	-	-	-	-	-	-	38.17	8.97	0.7719
	JS-NGO-09s	JS-NGO-09s_250-500_2nd	250-500	93	140	470	40	329000	-	-	-	-	-	-	-	-	-	-	-	-	-	-	-	-	-	-	-	-	-	-	yes	-	-	-	-	-	-	-	-	-	-	-	-	-	-	-	38.02	7.26	0.9691
	JS-NGO-09s	JS-NGO-09s_250-500_2nd	250-500	94	170	160	18	61200	-	-	-	-	-	-	-	-	-	-	-	-	-	-	-	-	-	-	-	-	-	-	yes	-	-	-	-	-	-	-	-	-	-	-	-	-	-	-	38.34	8.57	0.8945
	JS-NGO-09s	JS-NGO-09s_250-500_2nd	250-500	95	410	120	40	246000	-	-	-	yes	-	-	-	-	-	-	-	-	-	-	-	-	-	-	-	-	-	-	yes	-	-	-	-	-	-	-	-	-	-	-	-	-	-	-	38.56	8.5	0.8289
	JS-NGO-09s	JS-NGO-09s_250-500_2nd	250-500	96	360	340	40	612000	yes	-	-	yes	-	yes	-	-	-	-	-	-	-	yes	-	-	-	-	-	-	-	-	yes	-	-	-	-	-	-	-	-	-	-	-	-	yes	-	-	38.45	8.22	0.9162
	JS-NGO-09s	JS-NGO-09s_250-500_2nd	250-500	97	360	260	40	468000	-	-	-	yes	-	-	-	-	-	-	-	-	-	-	-	-	-	-	-	-	-	-	-	-	-	-	-	-	-	-	-	-	-	-	-	-	-	-	37.83	7.24	0.9891
	JS-NGO-09s	JS-NGO-09s_250-500_2nd	250-500	98	600	360	40	1080000	yes	yes	-	yes	-	-	-	-	-	-	-	-	yes	yes	-	-	-	-	-	-	-	-	-	-	-	-	-	-	yes	-	yes	-	-	-	-	-	-	cristobalite + phlogopite-biotite + muscovite-paragonite + apatite, quartz + xenotime, quartz + rutile	38.23	9.04	0.8472
	JS-NGO-09s	JS-NGO-09s_250-500_2nd	250-500	99	440	410	40	902000	-	-	-	yes	-	-	-	-	-	-	-	-	-	yes	-	-	-	-	-	-	-	-	-	-	-	-	-	-	-	-	-	-	-	-	-	yes	-	-	38	7.35	0.9228
	JS-NGO-09s	JS-NGO-09s_250-500_2nd	250-500	100	200	340	40	340000	-	-	-	-	-	-	-	-	-	-	-	-	-	-	-	-	-	-	-	-	-	-	yes	-	-	-	-	-	-	-	-	-	-	-	-	-	-	-	38.07	7.96	0.9414
	JS-NGO-11s	NGO-HM1	63-125	1	130	90	40	58500	-	-	-	-	-	-	-	-	-	-	-	-	-	-	-	-	-	-	-	-	-	-	yes	-	-	-	-	-	-	-	-	-	-	-	-	-	-	-	38.56	7.52	0.9348
	JS-NGO-11s	NGO-HM1	63-125	2	80	60	18	10800	yes	-	-	-	-	-	-	-	-	-	-	-	-	-	-	-	-	-	-	-	-	-	-	-	-	-	-	-	-	-	-	-	-	-	-	-	-	-	38.09	6.28	0.8963
	JS-NGO-11s	NGO-HM1	63-125	3	70	80	40	28000	-	-	-	-	-	-	-	-	yes	-	-	-	-	-	-	-	-	-	-	-	-	-	-	-	-	-	-	-	-	-	-	-	-	-	-	-	-	-	38.15	3.07	8.56
	JS-NGO-11s	NGO-HM1	63-125	4	90	80	16	14400	-	-	-	-	-	-	-	-	-	-	-	-	-	-	-	-	-	-	-	-	-	-	yes	-	-	-	-	-	-	-	-	-	-	-	-	-	-	-	39.18	8.75	0.8941
	JS-NGO-11s	NGO-HM1	63-125	5	190	140	38	126350	-	-	-	-	-	-	-	-	-	-	-	-	-	-	-	-	-	-	-	-	-	-	yes	-	-	-	-	-	-	-	-	-	-	-	-	-	-	-	38.59	7.93	1.0174
	JS-NGO-11s	NGO-HM1	63-125	6	60	90	20	13500	-	-	-	-	-	-	-	-	-	-	-	-	-	yes	-	-	-	-	-	-	-	-	-	-	-	-	-	-	-	-	-	-	-	-	-	yes	-	-	38.1	3.87	7.35
	JS-NGO-11s	NGO-HM1	63-125	7	60	70	24	12600	-	-	-	-	-	-	-	-	-	-	-	-	-	-	-	-	-	-	-	-	-	-	-	-	-	-	-	-	-	-	-	-	-	-	-	yes	-	-	38.51	8.8	1.041
	JS-NGO-11s	NGO-HM1	63-125	8	80	110	18	19800	-	-	-	-	-	-	-	-	-	-	-	-	-	-	-	-	-	-	-	-	-	-	yes	-	-	-	-	-	-	-	-	-	-	-	-	-	-	-	38.65	7.29	1.2827
	JS-NGO-11s	NGO-HM1	63-125	9	90	100	20	22500	-	-	-	-	-	-	-	-	-	-	-	-	-	-	yes	-	-	-	-	-	-	-	-	-	-	-	-	-	-	yes	-	-	-	-	yes	-	yes	pyrophyllite + carbonate + opaque	38	3.75	2.49
	JS-NGO-11s	NGO-HM1	63-125	10	140	150	20	52500	yes	-	-	-	-	-	-	-	-	-	-	-	-	-	-	-	-	-	-	-	-	-	-	-	-	-	-	-	-	-	-	-	-	-	-	-	-	-	38.25	4.49	8.45
	JS-NGO-11s	NGO-HM1	63-125	11	80	120	30	36000	-	-	-	-	-	-	-	-	-	-	-	-	-	-	-	-	-	-	-	-	-	-	-	-	-	-	-	-	-	-	-	-	-	-	yes	-	-	-	37.9	2.32	7.42
	JS-NGO-11s	NGO-HM1	63-125	12	80	60	14	8400	yes	-	-	yes	-	-	-	-	-	-	-	-	-	-	-	-	-	-	-	-	-	-	-	-	-	-	-	-	-	-	-	-	-	-	-	-	-	-	38.03	4.94	8.42
	JS-NGO-11s	NGO-HM1	63-125	13	80	120	26	31200	yes	-	-	-	-	-	-	-	-	-	-	-	-	-	-	-	-	-	-	-	-	-	-	-	-	-	-	-	-	-	-	-	-	-	-	-	-	-	38.11	3.68	9.64
	JS-NGO-11s	NGO-HM1	63-125	14	80	80	20	16000	yes	-	-	-	-	-	-	-	-	-	-	-	-	-	-	-	-	-	-	-	-	-	-	-	-	-	-	-	-	-	-	-	-	-	-	-	-	-	38.46	3.25	9.35
	JS-NGO-11s	NGO-HM1	63-125	15	70	90	22	17325	yes	-	-	-	-	-	-	-	-	-	-	-	-	-	-	-	-	-	-	-	-	-	-	-	-	-	-	-	-	-	-	-	-	-	-	-	-	-	38.08	4.34	8.08
	JS-NGO-11s	NGO-HM1	63-125	16	90	90	14	14175	-	-	-	yes	-	-	-	-	-	-	-	-	-	-	-	-	-	-	-	-	-	-	-	-	-	-	-	-	-	-	-	-	-	-	-	-	-	-	39.13	9.66	1.0777
	JS-NGO-11s	NGO-HM1	63-125	17	160	100	32	64000	-	-	-	-	-	-	-	-	-	-	-	-	-	-	-	-	-	-	-	-	-	-	yes	yes	-	-	-	-	-	-	-	-	-	-	-	-	-	-	37.85	5.18	0.7805
	JS-NGO-11s	NGO-HM1	63-125	18	160	80	22	35200	yes	-	-	-	-	-	-	-	-	-	-	-	-	-	-	-	-	-	-	-	-	-	-	-	-	-	-	-	-	-	-	-	-	-	yes	-	-	-	38.03	4.44	1.89
	JS-NGO-11s	NGO-HM1	63-125	19	160	110	20	44000	-	-	-	-	yes	-	-	-	-	-	-	-	-	-	-	yes	-	-	-	-	-	-	-	-	-	-	-	-	-	-	-	-	-	-	-	-	-	-	38.97	8.14	0.8818
	JS-NGO-11s	NGO-HM1	63-125	20	80	90	20	18000	-	-	-	-	-	-	-	-	-	-	-	-	-	-	-	-	-	-	-	-	-	-	yes	-	-	-	-	-	-	-	-	-	-	-	-	-	-	-	38.53	7.54	0.8582
	JS-NGO-11s	NGO-HM1	63-125	21	100	100	28	35000	yes	-	-	-	-	-	-	-	-	-	-	-	-	-	-	-	-	-	-	-	-	-	-	-	-	-	-	-	-	-	-	-	-	-	-	-	-	-	38.11	3.65	7.06
	JS-NGO-11s	NGO-HM1	63-125	22	110	190	40	104500	-	-	-	-	-	-	-	-	-	-	-	-	-	-	-	-	-	-	-	-	-	-	yes	-	-	-	-	-	-	-	-	-	-	-	-	-	-	-	38.81	8.02	0.9809
	JS-NGO-11s	NGO-HM1	63-125	23	60	120	32	28800	yes	-	-	-	-	-	-	-	-	-	-	-	-	-	-	-	-	-	-	-	-	-	-	-	-	-	-	-	-	-	yes	-	-	-	-	-	-	-	38.19	2.84	8.73
	JS-NGO-11s	NGO-HM1	63-125	24	80	110	24	26400	-	-	-	-	-	-	-	-	-	-	-	-	-	-	-	-	-	-	-	-	-	-	yes	-	-	-	-	-	-	-	-	-	-	-	-	-	-	-	38.6	8.19	0.8758
	JS-NGO-11s	NGO-HM1	63-125	25	120	150	36	81000	-	-	-	-	-	-	-	-	-	-	-	yes	-	-	-	-	-	-	-	-	-	-	-	-	-	-	-	-	-	-	yes	-	-	-	yes	-	-	-	37.31	2.42	2.08
	JS-NGO-11s	NGO-HM1	63-125	26	40	60	16	4800	-	-	-	-	-	-	-	-	-	yes	-	-	-	yes	-	-	-	-	-	-	-	-	-	-	-	-	-	-	-	-	-	-	-	-	-	-	-	kokchetavite + phlogopite-biotite	38.74	8.5	0.8671
	JS-NGO-11s	NGO-HM1	63-125	27	80	130	20	26000	-	-	-	yes	-	-	-	-	-	-	-	-	-	-	-	-	-	-	-	-	-	-	-	-	-	-	-	-	-	-	-	-	-	-	-	-	-	-	38.86	7.8	1.6
	JS-NGO-11s	NGO-HM1	63-125	28	90	90	26	26325	yes	-	-	-	-	-	-	-	-	-	-	-	-	-	-	-	-	-	-	-	-	-	-	-	-	-	-	-	-	-	-	-	-	-	-	-	-	-	38.03	3.56	6.98
	JS-NGO-11s	NGO-HM1	63-125	29	90	70	16	12600	-	-	-	-	-	yes	-	-	-	-	-	-	-	-	-	-	-	-	-	-	-	-	-	-	-	-	-	-	-	yes	-	-	-	-	-	-	-	-	38.35	7.66	0.9129
	JS-NGO-11s	NGO-HM1	63-125	30	130	140	22	50050	-	-	-	-	-	-	-	-	-	-	-	-	-	-	-	-	-	-	-	-	-	-	yes	-	-	-	-	-	-	-	-	-	-	-	-	-	-	-	38.7	7.27	1.3418
	JS-NGO-11s	NGO-HM1	63-125	31	70	100	26	22750	-	-	-	-	-	-	-	-	-	-	-	-	-	-	-	-	-	-	-	-	-	-	yes	-	-	-	-	-	-	-	-	-	-	-	-	-	-	-	38.65	7.82	0.8314
	JS-NGO-11s	NGO-HM1	63-125	32	110	120	40	66000	-	-	-	-	-	-	-	-	-	-	-	-	-	yes	-	-	-	-	-	-	-	-	-	-	-	-	-	-	-	-	-	-	-	-	yes	-	-	-	37.95	3.56	6.3
	JS-NGO-11s	NGO-HM1	63-125	33	100	110	36	49500	-	-	-	-	yes	-	-	-	-	-	-	-	-	-	-	-	-	-	-	-	-	-	-	-	-	-	-	-	-	-	-	-	-	-	-	-	-	-	38.3	6.79	1.0187
	JS-NGO-11s	NGO-HM1	63-125	34	80	70	28	19600	-	-	-	-	-	-	-	-	-	-	-	-	-	-	-	-	-	-	-	-	-	-	-	-	-	-	-	-	-	-	-	-	-	-	yes	-	-	-	38.11	3.06	6.56
	JS-NGO-11s	NGO-HM1	63-125	35	80	80	24	19200	-	-	-	-	-	-	-	-	-	-	-	-	-	-	-	-	yes	-	-	-	-	-	-	-	-	-	-	-	-	-	yes	-	-	-	-	-	-	-	38.31	3.63	6.67
	JS-NGO-11s	NGO-HM1	63-125	36	110	70	18	17325	-	-	-	yes	-	-	-	-	-	-	-	-	-	-	-	-	yes	-	yes	-	-	-	-	-	-	-	-	-	-	-	-	-	-	-	-	-	-	-	38.66	6.94	6.72
	JS-NGO-11s	NGO-HM1	63-125	37	130	90	12	17550	-	-	-	yes	-	-	-	-	-	-	-	yes	-	-	-	-	-	-	-	-	-	-	-	-	-	-	-	-	-	yes	-	-	-	-	-	-	-	-	37.93	3.4	6.72
	JS-NGO-11s	NGO-HM1	63-125	38	80	120	40	48000	-	-	-	yes	-	-	-	-	-	-	-	-	-	-	-	-	-	-	-	-	-	-	-	-	-	-	yes	-	-	-	-	-	-	-	-	-	-	-	38.35	8.36	0.5483
	JS-NGO-11s	NGO-HM1	63-125	39	130	90	40	58500	yes	-	-	-	-	-	-	-	-	-	-	-	yes	-	yes	-	-	-	-	-	-	-	-	-	-	-	-	-	-	yes	-	-	-	-	-	-	yes	carbonate + carbonaceous matter + pyrophyllite, carbonate + pyrophyllite + muscovite-paragonite + CO2	38.11	3.14	10.18
	JS-NGO-11s	NGO-HM1	63-125	40	50	50	18	5625	-	-	-	-	-	-	-	-	-	-	-	-	-	-	-	-	-	-	-	-	-	-	yes	-	-	-	-	-	-	-	-	-	-	-	-	-	-	-	39.13	9.82	1.008
	JS-NGO-11s	NGO-HM1	63-125	41	80	70	12	8400	-	-	-	-	-	-	-	-	-	-	-	-	-	-	-	-	-	-	-	-	-	-	yes	-	-	-	-	-	-	-	-	-	-	-	-	-	-	-	38.61	7.15	1.03
	JS-NGO-11s	NGO-HM1	63-125	42	160	130	12	31200	yes	-	-	yes	-	-	-	-	-	-	-	-	-	-	-	-	-	-	-	-	-	-	-	-	-	-	-	-	-	-	yes	-	-	-	-	-	-	-	38.97	9.75	1.91
	JS-NGO-11s	NGO-HM1	63-125	43	80	130	40	52000	yes	-	-	-	-	-	-	-	-	-	-	-	-	-	-	-	-	-	-	-	-	-	-	-	-	-	-	-	-	-	-	-	-	-	-	-	yes	CO2	37.97	2.73	9.06
	JS-NGO-11s	NGO-HM1	63-125	44	70	70	40	24500	-	-	-	-	-	-	-	-	-	-	-	-	-	-	-	-	-	-	-	-	-	-	-	-	-	-	yes	-	-	-	-	-	-	-	-	-	-	-	38.75	8.13	1.094
	JS-NGO-11s	NGO-HM1	63-125	45	130	100	32	52000	-	-	-	yes	-	-	-	-	-	-	-	-	-	-	-	-	-	-	-	-	-	-	-	-	-	-	-	-	-	-	-	-	-	-	-	-	-	-	38.76	8.41	0.9629
	JS-NGO-11s	NGO-HM1	63-125	46	70	90	16	12600	-	-	-	-	-	-	-	-	-	-	-	-	-	-	-	-	-	-	-	-	-	-	yes	-	-	-	-	-	-	-	-	-	-	-	-	-	-	-	38.91	8.55	0.9316
	JS-NGO-11s	NGO-HM1	63-125	47	60	100	32	24000	yes	-	-	-	-	-	-	-	-	-	-	-	-	yes	-	-	-	-	-	-	-	-	-	-	-	-	-	-	-	-	-	-	-	-	-	-	-	-	37.92	5.23	2.02
	JS-NGO-11s	NGO-HM1	63-125	48	110	80	20	22000	yes	-	-	-	-	-	-	-	-	-	-	-	-	-	-	-	-	-	-	-	-	-	-	-	-	-	-	-	-	-	-	-	-	-	-	-	-	-	38.2	4.29	8.7
	JS-NGO-11s	NGO-HM1	63-125	49	80	80	34	27200	-	-	-	-	-	-	-	-	-	-	-	-	-	-	-	-	-	-	-	-	-	-	-	-	-	-	-	-	-	yes	-	-	-	-	-	-	-	carbonate + CO2	37.72	3.68	6.37
	JS-NGO-11s	NGO-HM1	63-125	50	90	80	20	18000	yes	-	-	-	-	-	-	-	-	-	-	-	-	-	-	-	-	-	-	-	-	-	-	-	-	-	-	-	-	-	-	-	-	-	-	-	-	-	38.67	6.35	6.6
	JS-NGO-11s	NGO-HM1	63-125	51	90	50	26	14625	yes	-	-	-	-	-	-	-	-	-	-	-	-	-	-	-	-	-	-	-	-	-	-	-	-	-	-	-	-	-	-	-	-	-	-	-	-	-	38.4	4.8	7.55
	JS-NGO-11s	NGO-HM1	63-125	52	90	110	24	29700	yes	-	-	-	-	-	-	-	-	-	-	-	-	-	-	-	-	-	-	-	-	-	-	-	-	-	-	-	-	-	-	-	-	-	yes	-	-	-	38.18	4.04	7.97
	JS-NGO-11s	NGO-HM1	63-125	53	100	180	14	31500	-	-	-	-	-	-	-	-	-	-	-	-	-	yes	-	-	-	-	-	-	-	-	-	-	-	-	-	-	-	-	-	-	-	-	-	-	-	-	38.26	5.85	1.2714
	JS-NGO-11s	NGO-HM1	63-125	54	130	80	30	39000	-	-	-	-	-	-	-	-	-	-	-	yes	-	-	-	-	-	-	-	-	-	-	yes	-	-	-	-	-	-	-	-	-	-	-	-	-	-	-	38.28	7.27	0.9808
	JS-NGO-11s	NGO-HM1	63-125	55	90	80	30	27000	yes	-	-	-	-	-	-	-	-	-	-	-	-	-	-	-	-	-	-	-	-	-	-	-	-	-	-	-	-	-	-	-	-	-	-	-	-	-	37.83	5.61	1.1306
	JS-NGO-11s	NGO-HM1	63-125	56	120	100	14	21000	-	-	-	-	-	-	-	-	-	-	-	-	-	-	-	-	-	-	-	-	-	-	-	-	-	-	-	-	-	-	-	-	-	yes	-	-	-	-	37.75	2.47	7.32
	JS-NGO-11s	NGO-HM1	63-125	57	100	100	40	50000	-	-	-	-	-	-	-	-	-	-	-	-	-	-	-	-	-	-	-	-	-	-	yes	-	-	-	-	-	-	-	-	-	-	-	-	-	-	-	38.89	8.94	1.1566
	JS-NGO-11s	NGO-HM1	63-125	58	60	160	32	38400	-	-	-	-	-	-	-	-	-	-	-	-	-	yes	-	-	-	-	-	-	-	-	-	-	-	-	-	-	-	-	-	-	-	-	-	yes	-	-	37.52	2.35	8.17
	JS-NGO-11s	NGO-HM1	63-125	59	40	60	6	1800	-	-	-	-	-	-	-	yes	-	-	-	-	-	-	-	-	-	-	-	-	-	-	-	-	-	-	-	-	-	-	-	-	-	-	-	-	-	-	38.36	5.24	6.76
	JS-NGO-11s	NGO-HM1	63-125	60	80	60	34	20400	yes	-	-	-	-	-	-	-	-	-	-	-	-	-	-	-	-	-	yes	-	-	-	-	-	-	-	-	-	-	-	-	-	-	-	-	-	-	-	37.63	2.84	6.86
	JS-NGO-11s	NGO-HM1	63-125	61	60	60	24	10800	yes	-	-	-	-	-	-	-	-	-	-	-	-	-	-	-	yes	-	-	-	-	-	-	-	-	-	-	-	-	-	-	-	-	-	-	-	-	-	38.24	4.84	6.8
	JS-NGO-11s	NGO-HM1	63-125	62	150	100	28	52500	-	-	-	-	-	-	-	-	-	-	-	-	-	yes	-	-	-	-	-	-	-	-	-	-	-	-	-	-	-	-	-	-	-	-	yes	yes	-	CO2	38.68	7.99	1.95
	JS-NGO-11s	NGO-HM1	63-125	63	140	80	32	44800	-	-	-	-	-	-	-	-	-	-	-	-	-	-	-	-	-	-	-	-	-	-	yes	-	-	-	-	-	-	-	-	-	-	-	-	-	-	-	38.34	7.72	1.0571
	JS-NGO-11s	NGO-HM1	63-125	64	90	70	18	14175	yes	-	-	-	-	-	-	-	-	-	-	-	-	-	-	-	-	-	-	-	-	-	-	-	-	-	-	-	-	-	yes	-	-	-	-	-	-	-	37.72	3.27	7.59
	JS-NGO-11s	NGO-HM1	63-125	65	60	90	16	10800	yes	-	-	-	-	-	-	-	-	-	-	-	-	-	-	-	-	-	-	-	-	-	-	-	-	-	-	-	-	-	-	-	-	-	yes	-	-	-	37.95	3.88	7.22
	JS-NGO-11s	NGO-HM1	63-125	66	80	80	20	16000	-	-	-	-	-	-	-	-	-	-	-	-	-	-	-	-	-	-	-	-	-	-	yes	-	-	-	-	-	-	-	-	-	-	-	-	-	-	-	38.21	7.31	0.9282
	JS-NGO-11s	NGO-HM1	63-125	67	70	120	22	23100	-	-	-	yes	-	-	-	-	-	-	-	-	-	-	-	-	-	-	-	-	-	-	-	-	-	-	-	-	-	yes	-	-	-	-	-	-	yes	carbonate + CO2 + carbonaceous matter	38.82	8.67	1.44
	JS-NGO-11s	NGO-HM1	63-125	68	70	80	28	19600	-	-	-	-	-	-	-	-	-	-	-	-	-	-	-	-	-	-	-	-	-	-	-	-	-	-	-	-	-	yes	-	-	-	-	-	-	yes	carbonate + CO2	37.88	4.57	6.64
	JS-NGO-11s	NGO-HM1	63-125	69	120	170	28	71400	-	-	-	-	-	-	-	-	-	-	-	-	-	-	-	-	-	-	-	-	-	-	-	-	-	-	-	-	-	-	-	-	-	-	yes	-	-	-	37.99	3.49	7.08
	JS-NGO-11s	NGO-HM1	63-125	70	60	110	30	24750	-	-	-	yes	-	-	-	-	-	-	-	-	-	-	-	-	-	-	-	-	-	-	-	-	-	-	-	-	-	-	yes	-	-	-	yes	-	-	-	39.26	7.69	9.1
	JS-NGO-11s	NGO-HM1	63-125	71	150	120	36	81000	-	-	-	yes	-	-	-	-	-	-	-	-	-	-	-	-	-	-	-	-	-	-	-	-	-	-	-	-	-	-	-	-	-	-	-	-	-	-	38.16	7.42	1.6
	JS-NGO-11s	NGO-HM1	63-125	72	110	110	40	60500	yes	-	-	-	-	-	-	-	-	-	-	-	-	-	-	-	-	-	-	-	-	-	-	-	-	-	-	-	-	-	-	-	-	-	-	-	-	-	38.69	6.22	6.54
	JS-NGO-11s	NGO-HM1	63-125	73	140	110	28	53900	-	-	-	yes	-	-	-	-	-	-	-	-	-	-	-	-	-	-	-	-	-	-	yes	-	-	-	-	-	-	-	-	-	-	-	-	-	-	rutile + sillimanite	38.67	9.33	0.9705
	JS-NGO-11s	NGO-HM1	63-125	74	50	160	20	20000	-	-	-	-	-	-	-	-	-	-	-	-	-	-	-	-	-	-	-	-	-	-	yes	-	-	-	-	-	-	-	-	-	-	-	-	-	-	-	38.6	8.72	1.49
	JS-NGO-11s	NGO-HM1	63-125	75	130	50	20	16250	-	-	-	-	-	-	-	-	-	-	-	-	-	-	-	-	-	-	-	-	-	-	yes	-	-	-	-	-	-	-	-	-	-	-	-	-	-	-	38.77	8.93	0.8168
	JS-NGO-11s	NGO-HM1	63-125	76	100	80	24	24000	-	-	-	-	-	-	-	-	-	-	-	-	-	-	-	-	-	-	-	-	-	-	-	-	-	-	yes	-	-	-	-	-	-	-	-	-	-	-	37.78	5.51	1.57
	JS-NGO-11s	NGO-HM1	63-125	77	160	120	20	48000	-	-	-	-	-	-	-	-	-	-	-	-	-	-	-	-	-	-	-	-	-	-	yes	-	-	-	-	-	-	-	yes	-	-	-	-	-	-	-	38.47	8.2	0.9714
	JS-NGO-11s	NGO-HM1	63-125	78	100	60	18	13500	-	-	-	yes	-	-	-	-	-	-	-	-	-	-	-	-	-	-	-	-	-	-	-	-	-	-	-	-	-	-	-	-	-	-	-	-	-	-	38.85	10.39	0.7579
	JS-NGO-11s	NGO-HM1	63-125	79	60	90	32	21600	-	-	-	yes	-	-	-	-	yes	-	-	-	-	-	-	-	-	-	-	-	-	-	-	-	-	-	-	-	-	-	-	-	-	-	-	-	-	-	38.64	6.96	6.92
	JS-NGO-11s	JS-NGO-11s_63-125_2nd	63-125	80	80	80	14	11200	yes	-	-	-	-	-	-	-	-	-	-	-	-	-	-	-	yes	-	-	-	-	-	-	-	-	-	-	-	-	-	-	-	-	-	-	-	-	-	38.5	3.9	6.8
	JS-NGO-11s	JS-NGO-11s_63-125_2nd	63-125	81	90	130	20	29250	-	-	-	-	-	-	-	-	-	-	-	-	-	-	-	-	-	-	-	-	-	-	yes	-	-	-	-	-	-	-	-	-	-	-	-	-	-	-	39.06	8.96	0.9104
	JS-NGO-11s	JS-NGO-11s_63-125_2nd	63-125	82	110	90	36	44550	-	-	-	-	-	-	-	-	-	-	-	-	-	yes	-	-	-	-	-	-	-	-	-	-	-	-	-	-	-	-	-	-	-	-	-	yes	-	-	38.67	6.28	2.68
	JS-NGO-11s	JS-NGO-11s_63-125_2nd	63-125	83	140	160	40	112000	-	-	-	-	-	-	-	-	-	-	-	-	-	-	-	-	-	-	-	-	-	-	-	-	-	-	-	-	-	yes	-	-	-	-	-	-	-	-	38.35	3.85	7.23
	JS-NGO-11s	JS-NGO-11s_63-125_2nd	63-125	84	100	140	36	63000	-	-	-	-	-	-	-	-	-	-	-	-	-	-	-	-	-	-	-	-	-	-	yes	-	-	-	-	-	-	-	-	-	-	-	-	-	-	-	39.19	10.28	0.9929
	JS-NGO-11s	JS-NGO-11s_63-125_2nd	63-125	85	100	100	20	25000	-	-	-	-	-	-	-	-	-	-	-	-	-	-	-	-	-	-	-	-	-	-	-	yes	-	-	-	-	-	-	-	-	-	-	-	-	-	-	39.02	8.43	0.9171
	JS-NGO-11s	JS-NGO-11s_63-125_2nd	63-125	86	110	70	20	19250	-	-	-	-	-	-	-	-	-	-	-	-	-	-	-	-	-	-	yes	-	-	-	-	-	-	-	-	-	-	-	-	-	-	-	-	-	-	-	38.45	3.45	7.91
	JS-NGO-11s	JS-NGO-11s_63-125_2nd	63-125	87	80	170	36	61200	-	-	-	-	-	-	-	-	-	-	-	-	-	-	-	-	-	-	-	-	-	-	yes	-	-	-	-	-	-	-	-	-	-	-	-	-	-	-	38.72	9.15	0.7895
	JS-NGO-11s	JS-NGO-11s_63-125_2nd	63-125	88	130	110	22	39325	yes	-	-	-	-	-	-	-	-	-	-	-	-	-	-	-	-	-	-	-	-	-	-	-	-	-	-	-	-	-	-	-	-	-	-	-	-	-	38.68	4.95	7.85
	JS-NGO-11s	JS-NGO-11s_63-125_2nd	63-125	89	70	80	20	14000	-	-	-	-	-	-	-	-	-	-	-	-	-	-	-	-	-	-	yes	-	-	-	-	-	-	-	-	-	-	-	-	-	-	-	-	-	-	-	37.88	3	7.11
	JS-NGO-11s	JS-NGO-11s_63-125_2nd	63-125	90	130	120	34	66300	-	-	-	-	-	-	-	-	-	-	-	-	-	-	-	-	-	-	-	-	-	-	yes	-	-	-	-	-	-	-	-	-	-	-	-	-	-	-	38.88	8.35	0.8267
	JS-NGO-11s	JS-NGO-11s_63-125_2nd	63-125	91	150	140	34	89250	-	-	-	-	-	-	-	-	-	-	-	-	-	-	-	-	-	-	-	-	-	-	yes	-	-	-	-	-	-	-	-	-	-	-	-	-	-	-	38.17	6.14	1.2559
	JS-NGO-11s	JS-NGO-11s_63-125_2nd	63-125	92	90	80	20	18000	yes	-	-	-	-	-	-	-	-	-	-	-	-	-	-	-	-	-	-	-	-	-	-	-	-	-	-	-	-	-	-	-	-	-	-	-	-	-	38.79	4.62	7.1
	JS-NGO-11s	JS-NGO-11s_63-125_2nd	63-125	93	80	60	20	12000	-	-	-	-	-	-	-	-	yes	-	-	-	-	-	-	-	-	-	-	-	-	-	-	-	-	-	-	-	-	-	-	-	-	-	-	-	-	-	38.25	2.33	10.66
	JS-NGO-11s	JS-NGO-11s_63-125_2nd	63-125	95	90	120	20	27000	yes	-	-	-	-	-	-	-	-	-	-	-	-	-	-	-	-	-	-	-	-	-	-	-	-	-	-	-	-	-	-	-	-	-	-	-	-	-	38.64	8.44	0.9228
	JS-NGO-11s	JS-NGO-11s_63-125_2nd	63-125	96	60	80	14	8400	-	-	-	-	-	-	-	-	-	-	-	-	-	-	-	-	-	-	-	-	-	-	yes	-	-	-	-	-	-	-	-	-	-	-	-	-	-	-	38.71	8.36	0.9197
	JS-NGO-11s	JS-NGO-11s_63-125_2nd	63-125	97	140	100	24	42000	-	-	-	-	-	-	-	-	-	-	-	-	-	-	-	-	-	-	-	-	-	-	yes	-	-	-	-	-	-	-	-	-	-	-	-	-	-	-	38.62	7.39	1.0034
	JS-NGO-11s	JS-NGO-11s_63-125_2nd	63-125	98	80	90	22	19800	-	-	-	-	-	-	-	-	-	-	-	-	-	-	-	-	-	-	-	-	-	-	yes	-	-	-	-	-	-	-	-	-	-	-	-	-	-	-	38.73	7.15	1.1296
	JS-NGO-11s	JS-NGO-11s_63-125_2nd	63-125	99	100	100	26	32500	yes	-	-	-	-	-	-	-	-	-	-	-	-	-	-	-	-	-	-	-	-	-	-	-	-	-	-	-	-	-	-	-	-	-	-	-	-	-	37.8	3.53	2.09
	JS-NGO-11s	JS-NGO-11s_63-125_2nd	63-125	100	70	80	20	14000	yes	-	-	yes	-	-	-	-	-	-	-	-	-	-	-	-	-	-	-	-	-	-	-	-	-	-	-	-	-	-	-	-	-	-	-	-	-	-	39.39	7.91	7.26
	JS-NGO-11s	NGO-HM3	125-250	1	120	320	40	192000	yes	-	-	-	-	-	-	-	-	-	-	-	-	-	-	-	-	-	-	-	-	-	-	-	-	-	-	-	-	-	-	-	-	-	-	-	-	-	37.61	4.79	1.48
	JS-NGO-11s	NGO-HM3	125-250	2	210	450	40	472500	-	-	-	-	-	-	-	-	-	-	-	-	-	-	-	-	-	-	-	-	-	-	yes	yes	-	-	-	-	-	-	-	-	-	-	-	-	-	-	38.94	8.94	0.8856
	JS-NGO-11s	NGO-HM3	125-250	3	180	120	40	108000	-	-	-	-	-	-	-	-	-	-	-	-	-	-	-	-	-	-	-	-	-	-	yes	-	-	-	-	-	-	-	-	-	-	-	-	-	-	-	38.83	8.71	0.8606
	JS-NGO-11s	NGO-HM3	125-250	4	130	240	40	156000	-	-	-	-	-	-	-	-	-	-	-	-	-	-	-	-	-	-	-	-	-	-	-	-	-	-	-	-	-	-	yes	-	-	-	-	-	-	-	38.88	9.19	1.2522
	JS-NGO-11s	NGO-HM3	125-250	5	280	260	20	182000	yes	-	-	-	-	-	-	-	-	-	-	-	-	-	-	-	-	-	-	-	-	-	-	-	-	-	-	-	-	-	-	-	-	-	-	-	-	-	39.33	9.03	1.44
	JS-NGO-11s	NGO-HM3	125-250	6	290	240	40	348000	yes	-	-	-	-	-	-	-	-	-	-	-	-	-	-	-	-	-	-	-	-	-	yes	-	-	-	-	-	-	-	-	-	-	-	-	-	-	-	38.25	7.42	0.8609
	JS-NGO-11s	NGO-HM3	125-250	7	250	210	40	262500	yes	-	-	-	-	-	-	-	-	-	-	-	-	-	-	-	-	-	-	-	-	-	-	-	-	-	-	-	-	-	-	-	-	-	-	-	-	-	38.16	5.14	2.83
	JS-NGO-11s	NGO-HM3	125-250	8	180	330	40	297000	-	-	-	-	-	-	-	-	-	-	-	-	-	-	-	-	-	-	-	-	-	-	-	-	-	-	-	-	-	-	yes	-	-	-	-	-	-	-	38.69	6.39	6.05
	JS-NGO-11s	NGO-HM3	125-250	9	150	200	40	150000	-	-	-	-	-	-	-	-	-	-	-	-	-	-	-	-	-	-	-	-	-	-	-	-	-	-	yes	-	-	-	-	yes	-	-	-	-	-	CO2	38.27	5.32	1.2656
	JS-NGO-11s	NGO-HM3	125-250	10	250	270	40	337500	yes	-	-	-	-	-	-	-	-	-	-	-	-	-	-	-	-	-	-	-	-	-	-	-	-	-	yes	-	-	-	-	-	-	-	-	-	-	-	37.38	3.92	1.49
	JS-NGO-11s	NGO-HM3	125-250	12	80	140	40	56000	-	-	-	-	-	-	-	-	-	-	-	-	-	-	-	-	-	-	-	-	-	-	-	-	-	-	-	-	-	-	yes	-	-	-	yes	-	-	-	38.31	4.39	6.75
	JS-NGO-11s	NGO-HM3	125-250	13	220	190	40	209000	-	-	-	-	-	-	-	-	-	-	-	yes	-	-	-	-	-	-	-	-	-	-	-	-	-	-	-	-	-	-	-	-	-	-	-	-	-	-	38.3	6.13	2.4
	JS-NGO-11s	NGO-HM3	125-250	14	260	650	40	845000	yes	-	-	-	-	-	-	-	-	-	-	yes	-	-	-	-	-	-	-	-	-	-	-	-	-	-	-	-	-	-	-	-	-	-	-	-	-	-	38.48	6.91	1.2012
	JS-NGO-11s	NGO-HM3	125-250	15	170	150	40	127500	yes	-	-	-	-	-	-	-	-	-	-	yes	-	-	-	-	-	-	-	-	-	-	-	-	-	-	-	-	-	-	-	-	-	-	-	-	-	-	38.25	5.48	1.283
	JS-NGO-11s	NGO-HM3	125-250	16	230	150	40	172500	-	-	-	-	-	-	-	-	-	-	-	-	-	-	-	-	-	-	-	-	-	-	-	-	-	-	-	-	-	-	-	-	-	-	yes	-	-	-	38.18	5.83	1.1969
	JS-NGO-11s	NGO-HM3	125-250	17	190	130	10	30875	-	-	-	-	-	-	-	-	-	-	-	-	-	-	-	-	-	-	-	-	-	-	-	-	-	-	-	-	-	-	-	-	-	-	yes	-	-	-	38.51	7.55	0.9388
	JS-NGO-11s	NGO-HM3	125-250	18	120	230	40	138000	-	-	-	yes	-	yes	-	-	-	-	-	-	-	-	-	-	-	-	-	-	-	-	yes	-	-	-	-	-	-	-	-	-	-	-	-	-	-	-	38.48	7.69	1.0711
	JS-NGO-11s	NGO-HM3	125-250	19	360	250	40	450000	yes	-	-	-	-	-	-	-	-	-	-	yes	-	-	-	-	-	-	-	-	-	-	-	-	-	-	-	-	-	yes	-	-	-	-	-	-	-	-	38.93	8.83	2.15
	JS-NGO-11s	NGO-HM3	125-250	20	230	250	40	287500	-	-	-	-	-	-	-	-	-	-	-	-	-	-	-	yes	-	-	-	-	-	-	-	-	-	-	yes	-	-	-	-	-	-	-	-	-	-	-	38.65	8.06	0.9224
	JS-NGO-11s	NGO-HM3	125-250	21	180	330	40	297000	-	-	-	-	-	-	-	-	-	-	-	-	-	-	-	-	-	-	-	-	-	-	-	-	-	-	yes	-	-	-	-	-	-	-	-	-	-	-	37.87	6.94	0.5409
	JS-NGO-11s	NGO-HM3	125-250	22	340	200	40	340000	-	-	-	-	-	-	-	-	-	-	-	-	-	-	-	-	-	-	-	-	-	-	-	-	-	-	yes	-	-	-	-	-	-	-	-	-	-	-	39.11	8.91	0.9143
	JS-NGO-11s	NGO-HM3	125-250	23	90	140	40	63000	yes	-	-	-	-	-	-	-	-	-	-	-	-	-	-	-	-	-	-	-	-	-	-	-	-	-	-	-	-	-	-	-	-	-	-	-	-	-	38.01	4.42	1.2231
	JS-NGO-11s	NGO-HM3	125-250	24	80	150	40	60000	-	-	-	-	-	-	-	-	-	-	-	-	-	-	-	-	-	-	-	-	-	-	-	-	-	-	-	-	-	yes	yes	-	-	-	-	-	-	-	37.72	2.32	5.74
	JS-NGO-11s	NGO-HM3	125-250	25	120	110	40	66000	-	-	-	-	-	-	-	-	-	-	-	yes	-	-	-	-	-	-	-	-	-	-	-	-	-	-	-	-	-	-	-	-	-	-	-	-	-	-	38.21	6.68	1.0493
	JS-NGO-11s	NGO-HM3	125-250	26	240	160	40	192000	-	-	-	-	-	-	-	-	-	-	-	yes	-	-	-	-	-	-	-	-	-	-	-	-	-	-	-	-	-	yes	-	-	-	-	-	-	yes	carbonate + graphite + CO2	38.9	8.06	1.58
	JS-NGO-11s	NGO-HM3	125-250	27	170	130	40	110500	-	-	-	-	-	-	-	-	-	-	-	yes	-	-	-	-	-	-	-	-	-	-	-	-	-	-	-	-	-	-	-	-	-	-	-	-	-	-	37.64	4.23	3.09
	JS-NGO-11s	NGO-HM3	125-250	29	210	290	40	304500	-	-	-	yes	-	-	-	-	-	-	-	yes	-	-	-	-	-	-	-	-	-	-	-	-	-	-	-	-	-	yes	-	-	-	-	-	-	-	-	38.62	7.37	2.04
	JS-NGO-11s	NGO-HM3	125-250	30	190	190	40	180500	yes	-	-	-	-	-	-	-	-	-	-	-	-	-	-	-	-	-	-	-	-	-	-	-	-	-	-	-	-	-	-	-	-	-	-	-	-	-	38.17	6.68	1.2555
	JS-NGO-11s	NGO-HM3	125-250	31	190	270	40	256500	yes	-	-	-	-	-	-	-	-	-	-	-	-	-	-	yes	-	-	-	-	-	-	-	-	-	-	-	-	-	-	yes	-	-	-	yes	-	-	-	38.78	7.82	3.69
	JS-NGO-11s	NGO-HM3	125-250	32	250	240	40	300000	-	-	-	-	-	-	-	-	-	-	-	-	-	-	-	-	-	-	-	-	-	-	yes	-	-	-	yes	-	-	-	-	-	-	-	-	yes	-	-	38.06	6.82	1.0451
	JS-NGO-11s	NGO-HM3	125-250	33	200	240	40	240000	-	-	-	-	-	-	-	-	-	-	-	yes	-	-	-	-	-	-	-	-	-	-	yes	-	-	-	-	-	-	-	-	-	-	-	-	-	-	-	38.49	6.25	1.0836
	JS-NGO-11s	NGO-HM3	125-250	34	200	260	40	260000	yes	-	-	yes	-	-	-	-	-	-	-	-	-	-	-	-	-	-	-	-	-	-	-	-	-	-	-	-	-	-	-	-	-	-	-	-	-	-	37.76	5.07	2.56
	JS-NGO-11s	NGO-HM3	125-250	35	130	160	40	104000	-	-	-	-	-	-	-	-	-	-	-	-	yes	-	-	-	-	-	-	-	-	-	-	-	-	-	-	-	-	-	-	-	-	-	-	-	-	-	38.13	5.38	0.9453
	JS-NGO-11s	NGO-HM3	125-250	36	140	130	20	45500	-	-	-	-	-	-	-	-	-	-	-	yes	-	-	-	-	-	-	-	-	-	-	-	-	-	-	-	-	-	-	-	-	-	-	-	-	-	-	38.17	5.94	1.3575
	JS-NGO-11s	NGO-HM3	125-250	37	160	110	40	88000	-	-	-	-	-	-	-	-	-	-	-	-	-	-	-	yes	-	-	-	-	-	-	-	-	-	-	-	-	-	-	-	-	-	-	-	-	-	-	38.78	8.51	1.1782
	JS-NGO-11s	NGO-HM3	125-250	38	90	210	40	94500	yes	-	-	-	-	-	-	-	-	-	-	-	-	-	-	-	-	-	-	-	-	-	-	-	-	-	-	-	-	-	-	-	-	-	-	-	-	-	37.85	2.49	5.58
	JS-NGO-11s	NGO-HM3	125-250	39	230	170	40	195500	-	-	-	-	-	-	-	-	-	-	-	yes	-	-	-	-	-	-	-	-	-	-	-	-	-	-	-	-	-	-	-	-	-	-	-	-	-	-	38.42	5.29	4.23
	JS-NGO-11s	NGO-HM3	125-250	40	190	180	40	171000	-	-	-	yes	-	yes	-	-	-	-	-	-	-	-	-	-	-	-	-	-	-	-	yes	-	-	-	-	-	-	-	-	-	-	-	-	-	-	-	38.62	7.98	0.9366
	JS-NGO-11s	NGO-HM3	125-250	41	220	190	40	209000	-	-	-	-	-	-	-	-	-	-	-	-	-	-	-	-	-	-	-	-	-	-	yes	-	-	-	-	-	-	-	yes	-	-	-	-	-	-	-	36.94	2.51	1.1947
	JS-NGO-11s	NGO-HM3	125-250	42	180	210	40	189000	yes	-	-	-	yes	yes	-	-	-	-	-	-	-	-	-	-	-	-	-	-	-	-	-	-	-	-	-	-	-	-	-	-	-	-	-	-	-	-	38.22	6.04	1.2331
	JS-NGO-11s	NGO-HM3	125-250	43	380	170	40	323000	yes	-	-	-	-	-	-	-	-	-	-	yes	-	-	-	-	-	-	-	-	-	-	-	-	-	-	-	-	-	-	-	-	-	-	-	-	-	-	37.89	5.33	1.71
	JS-NGO-11s	NGO-HM3	125-250	44	150	150	40	112500	yes	yes	-	-	-	-	-	-	-	-	-	-	-	-	-	-	-	-	-	-	-	-	-	-	-	-	-	-	-	-	-	-	-	-	-	-	-	-	38.05	4.82	3.63
	JS-NGO-11s	NGO-HM3	125-250	45	230	150	40	172500	-	-	-	-	-	-	-	-	-	-	-	-	-	-	-	-	-	-	-	-	-	-	yes	-	-	-	-	-	-	-	-	-	-	-	-	-	-	-	38.58	8.2	0.892
	JS-NGO-11s	NGO-HM3	125-250	46	200	110	40	110000	yes	-	-	-	-	-	-	-	-	-	-	-	-	-	-	-	-	-	-	-	-	-	-	-	-	-	-	-	-	-	-	-	-	-	-	-	-	-	38.49	6.91	2.27
	JS-NGO-11s	NGO-HM3	125-250	47	130	180	40	117000	-	-	-	yes	-	-	-	-	-	-	-	-	-	-	-	-	-	-	-	-	-	-	-	-	-	-	-	-	-	-	-	-	-	-	-	-	-	-	39.12	9.47	1.2163
	JS-NGO-11s	NGO-HM3	125-250	48	250	130	40	162500	-	-	-	-	-	-	-	-	-	-	-	-	-	-	-	-	-	-	-	-	-	-	yes	-	-	-	-	-	-	-	-	-	-	-	-	-	-	-	38.47	7.37	1.1441
	JS-NGO-11s	NGO-HM3	125-250	49	220	200	40	220000	yes	-	-	-	-	-	-	-	-	-	-	-	-	-	-	-	-	-	-	-	-	-	-	-	-	-	-	-	-	-	-	-	-	-	-	-	-	-	38.39	6.18	1.2791
	JS-NGO-11s	NGO-HM3	125-250	50	150	170	40	127500	-	-	-	-	-	-	-	-	-	-	-	-	-	-	-	-	-	-	-	-	-	-	yes	-	-	-	-	-	-	-	-	-	-	-	-	-	-	-	38.83	8.31	1.0853
	JS-NGO-11s	NGO-HM3	125-250	51	120	160	40	96000	-	-	-	-	-	-	-	-	-	-	-	-	-	-	-	-	-	-	-	-	-	-	-	-	-	-	-	-	-	yes	-	-	-	-	-	-	-	-	38.11	5.51	1.64
	JS-NGO-11s	NGO-HM3	125-250	52	190	170	40	161500	-	-	-	-	-	-	-	-	-	-	-	-	-	-	-	-	-	-	-	-	-	-	yes	-	-	-	-	-	-	-	-	-	-	-	-	-	-	-	39.14	9.13	1.41
	JS-NGO-11s	NGO-HM3	125-250	53	150	110	40	82500	-	-	-	yes	-	-	-	-	-	-	-	-	-	-	-	-	-	-	-	-	-	-	-	-	-	-	-	-	yes	-	-	-	-	-	-	-	-	-	38.75	9.15	0.9987
	JS-NGO-11s	NGO-HM3	125-250	54	150	210	40	157500	-	-	-	-	-	-	-	-	-	-	-	-	-	-	-	-	-	-	-	-	-	-	yes	-	-	-	-	-	-	-	-	-	-	-	-	-	-	-	38.75	8.03	0.999
	JS-NGO-11s	NGO-HM3	125-250	55	120	210	40	126000	-	-	-	-	-	-	-	-	-	-	-	yes	-	-	-	-	-	-	-	-	-	-	-	-	-	-	-	-	-	-	-	-	-	-	-	-	-	-	38.18	7.21	0.9641
	JS-NGO-11s	NGO-HM3	125-250	56	270	220	40	297000	-	-	-	-	-	-	-	-	-	-	-	-	-	-	-	yes	-	-	-	-	-	-	-	-	-	-	-	-	-	-	-	-	-	-	-	-	-	-	38.94	8.94	1.68
	JS-NGO-11s	NGO-HM3	125-250	57	130	130	40	84500	-	-	-	yes	-	-	-	-	-	-	-	-	-	-	-	-	-	-	-	-	-	-	yes	-	-	-	-	-	-	-	-	-	-	-	-	-	-	-	38.8	8.77	0.9118
	JS-NGO-11s	NGO-HM3	125-250	58	280	150	40	210000	yes	-	-	-	-	-	-	-	-	-	-	yes	-	-	-	-	-	-	-	-	-	-	yes	-	-	-	-	-	-	-	yes	-	-	-	yes	yes	-	-	38.1	5.69	1.1886
	JS-NGO-11s	NGO-HM3	125-250	59	210	270	40	283500	yes	-	-	-	-	-	-	-	-	-	-	-	-	-	-	-	-	-	-	-	-	-	-	-	-	-	-	-	-	-	-	-	-	-	-	-	-	-	38.5	8.04	1.1021
	JS-NGO-11s	NGO-HM5	125-250	60	280	280	40	392000	-	-	-	-	-	-	-	-	-	-	-	-	-	-	-	-	-	-	-	-	-	-	yes	yes	-	-	-	-	-	-	-	-	-	-	-	-	-	-	38.45	8.69	0.891
	JS-NGO-11s	NGO-HM5	125-250	61	150	170	40	127500	-	-	-	yes	-	-	-	-	-	-	-	-	-	-	-	-	-	-	-	-	-	-	-	-	-	-	-	-	-	-	-	-	-	-	-	-	-	-	37.99	7.75	0.9796
	JS-NGO-11s	NGO-HM5	125-250	62	340	320	40	544000	yes	-	-	-	-	-	-	-	-	-	-	-	-	yes	-	-	-	-	-	-	-	-	yes	-	-	-	-	-	-	-	-	-	-	-	-	yes	-	-	38.07	7.15	1.0016
	JS-NGO-11s	NGO-HM5	125-250	63	250	220	40	275000	yes	-	-	yes	-	-	-	-	-	-	-	-	-	-	-	yes	-	-	-	-	-	-	-	-	-	-	-	-	-	yes	-	-	-	-	-	-	-	-	38.63	8.62	1.1082
	JS-NGO-11s	NGO-HM5	125-250	64	140	260	40	182000	-	-	-	-	-	-	-	-	-	-	-	-	-	-	-	-	-	-	-	-	-	-	-	-	-	-	yes	-	-	-	-	-	-	-	-	-	-	-	37.55	3.51	4.19
	JS-NGO-11s	NGO-HM5	125-250	65	120	100	40	60000	-	-	-	-	-	-	-	-	-	-	-	-	-	-	-	-	-	-	-	-	-	-	-	yes	-	-	-	-	-	-	-	-	-	-	-	-	-	-	38.23	7.64	1.1404
	JS-NGO-11s	NGO-HM5	125-250	66	160	100	40	80000	-	-	-	-	-	-	-	-	-	-	-	-	-	-	-	-	-	-	-	-	-	-	yes	-	-	-	-	-	-	-	-	-	-	-	-	-	-	-	38.51	8.84	0.8677
	JS-NGO-11s	NGO-HM5	125-250	67	190	190	40	180500	-	-	-	-	-	-	-	-	-	-	-	-	-	-	-	-	-	-	-	-	-	-	yes	-	-	-	-	-	-	-	-	-	-	-	-	-	-	-	38.44	7.53	0.9325
	JS-NGO-11s	NGO-HM5	125-250	68	130	210	40	136500	-	-	-	-	-	-	-	-	-	-	-	-	-	-	-	-	-	-	-	-	-	-	yes	-	-	-	-	-	-	-	-	-	-	-	-	-	-	-	38.34	8.71	0.8645
	JS-NGO-11s	NGO-HM5	125-250	69	160	160	40	128000	-	-	-	yes	-	-	-	-	-	-	-	-	-	-	-	-	-	-	-	-	-	-	-	-	-	-	-	-	-	-	yes	-	-	-	-	-	-	-	38.73	9.67	0.9868
	JS-NGO-11s	NGO-HM5	125-250	70	190	160	40	152000	yes	-	-	-	-	-	-	-	-	-	-	-	-	-	-	-	-	-	-	-	-	-	-	-	-	-	-	-	-	-	-	-	-	yes	-	-	-	-	37.8	6.01	1.3151
	JS-NGO-11s	NGO-HM5	125-250	71	160	190	40	152000	-	-	-	-	-	-	-	-	-	-	-	-	-	-	-	-	-	-	-	-	-	-	-	-	-	-	yes	-	-	-	-	-	-	-	-	-	-	-	37.95	5.28	2.78
	JS-NGO-11s	NGO-HM5	125-250	72	160	460	40	368000	-	-	-	-	-	-	-	-	-	-	-	-	-	-	-	-	-	-	-	-	-	-	yes	-	-	-	-	-	-	-	-	-	-	-	-	-	-	-	38.83	9.24	0.8863
	JS-NGO-11s	NGO-HM5	125-250	73	110	230	20	63250	-	-	-	-	-	-	-	-	-	-	-	-	-	-	-	-	-	-	-	-	-	-	yes	-	-	-	-	-	-	-	-	-	-	-	-	-	-	-	37.89	6.68	0.9323
	JS-NGO-11s	NGO-HM5	125-250	74	240	200	40	240000	-	-	-	-	-	-	-	-	-	-	-	-	-	-	-	-	-	-	-	-	-	-	-	-	-	-	yes	-	-	-	-	-	-	-	-	-	-	-	38.4	8.59	1.3754
	JS-NGO-11s	NGO-HM5	125-250	75	160	230	40	184000	-	-	-	-	-	-	-	-	-	-	-	yes	-	-	-	-	-	-	-	-	-	-	-	-	-	-	-	-	-	yes	-	-	-	-	-	-	yes	graphite + carbonate + CO2	38.09	6.72	1.0834
	JS-NGO-11s	NGO-HM5	125-250	76	260	170	40	221000	-	-	-	-	-	-	-	-	-	-	-	-	-	yes	-	-	-	-	-	-	-	-	-	-	-	-	-	-	-	-	-	-	-	-	-	-	-	-	37.87	5.6	1.42
	JS-NGO-11s	NGO-HM5	125-250	77	190	150	40	142500	-	-	-	-	-	-	-	-	-	-	-	-	-	-	-	yes	-	-	-	-	-	-	-	-	-	-	-	-	-	-	yes	-	-	-	-	-	-	-	38.33	7.82	1.258
	JS-NGO-11s	NGO-HM5	125-250	78	120	190	40	114000	-	-	-	-	-	-	-	-	-	-	-	-	-	-	-	-	-	-	-	-	-	-	yes	-	-	-	-	-	-	-	-	-	-	-	-	-	-	-	37.95	5.95	1.0526
	JS-NGO-11s	NGO-HM5	125-250	79	160	140	40	112000	-	-	-	-	-	-	-	-	-	-	-	-	-	-	-	-	-	-	-	-	-	-	yes	-	-	-	-	-	-	-	-	-	-	-	-	-	-	-	38.28	8	1.0064
	JS-NGO-11s	NGO-HM5	125-250	80	220	120	40	132000	-	-	-	yes	-	-	-	-	-	-	-	yes	-	-	-	-	-	-	-	-	-	-	-	-	-	-	-	-	-	-	-	-	-	-	-	-	-	-	39.1	10.41	1.2808
	JS-NGO-11s	NGO-HM5	125-250	81	120	170	40	102000	yes	-	-	yes	yes	-	-	-	-	-	-	-	-	-	-	-	-	-	-	-	-	-	-	-	-	-	-	-	-	-	-	-	-	-	-	-	-	-	37.74	5.24	1.87
	JS-NGO-11s	NGO-HM5	125-250	82	190	160	40	152000	-	-	-	-	-	-	-	-	-	-	-	-	-	-	-	-	-	-	-	-	-	-	-	-	-	-	-	-	-	-	yes	-	-	-	-	-	-	-	37.9	4.32	5.25
	JS-NGO-11s	NGO-HM5	125-250	83	180	170	40	153000	-	-	-	yes	-	-	-	-	-	-	-	-	-	-	-	-	-	-	-	-	-	-	-	-	-	-	-	-	-	-	-	-	-	-	-	-	-	-	38.17	7.13	0.5409
	JS-NGO-11s	NGO-HM5	125-250	84	210	140	40	147000	-	-	-	-	-	-	-	-	-	-	-	-	-	-	-	-	-	-	-	-	-	-	yes	-	-	-	-	-	-	-	-	-	-	-	-	-	-	-	38.45	7.93	0.8898
	JS-NGO-11s	NGO-HM5	125-250	85	160	130	40	104000	-	-	-	yes	-	-	-	-	-	-	-	-	-	-	-	-	-	-	-	-	-	-	yes	-	-	-	-	-	-	-	-	-	-	-	-	-	-	-	38.81	9.15	0.9933
	JS-NGO-11s	NGO-HM5	125-250	86	200	190	40	190000	-	-	-	-	-	-	-	-	-	-	-	-	-	yes	-	-	-	-	-	-	-	-	-	-	-	-	-	-	-	-	-	-	-	-	-	yes	-	-	38.51	8.35	0.8864
	JS-NGO-11s	NGO-HM5	125-250	87	210	300	40	315000	-	-	-	-	-	-	-	-	-	-	-	-	-	-	-	-	-	-	-	-	-	-	yes	-	-	-	-	-	-	-	-	-	-	-	-	-	-	-	38.63	8.29	0.9851
	JS-NGO-11s	NGO-HM5	125-250	88	170	160	40	136000	-	-	-	-	-	-	-	-	-	-	-	-	-	-	-	-	-	-	-	-	-	-	yes	-	-	-	-	-	-	-	-	-	-	-	-	-	-	-	38.62	8.09	1.0495
	JS-NGO-11s	NGO-HM5	125-250	89	150	120	40	90000	yes	-	-	-	-	-	-	-	-	-	-	-	-	-	-	yes	-	-	-	-	-	-	-	-	-	-	-	-	-	-	-	-	-	-	yes	-	-	-	37.27	1.78	5.34
	JS-NGO-11s	NGO-HM5	125-250	90	150	120	40	90000	-	-	-	-	-	-	-	-	-	-	-	-	-	yes	-	-	-	-	-	-	-	-	yes	-	-	-	-	-	-	-	-	-	-	-	-	yes	-	-	38.45	7.01	1.2471
	JS-NGO-11s	NGO-HM5	125-250	91	200	170	40	170000	-	-	-	-	-	-	-	-	-	-	-	-	-	-	-	-	-	-	-	-	-	-	yes	-	-	-	-	-	-	-	-	-	-	-	-	-	-	-	38.05	7.51	0.9322
	JS-NGO-11s	NGO-HM5	125-250	92	200	180	40	180000	-	-	-	-	-	-	-	-	-	-	-	-	-	-	-	-	-	-	-	-	-	-	-	yes	-	-	-	-	-	-	-	-	-	-	-	-	-	-	38.33	9.89	0.975
	JS-NGO-11s	NGO-HM5	125-250	93	150	130	40	97500	-	-	-	-	-	-	-	-	-	-	-	-	-	yes	-	-	-	-	-	-	-	-	yes	-	-	-	-	-	-	-	-	-	-	-	-	-	-	-	38.19	7.37	1.072
	JS-NGO-11s	NGO-HM5	125-250	94	180	280	40	252000	-	-	-	yes	-	-	-	-	-	-	-	-	-	-	-	-	-	-	-	-	-	-	-	-	-	-	-	-	-	-	-	yes	-	-	yes	-	-	-	38.46	8.46	0.9875
	JS-NGO-11s	NGO-HM5	125-250	95	240	190	40	228000	-	-	-	-	-	-	-	-	-	-	-	-	-	yes	-	-	-	-	-	-	-	-	-	-	-	-	-	-	-	-	-	-	-	-	-	-	-	-	38.25	7.4	0.9571
	JS-NGO-11s	NGO-HM5	125-250	96	300	280	40	420000	-	-	-	-	yes	-	-	-	-	-	-	-	-	-	-	-	-	-	-	-	-	-	-	yes	-	-	-	-	-	-	-	-	-	-	-	-	-	-	38.88	9.39	1.1576
	JS-NGO-11s	NGO-HM5	125-250	97	160	280	40	224000	yes	-	-	-	-	-	-	-	-	-	-	-	-	-	-	-	-	-	-	-	-	-	yes	-	-	-	-	-	-	-	-	-	-	-	-	-	-	-	38.42	8.63	0.8694
	JS-NGO-11s	NGO-HM5	125-250	98	250	300	40	375000	-	-	-	-	-	-	-	-	-	-	-	yes	-	-	-	-	-	-	-	-	-	-	-	-	-	-	-	-	-	-	-	-	-	-	-	-	-	-	38.6	7.48	1.91
	JS-NGO-11s	NGO-HM5	125-250	99	210	120	40	126000	-	-	-	-	-	-	-	-	-	-	-	yes	-	-	-	-	-	-	-	-	-	-	yes	-	-	-	-	-	-	-	-	-	-	-	-	-	-	-	38.41	7.41	0.9803
	JS-NGO-11s	NGO-HM5	125-250	100	310	170	40	263500	-	-	-	-	-	-	-	-	-	-	-	-	-	-	-	-	-	-	-	-	-	-	yes	-	-	-	-	-	-	-	-	-	-	-	-	-	-	-	38.11	7.1	0.9131
	JS-NGO-11s	NGO-HM5	125-250	101	140	250	40	175000	-	-	-	-	-	-	-	-	-	-	-	-	-	-	-	-	-	-	-	-	-	-	-	-	-	-	-	-	-	-	yes	-	-	-	-	-	-	-	37.87	4.77	6.73
	JS-NGO-11s	NGO-HM5	125-250	102	210	260	40	273000	yes	-	-	-	-	-	-	-	-	-	-	-	-	-	-	-	-	-	-	-	-	-	-	-	-	-	-	-	-	-	-	-	-	-	-	-	-	-	37.84	3.61	5.73
	JS-NGO-11s	NGO-HM5	125-250	103	160	130	40	104000	-	-	-	-	-	-	-	-	-	-	-	-	-	-	-	-	-	-	-	-	-	-	yes	-	-	-	-	-	-	-	-	-	-	-	-	-	-	-	37.93	6.08	0.7522
	JS-NGO-11s	JS-NGO-11s_250-500_1st	250-500	1	280	280	40	392000	-	-	-	-	-	-	-	-	-	-	-	-	-	-	-	-	-	-	yes	-	-	-	-	-	-	-	-	-	-	-	-	-	-	-	-	-	-	-	38.76	7.51	1.75
	JS-NGO-11s	JS-NGO-11s_250-500_1st	250-500	2	350	450	40	787500	-	-	-	-	-	-	-	-	-	-	-	-	-	-	-	-	-	-	-	-	-	-	yes	-	-	-	-	-	-	-	-	-	-	-	-	yes	-	-	38.7	8.4	0.8171
	JS-NGO-11s	JS-NGO-11s_250-500_1st	250-500	3	420	280	40	588000	-	-	-	yes	-	yes	-	-	-	-	-	-	-	-	-	-	-	-	-	-	-	-	-	-	-	-	-	-	-	-	-	-	-	-	-	-	-	-	38.81	8.51	1.69
	JS-NGO-11s	JS-NGO-11s_250-500_1st	250-500	4	300	200	40	300000	-	-	-	-	-	-	-	-	-	-	-	-	-	-	-	-	-	-	-	-	-	-	yes	-	-	-	yes	-	-	-	-	-	-	-	-	-	-	-	38.18	6.62	0.965
	JS-NGO-11s	JS-NGO-11s_250-500_1st	250-500	5	310	260	40	403000	-	-	-	-	-	-	-	-	-	-	-	yes	-	-	-	-	-	-	-	-	-	-	-	-	-	-	yes	-	-	-	-	-	-	-	-	-	-	-	38.67	8.3	0.9112
	JS-NGO-11s	JS-NGO-11s_250-500_1st	250-500	6	390	260	40	507000	yes	-	-	-	-	-	-	-	-	-	-	-	-	-	-	-	-	-	-	-	-	-	-	-	-	-	-	-	-	-	-	-	-	-	-	yes	-	-	38.03	3.82	6.37
	JS-NGO-11s	JS-NGO-11s_250-500_1st	250-500	7	320	260	40	416000	yes	-	-	-	-	-	-	-	-	-	-	-	-	-	-	-	-	-	-	-	-	-	yes	-	-	-	-	-	-	-	-	-	-	-	-	-	-	-	38.71	8.12	0.9941
	JS-NGO-11s	JS-NGO-11s_250-500_1st	250-500	8	150	300	40	225000	-	-	-	-	-	-	-	-	-	-	-	-	-	-	-	-	-	-	yes	-	-	-	yes	-	-	-	-	-	-	-	-	-	-	-	-	-	-	-	38.75	7.38	1.0664
	JS-NGO-11s	JS-NGO-11s_250-500_1st	250-500	10	310	500	40	775000	-	-	-	-	-	-	-	-	-	-	-	-	-	-	-	-	-	-	-	-	-	-	-	-	-	-	-	-	-	-	-	-	-	-	yes	-	-	-	38.16	5.79	1.41
	JS-NGO-11s	JS-NGO-11s_250-500_1st	250-500	11	350	360	40	630000	-	-	-	-	-	-	-	-	-	-	-	-	-	-	-	-	-	-	yes	-	-	-	-	-	-	-	-	-	-	-	yes	-	-	-	-	-	-	-	38.56	6.32	3.52
	JS-NGO-11s	JS-NGO-11s_250-500_1st	250-500	12	480	630	40	1512000	-	-	-	-	-	-	-	-	-	-	-	-	-	-	-	-	-	-	-	-	-	-	-	-	-	-	yes	-	-	-	-	-	-	-	-	-	-	contact to amphibole and dickite	38.34	6.14	1.221
	JS-NGO-11s	JS-NGO-11s_250-500_1st	250-500	13	250	400	40	500000	-	-	-	-	-	-	-	-	-	-	-	-	-	-	-	yes	-	-	-	-	-	-	-	yes	-	-	-	-	-	-	-	-	-	-	-	-	-	-	39.02	8.84	0.9281
	JS-NGO-11s	JS-NGO-11s_250-500_1st	250-500	14	490	340	40	833000	-	-	-	-	-	-	-	-	-	-	-	yes	-	-	-	-	-	-	-	-	-	-	-	-	-	-	yes	-	-	-	-	-	-	-	-	-	-	-	38.2	6.27	1.2409
	JS-NGO-11s	JS-NGO-11s_250-500_1st	250-500	16	200	380	40	380000	-	-	-	yes	-	yes	-	-	-	-	-	-	-	-	-	-	-	-	-	-	-	-	-	-	-	-	yes	-	-	-	-	-	-	-	-	-	-	-	39.07	8.56	1.3799
	JS-NGO-11s	JS-NGO-11s_250-500_1st	250-500	17	300	570	40	855000	yes	-	-	-	-	-	-	-	-	-	-	-	-	-	-	-	-	-	-	-	-	-	-	-	-	-	-	-	-	-	-	-	-	-	-	-	-	-	37.68	3.13	2.15
	JS-NGO-11s	JS-NGO-11s_250-500_1st	250-500	18	250	480	40	600000	yes	-	-	-	-	-	-	-	-	-	-	-	-	-	-	-	-	-	-	-	-	-	-	-	-	-	-	-	-	-	yes	-	-	-	-	-	-	-	37.95	3.68	3.09
	JS-NGO-11s	JS-NGO-11s_250-500_1st	250-500	19	740	280	40	1036000	yes	-	-	-	-	-	-	-	-	-	-	yes	-	-	-	-	-	-	-	-	-	-	-	-	-	-	yes	-	-	-	-	-	-	-	-	-	-	-	37.9	5.54	2.25
	JS-NGO-11s	JS-NGO-11s_250-500_1st	250-500	20	400	320	40	640000	-	-	-	-	-	-	-	-	-	-	-	-	-	-	-	-	-	-	-	-	-	-	-	-	-	-	-	-	-	-	-	yes	-	-	-	-	-	-	37.9	3.5	2.25
	JS-NGO-11s	JS-NGO-11s_250-500_1st	250-500	21	430	350	40	752500	yes	-	-	-	-	-	-	-	-	-	-	-	-	-	-	-	-	-	-	-	-	-	-	-	-	-	-	-	-	-	-	-	-	-	-	-	-	-	38.7	7.68	1.037
	JS-NGO-11s	JS-NGO-11s_250-500_1st	250-500	22	470	220	40	517000	yes	-	-	-	-	-	-	-	-	-	-	yes	-	-	-	-	-	-	-	-	-	-	-	-	-	-	yes	-	-	yes	-	-	-	-	-	-	-	-	38.78	7.7	3.26
	JS-NGO-11s	JS-NGO-11s_250-500_1st	250-500	23	180	400	40	360000	yes	-	-	-	-	-	-	-	-	-	-	-	-	-	-	-	-	-	-	-	-	-	-	-	-	-	-	-	-	-	-	-	-	-	-	-	-	-	38.63	6.04	3.37
	JS-NGO-11s	JS-NGO-11s_250-500_1st	250-500	24	240	580	40	696000	-	-	-	-	-	-	-	-	-	-	-	-	-	yes	-	-	-	-	-	-	-	-	-	-	-	-	yes	-	-	-	-	-	-	-	-	-	-	-	37.21	2.36	3.29
	JS-NGO-11s	JS-NGO-11s_250-500_1st	250-500	25	370	210	40	388500	-	-	-	-	-	-	-	-	-	-	-	-	-	-	-	-	-	-	-	-	-	-	yes	-	-	-	-	-	-	-	-	-	-	-	-	-	-	-	38.39	6.88	1.0254
	JS-NGO-11s	JS-NGO-11s_250-500_1st	250-500	26	220	270	40	297000	-	-	-	-	-	-	-	-	-	-	-	-	-	yes	-	-	-	-	-	-	-	-	-	-	-	-	-	-	-	-	yes	-	-	-	-	-	-	-	38.19	4.36	4.92
	JS-NGO-11s	JS-NGO-11s_250-500_1st	250-500	27	490	330	40	808500	-	-	-	-	-	-	-	-	-	-	-	yes	-	-	-	-	-	-	-	-	-	-	-	-	-	-	yes	-	-	-	-	-	-	-	-	-	-	-	37.87	4.81	1.47
	JS-NGO-11s	JS-NGO-11s_250-500_1st	250-500	28	210	280	40	294000	-	-	-	-	-	-	-	-	-	-	-	-	-	-	-	-	-	-	-	-	-	-	-	-	-	-	yes	yes	-	-	-	-	-	-	-	-	-	-	38.27	6.17	1.269
	JS-NGO-11s	JS-NGO-11s_250-500_1st	250-500	29	250	340	60	637500	yes	-	-	-	-	-	-	-	-	-	-	-	-	-	-	-	-	-	-	-	-	-	-	-	-	-	-	-	-	-	-	-	-	-	-	-	-	-	37.82	2.96	3.48
	JS-NGO-11s	JS-NGO-11s_250-500_1st	250-500	30	540	330	40	891000	yes	-	-	yes	yes	-	-	-	-	-	-	-	-	yes	-	-	-	-	-	-	-	-	-	-	-	-	-	-	-	-	-	-	-	-	-	-	-	-	38.24	6.48	1.371
	JS-NGO-11s	JS-NGO-11s_250-500_1st	250-500	32	370	360	40	666000	-	-	-	yes	-	-	-	-	-	-	-	-	-	-	-	-	-	-	-	-	-	-	yes	-	-	-	-	-	-	-	-	-	-	-	-	-	-	-	38.5	6.73	1.3237
	JS-NGO-11s	JS-NGO-11s_250-500_1st	250-500	33	350	520	40	910000	-	-	-	-	-	-	-	-	-	-	-	-	-	-	-	-	-	-	-	-	-	-	-	-	-	-	-	-	-	yes	-	-	-	-	-	-	-	-	37.76	3.19	4.24
	JS-NGO-11s	JS-NGO-11s_250-500_1st	250-500	34	330	610	40	1006500	yes	-	-	-	-	-	-	-	-	-	-	-	-	-	-	-	-	-	-	-	-	-	yes	-	-	-	-	-	-	-	-	-	-	-	-	-	-	-	38.68	7.46	0.951
	JS-NGO-11s	JS-NGO-11s_250-500_1st	250-500	35	320	180	40	288000	yes	-	-	-	-	-	-	-	-	-	-	-	-	-	-	-	-	-	-	-	-	-	-	-	-	-	-	-	-	yes	-	-	-	-	-	-	-	-	38.86	8.27	3.26
	JS-NGO-11s	JS-NGO-11s_250-500_1st	250-500	36	180	450	40	405000	-	-	-	-	-	-	-	-	-	-	-	-	-	yes	-	-	-	-	-	-	-	-	yes	-	-	-	yes	-	-	-	-	-	-	-	-	-	-	-	38.59	8.51	0.7037
	JS-NGO-11s	JS-NGO-11s_250-500_1st	250-500	37	780	400	40	1560000	yes	-	-	-	-	-	-	-	-	-	-	-	-	-	-	-	-	-	-	-	-	-	-	-	-	-	-	-	-	-	-	-	-	-	-	-	-	-	37.95	4.51	1.54
	JS-NGO-11s	JS-NGO-11s_250-500_1st	250-500	39	200	280	40	280000	-	-	-	-	-	-	-	-	-	-	-	-	-	-	-	-	-	-	-	-	-	-	-	-	-	-	-	-	-	yes	-	-	-	-	-	-	-	-	38.2	4.2	3.73
	JS-NGO-11s	JS-NGO-11s_250-500_1st	250-500	40	300	360	40	540000	-	-	-	-	-	-	-	-	-	-	-	-	-	-	-	-	-	-	-	-	-	-	-	-	-	-	-	-	-	-	yes	-	-	-	-	-	-	-	37.33	1.74	4.75
	JS-NGO-11s	JS-NGO-11s_250-500_1st	250-500	41	360	270	40	486000	-	-	-	-	-	-	-	-	-	-	-	-	-	-	-	-	-	-	-	-	-	-	-	-	-	-	-	-	-	yes	-	-	-	-	-	-	-	-	38.89	7.92	2.07
	JS-NGO-11s	JS-NGO-11s_250-500_1st	250-500	42	390	460	40	897000	-	-	-	-	yes	-	-	-	-	-	-	-	-	-	-	-	-	-	-	-	-	-	-	-	-	-	-	-	-	-	-	-	-	-	-	-	-	-	37.91	4.62	3.57
	JS-NGO-11s	JS-NGO-11s_250-500_1st	250-500	43	380	280	40	532000	-	-	-	-	-	-	-	-	-	-	-	-	-	-	-	yes	-	-	-	-	-	-	-	-	-	-	-	-	-	-	-	-	-	-	yes	-	-	-	38.32	6.58	1.93
	JS-NGO-11s	JS-NGO-11s_250-500_1st	250-500	44	260	270	50	438750	-	-	-	-	-	-	-	-	-	-	-	-	-	-	-	-	-	-	-	-	-	-	-	-	-	-	-	-	-	yes	-	-	-	-	-	-	-	-	37.56	2.77	3.63
	JS-NGO-11s	JS-NGO-11s_250-500_1st	250-500	45	370	200	40	370000	-	-	-	-	-	-	-	-	-	-	-	-	-	-	-	-	-	-	-	-	-	-	-	-	-	-	-	-	-	-	yes	-	-	-	-	-	-	-	38.12	3.22	7.19
	JS-NGO-11s	JS-NGO-11s_250-500_1st	250-500	46	340	350	40	595000	-	-	-	-	-	-	-	-	-	-	-	-	-	-	-	-	-	-	-	-	-	-	-	-	-	-	-	-	-	-	yes	-	-	-	-	-	-	contact to augite-diopside	37.94	6	0.8761
	JS-NGO-11s	JS-NGO-11s_250-500_1st	250-500	47	280	300	40	420000	-	-	-	-	-	-	-	-	-	-	-	-	-	yes	-	-	-	-	-	-	-	-	-	-	-	-	-	-	-	-	-	-	-	-	-	-	-	-	38.92	9.31	1.3916
	JS-NGO-11s	JS-NGO-11s_250-500_1st	250-500	48	320	360	40	576000	-	-	-	-	-	-	-	-	-	-	-	-	-	-	-	-	-	-	-	-	-	-	-	-	-	-	-	-	-	yes	-	-	-	-	-	-	yes	carbonate + CO2	37.73	4.51	1.98
	JS-NGO-11s	JS-NGO-11s_250-500_1st	250-500	49	280	400	40	560000	-	-	-	-	-	-	-	-	-	-	-	-	-	-	-	-	-	-	-	-	-	-	-	-	-	-	yes	-	-	-	-	-	-	-	yes	-	-	-	38.42	5.05	4.2
	JS-NGO-11s	JS-NGO-11s_250-500_1st	250-500	50	380	250	40	475000	yes	-	-	-	-	-	-	-	-	-	-	-	-	-	-	-	-	-	-	-	-	-	-	-	-	-	-	-	-	-	-	-	-	-	-	-	-	-	37.59	2.62	4
	JS-NGO-11s	JS-NGO-11s_250-500_1st	250-500	51	320	440	40	704000	-	-	-	yes	-	-	-	-	-	-	-	-	-	-	-	-	-	-	-	-	-	-	yes	-	-	-	-	-	-	-	-	-	-	-	-	-	-	-	38.86	7.73	1.0538
	JS-NGO-11s	JS-NGO-11s_250-500_1st	250-500	52	350	520	40	910000	yes	-	-	-	-	-	-	-	-	-	-	-	-	-	-	-	-	-	-	-	-	-	-	-	-	-	yes	-	-	-	-	-	-	-	-	-	-	-	38.56	6.43	1.2683
	JS-NGO-11s	JS-NGO-11s_250-500_1st	250-500	53	470	380	40	893000	-	-	-	yes	-	-	-	-	-	-	-	yes	-	-	-	-	-	-	-	-	-	-	yes	-	-	-	-	-	-	-	-	-	-	-	-	-	-	-	39.03	8.77	0.9183
	JS-NGO-11s	JS-NGO-11s_250-500_1st	250-500	54	350	390	40	682500	-	-	-	-	-	-	-	-	-	-	-	-	-	-	-	-	-	-	-	-	-	yes	-	-	-	-	-	-	-	-	-	-	-	-	-	-	-	-	39.02	9.31	0.8474
	JS-NGO-11s	JS-NGO-11s_250-500_1st	250-500	55	280	340	40	476000	yes	-	-	-	-	-	-	-	-	-	-	yes	-	-	-	-	-	-	-	-	-	-	-	-	-	-	-	-	-	-	yes	-	-	-	-	-	-	-	38.36	5.59	1.85
	JS-NGO-11s	JS-NGO-11s_250-500_1st	250-500	56	340	560	40	952000	-	-	-	-	-	-	-	-	-	-	-	-	-	-	-	-	-	-	-	-	-	-	yes	-	-	-	-	-	-	-	-	-	-	-	-	-	-	-	39.37	9.98	1.1268
	JS-NGO-11s	JS-NGO-11s_250-500_1st	250-500	57	380	140	40	266000	-	-	-	-	-	-	-	-	-	-	-	-	-	-	-	-	-	-	-	-	-	-	yes	-	-	-	-	-	-	-	-	-	-	-	-	-	-	-	38.7	8.58	1.0375
	JS-NGO-11s	JS-NGO-11s_250-500_1st	250-500	58	240	280	40	336000	-	-	-	-	-	-	-	-	-	-	-	-	-	yes	-	-	-	-	-	-	-	-	-	-	-	-	-	-	-	-	-	-	-	-	-	-	-	-	38.48	7.63	1.1365
	JS-NGO-11s	JS-NGO-11s_250-500_1st	250-500	59	200	420	40	420000	-	-	-	-	-	-	-	-	-	-	-	yes	-	-	-	-	-	-	-	-	-	-	-	-	-	-	-	-	-	yes	-	-	-	-	-	-	-	-	38.69	7.26	1.3469
	JS-NGO-11s	JS-NGO-11s_250-500_1st	250-500	60	380	450	40	855000	-	-	-	yes	-	-	-	-	-	-	-	-	-	-	-	-	-	-	-	-	-	-	yes	-	-	-	yes	-	-	-	-	-	-	-	-	-	-	-	38.76	8.17	1.1347
	JS-NGO-11s	JS-NGO-11s_250-500_1st	250-500	61	300	280	40	420000	-	-	-	yes	-	-	-	-	-	-	-	-	-	-	-	-	-	-	-	-	-	-	-	-	-	-	yes	-	-	-	-	-	-	-	-	-	-	-	38.8	8.34	1.114
	JS-NGO-11s	JS-NGO-11s_250-500_1st	250-500	63	260	390	40	507000	-	-	-	yes	-	-	-	-	-	-	-	yes	-	-	-	-	-	-	-	-	-	-	-	-	-	-	-	-	-	-	-	-	-	-	-	-	-	-	38.2	5.61	1.2026
	JS-NGO-11s	JS-NGO-11s_250-500_1st	250-500	64	280	330	40	462000	-	-	-	-	-	-	-	-	-	-	-	-	-	-	-	-	-	-	-	-	-	-	yes	-	-	-	-	-	-	-	-	-	-	-	-	-	-	-	38.87	8.01	0.8876
	JS-NGO-11s	JS-NGO-11s_250-500_1st	250-500	65	480	400	40	960000	yes	-	-	-	-	-	-	-	-	-	-	-	-	-	-	-	-	-	-	-	-	-	-	-	-	-	-	-	-	-	-	-	-	-	-	-	-	-	38.17	6.45	1.2089
	JS-NGO-11s	JS-NGO-11s_250-500_1st	250-500	67	200	480	60	720000	yes	-	-	-	-	-	-	-	-	-	-	-	-	yes	-	yes	-	-	-	-	-	-	-	-	-	-	-	-	-	yes	-	-	-	-	-	yes	-	likely melt inclusion	38.73	7.74	1.1933
	JS-NGO-11s	JS-NGO-11s_250-500_1st	250-500	69	340	740	40	1258000	-	-	-	yes	-	-	-	-	-	-	-	yes	-	-	-	-	-	-	-	-	-	-	-	-	-	-	-	-	-	yes	-	-	-	-	-	-	-	carbonate + CO2	38.9	7.55	1.1748
	JS-NGO-11s	JS-NGO-11s_250-500_1st	250-500	70	250	290	40	362500	-	-	-	-	-	-	-	-	-	-	-	-	-	-	-	-	-	-	-	-	-	-	yes	-	-	-	yes	-	-	-	-	-	-	-	-	-	-	-	38.14	6.05	1.0379
	JS-NGO-11s	JS-NGO-11s_250-500_1st	250-500	71	370	360	40	666000	-	-	-	-	-	-	-	-	-	-	-	yes	-	-	-	-	-	-	-	-	-	-	-	-	-	-	yes	-	-	-	-	-	-	-	yes	-	-	-	38.33	6.25	1.19
	JS-NGO-11s	JS-NGO-11s_250-500_1st	250-500	72	200	400	40	400000	-	-	-	-	yes	-	-	-	-	-	-	-	-	-	-	yes	-	-	-	-	-	-	-	-	-	-	-	-	-	-	-	-	-	-	-	-	-	-	38.9	7.98	0.9349
	JS-NGO-11s	JS-NGO-11s_250-500_1st	250-500	73	360	430	40	774000	yes	-	-	-	-	-	-	-	-	-	-	-	-	-	-	-	-	-	-	-	-	-	-	-	-	-	-	-	-	-	-	-	-	-	-	-	-	-	39.01	7.78	1.68
	JS-NGO-11s	JS-NGO-11s_250-500_1st	250-500	74	340	320	40	544000	yes	-	-	-	yes	-	-	-	-	-	-	yes	-	-	-	-	-	-	-	-	-	-	-	-	-	-	-	-	-	-	yes	-	-	-	-	yes	-	-	38.54	5.27	3.82
	JS-NGO-11s	JS-NGO-11s_250-500_1st	250-500	75	220	400	40	440000	yes	-	-	-	-	-	-	-	-	-	-	-	-	-	-	-	-	-	-	-	-	-	-	-	-	-	-	-	-	-	-	-	-	-	-	-	-	-	38.41	6.34	2.32
	JS-NGO-11s	JS-NGO-11s_250-500_1st	250-500	76	300	200	40	300000	yes	-	-	-	-	-	-	-	-	-	-	-	-	-	-	-	-	-	-	-	-	-	-	-	-	-	-	-	-	yes	-	-	-	-	-	-	-	-	38.51	4.36	6.19
	JS-NGO-11s	JS-NGO-11s_250-500_1st	250-500	77	240	360	40	432000	-	-	-	-	-	-	-	-	-	-	-	yes	-	-	-	-	-	-	-	-	-	-	yes	-	-	-	-	-	-	-	-	-	-	-	-	-	-	-	39.3	8.92	1.1796
	JS-NGO-11s	JS-NGO-11s_250-500_1st	250-500	78	300	160	40	240000	-	-	-	-	-	-	-	-	-	-	-	-	-	-	-	-	-	-	-	-	-	-	yes	-	-	-	-	-	-	-	-	-	-	-	-	-	-	-	38.28	6.29	0.9204
	JS-NGO-11s	JS-NGO-11s_250-500_1st	250-500	79	200	220	40	220000	-	-	-	-	-	-	-	-	-	-	-	-	-	-	-	-	-	-	-	-	-	-	-	-	-	-	yes	-	-	-	-	-	-	-	-	-	-	-	38.32	5.46	1.85
	JS-NGO-11s	JS-NGO-11s_250-500_1st	250-500	80	260	150	40	195000	yes	-	-	-	-	-	-	-	-	-	-	-	-	-	-	-	-	-	-	-	-	-	-	-	-	-	-	-	-	-	-	-	-	-	-	-	-	-	38.04	4.29	2.82
	JS-NGO-11s	JS-NGO-11s_250-500_2nd	250-500	81	150	400	40	300000	yes	-	-	-	-	-	-	-	yes	-	-	-	-	yes	-	-	-	-	-	-	-	-	-	-	-	-	-	-	-	-	-	-	-	-	-	-	-	quartz + phlogopite-biotite + plagioclase + H2O	39.46	9.58	1.2323
	JS-NGO-11s	JS-NGO-11s_250-500_2nd	250-500	82	360	700	40	1260000	-	-	-	-	-	-	-	-	-	-	-	-	-	-	-	-	-	-	-	-	-	-	-	-	-	-	yes	-	-	-	-	yes	-	-	-	-	-	-	38.57	5.72	3.38
	JS-NGO-11s	JS-NGO-11s_250-500_2nd	250-500	83	380	470	40	893000	-	-	-	-	-	-	-	-	-	-	-	-	-	-	-	-	-	-	-	-	-	-	-	-	-	-	yes	yes	-	yes	-	-	-	-	yes	-	-	CO2	38.22	4.65	2.87
	JS-NGO-11s	JS-NGO-11s_250-500_2nd	250-500	84	260	430	40	559000	-	-	-	-	-	-	-	-	-	-	-	-	-	-	-	-	-	-	-	-	-	-	-	-	-	-	-	-	-	-	-	-	-	-	yes	-	-	-	37.48	1.85	4.7
	JS-NGO-11s	JS-NGO-11s_250-500_2nd	250-500	85	360	500	40	900000	-	-	-	yes	yes	-	-	-	-	-	-	-	-	-	-	-	-	-	-	-	-	-	yes	-	-	-	-	-	-	-	yes	-	-	-	-	-	-	-	38.99	8.23	0.9757
	JS-NGO-11s	JS-NGO-11s_250-500_2nd	250-500	86	300	430	40	645000	yes	-	-	-	-	-	-	-	-	-	-	-	-	-	-	-	-	-	-	-	-	-	-	-	-	-	-	-	-	-	-	-	-	-	-	-	-	-	38.67	6.15	1.93
	JS-NGO-11s	JS-NGO-11s_250-500_2nd	250-500	87	380	560	40	1064000	-	-	-	-	-	-	-	-	-	-	-	yes	-	-	-	-	-	-	-	-	-	-	-	-	-	-	-	-	-	-	-	-	-	-	-	-	-	-	39.24	8.39	1.101
	JS-NGO-11s	JS-NGO-11s_250-500_2nd	250-500	88	390	440	40	858000	-	-	-	yes	-	-	-	-	-	-	-	-	-	-	-	-	-	-	-	-	-	-	-	-	-	-	-	-	-	-	-	-	-	-	-	-	-	-	38.64	6.61	1.6
	JS-NGO-11s	JS-NGO-11s_250-500_2nd	250-500	89	290	220	40	319000	yes	-	-	-	-	-	-	-	-	-	-	yes	-	-	-	-	-	-	-	-	-	-	-	-	-	-	-	-	-	-	-	-	-	-	-	-	-	-	38.82	6.71	1.1474
	JS-NGO-11s	JS-NGO-11s_250-500_2nd	250-500	90	370	250	40	462500	yes	-	-	-	yes	-	-	-	-	-	-	-	-	-	-	-	-	-	-	-	-	-	-	-	-	-	-	-	-	-	-	-	-	-	yes	yes	-	-	38.32	5.7	1.1878
	JS-NGO-11s	JS-NGO-11s_250-500_2nd	250-500	91	300	300	40	450000	-	-	-	-	-	-	-	-	-	-	-	-	-	-	-	-	-	-	-	-	-	-	yes	-	-	-	-	-	-	-	-	-	-	-	-	-	-	-	38.55	6.62	1.0106
	JS-NGO-11s	JS-NGO-11s_250-500_2nd	250-500	92	250	500	40	625000	-	-	-	-	-	-	-	-	-	-	-	-	-	-	-	-	-	-	-	-	-	-	yes	-	-	-	-	-	-	-	-	-	-	-	-	-	-	-	38.82	7.86	1.1067
	JS-NGO-11s	JS-NGO-11s_250-500_2nd	250-500	93	180	260	40	234000	-	-	-	-	-	-	-	-	-	-	-	-	-	-	-	-	-	-	-	-	-	-	-	-	-	-	-	-	-	-	yes	-	-	-	-	-	-	-	38.76	7.66	0.9202
	JS-NGO-11s	JS-NGO-11s_250-500_2nd	250-500	94	350	260	40	455000	yes	-	-	-	-	-	-	-	-	-	-	-	-	-	-	-	-	-	-	-	-	-	-	-	-	-	-	-	-	-	-	-	-	-	-	-	-	-	38.89	7.56	1.3844
	JS-NGO-11s	JS-NGO-11s_250-500_2nd	250-500	95	290	370	40	536500	-	-	-	-	-	-	-	-	-	-	-	-	-	-	-	-	-	-	-	-	-	-	yes	-	-	-	-	-	-	-	-	-	-	-	-	-	-	-	38.62	7.62	0.9143
	JS-NGO-11s	JS-NGO-11s_250-500_2nd	250-500	96	330	310	40	511500	yes	-	-	-	-	-	-	-	-	-	-	-	-	-	-	-	-	-	-	-	-	-	-	-	-	-	-	-	-	-	-	-	-	-	yes	-	-	CO2	38.22	4.95	1.2553
	JS-NGO-11s	JS-NGO-11s_250-500_2nd	250-500	97	590	280	40	826000	yes	-	-	-	-	-	-	-	-	-	-	-	-	-	-	-	-	-	-	-	-	-	-	-	-	-	yes	-	-	-	yes	-	-	-	-	-	-	-	39.23	8.35	1.67
	JS-NGO-11s	JS-NGO-11s_250-500_2nd	250-500	98	340	140	40	238000	-	-	-	-	-	-	-	-	-	-	-	-	-	-	-	-	-	-	-	-	-	-	-	-	-	-	yes	-	-	-	-	-	-	-	-	-	-	-	37.91	2.9	3.06
	JS-NGO-11s	JS-NGO-11s_250-500_2nd	250-500	99	320	440	40	704000	-	-	-	-	-	-	-	-	-	-	-	-	-	-	-	-	-	-	-	-	-	-	yes	-	-	-	-	-	-	-	-	-	-	-	-	-	-	-	39.04	7.96	1.1065
	JS-NGO-11s	JS-NGO-11s_250-500_2nd	250-500	100	200	280	40	280000	yes	-	-	-	-	-	-	-	-	-	-	yes	-	-	-	-	-	-	-	-	-	-	-	-	-	-	-	-	-	-	-	-	-	-	yes	yes	-	-	38.53	5.6	2.5
	JS-NGO-11s	JS-NGO-11s_250-500_2nd	250-500	101	340	300	40	510000	-	-	-	yes	-	-	-	-	-	-	-	-	-	-	-	-	-	-	-	-	-	-	-	-	-	-	-	yes	-	-	-	-	-	-	-	-	-	-	38.85	6.64	1.56
	JS-NGO-11s	JS-NGO-11s_250-500_2nd	250-500	102	380	380	40	722000	-	-	-	-	-	-	-	-	-	-	-	-	-	-	-	-	-	-	-	-	-	-	yes	-	-	-	-	-	-	-	-	-	-	-	-	-	-	-	38.88	7.87	1.0344
	JS-NGO-11s	JS-NGO-11s_250-500_2nd	250-500	103	200	360	40	360000	-	-	-	-	-	-	-	-	-	-	-	-	-	-	-	-	-	-	-	-	-	-	yes	-	-	-	yes	-	-	-	-	-	-	-	-	-	-	-	38.86	8.27	0.8094
	JS-NGO-11s	JS-NGO-11s_250-500_2nd	250-500	104	400	230	40	460000	-	-	-	yes	-	-	-	-	-	-	-	-	-	-	-	-	-	-	-	-	-	-	yes	-	-	-	-	-	-	-	-	-	-	-	-	-	-	-	39.48	8.93	0.8817
	JS-NGO-11s	JS-NGO-11s_250-500_2nd	250-500	105	280	340	40	476000	-	-	-	-	-	-	-	-	-	-	-	-	-	-	-	-	-	-	-	-	-	-	-	-	-	-	yes	-	-	-	-	-	-	-	-	-	-	-	38.89	6.82	1.79
	JS-NGO-11s	JS-NGO-11s_250-500_2nd	250-500	106	280	360	40	504000	-	-	-	-	-	-	-	-	-	-	-	-	-	-	-	-	-	-	-	-	-	-	yes	-	-	-	-	-	-	-	-	-	-	-	-	-	-	-	38.98	7.78	1.2966
	JS-NGO-11s	JS-NGO-11s_250-500_2nd	250-500	107	370	350	40	647500	yes	-	-	-	-	-	-	-	-	-	-	-	-	-	-	-	-	-	-	-	-	-	-	-	-	-	yes	-	-	-	-	-	-	-	yes	-	-	-	37.92	3.78	2.91
	JS-NGO-11s	JS-NGO-11s_250-500_2nd	250-500	108	360	230	40	414000	yes	-	-	-	-	-	-	-	-	-	-	-	-	-	-	-	-	-	-	-	-	-	-	-	-	-	yes	-	-	-	-	-	-	-	-	yes	-	-	38.63	3.93	5.78
	JS-NGO-16s	NGO-HM2	63-125	1	80	140	32	44800	-	-	-	-	-	-	-	-	-	-	-	-	-	-	-	-	-	-	-	-	-	-	yes	yes	-	-	-	-	-	-	-	-	-	-	-	-	-	-	38.85	8.88	1.1949
	JS-NGO-16s	NGO-HM2	63-125	2	80	90	12	10800	-	-	-	-	-	-	-	-	-	-	-	-	-	-	-	-	-	-	-	-	-	-	yes	-	-	-	-	-	-	-	-	-	-	-	-	-	-	-	38.68	7.96	1.0843
	JS-NGO-16s	NGO-HM2	63-125	3	110	130	30	53625	-	-	-	-	-	-	-	-	-	-	-	-	-	-	-	-	-	-	-	-	-	-	yes	-	-	-	-	-	-	-	-	-	-	-	-	-	-	-	38.45	7.65	1.1738
	JS-NGO-16s	NGO-HM2	63-125	4	80	130	40	52000	-	-	-	-	-	-	-	-	-	-	-	-	-	-	-	-	-	-	-	-	-	-	-	-	-	-	yes	-	-	-	-	-	-	-	-	-	-	-	38.6	8.78	0.8376
	JS-NGO-16s	NGO-HM2	63-125	5	60	210	26	40950	-	-	-	-	-	-	-	-	-	-	-	-	-	-	-	-	-	-	-	-	-	-	-	-	-	-	yes	-	-	-	-	-	-	-	-	-	-	-	38.79	9.2	1.1137
	JS-NGO-16s	NGO-HM2	63-125	6	70	80	24	16800	-	-	-	-	-	-	-	-	-	-	-	-	-	-	-	-	-	-	-	-	-	-	yes	-	-	-	-	-	-	-	-	-	-	-	-	-	-	-	39.4	10.69	1.203
	JS-NGO-16s	NGO-HM2	63-125	7	100	80	20	20000	-	-	-	-	-	-	-	-	-	-	-	-	-	yes	-	-	-	-	-	-	-	-	-	-	-	-	-	-	-	-	-	-	-	-	-	-	-	-	38.22	4.86	6.67
	JS-NGO-16s	NGO-HM2	63-125	8	70	60	26	13650	-	-	-	-	-	-	-	-	-	-	-	-	-	-	-	-	-	-	-	-	-	-	-	yes	-	-	-	-	-	-	-	-	-	-	-	-	-	-	38.74	8.28	0.741
	JS-NGO-16s	NGO-HM2	63-125	9	70	40	22	7700	-	-	-	-	-	-	-	-	-	-	-	-	-	yes	-	-	-	-	-	-	-	-	-	-	-	-	-	-	-	-	-	-	-	-	-	-	-	-	37.75	2.9	7.45
	JS-NGO-16s	NGO-HM2	63-125	10	180	140	28	88200	-	-	-	yes	-	-	-	-	-	-	-	-	-	-	-	-	-	-	-	-	-	-	yes	-	-	-	yes	-	-	-	-	-	-	-	-	-	-	-	38.5	8.66	1.0494
	JS-NGO-16s	NGO-HM2	63-125	11	50	100	34	21250	-	-	-	-	-	-	-	-	-	-	-	-	-	-	-	-	-	-	-	-	-	-	-	-	-	-	-	-	-	-	-	-	-	-	yes	-	yes	CO2	38.54	6.26	3.1
	JS-NGO-16s	NGO-HM2	63-125	12	50	60	20	7500	yes	-	-	-	-	-	-	-	-	-	-	-	-	-	-	-	-	-	-	-	-	-	-	-	-	-	-	-	-	-	-	-	-	-	-	-	-	-	37.54	2.53	7.09
	JS-NGO-16s	NGO-HM2	63-125	13	120	130	34	66300	-	-	-	-	-	-	-	-	-	-	-	-	-	-	-	-	-	-	-	-	-	-	yes	-	-	-	-	-	-	-	-	-	-	-	-	-	-	-	38.67	9.46	1.1728
	JS-NGO-16s	NGO-HM2	63-125	14	100	200	26	65000	-	-	-	-	-	-	-	-	-	-	-	-	-	-	-	-	-	-	-	-	-	-	yes	-	-	-	-	-	-	-	-	-	-	-	-	-	-	-	39.25	9.7	1.0522
	JS-NGO-16s	NGO-HM2	63-125	15	180	60	40	54000	-	-	-	-	-	-	-	-	-	-	-	-	-	-	-	-	-	-	-	-	-	-	yes	-	-	-	-	-	-	-	-	-	-	-	-	-	-	-	38.69	8.38	1.2089
	JS-NGO-16s	NGO-HM2	63-125	16	70	60	20	10500	yes	-	-	-	-	-	-	-	-	-	-	-	-	-	-	-	-	-	-	-	-	-	-	-	-	-	-	-	-	-	-	-	-	-	yes	-	-	-	38.61	5.54	5.71
	JS-NGO-16s	NGO-HM2	63-125	17	90	150	30	50625	-	-	-	-	-	-	-	-	-	-	-	yes	-	-	-	-	-	-	-	-	-	-	-	-	-	-	-	-	-	-	-	-	-	-	-	-	-	-	38.38	6.35	3.92
	JS-NGO-16s	NGO-HM2	63-125	18	40	60	20	6000	yes	-	-	-	-	-	-	-	yes	-	-	-	-	yes	-	-	-	-	-	-	-	-	-	-	-	-	-	-	-	-	-	-	-	-	-	-	-	-	37.75	2.1	8.98
	JS-NGO-16s	NGO-HM2	63-125	19	80	130	18	23400	-	-	-	-	-	-	-	-	-	-	-	-	-	-	-	-	-	-	-	-	-	-	yes	-	-	-	-	-	-	-	-	-	-	-	-	-	-	-	38.53	8.42	1.3649
	JS-NGO-16s	NGO-HM2	63-125	20	180	100	40	90000	-	-	-	-	-	-	-	-	-	-	-	-	-	-	-	-	-	-	-	-	-	-	yes	-	-	-	-	-	-	-	-	-	-	-	-	-	-	-	39.4	11.49	1.179
	JS-NGO-16s	NGO-HM2	63-125	21	140	100	40	70000	yes	-	-	-	-	-	-	-	-	-	-	-	-	-	-	-	-	-	-	-	-	-	-	-	-	-	-	-	-	-	-	-	-	-	-	-	-	-	38.12	6.83	0.8325
	JS-NGO-16s	NGO-HM2	63-125	22	90	60	20	13500	-	-	-	yes	-	-	-	-	-	-	-	-	-	-	-	-	-	-	-	-	-	-	-	-	-	-	-	-	-	-	-	-	-	-	-	-	-	-	39.11	8.14	7.03
	JS-NGO-16s	NGO-HM2	63-125	23	140	150	20	52500	-	-	-	-	-	-	-	-	-	-	-	-	-	-	-	-	-	-	-	-	-	-	-	yes	-	-	-	-	-	-	-	-	-	-	-	-	-	-	38.94	9.63	1.3075
	JS-NGO-16s	NGO-HM2	63-125	24	80	40	14	5600	-	-	-	-	-	-	-	-	-	-	-	-	-	-	-	-	-	-	-	-	-	-	-	yes	-	-	-	-	-	-	-	-	-	-	-	-	-	-	38.74	8.72	0.9081
	JS-NGO-16s	NGO-HM2	63-125	25	80	60	18	10800	yes	-	-	-	-	-	-	-	-	-	-	-	-	-	-	-	-	-	-	-	-	-	-	-	-	-	-	-	-	-	-	-	-	-	-	-	-	-	37.74	3.26	7.14
	JS-NGO-16s	NGO-HM2	63-125	26	70	170	14	20825	-	-	-	-	-	-	-	-	-	-	-	-	-	-	-	-	-	-	-	-	-	-	-	-	-	-	-	-	-	-	-	-	-	-	-	yes	-	-	38.16	4.7	5.73
	JS-NGO-16s	NGO-HM2	63-125	27	70	60	20	10500	-	-	-	-	-	-	-	-	-	-	-	-	-	-	-	-	-	-	-	-	-	-	yes	-	-	-	-	-	-	-	-	-	-	-	-	-	-	-	36.74	1.81	1.1536
	JS-NGO-16s	NGO-HM2	63-125	28	30	90	8	2700	yes	-	-	-	-	-	-	-	-	-	-	-	-	-	-	-	-	-	-	-	-	-	-	-	-	-	-	-	-	-	yes	-	-	-	-	-	-	-	38.58	5.72	6.91
	JS-NGO-16s	NGO-HM2	63-125	29	110	50	10	6875	-	-	-	-	-	-	-	-	-	-	-	-	-	-	-	-	-	-	-	-	-	-	yes	-	-	-	-	-	-	-	-	-	-	-	-	-	-	-	39.18	10	1.3062
	JS-NGO-16s	NGO-HM2	63-125	30	90	120	20	27000	yes	-	-	-	-	-	-	-	-	-	-	-	-	-	-	-	-	-	-	-	-	-	-	-	-	-	-	-	-	-	-	-	-	-	-	-	-	-	37.12	0.7068	9.48
	JS-NGO-16s	NGO-HM2	63-125	31	80	50	16	8000	-	-	-	-	-	-	-	-	yes	-	-	-	-	-	-	-	-	-	-	-	-	-	-	-	-	-	-	-	-	yes	-	-	-	-	-	-	-	-	37.46	1.67	10.49
	JS-NGO-16s	NGO-HM2	63-125	32	50	150	10	9375	-	-	-	-	-	-	-	-	-	-	-	-	-	-	-	-	-	-	-	-	-	-	yes	yes	-	-	-	-	-	-	-	-	-	-	-	-	-	-	38.34	7.6	1.58
	JS-NGO-16s	NGO-HM2	63-125	33	70	100	14	12250	-	-	-	-	-	-	-	-	-	-	-	-	-	-	-	-	-	-	-	-	-	-	yes	-	-	-	-	-	-	-	-	-	-	-	-	-	-	-	38.62	8.08	1.2313
	JS-NGO-16s	NGO-HM2	63-125	34	50	160	24	24000	-	-	-	-	-	-	-	-	-	-	-	-	-	-	-	-	-	-	-	-	-	-	yes	-	-	-	-	-	-	-	-	-	-	-	-	-	-	-	38.71	9.21	1.2092
	JS-NGO-16s	NGO-HM2	63-125	35	40	80	8	3200	yes	-	-	-	-	-	-	-	-	-	-	-	-	-	-	-	-	-	-	-	-	-	-	-	-	-	-	-	-	-	-	-	-	-	-	-	-	-	38.25	7.04	1.61
	JS-NGO-16s	NGO-HM2	63-125	36	80	70	20	14000	yes	-	-	-	-	-	-	-	-	-	-	-	-	-	-	-	-	-	-	-	-	-	-	-	-	-	-	-	-	-	-	-	-	-	-	-	-	-	37.55	3.05	6.01
	JS-NGO-16s	NGO-HM2	63-125	37	70	60	16	8400	-	-	-	-	-	-	-	-	-	-	-	-	-	-	-	-	-	-	-	-	-	-	yes	-	-	-	-	-	-	-	-	-	-	-	-	-	-	-	38.8	8.88	1.1122
	JS-NGO-16s	NGO-HM2	63-125	38	60	60	20	9000	-	-	-	-	-	-	-	-	-	-	-	-	-	-	-	-	-	-	-	-	-	-	yes	-	-	-	-	-	-	-	-	-	-	-	-	-	-	-	38.83	9.03	0.9818
	JS-NGO-16s	NGO-HM2	63-125	39	90	80	30	27000	-	-	-	-	-	-	-	-	yes	-	-	-	-	-	-	-	-	-	-	-	-	-	-	-	-	-	-	-	-	-	yes	-	-	-	-	-	-	-	39.1	7.5	8.02
	JS-NGO-16s	NGO-HM2	63-125	40	20	30	2	150	-	-	-	-	-	-	-	-	-	-	-	-	yes	-	-	-	-	-	-	-	-	-	-	-	-	-	-	-	-	yes	-	-	-	-	-	-	yes	muscovite-paragonite + carbonate + CO2	38.19	7.62	0.8262
	JS-NGO-16s	NGO-HM2	63-125	41	110	130	10	17875	-	-	-	-	-	-	-	-	-	-	-	-	-	-	-	-	-	-	-	-	-	-	yes	-	-	-	-	-	-	-	-	-	-	-	-	-	-	-	38.4	7.16	1.0548
	JS-NGO-16s	NGO-HM2	63-125	42	120	60	12	10800	yes	-	-	-	-	yes	-	-	-	-	-	-	-	-	-	-	-	-	-	-	-	-	-	-	-	-	-	-	-	-	-	-	-	-	-	-	-	-	39	9.5	1.327
	JS-NGO-16s	NGO-HM2	63-125	43	70	100	14	12250	-	-	-	-	-	-	-	-	-	-	-	-	-	-	-	-	-	-	-	-	-	-	yes	-	-	-	-	-	-	-	-	-	-	-	-	-	-	-	38.72	9.12	1.2196
	JS-NGO-16s	NGO-HM2	63-125	44	150	140	16	42000	-	-	-	yes	-	-	-	-	-	-	-	-	-	-	-	-	-	-	-	-	-	-	-	-	-	-	-	-	-	-	-	-	-	-	-	-	-	-	38.22	7.09	1.2289
	JS-NGO-16s	NGO-HM2	63-125	45	130	130	20	42250	-	-	-	-	-	-	-	-	-	-	-	-	-	-	-	-	-	-	-	-	-	-	yes	-	-	-	-	-	-	-	-	-	-	-	-	-	-	-	38.56	7.16	1.1681
	JS-NGO-16s	NGO-HM2	63-125	46	150	110	30	61875	-	-	-	-	-	-	-	-	-	-	-	-	-	-	-	-	-	-	-	-	-	-	-	yes	-	-	-	-	-	-	-	-	-	-	-	-	-	-	38.81	9.29	1.0933
	JS-NGO-16s	NGO-HM2	63-125	47	150	120	16	36000	-	-	-	-	-	-	-	-	-	-	-	-	-	-	-	-	-	-	-	-	-	-	yes	-	-	-	-	-	-	-	-	-	-	-	-	-	-	-	38.82	8.59	1.0689
	JS-NGO-16s	NGO-HM2	63-125	48	50	50	6	1875	-	-	-	-	-	-	-	-	-	-	-	-	-	-	-	-	-	-	-	-	-	-	yes	-	-	-	-	-	-	-	-	-	-	-	-	-	-	-	38.97	9.58	1.2245
	JS-NGO-16s	NGO-HM2	63-125	49	50	130	30	24375	-	-	-	yes	-	-	-	-	-	-	-	-	-	-	-	-	-	-	-	-	-	-	-	-	-	-	-	-	-	yes	-	-	-	-	-	-	-	-	38.53	5.84	7.82
	JS-NGO-16s	NGO-HM2	63-125	50	120	80	30	36000	yes	-	-	-	-	-	-	-	-	-	-	-	-	-	-	-	-	-	yes	-	-	-	-	-	-	-	-	-	-	-	-	-	-	-	-	-	-	-	38.37	3.47	9.9
	JS-NGO-16s	NGO-HM2	63-125	51	100	130	20	32500	-	-	-	-	-	-	-	-	-	-	-	-	-	-	-	-	-	-	-	-	-	-	yes	-	-	-	-	-	-	-	-	-	-	-	-	-	-	-	38.5	8.72	1.1059
	JS-NGO-16s	NGO-HM2	63-125	52	100	90	36	40500	yes	-	-	-	-	-	-	-	yes	-	-	-	-	-	-	-	-	-	-	-	-	-	-	-	-	-	-	-	-	-	-	-	-	-	-	-	-	-	38.62	5.87	6.71
	JS-NGO-16s	NGO-HM2	63-125	53	90	60	18	12150	-	-	-	-	-	-	-	-	-	-	-	-	-	-	-	-	-	-	-	-	-	-	yes	-	-	-	-	-	-	-	-	-	-	-	-	yes	-	-	38.68	9.69	1.2685
	JS-NGO-16s	NGO-HM2	63-125	54	110	80	14	15400	-	-	-	-	-	-	-	-	-	-	-	-	-	yes	-	-	-	-	-	-	-	-	yes	-	-	-	-	-	-	-	-	-	-	-	-	-	-	-	38.78	8.69	1.166
	JS-NGO-16s	NGO-HM2	63-125	55	70	60	24	12600	-	-	-	-	-	-	-	-	-	-	-	-	-	-	-	-	-	-	-	-	-	-	yes	-	-	-	-	-	-	-	-	-	-	-	-	-	-	-	38.77	8.92	1.1531
	JS-NGO-16s	NGO-HM2	63-125	56	100	80	22	22000	-	-	-	-	-	-	-	-	-	-	-	-	-	-	-	-	-	-	-	-	-	-	yes	-	-	-	-	-	-	-	-	-	-	-	-	-	-	-	38.82	8.62	1.0354
	JS-NGO-16s	NGO-HM2	63-125	57	110	120	28	46200	yes	-	-	-	-	-	-	-	-	-	-	-	-	-	-	-	-	-	-	-	-	-	-	-	-	-	-	-	-	-	-	-	-	-	-	-	-	-	38.13	3.96	6.7
	JS-NGO-16s	NGO-HM2	63-125	58	150	20	6	2250	-	-	-	yes	-	-	-	-	-	-	-	-	-	-	-	-	-	-	-	-	-	-	-	-	-	-	-	-	-	-	-	-	-	-	-	-	-	-	39.02	9.69	1.1969
	JS-NGO-16s	NGO-HM2	63-125	59	80	120	20	24000	-	-	-	-	-	-	-	-	-	-	-	-	-	-	-	-	-	-	-	-	-	-	-	yes	-	-	-	-	-	-	-	-	-	-	-	-	-	-	38.97	10.79	1.3515
	JS-NGO-16s	NGO-HM2	63-125	60	70	70	16	9800	-	-	-	-	-	-	-	-	-	-	-	-	-	-	-	-	-	-	-	-	-	-	yes	-	-	-	-	-	-	-	-	-	-	-	-	-	-	-	38.6	8.46	1.0847
	JS-NGO-16s	NGO-HM2	63-125	61	80	80	12	9600	-	-	-	-	-	-	-	-	-	-	-	-	-	-	-	-	-	-	-	-	-	-	-	-	-	-	-	-	-	-	yes	-	-	-	-	-	-	-	38.16	3.45	8.81
	JS-NGO-16s	NGO-HM2	63-125	62	80	90	20	18000	-	-	-	-	-	-	-	-	-	-	-	-	-	-	-	-	-	-	-	-	-	-	yes	-	-	-	-	-	-	-	-	-	-	-	-	-	-	-	38.57	7.32	1.0801
	JS-NGO-16s	NGO-HM2	63-125	63	70	100	18	15750	-	-	-	-	-	-	-	-	-	-	-	-	-	-	-	-	-	-	-	-	-	-	yes	-	-	-	-	-	-	-	-	-	-	-	-	-	-	-	38.76	9.56	1.1562
	JS-NGO-16s	NGO-HM2	63-125	64	70	60	14	7350	yes	-	-	-	yes	-	-	-	-	-	-	-	-	-	-	-	-	-	-	-	-	-	-	-	-	-	yes	-	-	-	-	-	-	-	-	-	-	-	38.71	4.5	9.56
	JS-NGO-16s	NGO-HM2	63-125	65	90	80	12	10800	-	-	-	-	-	-	-	-	-	-	-	-	-	-	-	-	-	-	-	-	-	-	yes	-	-	-	-	-	-	-	-	-	-	-	-	-	-	-	38.19	6.87	1.1814
	JS-NGO-16s	NGO-HM2	63-125	66	120	70	24	25200	-	-	-	-	-	-	-	-	-	-	-	-	-	-	-	-	-	-	-	-	-	-	yes	-	-	-	-	-	-	-	-	-	-	-	-	-	-	-	38.7	8.3	1.2123
	JS-NGO-16s	NGO-HM2	63-125	68	100	50	22	13750	-	-	-	-	-	-	-	-	-	-	-	-	-	-	-	-	-	-	-	-	-	-	-	-	-	-	-	-	yes	-	-	-	-	-	-	-	-	-	38.6	7.86	0.819
	JS-NGO-16s	NGO-HM2	63-125	69	70	120	20	21000	-	-	-	-	-	-	-	-	-	-	-	-	-	-	-	-	-	-	-	-	-	-	yes	-	-	-	-	-	-	-	-	-	-	-	-	-	-	-	38.58	8.45	1.1764
	JS-NGO-16s	NGO-HM2	63-125	70	120	120	26	46800	-	-	-	-	-	-	-	-	-	-	-	-	-	-	-	-	-	-	-	-	-	-	yes	-	-	-	-	-	-	-	-	-	-	-	-	-	-	-	38.79	9.38	1.0297
	JS-NGO-16s	NGO-HM2	63-125	71	130	100	26	42250	-	-	-	-	-	-	-	-	-	-	-	yes	-	-	-	-	-	-	-	-	-	-	-	-	-	-	-	-	-	-	-	-	-	-	-	-	-	-	38.4	7.5	1.96
	JS-NGO-16s	NGO-HM2	63-125	72	130	120	20	39000	yes	-	-	-	-	-	-	-	-	-	-	-	-	-	-	-	-	-	-	-	-	-	-	-	-	-	-	-	-	-	-	-	-	-	-	-	-	-	37.69	2.72	8.61
	JS-NGO-16s	NGO-HM2	63-125	73	90	90	10	10125	-	-	-	-	-	-	-	-	-	-	-	-	-	-	-	-	yes	-	-	-	-	-	-	-	-	-	-	-	-	-	-	-	-	-	-	-	-	-	38.32	5.73	6.6
	JS-NGO-16s	NGO-HM2	63-125	74	30	70	22	5775	yes	-	-	-	-	-	-	-	-	-	-	-	-	-	-	-	-	-	-	-	-	-	-	-	-	-	-	-	-	-	-	-	-	-	-	-	-	-	37.08	0.4611	7.67
	JS-NGO-16s	NGO-HM2	63-125	75	80	60	20	12000	yes	-	-	-	-	-	-	-	-	-	-	-	-	-	-	-	-	-	-	-	-	-	-	-	-	-	-	-	-	-	-	-	-	-	yes	-	-	-	38.16	4.36	8.68
	JS-NGO-16s	NGO-HM2	63-125	76	60	140	24	25200	-	-	-	-	-	-	-	-	-	-	-	-	-	-	-	-	-	-	-	-	-	-	yes	-	-	-	-	-	-	-	-	-	-	-	-	-	-	-	38.16	7.58	1.0146
	JS-NGO-16s	NGO-HM2	63-125	77	80	60	18	10800	yes	-	-	-	-	-	-	-	-	-	-	-	-	-	-	-	-	-	-	-	-	-	-	-	-	-	-	-	-	-	-	-	-	-	-	-	yes	CO2	38.3	4.39	7.13
	JS-NGO-16s	NGO-HM2	63-125	78	70	70	32	19600	-	-	-	-	-	-	-	-	-	-	-	-	-	-	-	-	-	-	-	-	-	-	-	-	-	-	-	-	-	-	-	-	-	-	-	yes	-	-	37.44	3.16	7.66
	JS-NGO-16s	NGO-HM2	63-125	79	90	120	30	40500	-	-	-	-	-	-	-	-	-	-	-	-	-	-	-	-	-	-	-	-	-	-	-	-	-	-	yes	-	-	-	-	-	-	-	-	-	-	-	37.75	4.47	1.98
	JS-NGO-16s	NGO-HM2	63-125	80	90	90	18	18225	-	-	-	-	-	-	-	-	-	-	-	yes	-	-	-	-	-	-	-	-	-	-	yes	-	-	-	yes	-	-	-	-	-	-	-	-	-	-	-	38.42	8.04	0.9839
	JS-NGO-16s	NGO-HM2	63-125	81	110	110	6	9075	-	-	-	-	-	-	-	-	-	-	-	-	-	-	-	-	-	-	-	-	-	-	yes	-	-	-	-	-	-	-	-	-	-	-	-	-	-	-	38.85	9.32	1.0613
	JS-NGO-16s	NGO-HM2	63-125	82	90	120	22	29700	-	-	-	-	-	-	-	-	-	-	-	-	-	-	-	-	-	-	-	-	-	-	yes	-	-	-	-	-	-	-	-	-	-	-	-	-	-	-	38.68	8.25	1.1542
	JS-NGO-16s	NGO-HM2	63-125	83	120	100	10	15000	-	-	-	yes	-	-	-	-	-	-	-	-	-	-	-	-	-	-	-	-	-	-	-	-	-	-	-	-	-	-	-	-	-	-	-	-	-	-	38.96	9.44	1.1861
	JS-NGO-16s	NGO-HM2	63-125	84	300	100	20	75000	-	-	-	-	-	-	-	-	-	-	-	-	-	-	-	-	-	-	-	-	-	-	yes	-	-	-	-	-	-	-	-	-	-	-	-	-	-	-	38.51	7.89	1.2457
	JS-NGO-16s	NGO-HM2	63-125	85	80	80	20	16000	yes	-	-	-	-	-	-	-	-	-	-	-	-	-	-	-	-	-	-	-	-	-	-	-	-	-	-	-	-	-	-	-	-	-	-	-	-	-	38.19	4.54	7.28
	JS-NGO-16s	NGO-HM2	63-125	86	80	120	18	21600	-	-	-	-	-	-	-	-	-	-	-	-	-	-	-	-	-	-	-	-	-	-	yes	-	-	-	-	-	-	-	-	-	-	-	-	-	-	-	38.86	8.54	1.2759
	JS-NGO-16s	NGO-HM2	63-125	87	140	50	6	5250	-	-	-	-	-	-	-	-	-	-	-	-	-	-	-	-	-	-	-	-	-	-	yes	-	-	-	-	-	-	-	-	-	-	-	-	-	-	-	38.43	7.7	1.0704
	JS-NGO-16s	NGO-HM2	63-125	88	100	200	24	60000	-	-	-	-	-	-	-	-	-	-	-	-	-	-	-	-	-	-	-	-	-	-	yes	-	-	-	-	-	-	-	-	-	-	-	-	-	-	-	38.9	9.94	1.1233
	JS-NGO-16s	NGO-HM2	63-125	89	80	80	28	22400	yes	-	-	-	-	-	-	-	-	-	-	-	-	-	-	-	-	-	-	-	-	-	-	-	-	-	-	-	-	-	-	-	-	-	-	-	-	-	37.74	3.35	6.85
	JS-NGO-16s	NGO-HM2	63-125	90	90	110	30	37125	-	-	-	-	-	-	-	-	-	-	-	-	-	-	-	-	-	-	-	-	-	-	yes	-	-	-	-	-	-	-	-	-	-	-	-	-	-	-	38.14	6.46	0.97
	JS-NGO-16s	NGO-HM2	63-125	91	160	110	22	48400	-	-	-	-	-	-	-	-	-	-	-	-	-	-	-	-	-	-	-	-	-	-	-	-	-	-	-	yes	-	-	-	-	-	-	-	-	-	-	39.15	9.75	0.9596
	JS-NGO-16s	NGO-HM2	63-125	92	140	110	18	34650	yes	-	-	-	-	-	-	-	-	-	-	-	-	-	-	-	-	-	-	-	-	-	-	-	-	-	-	-	-	-	-	-	-	-	-	yes	-	in contact to augite-diopside	37.89	3.74	7.68
	JS-NGO-16s	NGO-HM2	63-125	93	150	150	4	11250	-	-	-	-	-	-	-	-	-	-	-	-	-	-	-	-	-	-	-	-	-	-	-	-	-	-	yes	-	-	-	-	-	-	-	-	-	-	-	39.03	9.45	1.1231
	JS-NGO-16s	NGO-HM2	63-125	94	100	60	18	13500	yes	-	-	-	-	-	-	-	-	-	-	-	-	-	-	-	-	-	-	-	-	-	-	-	-	-	-	-	-	-	-	-	-	-	-	-	-	-	38.15	4.09	8.77
	JS-NGO-16s	NGO-HM2	63-125	95	130	120	20	39000	-	-	-	-	-	-	-	-	-	-	-	-	-	-	-	-	-	-	-	-	-	-	yes	-	-	-	-	-	-	-	-	-	-	-	-	-	-	-	38.69	8.64	1.146
	JS-NGO-16s	NGO-HM2	63-125	96	170	190	18	72675	-	-	-	-	yes	-	-	-	-	-	-	-	-	-	-	-	-	-	-	-	-	-	yes	-	-	-	-	-	-	-	-	-	-	-	-	-	-	-	39.08	9.72	1.267
	JS-NGO-16s	NGO-HM2	63-125	97	80	80	40	32000	-	-	-	yes	-	-	-	-	-	-	-	-	-	-	-	-	-	-	-	-	-	-	yes	-	-	-	-	-	-	-	-	-	-	-	-	-	-	-	38.4	6.89	0.9565
	JS-NGO-16s	NGO-HM2	63-125	98	60	140	20	21000	yes	-	-	-	-	-	-	-	-	-	-	-	-	-	-	-	-	-	-	-	-	-	-	-	-	-	-	-	-	-	-	-	-	-	-	yes	-	-	38.56	5.01	6.77
	JS-NGO-16s	NGO-HM2	63-125	99	70	90	26	20475	-	-	-	-	-	-	-	-	-	-	-	-	-	-	-	-	-	-	-	-	-	-	-	-	-	-	-	-	-	-	yes	yes	-	-	-	-	-	-	38.76	5.88	7.78
	JS-NGO-16s	NGO-HM2	63-125	100	90	160	24	43200	yes	-	-	-	-	-	-	-	-	-	-	-	-	-	-	-	-	-	-	-	-	-	-	-	-	-	-	-	-	-	-	-	-	-	-	-	-	-	38.8	9.49	1.0707
	JS-NGO-16s	NGO-HM2	63-125	101	80	130	12	15600	-	-	-	-	-	-	-	-	-	-	-	-	-	-	-	-	-	-	-	-	-	-	yes	-	-	-	-	-	-	-	-	-	-	-	-	-	-	-	38.71	8.11	1.1751
	JS-NGO-16s	NGO-HM2	63-125	102	80	80	22	17600	-	-	-	-	-	-	-	-	-	-	-	-	-	-	-	-	-	-	-	-	-	-	yes	-	-	-	-	-	-	-	-	-	-	-	-	-	-	-	38.23	8.42	1.0396
	JS-NGO-16s	NGO-HM2	63-125	103	80	60	20	12000	yes	-	-	-	-	-	-	-	-	-	-	-	-	-	-	-	-	-	-	-	-	-	-	-	-	-	-	-	-	-	-	-	-	-	-	-	-	-	37.7	3.27	7.04
	JS-NGO-16s	NGO-HM2	63-125	104	90	90	20	20250	-	-	-	-	-	-	-	-	-	-	-	-	-	-	-	-	-	-	-	-	-	-	yes	-	-	-	-	-	-	-	-	-	-	-	-	-	-	-	38.85	9.69	1.1749
	JS-NGO-16s	NGO-HM2	63-125	105	80	100	12	12000	-	-	-	-	-	-	-	-	-	-	-	-	-	-	-	-	-	-	-	-	-	-	yes	-	-	-	-	-	-	-	-	-	-	-	-	-	-	-	38.74	9.17	1.1313
	JS-NGO-16s	NGO-HM4	125-250	1	180	90	30	60750	-	-	-	-	-	-	-	-	-	-	-	-	-	-	-	-	-	-	-	-	-	-	yes	-	-	-	-	-	-	-	-	-	-	-	-	-	-	-	38.74	7.66	1.1785
	JS-NGO-16s	NGO-HM4	125-250	2	160	280	40	224000	-	-	-	-	-	-	-	-	-	-	-	yes	-	-	-	-	-	-	-	-	-	-	-	-	-	-	-	-	-	-	-	-	-	-	-	-	-	-	39.31	9.18	1.1193
	JS-NGO-16s	NGO-HM4	125-250	3	240	90	24	64800	-	-	-	-	-	-	-	-	-	-	-	-	-	-	-	-	-	-	-	-	-	-	yes	-	-	-	-	-	-	-	-	-	-	-	-	-	-	-	39.17	8.72	1.2046
	JS-NGO-16s	NGO-HM4	125-250	4	180	140	40	126000	-	-	-	-	-	-	-	-	-	-	-	-	-	-	-	-	-	-	-	-	-	-	yes	-	-	-	-	-	-	-	-	-	-	-	-	-	-	-	38.91	8.11	0.7628
	JS-NGO-16s	NGO-HM4	125-250	5	190	160	36	136800	-	-	-	-	-	-	-	-	-	-	-	-	-	-	-	-	-	-	-	-	-	-	yes	-	-	-	-	-	-	-	-	-	-	-	-	-	-	-	39.04	8.68	1.1385
	JS-NGO-16s	NGO-HM4	125-250	6	230	170	40	195500	-	-	-	-	-	-	-	-	-	-	-	-	-	-	-	-	-	-	-	-	-	-	yes	-	-	-	-	-	-	-	-	-	-	-	-	-	-	-	39.07	8.21	1.1788
	JS-NGO-16s	NGO-HM4	125-250	7	260	240	40	312000	-	-	-	-	-	-	-	-	-	-	-	-	-	-	-	-	-	-	-	-	-	-	yes	-	-	-	-	-	-	-	-	-	-	-	-	-	-	-	38.91	8.35	1.1447
	JS-NGO-16s	NGO-HM4	125-250	8	220	320	40	352000	-	-	-	-	-	-	-	-	-	-	-	-	-	-	-	-	-	-	-	-	-	-	yes	-	-	-	-	-	-	-	-	-	-	-	-	-	-	-	39.26	9.51	1.2953
	JS-NGO-16s	NGO-HM4	125-250	9	280	380	40	532000	-	-	-	-	-	-	-	-	-	-	-	-	-	-	-	-	-	-	-	-	-	-	yes	-	-	-	-	-	-	-	-	-	-	-	-	-	-	-	38.56	8.01	1.0518
	JS-NGO-16s	NGO-HM4	125-250	10	260	330	40	429000	-	-	-	-	-	-	-	-	-	-	-	-	-	-	-	-	-	-	-	-	-	-	yes	-	-	-	-	-	-	-	-	-	-	-	-	-	-	-	38.87	7.94	1.1404
	JS-NGO-16s	NGO-HM4	125-250	11	180	250	60	337500	yes	-	-	-	-	-	-	-	-	-	-	-	-	-	-	-	-	-	-	-	-	-	-	-	-	-	-	-	-	-	-	-	-	-	-	-	-	-	37.81	4.31	0.9583
	JS-NGO-16s	NGO-HM4	125-250	12	340	250	40	425000	-	-	-	-	yes	-	-	-	-	-	-	-	-	-	-	-	-	-	-	-	-	-	yes	-	-	-	-	-	-	-	-	-	-	-	-	-	-	-	38.29	7.02	0.9606
	JS-NGO-16s	NGO-HM4	125-250	13	180	130	30	87750	-	-	-	-	-	-	-	-	-	-	-	-	-	-	-	-	-	-	-	-	-	-	-	yes	-	-	yes	-	-	-	-	-	-	-	-	-	-	-	38.87	8.31	1.0712
	JS-NGO-16s	NGO-HM4	125-250	14	180	80	18	32400	-	-	-	-	-	-	-	-	-	-	-	-	-	-	-	-	-	-	-	-	-	-	-	-	-	-	-	-	-	yes	-	-	-	-	-	yes	-	-	38.7	4.68	6.38
	JS-NGO-16s	NGO-HM4	125-250	15	170	150	40	127500	-	-	-	-	-	-	-	-	-	-	-	-	-	-	-	-	-	-	-	-	-	-	yes	-	yes	-	-	-	-	-	-	-	-	-	-	-	-	-	38.9	8.86	1.1161
	JS-NGO-16s	NGO-HM4	125-250	16	120	260	40	156000	-	-	-	-	-	-	-	-	-	-	-	-	-	-	-	-	-	-	-	-	-	-	yes	-	-	-	-	-	-	-	-	-	-	-	-	-	-	-	38.94	8.39	1.0293
	JS-NGO-16s	NGO-HM4	125-250	17	160	280	40	224000	-	-	-	yes	-	yes	-	-	-	-	-	yes	-	-	-	-	-	-	-	-	-	-	-	-	-	-	-	-	-	-	-	-	-	-	-	-	-	-	38.19	5.47	3.47
	JS-NGO-16s	NGO-HM4	125-250	18	260	160	40	208000	-	-	-	-	-	-	-	-	-	-	-	-	-	-	-	-	-	-	-	-	-	-	yes	-	-	-	-	-	-	-	-	-	-	-	-	-	-	-	38.55	7.55	1.2827
	JS-NGO-16s	NGO-HM4	125-250	19	240	280	40	336000	-	-	-	-	-	-	-	-	-	-	-	-	-	-	-	-	-	-	-	-	-	-	yes	yes	-	-	-	-	-	-	-	-	-	-	-	-	-	-	38.9	9.26	1.0479
	JS-NGO-16s	NGO-HM4	125-250	20	280	210	40	294000	-	-	-	-	-	-	-	-	-	-	-	-	-	-	-	-	-	-	-	-	-	-	yes	-	-	-	-	-	-	-	-	-	-	-	-	-	-	-	38.92	9.12	1.1111
	JS-NGO-16s	NGO-HM4	125-250	21	240	60	14	25200	-	-	-	-	-	-	-	-	-	-	-	-	-	-	-	-	-	-	-	-	-	-	yes	-	-	-	-	-	-	-	-	-	-	-	-	-	-	-	39.28	9.12	1.2269
	JS-NGO-16s	NGO-HM4	125-250	24	420	130	70	477750	-	-	-	-	-	-	-	-	-	-	-	-	-	-	-	-	-	-	-	-	-	-	-	-	-	-	yes	-	-	-	-	-	-	-	-	-	-	-	38.99	9.07	1.1417
	JS-NGO-16s	NGO-HM4	125-250	25	180	150	40	135000	-	-	-	yes	-	-	-	-	-	-	-	-	-	-	-	-	-	-	-	-	-	-	-	-	-	-	-	-	-	-	-	-	-	-	-	-	-	-	38.81	7.45	1.99
	JS-NGO-16s	NGO-HM4	125-250	26	170	220	40	187000	-	-	-	-	-	-	-	-	-	-	-	-	-	-	-	-	-	-	-	-	-	-	-	-	-	-	-	-	-	-	yes	-	-	-	-	-	-	-	37.86	4.05	5.23
	JS-NGO-16s	NGO-HM4	125-250	27	270	260	40	351000	-	-	-	-	yes	-	-	-	-	-	-	-	-	-	-	-	-	-	-	-	-	-	-	-	-	-	-	-	-	-	-	-	-	-	-	-	-	-	38.58	7.39	1.43
	JS-NGO-16s	NGO-HM4	125-250	28	220	220	40	242000	-	-	-	-	-	yes	-	-	-	-	-	-	-	-	-	-	-	-	-	-	-	-	yes	-	-	-	-	-	-	-	-	-	-	-	-	-	-	-	38.73	8.8	1.1155
	JS-NGO-16s	NGO-HM4	125-250	29	180	270	40	243000	-	-	-	-	yes	-	-	-	-	-	-	-	-	-	-	-	-	-	-	-	-	-	yes	-	-	-	-	-	-	-	-	-	-	-	-	-	-	-	38.85	8.69	1.1942
	JS-NGO-16s	NGO-HM4	125-250	30	140	140	40	98000	-	-	-	-	yes	-	-	-	-	-	-	-	-	-	-	-	-	-	-	-	-	-	yes	-	-	-	-	-	-	-	-	-	-	-	-	-	-	-	39.14	9.28	1.1505
	JS-NGO-16s	NGO-HM4	125-250	31	80	170	40	68000	-	-	-	-	-	-	-	-	-	-	-	-	-	-	-	-	-	-	-	-	-	-	yes	-	-	-	-	-	-	-	-	-	-	-	-	-	-	-	38.85	8.87	1.0122
	JS-NGO-16s	NGO-HM4	125-250	32	300	130	40	195000	-	-	-	-	-	-	-	-	-	-	-	-	-	-	-	-	-	-	-	-	-	-	yes	-	-	-	-	-	-	-	-	-	-	-	-	-	-	-	38.62	7.27	1.3223
	JS-NGO-16s	NGO-HM4	125-250	33	380	230	40	437000	-	-	-	-	-	-	-	-	-	-	-	-	-	-	-	-	-	-	-	-	-	-	-	-	-	-	-	-	-	-	yes	-	-	-	-	-	-	-	38.51	6.2	2.76
	JS-NGO-16s	NGO-HM4	125-250	34	140	130	40	91000	-	-	-	-	-	-	-	-	-	-	-	-	-	-	-	-	-	-	-	-	-	-	yes	-	-	-	-	-	-	-	-	-	-	-	-	-	-	-	38.55	6.5	1.0711
	JS-NGO-16s	NGO-HM4	125-250	35	220	200	40	220000	-	-	-	-	-	-	-	-	-	-	-	-	-	-	-	-	-	-	-	-	-	-	-	-	-	-	-	-	-	-	-	-	-	-	yes	-	-	-	38.56	7.98	1.1067
	JS-NGO-16s	NGO-HM4	125-250	36	190	190	40	180500	-	-	-	-	yes	-	-	-	-	-	-	-	-	-	-	-	-	-	-	-	-	-	-	-	-	-	-	-	-	-	-	-	-	-	-	-	-	-	39.09	9.22	1.42
	JS-NGO-16s	NGO-HM4	125-250	37	15	15	3	84.375	-	-	-	yes	-	-	-	-	-	yes	-	-	-	-	-	-	-	-	-	-	-	-	-	-	-	-	-	-	-	-	-	-	-	-	-	-	-	-	38.89	9.4	1.1665
	JS-NGO-16s	NGO-HM4	125-250	38	190	190	40	180500	-	-	-	-	-	-	-	-	-	-	-	-	-	-	-	-	-	-	-	-	-	-	yes	-	-	-	-	-	-	-	-	-	-	-	-	-	-	-	38.78	8.1	1.1448
	JS-NGO-16s	NGO-HM4	125-250	39	160	290	40	232000	-	-	-	yes	-	-	-	-	-	-	-	-	-	-	-	-	-	-	-	-	-	-	-	-	-	-	-	-	-	-	-	-	-	-	-	-	-	-	38.55	8.11	1.1339
	JS-NGO-16s	NGO-HM4	125-250	40	130	360	40	234000	-	-	-	-	-	-	-	-	-	-	-	-	-	-	-	-	-	-	-	-	-	-	-	-	-	-	yes	-	-	-	-	-	-	-	-	-	-	-	38.63	7.49	1.75
	JS-NGO-16s	NGO-HM4	125-250	41	260	280	40	364000	-	-	-	-	-	-	-	-	-	-	-	-	-	-	-	-	-	-	-	-	-	-	yes	-	-	-	-	-	-	-	-	-	-	-	-	-	-	-	39.37	9.26	1.2246
	JS-NGO-16s	NGO-HM4	125-250	42	280	530	40	742000	yes	-	-	-	-	-	-	-	-	-	-	-	-	-	-	-	-	-	-	-	-	-	-	-	-	-	-	-	-	-	-	-	-	-	-	-	-	-	38.71	7.95	1.1029
	JS-NGO-16s	NGO-HM4	125-250	43	170	120	40	102000	-	-	-	-	-	-	-	-	-	-	-	-	-	-	-	-	-	-	-	-	-	-	yes	-	-	-	yes	-	-	-	-	-	-	-	-	-	-	-	38.61	7.81	0.8274
	JS-NGO-16s	NGO-HM4	125-250	44	130	150	40	97500	-	-	-	-	-	-	-	-	-	-	-	-	-	-	-	-	-	-	-	-	-	-	yes	-	-	-	-	-	-	-	-	-	-	-	-	-	-	-	38.89	9.43	1.1024
	JS-NGO-16s	NGO-HM4	125-250	45	270	380	40	513000	-	-	-	-	-	-	-	-	-	-	-	-	-	-	-	-	-	-	-	-	-	-	yes	-	-	-	yes	-	-	-	-	-	-	-	-	-	-	-	38.64	8.84	1.0992
	JS-NGO-16s	NGO-HM4	125-250	46	260	150	40	195000	-	-	-	yes	-	-	-	-	-	-	-	-	-	-	-	-	-	-	-	-	-	-	yes	-	-	-	-	-	-	-	-	-	-	-	-	-	-	-	39.01	8.65	1.1226
	JS-NGO-16s	NGO-HM4	125-250	47	170	200	40	170000	-	-	-	-	-	-	-	-	-	-	-	-	-	-	-	-	-	-	-	-	-	-	yes	-	-	-	-	-	-	-	-	-	-	-	-	-	-	-	39.14	8.49	1.1978
	JS-NGO-16s	NGO-HM4	125-250	48	110	250	40	137500	-	-	-	-	-	-	-	-	-	-	-	-	-	-	-	-	-	-	-	-	-	-	yes	-	-	-	-	-	-	-	-	-	-	-	-	-	-	-	39.16	8.7	1.0473
	JS-NGO-16s	NGO-HM4	125-250	49	130	140	40	91000	-	-	-	-	-	-	-	-	-	-	-	-	-	-	-	-	-	-	-	-	-	-	yes	-	-	-	-	-	-	-	-	-	-	-	-	-	-	-	38.73	8	1.2402
	JS-NGO-16s	NGO-HM4	125-250	50	220	110	40	121000	-	-	-	-	-	-	-	-	-	-	-	-	-	-	-	-	-	-	-	-	-	-	yes	-	-	-	-	-	-	-	-	-	-	-	-	-	-	-	38.81	8.77	1.0778
	JS-NGO-16s	NGO-HM4	125-250	51	150	130	40	97500	-	-	-	-	-	-	-	-	-	-	-	-	-	-	-	-	-	-	-	-	-	-	-	-	-	-	-	-	-	-	-	-	-	-	yes	-	-	-	38.97	9.22	1.216
	JS-NGO-16s	NGO-HM4	125-250	52	340	330	40	561000	-	-	-	-	-	-	-	-	-	-	-	-	-	-	-	-	-	-	-	-	-	-	yes	-	-	-	-	-	-	-	-	-	-	-	-	-	-	-	38.95	7.7	1.1429
	JS-NGO-16s	NGO-HM4	125-250	53	100	190	40	95000	yes	-	-	-	-	-	-	-	-	-	-	-	-	-	-	-	-	-	-	-	-	-	-	-	-	-	-	-	-	-	-	-	-	-	-	-	-	-	38.63	9.21	1.2649
	JS-NGO-16s	NGO-HM4	125-250	54	140	270	40	189000	-	-	-	-	-	-	-	-	-	-	-	-	-	-	-	-	-	-	-	-	-	-	yes	-	-	-	-	-	-	-	-	-	-	-	-	-	-	-	38.99	9.17	0.8713
	JS-NGO-16s	NGO-HM4	125-250	55	270	300	40	405000	-	-	-	-	-	-	-	-	-	-	-	-	-	-	-	-	-	-	-	-	-	-	yes	-	-	-	yes	-	-	-	-	-	-	-	-	-	-	-	38.62	9.38	1.3231
	JS-NGO-16s	NGO-HM4	125-250	56	160	280	40	224000	-	-	-	-	-	-	-	-	-	-	-	-	-	-	-	-	-	-	-	-	-	-	-	-	-	-	yes	-	-	-	-	-	-	-	-	-	-	-	38.76	8.64	1.1613
	JS-NGO-16s	NGO-HM4	125-250	57	200	210	40	210000	-	-	-	-	-	-	-	-	-	-	-	-	-	-	-	-	-	-	-	-	-	-	yes	-	-	-	-	-	-	-	-	-	-	-	-	-	-	-	38.68	8.74	1.56
	JS-NGO-16s	NGO-HM4	125-250	58	240	180	40	216000	yes	-	-	-	-	-	-	-	-	-	-	-	-	-	-	-	-	-	-	-	-	-	-	-	-	-	-	-	-	-	-	-	-	-	-	-	-	-	38.73	5.86	2.95
	JS-NGO-16s	NGO-HM4	125-250	59	280	140	40	196000	-	-	-	-	yes	-	-	-	-	-	-	-	-	-	-	-	-	-	-	-	-	-	yes	-	-	-	-	-	-	-	-	-	-	-	-	-	-	-	38.46	8.64	1.0814
	JS-NGO-16s	NGO-HM4	125-250	60	210	70	40	73500	-	-	-	-	-	-	-	-	-	-	-	-	-	-	-	-	-	-	-	-	-	-	-	-	-	-	-	-	-	yes	-	yes	-	-	-	-	-	-	38.27	5.84	6.13
	JS-NGO-16s	NGO-HM4	125-250	61	180	230	40	207000	-	-	-	-	-	-	-	-	-	-	-	-	-	-	-	-	-	-	-	-	-	-	yes	-	-	-	-	-	-	-	-	-	-	-	-	-	-	-	38.3	7.63	0.9403
	JS-NGO-16s	NGO-HM4	125-250	62	130	110	40	71500	-	-	-	-	-	-	-	-	-	-	-	-	-	-	-	-	-	-	-	-	-	-	-	-	-	-	-	-	-	-	-	-	-	-	yes	-	-	-	38.47	8.92	1.1651
	JS-NGO-16s	NGO-HM4	125-250	63	80	120	40	48000	-	-	-	-	-	-	-	-	-	-	-	-	-	-	-	-	-	-	-	-	-	-	yes	-	-	-	-	-	-	-	-	-	-	-	-	-	-	-	38.13	7.87	1.1005
	JS-NGO-16s	NGO-HM4	125-250	64	180	300	40	270000	-	-	-	-	-	-	-	-	-	-	-	-	-	-	-	-	-	-	-	-	-	-	yes	-	-	-	-	-	-	-	-	-	-	-	-	-	-	-	38.18	7.99	1.1098
	JS-NGO-16s	NGO-HM4	125-250	65	310	110	40	170500	-	-	-	-	-	-	-	-	-	-	-	-	-	-	-	-	-	-	-	-	-	-	yes	-	-	-	-	-	-	-	-	-	-	-	-	-	-	-	38.62	9.22	1.1636
	JS-NGO-16s	NGO-HM4	125-250	66	210	160	40	168000	yes	-	-	-	-	-	-	-	-	-	-	-	-	-	-	-	-	-	-	-	-	-	-	-	-	-	-	-	-	-	-	-	-	-	-	-	-	-	38.76	8.69	1.2802
	JS-NGO-16s	NGO-HM4	125-250	67	110	250	40	137500	-	-	-	-	-	-	-	-	-	-	-	yes	-	-	-	-	-	-	-	-	-	-	-	yes	-	-	-	-	-	-	-	-	-	-	-	-	-	-	38.41	7.36	1.296
	JS-NGO-16s	NGO-HM4	125-250	68	170	170	40	144500	-	-	-	-	-	-	-	-	-	-	-	-	-	-	-	-	-	-	-	-	-	-	-	-	-	-	yes	-	-	yes	-	-	-	-	yes	-	-	-	38.17	5.5	4.6
	JS-NGO-16s	NGO-HM4	125-250	69	160	100	40	80000	-	-	-	-	-	yes	-	-	-	-	-	-	-	-	-	-	-	-	-	-	-	-	-	-	-	-	yes	-	-	-	-	-	-	-	-	-	-	-	38.84	9.29	1.43
	JS-NGO-16s	NGO-HM4	125-250	70	190	120	40	114000	-	-	-	yes	-	-	-	-	-	-	-	-	-	-	-	-	-	-	-	-	-	-	-	-	-	-	-	-	-	-	-	-	-	-	-	-	-	-	38.92	9.24	1.3837
	JS-NGO-16s	NGO-HM4	125-250	71	350	200	40	350000	-	-	-	-	-	-	-	-	-	-	-	-	-	-	-	-	-	-	-	-	-	-	yes	-	-	-	yes	-	-	-	-	-	-	-	-	-	-	-	38.67	9.12	1.1142
	JS-NGO-16s	NGO-HM4	125-250	72	120	270	40	162000	-	-	-	-	-	-	-	-	-	-	-	-	-	-	-	-	-	-	-	-	-	-	yes	-	-	-	-	-	-	-	-	-	-	-	-	-	-	-	38.9	9.24	1.2311
	JS-NGO-16s	NGO-HM4	125-250	73	200	100	40	100000	-	-	-	-	-	-	-	-	-	-	-	-	-	-	-	-	-	-	-	-	-	-	yes	-	-	-	-	-	-	-	-	-	-	-	-	-	-	-	38.67	9.38	1.1299
	JS-NGO-16s	NGO-HM4	125-250	74	140	230	40	161000	yes	-	-	-	-	-	-	-	-	-	-	-	-	-	-	-	-	-	-	-	-	-	yes	-	-	-	-	-	-	-	-	-	-	-	-	-	-	-	38.72	10.32	1.2569
	JS-NGO-16s	NGO-HM4	125-250	75	130	170	40	110500	-	-	-	yes	-	-	-	-	-	-	-	-	-	-	-	-	-	-	-	-	-	-	yes	-	-	-	-	-	-	-	-	-	-	-	-	-	-	-	38.57	7.53	1.2709
	JS-NGO-16s	NGO-HM4	125-250	76	150	190	40	142500	-	-	-	-	-	-	-	-	-	-	-	-	-	-	-	-	-	-	-	-	-	-	yes	yes	-	-	-	-	-	-	-	-	-	-	-	-	-	-	38.84	9.23	1.1739
	JS-NGO-16s	NGO-HM4	125-250	77	250	320	40	400000	-	-	-	-	-	-	-	-	-	-	-	-	-	-	-	-	-	-	-	-	-	-	yes	-	-	-	-	-	-	-	-	-	-	-	-	-	-	-	38.44	8.43	0.9148
	JS-NGO-16s	NGO-HM4	125-250	78	170	100	40	85000	-	-	-	-	-	-	-	-	-	-	-	-	-	-	-	-	-	-	-	-	-	-	yes	-	-	-	yes	-	-	-	-	-	-	-	-	-	-	-	38.74	10.23	1.0691
	JS-NGO-16s	NGO-HM4	125-250	79	180	160	40	144000	-	-	-	-	-	-	-	-	-	-	-	-	-	-	-	-	-	-	-	-	-	-	yes	-	-	-	yes	-	-	-	-	-	-	-	-	-	-	-	38.54	7.71	1.1252
	JS-NGO-16s	NGO-HM4	125-250	80	200	230	40	230000	-	-	-	-	-	-	-	-	-	-	-	-	-	-	-	-	-	-	-	-	-	-	yes	-	-	-	-	-	-	-	-	-	-	-	-	-	-	-	38.79	8.73	1.2565
	JS-NGO-16s	NGO-HM4	125-250	81	310	200	40	310000	-	-	-	-	-	-	-	-	-	-	-	-	-	-	-	-	-	-	-	-	-	-	yes	-	-	-	-	-	-	-	-	-	-	-	-	-	-	-	38.72	9.21	1.1293
	JS-NGO-16s	NGO-HM4	125-250	82	110	150	40	82500	-	-	-	-	yes	-	-	-	-	-	-	-	-	-	-	-	-	-	-	-	-	-	-	-	-	-	-	-	-	-	-	-	-	-	-	-	-	-	38.54	8.72	1.0185
	JS-NGO-16s	NGO-HM4	125-250	83	110	130	40	71500	-	-	-	yes	-	-	-	-	-	-	-	-	-	-	-	-	-	-	-	-	-	-	-	-	-	-	-	-	-	-	-	-	-	-	-	-	-	-	37.96	6.1	2.4
	JS-NGO-16s	NGO-HM4	125-250	84	280	280	40	392000	-	-	-	-	-	-	-	-	-	-	-	-	-	-	-	-	-	-	-	-	-	-	-	-	-	-	yes	-	-	-	-	-	-	-	-	-	-	-	38.92	9.42	1.3286
	JS-NGO-16s	NGO-HM4	125-250	85	200	200	40	200000	-	-	-	-	-	-	-	-	-	-	-	-	-	-	-	-	-	-	-	-	-	-	yes	-	-	-	-	-	-	yes	-	-	-	-	-	-	-	-	37.89	5.26	3.15
	JS-NGO-16s	NGO-HM4	125-250	86	140	140	40	98000	-	-	-	yes	-	-	-	-	-	-	-	-	-	-	-	-	-	-	-	-	-	-	yes	-	-	-	-	-	-	-	-	-	-	-	-	-	-	-	38.63	9.18	1.1551
	JS-NGO-16s	NGO-HM4	125-250	87	120	110	40	66000	-	-	-	-	-	-	-	-	-	-	-	-	-	-	-	-	-	-	-	-	-	-	yes	-	-	-	-	-	-	-	-	-	-	-	-	-	-	-	38.31	8.35	1.0287
	JS-NGO-16s	NGO-HM4	125-250	88	110	220	40	121000	yes	-	-	-	-	-	-	-	-	-	-	-	-	-	-	-	-	-	-	-	-	-	-	-	-	-	-	-	-	-	-	-	-	-	-	-	-	-	37.71	1.73	10.83
	JS-NGO-16s	NGO-HM4	125-250	89	130	330	40	214500	-	-	-	-	-	-	-	-	-	-	-	-	-	-	-	-	-	-	-	-	-	-	yes	-	-	-	-	-	-	-	-	-	-	-	-	-	-	-	38.25	8.52	1.177
	JS-NGO-16s	NGO-HM4	125-250	90	230	230	40	264500	-	-	-	yes	-	-	-	-	-	-	-	-	-	-	-	-	-	-	-	-	-	-	yes	-	-	-	-	-	-	-	-	-	-	-	yes	-	-	-	39	7.6	1.68
	JS-NGO-16s	NGO-HM4	125-250	91	130	150	40	97500	yes	-	-	-	-	-	-	-	-	-	-	yes	-	-	-	-	-	-	-	-	-	-	yes	-	-	-	yes	-	-	-	-	-	-	-	-	-	-	-	38.83	8.63	1.1011
	JS-NGO-16s	NGO-HM4	125-250	92	180	160	40	144000	-	-	-	yes	-	-	-	-	-	-	-	-	-	-	-	-	-	-	-	-	-	-	-	-	-	-	-	-	-	-	-	-	-	-	-	-	-	-	38.82	8.82	3.51
	JS-NGO-16s	NGO-HM4	125-250	93	160	130	40	104000	yes	-	-	-	-	-	-	-	-	-	-	-	-	-	-	-	-	-	-	-	-	-	-	-	-	-	-	-	-	yes	-	-	-	-	-	-	-	-	38.38	8.26	1.54
	JS-NGO-16s	NGO-HM4	125-250	94	120	330	40	198000	yes	-	-	-	-	-	-	-	-	-	-	-	-	-	-	-	-	-	-	-	-	-	-	-	-	-	-	-	-	yes	-	-	-	-	-	-	-	-	38.07	4.29	6.24
	JS-NGO-16s	NGO-HM4	125-250	95	140	140	40	98000	-	-	-	-	-	-	-	-	-	-	-	-	-	-	-	-	-	-	-	-	-	-	yes	-	-	-	-	-	-	-	-	-	-	-	-	-	-	-	38.67	9.43	1.43
	JS-NGO-16s	NGO-HM4	125-250	96	120	210	40	126000	yes	-	-	-	-	-	-	-	-	-	-	-	-	-	-	-	-	-	-	-	-	-	-	-	-	-	-	-	-	-	-	-	-	-	-	-	-	-	38.01	6.81	0.9032
	JS-NGO-16s	NGO-HM4	125-250	98	300	120	40	180000	yes	-	-	-	-	-	-	-	-	-	-	-	-	-	-	-	-	-	-	-	-	-	-	-	-	-	-	-	-	yes	-	-	-	-	-	-	-	-	38.27	4.89	6.8
	JS-NGO-16s	NGO-HM4	125-250	99	150	250	40	187500	-	-	-	-	-	-	-	-	-	-	-	-	-	-	-	-	-	-	-	-	-	-	-	-	-	-	-	-	-	-	-	-	-	-	-	yes	-	-	38.52	7.76	0.9705
	JS-NGO-16s	NGO-HM4	125-250	100	220	460	40	506000	-	-	-	-	-	-	-	-	-	-	-	-	-	-	-	-	-	-	-	-	-	-	-	-	-	-	-	-	-	yes	-	-	-	-	yes	-	-	-	37.71	3.14	8.08
	JS-NGO-16s	NGO-HM4	125-250	101	120	200	40	120000	-	-	-	-	-	yes	-	-	-	-	-	-	-	-	-	-	-	-	-	-	-	-	yes	-	-	-	-	-	-	-	-	-	-	-	-	-	-	-	38.75	9.67	1.2565
	JS-NGO-16s	NGO-HM4	125-250	102	320	110	40	176000	-	-	-	-	-	-	-	-	-	-	-	-	-	-	-	-	-	-	-	-	-	-	yes	-	-	-	-	-	-	-	-	-	-	-	-	-	-	-	38.64	9.13	1.1068
	JS-NGO-16s	NGO-HM4	125-250	103	300	220	40	330000	-	-	-	-	-	-	-	-	-	-	-	-	-	-	-	-	-	-	-	-	-	-	yes	-	-	-	-	-	-	-	-	-	-	-	-	-	-	-	38.17	7	1.0956
	JS-NGO-16s	JS-NGO-16s_250-500_1st	250-500	1	450	590	40	1327500	yes	-	-	-	-	-	-	-	-	-	-	-	-	-	-	-	-	-	-	-	-	-	yes	-	-	-	-	-	-	-	-	-	-	-	-	-	-	-	38.95	9.32	1.1969
	JS-NGO-16s	JS-NGO-16s_250-500_1st	250-500	2	230	400	40	460000	-	-	-	-	-	-	-	-	-	-	-	-	-	-	-	-	-	-	-	-	-	-	yes	-	-	-	-	-	-	-	-	-	-	-	-	-	-	-	38.83	8.83	1.0895
	JS-NGO-16s	JS-NGO-16s_250-500_1st	250-500	3	280	540	40	756000	yes	-	-	-	-	-	-	-	-	-	-	-	-	-	-	-	-	-	-	-	-	-	yes	-	-	-	yes	-	-	-	-	-	-	-	-	-	-	-	38.57	7.91	1.2072
	JS-NGO-16s	JS-NGO-16s_250-500_1st	250-500	4	610	310	40	945500	yes	-	-	yes	-	yes	-	-	-	-	-	-	-	yes	-	-	-	-	-	-	-	-	-	-	-	-	-	-	-	-	yes	-	-	-	-	-	-	phlogopite-biotite + apatite	38.92	9.72	1.188
	JS-NGO-16s	JS-NGO-16s_250-500_1st	250-500	5	300	400	40	600000	-	-	-	-	-	-	-	-	-	-	-	-	-	-	-	-	-	-	-	-	-	-	yes	-	-	-	-	-	-	-	-	-	-	-	-	-	-	-	38.78	8.02	1.2683
	JS-NGO-16s	JS-NGO-16s_250-500_1st	250-500	6	400	500	40	1000000	yes	-	-	-	-	-	-	-	-	-	-	-	-	-	-	-	-	-	-	-	-	-	-	-	-	-	-	-	-	-	-	-	-	-	-	-	-	-	38.94	7.12	3.01
	JS-NGO-16s	JS-NGO-16s_250-500_1st	250-500	7	210	210	50	275625	-	-	-	-	-	-	-	-	-	-	-	-	-	-	-	-	-	-	-	-	-	-	yes	-	-	-	-	-	-	-	-	-	-	-	-	-	-	-	38.79	7.44	1.1319
	JS-NGO-16s	JS-NGO-16s_250-500_1st	250-500	8	420	360	40	756000	-	-	-	yes	-	-	-	-	-	-	-	-	-	-	-	-	-	-	-	-	-	-	-	-	-	-	-	-	-	-	-	-	-	-	-	-	-	-	38.93	9.28	1.1219
	JS-NGO-16s	JS-NGO-16s_250-500_1st	250-500	9	560	250	40	700000	yes	-	-	yes	-	-	-	-	-	-	-	-	-	-	-	-	-	-	-	-	-	-	yes	-	-	-	-	-	-	-	-	-	-	-	-	-	-	-	39.06	9.17	1.1524
	JS-NGO-16s	JS-NGO-16s_250-500_1st	250-500	10	400	450	40	900000	yes	-	-	-	-	-	-	-	-	-	-	-	-	-	-	-	-	-	-	-	-	-	-	-	-	-	-	-	-	-	-	-	-	-	-	-	-	-	38.02	4.26	2.67
	JS-NGO-16s	JS-NGO-16s_250-500_1st	250-500	11	430	640	40	1376000	-	-	-	-	-	-	-	-	-	-	-	yes	-	-	-	-	-	-	-	-	-	-	-	yes	-	-	-	-	-	-	-	-	-	-	-	-	-	-	38.47	8.46	1.045
	JS-NGO-16s	JS-NGO-16s_250-500_1st	250-500	12	280	400	40	560000	-	-	-	-	-	-	-	-	-	-	-	-	-	-	-	-	-	-	-	-	-	-	-	-	-	-	-	-	-	-	-	-	-	-	yes	-	-	-	38.43	7.19	1.1443
	JS-NGO-16s	JS-NGO-16s_250-500_1st	250-500	13	190	270	40	256500	-	-	-	-	-	-	-	-	-	-	-	-	-	-	-	-	-	-	-	-	-	-	yes	-	-	-	-	-	-	-	-	-	-	-	-	-	-	-	38.88	8.41	1.2665
	JS-NGO-16s	JS-NGO-16s_250-500_1st	250-500	14	300	640	40	960000	-	-	-	-	-	yes	-	-	-	-	-	-	-	-	-	-	-	-	-	-	-	-	yes	-	-	-	yes	-	-	-	-	-	-	-	-	-	-	-	38.74	8.23	1.126
	JS-NGO-16s	JS-NGO-16s_250-500_1st	250-500	15	480	390	40	936000	yes	-	-	-	-	-	-	-	-	-	-	-	-	-	-	-	-	-	yes	-	-	-	-	-	-	-	-	-	-	-	-	-	-	-	-	-	-	-	38.99	9.35	1.1519
	JS-NGO-16s	JS-NGO-16s_250-500_1st	250-500	16	240	700	40	840000	-	-	-	-	-	-	-	-	-	-	-	-	-	-	-	-	-	-	-	-	-	-	-	-	-	-	-	-	-	yes	-	-	-	-	-	-	yes	carbonate + CO2	38.88	8.82	1.3333
	JS-NGO-16s	JS-NGO-16s_250-500_1st	250-500	17	440	270	40	594000	-	-	-	-	-	-	-	-	-	-	-	yes	-	-	-	-	-	-	-	-	-	-	-	-	-	-	-	-	-	-	-	-	-	-	-	-	-	-	39.33	9.41	1.3429
	JS-NGO-16s	JS-NGO-16s_250-500_1st	250-500	18	300	470	40	705000	yes	-	-	yes	-	-	-	-	-	-	-	-	-	-	-	-	-	-	-	-	-	-	-	-	-	-	-	-	-	-	-	-	-	-	-	-	-	-	39.05	10.02	1.2543
	JS-NGO-16s	JS-NGO-16s_250-500_1st	250-500	19	530	650	40	1722500	-	-	-	yes	-	-	-	-	-	-	-	yes	-	-	-	-	-	-	-	-	-	-	yes	-	-	-	yes	-	-	-	-	-	-	-	-	-	-	-	39.08	9.82	1.1225
	JS-NGO-16s	JS-NGO-16s_250-500_1st	250-500	20	590	300	40	885000	yes	-	-	-	-	-	-	-	-	-	-	-	-	-	-	-	-	-	-	-	-	-	-	-	-	-	-	-	-	-	-	-	-	-	-	-	-	-	38.26	7.45	1.1582
	JS-NGO-16s	JS-NGO-16s_250-500_1st	250-500	21	220	260	40	286000	-	-	-	-	-	-	-	-	-	-	-	-	-	-	-	-	-	-	-	-	-	-	yes	-	-	-	-	-	-	-	-	-	-	-	-	yes	-	-	38.65	8.36	1.1816
	JS-NGO-16s	JS-NGO-16s_250-500_1st	250-500	22	250	340	40	425000	-	-	-	-	-	-	-	-	-	-	-	yes	-	-	-	-	-	-	-	-	-	-	yes	-	-	-	-	-	-	-	-	-	-	-	-	-	-	-	38.67	8.73	1.2551
	JS-NGO-16s	JS-NGO-16s_250-500_1st	250-500	23	270	280	40	378000	yes	-	-	-	-	-	-	-	-	-	-	-	-	-	-	-	-	-	-	-	-	-	-	-	-	-	-	-	-	-	-	-	-	-	-	-	-	-	39.04	7.46	3.47
	JS-NGO-16s	JS-NGO-16s_250-500_1st	250-500	24	590	310	40	914500	-	yes	yes	-	-	-	-	-	-	-	-	yes	-	yes	-	-	-	-	-	-	-	-	-	-	-	-	-	-	-	-	-	-	-	-	-	yes	-	cristobalite + tridymite + phlogopite-biotite + unknown	38.79	8.56	1.0328
	JS-NGO-16s	JS-NGO-16s_250-500_1st	250-500	25	420	150	40	315000	-	-	-	-	-	-	-	-	-	-	-	-	-	-	-	-	-	-	-	-	-	-	yes	-	-	-	yes	-	-	-	-	-	-	-	-	-	-	-	38.46	8.07	1.069
	JS-NGO-16s	JS-NGO-16s_250-500_1st	250-500	26	340	360	40	612000	-	-	-	-	-	-	-	-	-	-	-	-	-	-	-	-	-	-	-	-	-	-	yes	-	-	-	-	-	-	-	-	-	-	-	-	-	-	-	38.66	7.91	1.1097
	JS-NGO-16s	JS-NGO-16s_250-500_1st	250-500	27	580	540	40	1566000	yes	-	-	yes	-	-	-	-	-	-	-	-	-	-	-	-	-	-	-	-	-	-	-	-	-	-	yes	-	-	yes	yes	-	-	-	-	-	-	-	38.44	5.27	6.11
	JS-NGO-16s	JS-NGO-16s_250-500_1st	250-500	28	450	260	40	585000	-	-	-	yes	-	-	-	-	-	-	-	-	-	-	-	-	-	-	-	-	-	-	yes	-	-	-	yes	-	-	-	-	-	-	-	-	-	-	-	38.56	8.53	0.7792
	JS-NGO-16s	JS-NGO-16s_250-500_1st	250-500	29	300	330	40	495000	-	-	-	-	-	-	-	-	-	-	-	-	-	-	-	-	-	-	-	-	-	-	yes	-	-	-	-	-	-	-	-	-	-	-	-	-	-	-	38.92	9.38	1.1031
	JS-NGO-16s	JS-NGO-16s_250-500_1st	250-500	30	270	370	40	499500	-	-	-	-	-	-	-	-	-	-	-	-	-	-	-	-	-	-	-	-	-	-	yes	-	-	-	-	-	-	-	-	-	-	-	-	-	-	-	38.72	8.69	1.109
	JS-NGO-16s	JS-NGO-16s_250-500_1st	250-500	31	560	590	40	1652000	-	-	-	yes	-	-	-	-	-	-	-	yes	-	-	-	-	-	-	-	-	-	-	-	-	-	-	-	-	-	-	-	-	-	-	-	-	-	-	38.26	5.29	4.58
	JS-NGO-16s	JS-NGO-16s_250-500_1st	250-500	32	570	380	40	1083000	yes	-	-	yes	-	-	-	-	-	-	-	-	-	-	-	-	-	-	-	-	-	-	-	-	-	-	-	-	-	-	-	-	-	-	-	-	-	-	38.93	9.22	1.0944
	JS-NGO-16s	JS-NGO-16s_250-500_1st	250-500	33	430	350	40	752500	-	-	-	-	-	-	-	-	-	-	-	yes	-	-	-	-	-	-	-	-	-	-	yes	-	-	-	-	-	-	yes	-	-	-	-	-	-	-	-	38.92	8.71	1.2497
	JS-NGO-16s	JS-NGO-16s_250-500_1st	250-500	34	0	0	0	0	-	-	-	-	-	-	-	-	-	-	-	-	-	-	-	-	-	-	-	-	-	-	yes	-	-	-	-	-	-	-	-	-	-	-	-	-	-	-	38.8	9.45	1.2928
	JS-NGO-16s	JS-NGO-16s_250-500_1st	250-500	35	210	320	40	336000	-	-	-	-	-	-	-	-	-	-	-	-	-	-	-	-	-	-	-	-	-	-	-	-	-	-	-	-	-	-	-	-	-	-	yes	-	-	opaque + CO2	38.36	7.17	1.74
	JS-NGO-16s	JS-NGO-16s_250-500_1st	250-500	36	210	460	40	483000	-	-	-	-	-	-	-	-	-	-	-	-	-	-	-	-	-	-	-	-	-	-	yes	-	-	-	-	-	-	-	-	-	-	-	-	-	-	-	38.8	7.35	1.0893
	JS-NGO-16s	JS-NGO-16s_250-500_1st	250-500	37	320	420	40	672000	-	-	-	-	-	-	-	-	-	-	-	-	-	-	-	-	-	-	-	-	-	-	-	-	-	-	yes	-	-	-	-	-	-	-	-	-	-	-	38.52	6.14	5.01
	JS-NGO-16s	JS-NGO-16s_250-500_1st	250-500	38	210	500	40	525000	yes	-	-	-	yes	-	-	-	-	-	-	-	-	-	-	-	-	-	-	-	-	-	-	-	-	-	-	-	-	-	-	-	-	-	-	-	-	-	39	9.08	1.0676
	JS-NGO-16s	JS-NGO-16s_250-500_1st	250-500	39	450	300	40	675000	-	-	-	-	-	-	-	-	-	-	-	-	-	-	-	-	-	-	-	-	-	-	yes	-	-	-	yes	-	-	-	-	-	-	-	-	-	-	-	38.95	8.53	1.2502
	JS-NGO-16s	JS-NGO-16s_250-500_1st	250-500	40	320	350	40	560000	yes	-	-	-	-	-	-	-	-	-	-	-	-	-	-	-	-	-	-	-	-	-	yes	-	-	-	-	-	-	-	yes	-	-	-	-	-	-	-	38.73	7.86	2.07
	JS-NGO-16s	JS-NGO-16s_250-500_1st	250-500	41	470	280	40	658000	-	-	-	-	-	-	-	-	-	-	-	-	-	-	-	-	-	-	-	-	-	-	-	-	-	-	yes	yes	-	-	-	-	-	-	-	-	-	-	39.1	9.42	1.2222
	JS-NGO-16s	JS-NGO-16s_250-500_1st	250-500	42	540	460	40	1242000	yes	-	-	-	-	-	-	-	-	-	-	-	-	yes	-	-	-	-	-	-	-	-	yes	-	-	-	-	-	-	-	-	-	-	-	-	-	-	-	38.39	8.28	1.092
	JS-NGO-16s	JS-NGO-16s_250-500_1st	250-500	43	100	130	10	16250	-	-	-	-	-	-	-	-	-	-	-	-	-	-	-	-	-	-	-	-	-	-	yes	yes	-	-	-	-	-	-	-	-	-	-	-	-	-	-	38.17	6.47	0.7688
	JS-NGO-16s	JS-NGO-16s_250-500_1st	250-500	44	240	620	40	744000	-	-	-	-	-	-	-	-	-	-	-	-	-	-	-	-	-	-	-	-	-	-	yes	-	-	-	-	-	-	-	-	-	-	-	-	-	-	-	38.84	9.4	1.077
	JS-NGO-16s	JS-NGO-16s_250-500_1st	250-500	45	280	340	40	476000	-	-	-	-	-	-	-	-	-	-	-	-	-	-	-	-	-	-	-	-	-	-	yes	-	-	-	-	-	-	-	-	-	-	-	-	-	-	-	38.94	8.27	1.0663
	JS-NGO-16s	JS-NGO-16s_250-500_1st	250-500	46	230	420	40	483000	yes	-	-	-	-	-	-	-	-	-	-	-	-	-	-	-	-	-	-	-	-	-	yes	-	-	-	-	-	-	-	-	-	-	-	-	-	-	-	39.08	9.15	1.2162
	JS-NGO-16s	JS-NGO-16s_250-500_1st	250-500	47	470	310	40	728500	yes	-	-	-	-	-	-	-	-	-	-	-	-	-	-	-	-	-	-	-	-	-	-	-	-	-	-	yes	-	-	yes	-	-	-	-	-	-	-	39.21	9.93	1.3258
	JS-NGO-16s	JS-NGO-16s_250-500_1st	250-500	48	400	410	40	820000	yes	-	-	-	-	yes	-	-	-	-	-	-	-	-	-	-	-	-	-	-	-	-	-	-	-	-	-	-	-	-	-	-	-	-	-	-	-	-	39.08	8.33	1.3931
	JS-NGO-16s	JS-NGO-16s_250-500_1st	250-500	49	750	700	20	1312500	-	-	-	-	-	-	-	-	-	-	-	-	-	-	-	-	-	-	-	-	-	-	yes	-	-	-	-	-	-	-	-	-	-	-	-	-	-	-	38.68	9.14	1.131
	JS-NGO-16s	JS-NGO-16s_250-500_1st	250-500	50	480	300	40	720000	-	-	-	-	-	-	-	-	-	-	-	-	-	-	-	-	-	-	-	-	-	-	yes	-	-	-	-	-	-	-	-	-	-	-	-	-	-	-	38.72	8.58	1.1338
	JS-NGO-16s	JS-NGO-16s_250-500_1st	250-500	51	470	190	40	446500	-	-	-	-	-	-	-	-	-	-	-	-	-	-	-	-	-	-	-	-	-	-	yes	-	-	-	-	-	-	-	-	-	-	-	-	-	-	-	39.11	9.95	1.3282
	JS-NGO-16s	JS-NGO-16s_250-500_1st	250-500	52	440	430	40	946000	yes	-	-	yes	-	-	-	-	-	-	-	-	-	-	-	-	-	-	-	-	-	-	yes	-	-	-	-	-	-	-	-	-	-	-	-	-	-	-	38.71	8.98	0.8117
	JS-NGO-16s	JS-NGO-16s_250-500_1st	250-500	53	350	500	40	875000	yes	-	-	yes	yes	-	-	-	-	yes	-	yes	-	-	-	-	-	-	-	-	-	-	-	-	-	-	-	-	-	-	-	-	-	-	-	yes	-	quartz + kokchetavite + H2O + unknown	38.82	8.85	1.0949
	JS-NGO-16s	JS-NGO-16s_250-500_1st	250-500	54	430	570	40	1225500	-	-	-	-	-	-	-	-	-	-	-	-	-	-	-	-	-	-	-	-	-	-	yes	-	-	-	-	-	-	-	-	-	-	-	-	-	-	-	38.42	8.23	0.8136
	JS-NGO-16s	JS-NGO-16s_250-500_1st	250-500	55	300	350	40	525000	-	-	-	-	-	-	-	-	-	-	-	yes	-	-	-	-	-	-	-	-	-	-	-	-	-	-	-	-	-	yes	-	-	-	-	-	-	-	graphite + carbonate	38.72	8.49	1.0333
	JS-NGO-16s	JS-NGO-16s_250-500_1st	250-500	56	590	460	40	1357000	-	-	-	-	-	-	-	-	-	-	-	-	-	-	-	-	-	-	-	-	-	-	yes	-	-	-	-	-	-	-	-	-	-	-	-	-	-	-	38.62	9.32	1.1872
	JS-NGO-16s	JS-NGO-16s_250-500_1st	250-500	57	510	420	40	1071000	-	-	-	-	-	-	-	-	-	-	-	-	-	-	-	-	-	-	-	-	-	-	yes	-	-	-	-	-	-	-	-	-	-	-	-	-	-	-	38.71	8.79	1.0864
	JS-NGO-16s	JS-NGO-16s_250-500_1st	250-500	58	510	350	40	892500	-	-	-	yes	-	-	-	-	-	-	-	-	-	-	-	-	-	-	-	-	-	-	yes	-	-	-	-	-	-	-	-	-	-	-	-	-	-	-	38.66	9.03	1.0851
	JS-NGO-16s	JS-NGO-16s_250-500_1st	250-500	59	190	580	40	551000	-	-	-	yes	-	-	-	-	-	-	-	-	-	-	-	-	-	-	-	-	-	-	-	-	-	-	-	-	-	-	yes	-	-	-	-	-	-	-	38.75	7.97	1.1414
	JS-NGO-16s	JS-NGO-16s_250-500_1st	250-500	60	330	240	40	396000	yes	-	-	-	yes	-	-	-	-	-	-	-	-	-	-	-	-	-	-	-	-	-	-	-	-	-	-	yes	-	-	-	-	-	-	-	-	-	-	38.83	8.24	1.3675
	JS-NGO-16s	JS-NGO-16s_250-500_1st	250-500	61	370	440	40	814000	-	-	-	-	-	-	-	-	-	-	-	yes	-	-	-	-	-	-	-	-	-	-	yes	-	-	-	-	-	-	-	-	-	-	-	-	-	-	-	38.54	7.79	1.0648
	JS-NGO-16s	JS-NGO-16s_250-500_1st	250-500	62	320	330	40	528000	-	-	-	yes	-	-	-	-	-	-	-	-	-	-	-	-	-	-	-	-	-	-	yes	-	-	-	-	-	-	-	yes	-	-	-	-	-	-	-	38.88	9.47	1.117
	JS-NGO-16s	JS-NGO-16s_250-500_1st	250-500	63	390	300	40	585000	-	-	-	-	-	-	-	-	-	-	-	-	-	-	-	-	-	-	-	-	-	-	-	-	-	-	yes	-	-	-	-	-	-	-	-	-	-	-	38.69	8.66	1.0569
	JS-NGO-16s	JS-NGO-16s_250-500_1st	250-500	64	370	410	40	758500	-	-	-	-	-	-	-	-	-	-	-	-	-	-	-	-	-	-	-	-	-	-	-	-	-	-	-	yes	-	-	-	-	-	-	-	-	-	-	38.57	8.31	0.8388
	JS-NGO-16s	JS-NGO-16s_250-500_1st	250-500	65	15	15	4	112.5	-	-	-	yes	-	-	-	-	-	-	-	-	-	-	-	-	-	-	-	-	-	-	-	-	-	-	-	-	-	-	-	-	-	-	-	-	-	-	38.74	9.64	1.1621
	JS-NGO-16s	JS-NGO-16s_250-500_1st	250-500	66	330	270	40	445500	-	-	-	-	-	-	-	-	-	-	-	-	-	yes	-	-	-	-	-	-	-	-	-	-	-	-	yes	-	-	-	-	-	-	-	-	-	-	-	38.81	9.3	1.0486
	JS-NGO-16s	JS-NGO-16s_250-500_1st	250-500	67	390	630	40	1228500	-	-	-	-	-	-	-	-	-	-	-	yes	-	-	-	-	-	-	-	-	-	-	-	-	-	-	-	-	-	-	-	-	-	-	-	-	-	-	38.62	8.54	1.0601
	JS-NGO-16s	JS-NGO-16s_250-500_1st	250-500	68	280	390	40	546000	-	-	-	yes	-	-	-	-	-	-	-	-	-	-	-	-	-	-	-	-	-	-	yes	-	-	-	-	-	-	-	-	-	-	-	-	-	-	-	38.28	7.49	1.1463
	JS-NGO-16s	JS-NGO-16s_250-500_1st	250-500	69	300	350	40	525000	-	-	-	-	-	-	-	-	-	-	-	-	-	-	-	-	-	-	-	-	-	-	yes	-	-	-	yes	-	-	-	-	-	-	-	-	-	-	-	39.09	10.05	1.0177
	JS-NGO-16s	JS-NGO-16s_250-500_1st	250-500	70	230	540	40	621000	-	-	-	-	-	-	-	-	-	-	-	-	-	-	-	-	-	-	-	-	-	-	yes	-	-	-	-	-	-	-	-	-	-	-	-	-	-	-	38.83	9.29	1.2558
	JS-NGO-16s	JS-NGO-16s_250-500_1st	250-500	71	510	250	40	637500	-	-	-	-	-	-	-	-	-	-	-	-	-	yes	-	-	-	-	-	-	-	-	yes	-	-	-	-	-	-	-	-	-	-	-	-	yes	-	-	38.36	8.15	1.0109
	JS-NGO-16s	JS-NGO-16s_250-500_1st	250-500	72	190	340	40	323000	-	-	-	-	-	-	-	-	-	-	-	-	-	-	-	-	-	-	-	-	-	-	yes	-	-	-	-	-	-	-	-	-	-	-	-	-	-	-	38.86	9.3	1.0001
	JS-NGO-16s	JS-NGO-16s_250-500_1st	250-500	73	260	270	40	351000	yes	-	-	-	-	-	-	-	-	-	-	-	-	-	-	-	-	-	-	-	-	-	-	-	-	-	-	-	-	-	-	-	-	-	-	-	-	-	38.61	9.17	1.0671
	JS-NGO-16s	JS-NGO-16s_250-500_1st	250-500	74	620	280	40	868000	-	-	-	-	-	-	-	-	-	-	-	-	-	-	-	-	-	-	-	-	-	-	yes	-	-	-	-	-	-	-	-	-	-	-	-	-	-	-	38.99	9	1.1371
	JS-NGO-16s	JS-NGO-16s_250-500_1st	250-500	75	400	700	12	420000	-	-	-	-	-	-	-	-	-	-	-	-	-	-	-	-	-	-	-	-	-	-	yes	-	-	-	-	-	-	-	-	-	-	-	-	-	-	-	38.76	8.77	1.0457
	JS-NGO-16s	JS-NGO-16s_250-500_1st	250-500	76	240	140	40	168000	-	-	-	-	-	-	-	-	-	-	-	-	-	-	-	-	-	-	-	-	-	-	yes	-	-	-	-	-	-	-	-	-	-	-	-	-	-	-	38.94	8.33	1.0603
	JS-NGO-16s	JS-NGO-16s_250-500_1st	250-500	77	270	600	40	810000	-	-	-	-	-	-	-	-	-	-	-	yes	-	-	-	-	-	-	-	-	-	-	yes	-	-	-	-	-	-	-	-	-	-	-	-	-	-	-	38.86	9.06	1.2082
	JS-NGO-16s	JS-NGO-16s_250-500_1st	250-500	78	520	200	40	520000	-	-	-	-	-	-	-	-	-	-	-	-	-	yes	-	-	-	-	-	-	-	-	yes	-	-	-	-	-	-	-	-	-	-	-	-	-	-	-	38.07	7.24	1.0267
	JS-NGO-16s	JS-NGO-16s_250-500_1st	250-500	79	280	480	40	672000	-	-	-	-	-	-	-	-	-	-	-	yes	-	-	-	-	-	-	-	-	-	-	yes	-	-	-	-	-	-	-	-	-	-	-	-	-	-	-	39.17	9.03	1.3465
	JS-NGO-16s	JS-NGO-16s_250-500_1st	250-500	80	340	270	40	459000	-	-	-	-	-	-	-	-	-	-	-	-	-	-	-	-	-	-	-	-	-	-	yes	-	-	-	-	-	-	-	-	-	-	-	-	-	-	-	38.66	8.75	1.1044
	JS-NGO-16s	JS-NGO-16s_250-500_1st	250-500	81	500	430	40	1075000	-	-	-	-	-	yes	-	-	-	-	-	-	-	-	yes	-	-	-	-	-	-	-	-	-	-	-	-	-	-	yes	-	-	-	yes	-	-	yes	brookite + carbonate + pyrophyllite + pyrite + CO2	37.7	3.04	5.06
	JS-NGO-16s	JS-NGO-16s_250-500_1st	250-500	82	340	400	40	680000	-	-	-	-	-	-	-	-	-	-	-	yes	-	-	-	-	-	-	-	-	-	-	yes	-	-	-	-	-	-	-	-	-	-	-	-	-	-	-	38.62	7.66	1.1239
	JS-NGO-16s	JS-NGO-16s_250-500_1st	250-500	83	260	370	40	481000	-	-	-	yes	-	-	-	-	-	-	-	yes	-	-	-	-	-	-	-	-	-	-	-	-	-	-	yes	-	-	-	-	-	-	-	-	-	-	-	38.55	8.93	1.1758
	JS-NGO-16s	JS-NGO-16s_250-500_2nd	250-500	84	300	570	40	855000	-	-	-	-	-	-	-	-	-	-	-	-	-	-	-	-	-	-	-	-	-	-	yes	-	-	-	-	-	-	-	-	-	-	-	-	-	-	-	39.03	9.17	1.149
	JS-NGO-16s	JS-NGO-16s_250-500_2nd	250-500	85	400	790	40	1580000	-	-	-	yes	-	-	-	-	-	-	-	-	-	-	-	-	-	-	-	-	-	-	yes	-	-	-	yes	-	-	-	-	-	-	-	-	-	-	-	38.79	9.17	1.1338
	JS-NGO-16s	JS-NGO-16s_250-500_2nd	250-500	86	420	460	40	966000	-	-	-	-	-	-	-	-	-	-	-	-	-	-	-	-	-	-	-	-	-	-	yes	-	-	-	yes	-	-	-	-	-	-	-	-	-	-	-	38.26	7.04	0.8109
	JS-NGO-16s	JS-NGO-16s_250-500_2nd	250-500	87	560	300	40	840000	-	-	-	-	-	-	-	-	-	-	-	yes	-	-	-	-	-	-	-	-	-	-	-	-	-	-	yes	-	-	-	yes	-	-	-	-	-	-	-	38.34	5.66	4.65
	JS-NGO-16s	JS-NGO-16s_250-500_2nd	250-500	88	320	370	40	592000	-	-	-	-	-	-	-	-	-	-	-	-	-	-	-	-	-	-	-	-	-	-	yes	-	-	-	-	-	-	-	-	-	-	-	-	-	-	-	38.66	7.78	0.878
	JS-NGO-16s	JS-NGO-16s_250-500_2nd	250-500	89	510	210	40	535500	-	-	-	-	-	-	-	-	-	-	-	-	-	-	-	-	-	-	-	-	-	-	-	-	-	-	yes	-	-	-	-	-	-	-	-	-	-	-	39.22	9.32	1.1726
	JS-NGO-16s	JS-NGO-16s_250-500_2nd	250-500	90	430	280	40	602000	-	-	-	-	-	-	-	-	-	-	-	yes	-	-	-	-	-	-	-	-	-	-	-	-	-	-	-	-	-	-	-	-	-	-	-	-	-	-	38.67	8.25	1.1639
	JS-NGO-16s	JS-NGO-16s_250-500_2nd	250-500	91	280	530	40	742000	-	-	-	-	-	-	-	-	-	-	-	-	-	-	-	-	-	-	-	-	-	-	yes	-	-	-	yes	-	-	-	-	-	-	-	-	-	-	-	38.93	8.81	1.121
	JS-NGO-16s	JS-NGO-16s_250-500_2nd	250-500	92	380	350	40	665000	-	-	-	yes	-	-	-	-	-	-	-	-	-	-	-	-	-	-	-	-	-	-	-	-	-	-	yes	-	-	-	-	-	-	-	-	-	-	-	38.87	8.47	1.1584
	JS-NGO-16s	JS-NGO-16s_250-500_2nd	250-500	93	260	310	40	403000	-	-	-	-	-	-	-	-	-	-	-	-	-	-	-	-	-	-	-	-	-	-	yes	-	-	-	-	-	-	-	-	-	-	-	-	-	-	-	38.48	8.08	1.1821
	JS-NGO-16s	JS-NGO-16s_250-500_2nd	250-500	94	300	540	40	810000	-	-	-	yes	-	-	-	-	-	-	-	-	-	-	-	-	-	-	-	-	-	-	yes	-	-	-	-	-	-	-	-	-	-	-	-	-	-	-	38.72	8.93	1.1251
	JS-NGO-16s	JS-NGO-16s_250-500_2nd	250-500	95	300	460	40	690000	-	-	-	yes	-	-	-	-	-	-	-	-	-	-	-	-	-	-	-	-	-	-	yes	-	-	-	-	-	-	-	-	-	-	-	-	-	-	-	38.89	9.06	1.0187
	JS-NGO-16s	JS-NGO-16s_250-500_2nd	250-500	96	220	290	40	319000	-	-	-	-	-	-	-	-	-	-	-	-	-	-	-	-	-	-	-	-	-	-	yes	-	-	-	-	-	-	-	-	-	-	-	-	-	-	-	39.09	8.86	0.9869
	JS-NGO-16s	JS-NGO-16s_250-500_2nd	250-500	97	360	630	40	1134000	-	-	-	yes	-	-	-	-	-	-	-	-	-	yes	-	-	-	-	-	-	-	-	-	-	-	-	yes	-	-	-	-	-	-	-	-	yes	-	-	38.71	7.45	1.1093
	JS-NGO-16s	JS-NGO-16s_250-500_2nd	250-500	98	240	340	40	408000	yes	-	-	yes	-	-	-	-	-	-	-	-	-	-	-	-	-	-	-	-	-	-	-	-	-	-	-	-	-	yes	-	-	-	-	-	yes	-	-	38.43	5.16	6.68
	JS-NGO-16s	JS-NGO-16s_250-500_2nd	250-500	99	250	300	40	375000	yes	-	-	yes	-	yes	-	-	-	-	-	-	-	yes	-	-	-	-	-	-	-	-	-	-	-	-	-	-	-	-	-	-	-	-	-	yes	-	quartz + rutile + phlogopite-biotite	38.83	8.26	1.0448
	JS-NGO-16s	JS-NGO-16s_250-500_2nd	250-500	100	410	280	40	574000	-	-	-	-	-	-	-	-	-	-	-	-	-	-	-	-	-	-	-	-	-	-	yes	-	-	-	-	-	-	-	-	-	-	-	-	-	-	-	38.6	8.86	1.1166
	JS-NGO-17s	NGO-HM2	63-125	1	100	80	16	16000	yes	-	-	-	-	-	-	-	-	-	-	-	-	-	-	-	-	-	-	-	-	-	-	-	-	-	-	-	-	-	-	-	-	-	-	-	-	-	37.94	3.79	6.83
	JS-NGO-17s	NGO-HM2	63-125	2	200	160	28	112000	-	-	-	-	-	-	-	-	-	-	-	-	-	-	-	-	-	-	-	-	-	-	yes	-	-	-	-	-	-	-	-	-	-	-	-	-	-	-	39.04	9.2	1.0824
	JS-NGO-17s	NGO-HM2	63-125	3	50	50	24	7500	-	-	-	-	-	-	-	-	-	-	-	-	-	-	-	-	-	-	-	-	-	-	yes	-	-	-	-	-	-	-	-	-	-	-	-	-	-	-	38.82	8.22	1.3016
	JS-NGO-17s	NGO-HM2	63-125	4	60	70	13	6825	yes	-	-	-	-	-	-	-	-	-	-	-	-	-	-	-	-	-	-	-	-	-	-	-	-	-	-	-	-	-	-	-	-	-	-	-	-	-	38.46	4.57	6.74
	JS-NGO-17s	NGO-HM2	63-125	5	40	70	14	4900	-	-	-	-	-	-	-	-	-	-	-	-	-	-	-	-	-	-	-	-	-	-	-	-	-	-	-	-	-	-	yes	-	-	-	-	-	-	-	38.25	3.42	8.32
	JS-NGO-17s	NGO-HM2	63-125	6	80	80	16	12800	-	-	-	-	-	-	-	-	-	-	-	-	yes	-	-	-	-	-	-	-	-	-	-	-	-	-	-	-	-	-	-	-	-	-	-	-	-	-	37.88	3.34	8.23
	JS-NGO-17s	NGO-HM2	63-125	7	100	80	16	16000	yes	-	-	-	-	-	-	-	-	-	-	-	-	-	-	-	-	-	-	-	yes	-	-	-	-	-	yes	-	-	-	-	-	-	-	-	-	-	-	38.05	2.16	9.88
	JS-NGO-17s	NGO-HM2	63-125	8	140	120	16	33600	-	-	-	-	-	-	-	-	-	-	-	-	-	-	-	-	-	-	-	-	-	-	yes	-	-	-	-	-	-	-	-	-	-	-	-	-	-	-	38.75	8.55	1.2267
	JS-NGO-17s	NGO-HM2	63-125	9	110	120	22	36300	-	-	-	-	-	-	-	-	-	-	-	-	-	-	-	-	-	-	-	-	-	-	yes	-	-	-	-	-	-	-	-	-	-	-	-	-	-	-	38.62	7.91	1.05
	JS-NGO-17s	NGO-HM2	63-125	10	100	110	12	16500	yes	-	-	-	-	-	-	-	-	-	-	-	-	-	-	-	-	-	-	-	-	-	-	-	-	-	-	-	-	-	-	-	-	-	-	-	-	-	38.33	5.16	7.57
	JS-NGO-17s	NGO-HM2	63-125	11	40	50	10	2500	yes	-	-	-	-	-	-	-	-	-	-	-	-	-	-	-	-	-	-	-	-	-	-	-	-	-	-	-	-	-	-	-	-	-	-	-	-	-	38.03	3.03	9.84
	JS-NGO-17s	NGO-HM2	63-125	12	130	100	26	42250	-	-	-	-	-	-	-	-	-	-	-	-	-	-	-	-	-	-	-	-	-	-	yes	-	-	-	-	-	-	-	-	-	-	-	-	-	-	-	37.9	6.22	0.9499
	JS-NGO-17s	NGO-HM2	63-125	13	120	160	26	62400	-	-	-	-	-	-	-	-	-	-	-	-	-	-	-	-	-	-	-	-	-	-	yes	-	-	-	-	-	-	-	-	-	-	-	-	-	-	-	38	7.01	0.8833
	JS-NGO-17s	NGO-HM2	63-125	14	70	60	26	13650	yes	-	-	-	-	-	-	-	-	-	-	-	-	-	-	-	-	-	-	-	-	-	-	-	-	-	-	-	-	-	-	-	-	-	-	-	-	-	38.05	3.27	8.01
	JS-NGO-17s	NGO-HM2	63-125	15	120	90	28	37800	yes	-	-	-	-	-	-	-	-	-	-	-	-	yes	-	-	-	-	-	-	-	-	-	-	-	-	yes	-	-	-	yes	-	-	-	-	-	-	-	37.74	2.45	9.33
	JS-NGO-17s	NGO-HM2	63-125	16	130	120	18	35100	yes	-	-	-	-	-	-	-	-	-	-	-	-	-	-	-	-	-	-	-	-	-	-	-	-	-	-	-	-	-	-	-	-	-	-	-	-	-	38.45	5.15	6.57
	JS-NGO-17s	NGO-HM2	63-125	17	120	140	26	54600	-	-	-	-	-	-	-	-	-	-	-	-	-	-	-	-	-	-	-	-	-	-	yes	-	-	-	-	-	-	-	-	-	-	-	-	-	-	-	38.75	8.32	1.45
	JS-NGO-17s	NGO-HM2	63-125	18	110	90	30	37125	yes	-	-	-	-	-	-	-	-	-	-	-	-	-	-	-	-	-	-	-	-	-	-	-	-	-	-	-	-	-	-	-	-	-	-	-	-	-	38.94	8.72	0.8684
	JS-NGO-17s	NGO-HM2	63-125	19	70	120	30	31500	yes	-	-	-	-	-	-	-	-	-	-	-	-	-	-	-	-	-	-	-	-	-	-	-	-	-	-	-	-	-	-	-	-	-	-	-	-	-	38.36	3.45	11.38
	JS-NGO-17s	NGO-HM2	63-125	20	200	170	34	144500	-	-	-	-	-	-	-	-	-	-	-	-	-	-	-	-	-	-	-	-	-	-	yes	-	-	-	-	-	-	-	-	-	-	-	-	-	-	-	38.85	8.88	1.0147
	JS-NGO-17s	NGO-HM2	63-125	21	130	130	32	67600	yes	-	-	yes	-	-	-	-	-	-	-	-	-	-	-	-	-	-	-	-	-	-	-	-	-	-	-	-	-	-	-	-	-	-	-	-	-	-	39.12	7.05	8.15
	JS-NGO-17s	NGO-HM2	63-125	22	60	70	14	7350	yes	-	-	-	-	-	-	-	-	-	-	-	-	-	-	-	-	-	-	-	-	-	-	-	-	-	-	-	-	-	-	-	-	-	-	-	-	-	38.35	5.38	7.84
	JS-NGO-17s	NGO-HM2	63-125	23	80	150	28	42000	yes	-	-	-	-	-	-	-	-	-	-	-	-	-	-	-	-	-	-	-	-	-	-	-	-	-	-	-	-	-	-	-	-	-	-	-	-	-	38.48	5.15	6.63
	JS-NGO-17s	NGO-HM2	63-125	24	80	80	26	20800	-	-	-	-	-	-	-	-	-	-	-	-	-	-	-	-	yes	-	-	-	-	-	-	-	-	-	-	-	-	-	-	-	-	-	-	-	-	-	38.55	4.54	7.74
	JS-NGO-17s	NGO-HM2	63-125	25	130	100	22	35750	-	-	-	-	-	-	-	-	-	-	-	-	-	-	-	-	-	-	-	-	-	-	yes	-	-	-	-	-	-	-	-	-	-	-	-	-	-	-	38.55	8.63	1.0193
	JS-NGO-17s	NGO-HM2	63-125	26	40	60	36	10800	-	-	-	-	-	-	-	-	-	-	-	-	-	-	-	-	-	-	-	-	-	-	yes	-	-	-	-	-	-	-	-	-	-	-	-	-	-	-	38.4	7.3	0.8624
	JS-NGO-17s	NGO-HM2	63-125	27	80	60	40	24000	yes	-	-	-	-	-	-	-	-	-	-	-	-	-	-	-	-	-	-	-	-	-	-	-	-	-	-	-	-	-	-	-	-	-	-	-	-	-	37.93	3.71	6.79
	JS-NGO-17s	NGO-HM2	63-125	28	80	70	20	14000	yes	-	-	-	-	-	-	-	-	-	-	-	-	-	-	-	-	-	yes	-	-	-	-	-	-	-	-	-	-	-	-	-	-	-	-	-	-	-	38.51	5.44	7.2
	JS-NGO-17s	NGO-HM2	63-125	29	60	100	14	10500	-	-	-	-	-	-	-	-	-	-	-	-	-	-	-	-	-	-	-	-	-	-	yes	-	-	-	-	-	-	-	-	-	-	-	-	-	-	-	38.63	8.63	1.0796
	JS-NGO-17s	NGO-HM2	63-125	30	110	110	22	33275	-	-	-	-	-	-	-	-	-	-	-	-	-	-	-	-	-	-	-	-	-	-	yes	-	-	-	-	-	-	-	-	-	-	-	-	-	-	-	38.79	8.54	1.1847
	JS-NGO-17s	NGO-HM2	63-125	32	50	60	22	8250	yes	-	-	-	-	-	-	-	-	-	-	-	-	-	-	-	-	-	-	-	-	-	-	-	-	-	-	-	-	-	-	-	-	-	-	-	-	-	38.4	5.56	7.26
	JS-NGO-17s	NGO-HM2	63-125	33	70	60	14	7350	yes	-	-	-	-	-	-	-	-	-	-	-	-	-	-	-	-	-	-	-	-	-	-	-	-	-	-	-	-	-	-	-	-	-	-	-	-	-	38.76	6.57	7.15
	JS-NGO-17s	NGO-HM2	63-125	34	100	160	24	48000	-	-	-	-	-	-	-	-	-	-	-	-	-	-	-	-	-	-	-	-	-	-	yes	-	-	-	-	-	-	-	-	-	-	-	-	-	-	-	39.26	10.28	1.1551
	JS-NGO-17s	NGO-HM2	63-125	35	50	40	24	6000	-	-	-	yes	-	-	-	-	-	-	-	-	-	-	-	-	-	-	-	-	-	-	-	-	-	-	-	-	-	-	-	-	-	-	-	-	-	-	38.18	3.89	9.3
	JS-NGO-17s	NGO-HM2	63-125	36	180	130	24	70200	-	-	-	yes	-	-	-	-	-	-	-	-	-	-	-	-	-	-	-	-	-	-	-	-	-	-	-	-	-	-	-	-	-	-	-	-	-	-	38.54	5.34	6.9
	JS-NGO-17s	NGO-HM2	63-125	37	50	150	16	15000	-	-	-	-	-	-	-	-	-	-	-	-	-	-	-	-	-	-	-	-	-	-	yes	-	-	-	-	-	-	-	-	-	-	-	-	-	-	-	38.25	7.14	1.1146
	JS-NGO-17s	NGO-HM2	63-125	38	100	90	18	20250	yes	-	-	-	-	-	-	-	-	-	-	-	-	-	-	-	-	-	-	-	-	-	-	-	-	-	-	-	-	-	-	-	-	-	-	-	-	-	38.31	4.89	2.53
	JS-NGO-17s	NGO-HM2	63-125	39	90	90	22	22275	-	-	-	-	-	-	-	-	-	-	-	-	-	yes	-	-	-	-	-	-	-	-	-	-	-	-	-	-	-	-	-	-	-	-	-	yes	-	-	37.7	3.35	6.88
	JS-NGO-17s	NGO-HM2	63-125	40	70	110	22	21175	-	-	-	-	-	-	-	-	-	-	-	-	-	-	-	-	-	-	-	-	-	-	-	-	-	-	yes	-	-	-	-	-	-	-	-	-	-	-	37.72	2.45	9.84
	JS-NGO-17s	NGO-HM2	63-125	41	70	80	24	16800	-	-	-	yes	-	-	-	-	-	-	-	-	-	-	-	-	-	-	-	-	-	-	-	-	-	-	-	-	-	yes	-	-	-	-	-	-	yes	carbonate + CO2	38.28	5.49	6.87
	JS-NGO-17s	NGO-HM2	63-125	42	90	90	22	22275	-	-	-	-	-	-	-	-	yes	-	-	-	-	-	-	-	-	-	-	-	-	-	-	-	-	-	-	-	-	-	-	-	-	-	-	-	-	-	38.4	4.16	8.52
	JS-NGO-17s	NGO-HM2	63-125	43	80	70	24	16800	yes	-	-	-	-	-	-	-	-	-	-	-	-	-	-	-	-	-	-	-	-	-	-	-	-	-	-	-	-	-	-	-	-	-	-	-	-	-	37.78	2.61	9.59
	JS-NGO-17s	NGO-HM2	63-125	44	130	70	26	29575	-	-	-	-	-	-	-	-	-	-	-	-	yes	-	-	-	-	-	-	-	-	-	yes	-	-	-	-	-	-	-	-	-	-	-	-	-	-	-	38.84	8.61	0.9517
	JS-NGO-17s	NGO-HM2	63-125	45	100	80	30	30000	-	-	-	-	-	-	-	-	-	-	-	yes	-	-	-	-	-	-	-	-	-	-	-	-	-	-	-	-	-	yes	-	-	-	-	-	-	yes	graphite + carbonate + CO2	38.8	8.59	2.66
	JS-NGO-17s	NGO-HM2	63-125	46	130	90	20	29250	-	-	-	-	-	-	-	-	-	-	-	-	-	-	-	-	-	-	-	-	-	-	-	-	-	-	-	-	-	-	-	-	-	-	yes	-	-	-	38.03	5.89	4.26
	JS-NGO-17s	NGO-HM2	63-125	47	90	80	18	16200	yes	-	-	-	-	-	-	-	-	-	-	-	-	-	-	-	-	-	-	-	-	-	-	-	-	-	-	-	-	-	-	-	-	-	-	-	-	-	37.97	3.95	6.84
	JS-NGO-17s	NGO-HM2	63-125	48	100	90	34	38250	yes	-	-	-	-	-	-	-	-	-	-	-	-	-	-	-	-	-	-	-	-	-	-	-	-	-	-	-	-	-	-	-	-	-	-	-	-	-	38.38	4.9	6.7
	JS-NGO-17s	NGO-HM2	63-125	49	100	150	36	67500	yes	-	-	-	-	-	-	-	-	-	-	-	-	-	-	-	-	-	-	-	-	-	-	-	-	-	-	-	-	-	-	-	-	-	-	-	-	-	38.13	2.67	12.72
	JS-NGO-17s	NGO-HM2	63-125	50	70	70	30	18375	-	-	-	-	-	-	-	-	-	-	-	-	-	-	-	-	-	-	-	-	-	-	yes	-	-	-	-	-	-	-	-	-	-	-	-	-	-	-	38.26	7.29	1.1261
	JS-NGO-17s	NGO-HM2	63-125	51	110	60	24	19800	-	-	-	-	-	-	-	-	-	-	-	-	-	-	-	-	-	-	-	-	-	-	yes	-	-	-	-	-	-	-	-	-	-	-	-	-	-	-	38.8	9.18	1.0628
	JS-NGO-17s	NGO-HM2	63-125	52	80	70	10	7000	-	-	-	-	-	-	-	-	yes	-	-	-	-	-	-	-	-	-	-	-	-	-	-	-	-	-	-	-	-	yes	-	-	-	-	-	-	-	-	38.36	5.42	7.13
	JS-NGO-17s	NGO-HM2	63-125	53	90	110	22	27225	-	-	-	-	-	-	-	-	yes	-	-	-	-	-	-	-	-	-	-	-	-	-	-	-	-	-	-	-	-	-	yes	-	-	-	-	-	-	-	37.5	2.26	8.69
	JS-NGO-17s	NGO-HM2	63-125	54	50	70	14	6125	-	-	-	yes	-	-	-	-	-	-	-	-	-	-	-	-	-	-	-	-	-	-	yes	-	-	-	-	-	-	-	-	-	-	-	-	-	-	-	38.53	8.11	0.9547
	JS-NGO-17s	NGO-HM2	63-125	55	70	80	12	8400	yes	-	-	-	-	-	-	-	-	-	-	-	-	-	-	-	-	-	-	-	-	-	-	-	-	-	-	-	-	-	-	yes	-	-	-	-	-	-	38.63	6.08	6.77
	JS-NGO-17s	NGO-HM2	63-125	56	90	90	24	24300	yes	-	-	-	-	-	-	-	-	-	-	-	-	-	-	-	-	-	-	-	-	-	-	-	-	-	-	-	-	-	-	-	-	-	-	-	-	-	37.97	4.64	7.5
	JS-NGO-17s	NGO-HM2	63-125	57	70	70	24	14700	yes	-	-	-	-	-	-	-	-	-	-	-	-	-	-	-	-	-	-	-	-	-	-	-	-	-	-	-	-	-	-	-	-	-	-	-	-	-	38.18	3.73	7.41
	JS-NGO-17s	NGO-HM2	63-125	58	100	100	18	22500	yes	-	-	-	-	-	-	-	-	-	-	-	-	-	-	-	-	-	-	-	-	-	-	-	-	-	yes	-	-	-	-	-	-	-	-	-	-	-	38.35	7.04	1.0611
	JS-NGO-17s	NGO-HM2	63-125	59	90	40	10	4500	yes	-	-	-	-	-	-	-	-	-	-	-	-	-	-	-	-	-	-	-	-	-	-	-	-	-	-	-	-	-	-	-	-	-	-	-	-	-	37.59	2.37	8.01
	JS-NGO-17s	NGO-HM2	63-125	60	80	80	10	8000	-	-	-	-	-	-	-	-	-	-	-	-	-	-	-	-	-	-	-	-	-	-	-	-	-	-	-	-	-	yes	-	-	-	-	-	-	-	-	38.62	4.61	8.77
	JS-NGO-17s	NGO-HM2	63-125	61	40	60	22	6600	-	-	-	-	-	-	-	-	-	-	-	-	-	-	-	-	-	-	-	-	-	-	yes	-	-	-	-	-	-	-	-	-	-	-	-	-	-	-	38.96	9.63	1.2537
	JS-NGO-17s	NGO-HM2	63-125	62	70	90	10	7875	yes	-	-	-	-	-	-	-	-	-	-	-	-	-	-	-	-	-	-	-	-	-	-	-	-	-	-	-	-	-	-	-	-	-	-	-	-	-	38.05	4.24	7.22
	JS-NGO-17s	NGO-HM2	63-125	63	70	70	22	13475	yes	-	-	-	-	-	-	-	-	-	-	-	-	-	-	-	-	-	-	-	-	-	-	-	-	-	-	-	-	-	-	-	-	-	-	-	-	-	38.41	5.05	7.47
	JS-NGO-17s	NGO-HM2	63-125	64	50	40	10	2500	yes	-	-	-	-	-	-	-	-	-	-	-	-	-	-	-	-	-	-	-	-	-	-	-	-	-	-	-	-	-	-	-	-	-	-	-	-	-	38.49	5.38	6.56
	JS-NGO-17s	NGO-HM2	63-125	65	100	90	22	24750	-	-	-	-	-	-	-	yes	-	-	-	yes	-	-	-	-	-	-	-	-	-	-	-	-	-	-	-	-	-	-	-	-	-	-	-	-	-	-	37.82	3.16	8.64
	JS-NGO-17s	NGO-HM2	63-125	66	80	50	8	4000	yes	-	-	-	-	-	-	-	-	-	-	-	-	-	-	-	-	-	-	-	-	-	-	-	-	-	-	-	-	-	-	-	-	-	-	-	-	-	36.84	0.8057	8.58
	JS-NGO-17s	NGO-HM2	63-125	67	80	60	16	9600	-	-	-	-	-	-	-	-	-	-	-	-	-	yes	-	-	-	-	-	-	-	-	-	-	-	-	-	-	-	-	-	-	-	-	-	-	-	-	37.79	2.25	8.71
	JS-NGO-17s	NGO-HM2	63-125	69	90	60	10	6750	yes	-	-	-	-	-	-	-	-	-	-	-	-	-	-	-	yes	-	-	-	-	-	-	-	-	-	-	-	-	-	yes	-	-	-	yes	-	-	-	37.34	2.45	8.12
	JS-NGO-17s	NGO-HM2	63-125	70	70	80	16	11200	yes	-	-	-	-	-	-	-	-	-	-	-	-	-	-	-	-	-	-	-	-	-	-	-	-	-	-	-	-	-	-	-	-	-	-	-	-	-	37.54	3.4	6.97
	JS-NGO-17s	NGO-HM2	63-125	71	70	80	30	21000	yes	-	-	-	-	-	-	-	-	-	-	-	-	-	-	-	-	-	-	-	-	-	-	-	-	-	-	-	-	-	-	-	-	-	-	-	-	-	37.99	4.13	6.59
	JS-NGO-17s	NGO-HM2	63-125	72	62	74	20	11470	yes	-	-	-	-	-	-	-	-	-	-	-	-	-	-	-	-	-	-	-	-	-	-	-	-	-	-	-	-	-	-	-	-	-	-	-	-	-	38.29	3.32	8.55
	JS-NGO-17s	NGO-HM2	63-125	73	110	120	12	19800	yes	-	-	-	-	-	-	-	-	-	-	yes	-	-	-	-	-	-	-	-	yes	-	-	-	-	-	-	-	-	-	-	-	-	-	-	-	-	-	38.24	3.25	10.7
	JS-NGO-17s	NGO-HM2	63-125	74	70	84	18	13230	-	-	-	-	-	-	-	-	-	-	-	-	-	-	-	-	-	-	-	-	-	-	-	-	-	-	yes	-	-	-	yes	-	-	-	-	-	-	-	37.92	3.41	7.77
	JS-NGO-17s	NGO-HM2	63-125	75	70	50	12	5250	-	-	-	-	-	-	-	-	-	-	-	-	-	-	-	-	-	-	-	-	-	-	-	-	-	-	yes	-	-	-	-	-	-	-	-	-	-	-	38	2.48	11.11
	JS-NGO-17s	NGO-HM2	63-125	76	50	70	18	7875	yes	-	-	yes	-	-	-	-	-	-	-	-	-	-	-	-	-	-	-	-	-	-	-	-	-	-	-	-	-	-	-	-	-	-	-	-	-	-	38.87	6.65	7.35
	JS-NGO-17s	NGO-HM2	63-125	77	130	120	10	19500	yes	-	-	-	-	-	-	-	-	-	-	-	-	-	-	-	-	-	-	-	-	-	-	-	-	-	-	-	-	-	-	-	-	-	-	-	-	-	37.46	5.18	1.9
	JS-NGO-17s	NGO-HM2	63-125	78	80	80	28	22400	yes	-	-	-	-	-	-	-	-	-	-	-	-	-	-	-	-	-	-	-	-	-	-	-	-	-	-	-	-	-	-	-	-	-	-	-	-	-	38.42	5.16	7.4
	JS-NGO-17s	NGO-HM2	63-125	79	150	130	30	73125	yes	-	-	yes	-	-	-	-	-	-	-	-	-	-	-	-	-	-	-	-	-	-	-	-	-	-	-	-	-	-	-	-	-	-	-	-	-	-	38.7	6.12	7.61
	JS-NGO-17s	NGO-HM2	63-125	80	90	70	18	14175	yes	-	-	-	-	-	-	-	-	-	-	-	-	-	-	-	-	-	-	-	-	-	-	-	-	-	-	-	-	-	yes	-	-	-	-	-	-	-	37.8	3.36	8.47
	JS-NGO-17s	NGO-HM2	63-125	81	80	70	20	14000	-	-	-	-	-	-	-	-	-	-	-	yes	-	-	-	-	-	-	-	-	-	-	-	-	-	-	-	-	-	-	-	-	-	-	-	-	-	-	38.75	8.72	1.52
	JS-NGO-17s	NGO-HM2	63-125	82	60	60	10	4500	yes	-	-	-	-	-	-	-	-	-	-	-	-	-	-	-	-	-	-	-	-	-	-	-	-	-	-	-	-	-	-	-	-	-	-	-	-	-	38.13	4.43	7.34
	JS-NGO-17s	NGO-HM2	63-125	83	50	40	8	2000	yes	-	-	-	-	-	-	-	-	-	-	-	-	-	-	-	-	-	-	-	-	-	-	-	-	-	-	-	-	-	-	-	-	-	-	yes	-	-	38.24	3.56	10.33
	JS-NGO-17s	NGO-HM2	63-125	84	60	120	10	9000	-	-	-	-	-	-	-	-	-	-	-	-	-	-	-	-	-	-	-	-	-	-	yes	-	-	-	-	-	-	-	-	-	-	-	-	-	-	-	38.04	6.41	1.2525
	JS-NGO-17s	NGO-HM2	63-125	85	90	80	14	12600	yes	-	-	yes	-	-	-	-	-	-	-	-	-	-	-	-	-	-	-	-	-	-	-	-	-	-	-	-	-	yes	-	-	-	-	-	-	-	-	38.29	5.29	6.97
	JS-NGO-17s	NGO-HM2	63-125	86	70	80	16	11200	yes	-	-	-	yes	-	-	-	-	-	-	-	-	-	-	-	-	-	-	-	-	-	-	-	-	-	-	-	-	-	-	-	-	-	-	-	-	-	38.32	5.32	7.56
	JS-NGO-17s	NGO-HM2	63-125	87	90	90	14	14175	yes	-	-	-	-	-	-	-	-	-	-	-	-	-	-	-	-	-	-	-	-	-	-	-	-	-	-	-	-	-	-	-	-	-	-	-	-	-	38.66	6.46	7.65
	JS-NGO-17s	NGO-HM2	63-125	88	120	110	30	49500	-	-	-	-	-	-	-	-	-	-	-	-	-	-	-	-	-	-	-	-	-	-	-	yes	-	-	-	-	-	-	-	-	-	-	-	-	-	-	38.99	9.43	1.1722
	JS-NGO-17s	NGO-HM2	63-125	89	60	50	16	6000	-	-	-	-	-	-	-	-	-	-	-	-	-	-	-	-	-	-	yes	-	-	-	-	-	-	-	-	-	-	-	-	-	-	-	-	-	-	-	37.69	2.55	9.09
	JS-NGO-17s	NGO-HM2	63-125	90	170	170	40	144500	-	-	-	-	-	-	-	-	-	-	-	-	-	-	-	-	-	-	-	-	-	-	-	-	-	-	yes	-	-	-	-	-	-	-	-	-	-	-	38.76	9.11	1.0829
	JS-NGO-17s	NGO-HM2	63-125	91	50	60	12	4500	-	-	-	-	-	-	-	-	-	-	-	-	-	-	-	-	-	-	-	-	-	-	yes	-	-	-	-	-	-	-	-	-	-	-	-	-	-	-	38.51	8.36	0.819
	JS-NGO-17s	NGO-HM2	63-125	92	80	120	22	26400	yes	-	-	-	-	-	-	yes	-	-	-	-	-	-	-	-	-	-	-	-	-	-	-	-	-	-	-	-	-	-	-	-	-	-	-	-	-	-	38.26	4.21	7.97
	JS-NGO-17s	NGO-HM2	63-125	93	110	80	26	28600	yes	-	-	-	-	-	-	-	-	-	-	-	-	-	-	-	-	-	-	-	-	-	-	-	-	-	-	-	-	-	-	-	-	-	-	-	-	-	38.4	7.73	0.8943
	JS-NGO-17s	NGO-HM2	63-125	94	180	160	24	86400	-	-	-	-	-	-	-	-	-	-	-	-	-	-	-	-	-	-	-	-	-	-	yes	-	-	-	-	-	-	-	-	-	-	-	-	-	-	-	38.73	8.71	1.0765
	JS-NGO-17s	NGO-HM2	63-125	95	50	60	18	6750	-	-	-	-	-	-	-	-	-	-	-	-	-	-	-	-	-	-	-	-	-	-	-	yes	-	-	-	-	-	-	-	-	-	-	-	-	-	-	39	9.11	1.1405
	JS-NGO-17s	NGO-HM2	63-125	96	50	60	14	5250	yes	-	-	-	-	-	-	-	-	-	-	-	-	-	-	-	-	-	-	-	-	-	-	-	-	-	-	-	-	-	-	-	-	-	-	-	-	-	37.88	4.38	6.79
	JS-NGO-17s	NGO-HM2	63-125	97	60	60	34	15300	-	-	-	-	-	-	-	-	-	-	-	-	-	-	-	-	-	-	-	-	-	-	-	-	-	-	yes	-	-	-	yes	-	-	-	yes	-	-	-	37.67	3.47	6.62
	JS-NGO-17s	NGO-HM2	63-125	98	90	110	20	24750	yes	-	-	-	-	-	-	-	-	-	-	-	-	yes	-	-	-	-	-	-	-	-	-	-	-	-	-	-	-	-	-	-	-	-	-	-	-	-	37.26	1.2625	8.07
	JS-NGO-17s	NGO-HM2	63-125	99	110	150	24	49500	-	-	-	-	-	-	-	-	-	-	-	-	-	-	-	-	-	-	-	-	-	-	yes	-	-	-	-	-	-	-	-	-	-	-	-	-	-	-	39	8.52	1.3493
	JS-NGO-17s	NGO-HM2	63-125	100	80	80	16	12800	-	-	-	-	-	-	-	-	-	-	-	-	-	-	-	-	-	-	-	-	-	-	-	yes	-	-	-	-	-	-	-	-	-	-	-	-	-	-	38.17	8.65	1.082
	JS-NGO-17s	NGO-HM2	63-125	101	110	70	16	15400	-	-	-	yes	-	-	-	-	-	-	-	-	-	-	-	-	-	-	-	-	-	-	-	-	-	-	-	-	-	-	-	-	-	-	-	-	-	-	39.58	12.45	1.3042
	JS-NGO-17s	NGO-HM2	63-125	102	140	80	26	36400	-	-	-	-	-	-	-	-	-	-	-	-	-	-	-	-	-	-	yes	-	-	-	-	-	-	-	-	-	-	-	-	-	-	-	-	-	-	-	37.66	3.79	6.71
	JS-NGO-17s	NGO-HM2	63-125	103	70	50	14	6125	yes	-	-	-	-	-	-	-	-	-	-	-	-	-	-	-	-	-	-	-	-	-	-	-	-	-	-	-	-	-	-	-	-	-	-	-	-	-	37.71	3.22	8.31
	JS-NGO-17s	NGO-HM2	63-125	104	90	60	18	12150	-	-	-	-	-	-	-	-	-	-	-	-	yes	-	-	-	-	-	-	-	-	-	-	-	-	-	-	-	-	yes	-	-	-	-	-	-	-	CO2	37.82	6.05	1.2689
	JS-NGO-17s	NGO-HM2	63-125	105	220	160	28	123200	yes	-	-	-	-	-	-	-	-	-	-	-	-	-	-	-	-	-	-	-	-	-	-	-	-	-	-	-	-	yes	-	-	-	-	-	-	-	-	37.57	1.52	7.32
	JS-NGO-17s	NGO-HM4	125-250	2	220	270	40	297000	-	-	-	-	-	-	-	-	-	-	-	-	-	-	-	-	-	-	-	-	-	-	yes	-	-	-	-	-	-	-	-	-	-	-	-	-	-	-	38.39	7.22	1.017
	JS-NGO-17s	NGO-HM4	125-250	3	220	200	40	220000	yes	-	-	-	-	-	-	-	-	-	-	-	-	-	-	-	-	-	-	-	-	-	-	-	-	-	-	-	-	-	yes	-	-	-	-	-	-	-	38	3.28	7.82
	JS-NGO-17s	NGO-HM4	125-250	4	180	270	40	243000	yes	-	-	-	-	-	-	-	-	-	-	-	-	-	-	-	-	-	-	-	-	-	-	-	-	-	-	-	-	-	-	-	-	-	-	-	-	-	37.79	5.54	2.36
	JS-NGO-17s	NGO-HM4	125-250	5	110	110	40	60500	-	-	-	-	-	-	-	-	-	-	-	-	-	-	-	-	-	-	-	-	-	-	yes	-	-	-	-	-	-	-	-	-	-	-	-	-	-	-	38.39	8.3	1.1552
	JS-NGO-17s	NGO-HM4	125-250	6	80	280	40	112000	-	-	-	yes	-	-	-	-	-	-	-	-	-	-	-	-	-	-	-	-	-	-	-	-	-	-	-	-	-	-	-	-	-	-	-	-	-	-	38.58	7.53	1.41
	JS-NGO-17s	NGO-HM4	125-250	7	160	210	40	168000	yes	-	-	-	-	-	-	-	-	-	-	-	-	-	-	-	-	-	-	-	-	-	-	-	-	-	-	-	-	-	-	-	-	-	-	-	-	-	38.41	8.57	1.44
	JS-NGO-17s	NGO-HM4	125-250	8	150	230	28	120750	-	-	-	-	yes	-	-	-	-	-	-	-	-	-	-	-	-	-	-	-	-	-	yes	-	-	-	-	-	-	-	-	-	-	-	-	-	-	-	38.28	8.27	1.0771
	JS-NGO-17s	NGO-HM4	125-250	9	270	270	40	364500	-	-	-	yes	-	-	-	-	-	-	-	-	-	-	-	-	-	-	-	-	-	-	yes	-	-	-	-	-	-	-	-	-	-	-	-	-	-	-	38.46	7.74	1.1565
	JS-NGO-17s	NGO-HM4	125-250	10	270	240	40	324000	-	-	-	-	-	-	-	-	-	-	-	-	-	-	-	-	-	-	-	-	-	-	yes	-	-	-	yes	-	-	-	-	-	-	-	-	-	-	-	38.51	7.66	0.8355
	JS-NGO-17s	NGO-HM4	125-250	11	180	140	40	126000	-	-	-	yes	-	yes	-	-	-	-	-	-	-	-	-	-	-	-	-	-	-	-	-	-	-	-	-	-	-	-	-	-	-	-	yes	-	-	-	38.58	8.49	1.3076
	JS-NGO-17s	NGO-HM4	125-250	12	250	240	40	300000	yes	-	-	yes	-	-	-	yes	-	-	-	-	-	yes	-	-	-	-	-	-	-	-	-	-	-	-	-	-	-	yes	-	-	-	-	-	-	-	quartz + alkali feldspar + phlogopite-biotite	38.77	8.15	2.1
	JS-NGO-17s	NGO-HM4	125-250	13	90	320	40	144000	yes	-	-	-	-	-	-	-	-	-	-	-	-	-	-	-	-	-	-	-	-	-	-	-	-	-	-	-	-	-	-	-	-	-	-	-	-	-	38.94	8.8	2.32
	JS-NGO-17s	NGO-HM4	125-250	15	200	240	40	240000	-	-	-	-	-	-	-	-	-	-	-	-	-	-	-	-	-	-	-	-	-	-	yes	-	-	-	-	-	-	-	-	-	-	-	-	-	-	-	38.56	8.95	1.0649
	JS-NGO-17s	NGO-HM4	125-250	16	320	110	30	132000	-	-	-	-	-	-	-	-	-	-	-	-	-	-	-	-	-	-	-	-	-	-	-	-	-	-	-	-	-	-	-	-	-	-	yes	-	-	-	38.31	7.09	1.3218
	JS-NGO-17s	NGO-HM4	125-250	17	230	360	40	414000	-	-	-	yes	-	-	-	-	-	-	-	-	-	-	-	-	-	-	-	-	-	-	-	-	-	-	-	-	-	-	-	-	-	-	-	-	-	-	38.85	8.18	0.956
	JS-NGO-17s	NGO-HM4	125-250	18	190	200	40	190000	yes	-	-	yes	-	-	-	-	-	-	-	-	-	-	-	-	-	-	-	-	-	-	-	-	-	-	-	-	-	-	-	-	-	-	-	-	-	-	38.7	8.73	2.81
	JS-NGO-17s	NGO-HM4	125-250	19	190	300	40	285000	yes	-	-	-	-	-	-	-	-	-	-	-	-	-	-	-	-	-	-	-	-	-	-	-	-	-	yes	-	-	-	-	-	-	-	-	-	-	-	38.01	6.8	1.85
[truncated: 790 more rows]
[truncated: 69 more columns]

## Sheet: Table S3
	Detrital garnet petrology challenges Paleoproterozoic ultrahigh-pressure metamorphism in western Greenland Jan Schönig1, Carsten Benner1, Guido Meinhold2, Hilmar von Eynatten1, N. Keno Lünsdorf1 1Department of Sedimentology and Environmental Geology, Geoscience Centre Göttingen, University of Göttingen, Göttingen, D-37077, Germany 2Institute of Geology, TU Bergakademie Freiberg, Freiberg, D-09599…
[truncated: 572 more rows]
[truncated: 20 more columns]
